# Supplementary material for: Enantioselective direct vinylogous Michael addition for constructing enantioenriched γ,γ-dialkyl substituted butyrolactams and octahydroindoles
Source: Royal Society of Chemistry journal article supplement (doi:10.1039/d2ob00112h), 2022-01-01
Supplement: d2ob00112h1.pdf [file d2ob00112h1.pdf]

*Supporting Information for*

**Enantioselective Direct Vinylogous Michael Addition for  
Constructing Enantioenriched  $\gamma,\gamma$ -Dialkyl Substituted  
Butyrolactams and Octahydroindoles†**

Jiahang Yan,<sup>‡a</sup> Wenting Zhang,<sup>b‡</sup> Qiaoqiao He,<sup>a</sup> Jun Hou,<sup>a</sup> Hongxin Zeng,<sup>a</sup> Hongbo Wei<sup>\*a</sup> and Weiqing

Xie<sup>\*a,b</sup>

<sup>a</sup>Shaanxi Key Laboratory of Natural Products & Chemical Biology, College of Chemistry & Pharmacy,  
Northwest A&F University, 22 Xinong Road, Yangling 712100, Shaanxi, China. Email:

xiewq@nwfau.edu.cn

<sup>b</sup>State Key Laboratory of Stress Biology for Arid Areas, Northwest A&F University, Yangling 712100,  
Shaanxi, China.

## Table of Contents

|                                                                                  |     |
|----------------------------------------------------------------------------------|-----|
| 1. General Information .....                                                     | 2   |
| 2. Reaction Conditions Optimization .....                                        | 3   |
| 2.1 General Procedure .....                                                      | 3   |
| 2.2 Screening Details for the Model Reaction.....                                | 3   |
| 2.3 Screening Details for the Tandem-Michael Reaction.....                       | 6   |
| 3. Preparation of Substrates.....                                                | 7   |
| 3.1 Preparation of Unsaturated <i>N</i> -Boc- $\gamma$ -lactam.....              | 7   |
| 3.2 Preparation of other unsaturated <i>N</i> -protecting- $\gamma$ -lactam..... | 9   |
| 3.3 Preparation of benzyl vinyl ketones .....                                    | 15  |
| 4. Substrate Scope of the Michael Addition Reaction .....                        | 21  |
| 4.1 Preparation of 15 .....                                                      | 21  |
| 4.2 Preparation of 17 .....                                                      | 25  |
| 5. NMR Spectra.....                                                              | 30  |
| 6. HPLC Data .....                                                               | 103 |
| 7. X-Ray Single Crystal Diffraction Data .....                                   | 126 |

## 1. General Information

All commercially available reagents were used without further purification unless otherwise noted. All solvents were dried and distilled as follow: THF and Et<sub>2</sub>O were distilled from sodium; CH<sub>2</sub>Cl<sub>2</sub> and toluene were distilled from calcium hydride; CHCl<sub>3</sub> was distilled from P<sub>2</sub>O<sub>5</sub>, anhydrous 1,2-dichloroethane (Aladdin, 99.8%, with molecular sieves), acetonitrile, 1,4-dioxane, 2-Methylfuran, and other solvents were commercially available. Thin layer chromatography was conducted on Merck 60 F254 pre-coated silica gel plates. Column chromatography was carried out by normal 200-400 mesh silica gel. All new compounds gave satisfactory spectroscopic analyses (<sup>1</sup>H NMR, <sup>13</sup>C NMR, HRMS). NMR spectra were recorded on Bruker AVANCE III 500MHz NMR spectrometer. HRMS spectra were obtained from IonSpec 4.7 Tesla FTMS mass spectrometer (MALDI), Bruker APEXIII 7.0 TESLA FTMS (ESI). Chiral HPLC analyses were performed on Waters 2487 Series using Daicel Chiralpak (AD-H, OD-H, IC and IB-3) column with hexane/iPrOH/MeOH as the eluent. Optical rotations were measured on Anton Paar MCP 300 polarimeter.

## 2. Reaction Conditions Optimization

### 2.1 General Procedure

Unless noted otherwise, reactions were carried out for the following procedure. Metal salt (5 mol% or 10 mol%), *N, N'*-dioxide ligand (6 mol% or 12 mol %), base (1.0 equiv.), and 4Å molecular sieves (20.0 mg) were stirred in anhydrous solvent (0.2 M) under argon atmosphere at 35 °C for 1 hour. Then a mixture of  $\alpha, \beta$ -Unsaturated  $\gamma$ -butyrolactam **13** and  $\alpha, \beta$ -unsaturated ketones **14** or **16** in the solvent was added to the above solution. The mixture was stirred at 35 °C until TLC showed the starting material was no longer consumed. The reaction mixture was filtered through Celite® and washed with EtOAc. The filtrate was then concentrated under reduced pressure to give a residue which was purified by silica gel chromatography to afford the addition product **15** or **17**.

### 2.2 Screening Details for the Model Reaction

**Table S1.** The screening of catalysts<sup>[a]</sup>

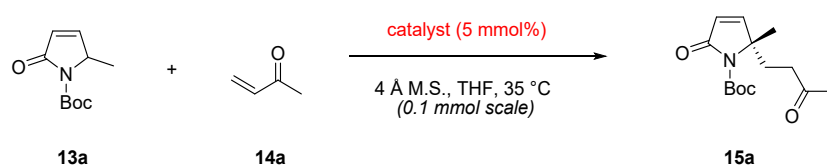

**13a** + **14a**  $\xrightarrow[\text{(0.1 mmol scale)}]{\text{catalyst (5 mmol\%)}, \text{4 Å M.S., THF, 35 °C}}$  **15a**

---



**Ca-1:** R=Ph  
**Ca-2:** R=<sup>t</sup>Bu  
**Ca-3**  
**Ca-4**  
**L-1**

| Entry | Catalyst                                                                  | Yield (%) | ee (%) |
|-------|---------------------------------------------------------------------------|-----------|--------|
| 1     | —                                                                         | NR        | —      |
| 2     | <b>Ca-1</b> /Ni(BF <sub>4</sub> ) <sub>2</sub> ·6H <sub>2</sub> O (1.2:1) | NR        | —      |
| 3     | <b>Ca-2</b> /Ni(BF <sub>4</sub> ) <sub>2</sub> ·6H <sub>2</sub> O (1.2:1) | Trace     | —      |
| 4     | <b>Ca-3</b> /Ni(BF <sub>4</sub> ) <sub>2</sub> ·6H <sub>2</sub> O (1.2:1) | NR        | —      |
| 5     | <b>Ca-4</b>                                                               | 5         | 6      |
| 6     | <b>L-1</b> /Ni(BF <sub>4</sub> ) <sub>2</sub> ·6H <sub>2</sub> O (1.2:1)  | 41        | 67     |

[a] Unless noted otherwise, reactions performed using 1.0 equiv of **13a** (0.1 mmol, 0.2 M), 1.2 equiv of **14a**, 1.0 equiv of K<sub>2</sub>CO<sub>3</sub>, 5 mmol % catalyst, and 20 mg 4 Å M.S. at 35 °C in THF for 24 h.

**Table S2.** The screening of solvents<sup>[a]</sup>
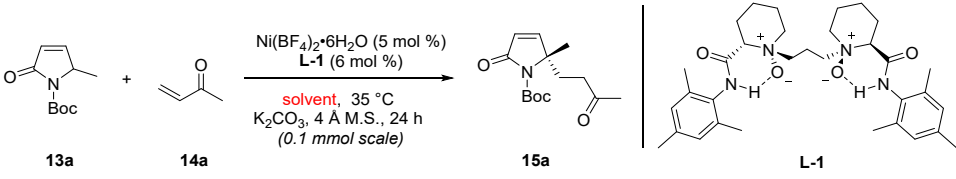

| Entry | Solvent            | Yield (%) | ee (%) |
|-------|--------------------|-----------|--------|
| 1     | THF                | 41        | 67     |
| 2     | 1,4-dioxane        | 56        | 54     |
| 3     | CHCl <sub>3</sub>  | 33        | 69     |
| 4     | EtOAc              | 37        | 65     |
| 5     | 2-methylfuran      | 30        | 62     |
| 6     | DCM                | 41        | 52     |
| 7     | 1,2-DCE            | 59        | 84     |
| 8     | CH <sub>3</sub> CN | 61        | 84     |
| 9     | Acetone            | 19        | 83     |
| 10    | <i>i</i> -PrOH     | 30        | 67     |

[a] Reactions performed using 1.0 equiv of **13a** (0.1 mmol, 0.2 M), 1.2 equiv of **14a**, 1.0 equiv of K<sub>2</sub>CO<sub>3</sub>, 5 mmol % catalyst, and 20 mg 4 A.M.S. at 35 °C for 24 h.

**Table S3.** The screening of bases<sup>[a]</sup>
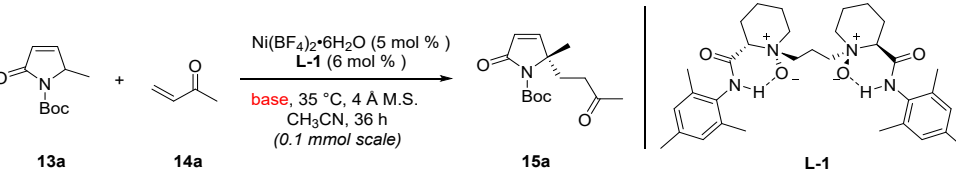

| Entry | Base               | Yield (%) | ee (%) |
|-------|--------------------|-----------|--------|
| 1     | KHCO <sub>3</sub>  | 68        | 84     |
| 2     | NaHCO <sub>3</sub> | 32        | 84     |
| 3     | DBU                | 30        | 14     |
| 4     | 2,6-Lutidine       | 15        | 81     |
| 5     | pyridine           | NR        | —      |
| 6     | Quinine            | 56        | 78     |
| 7     | Quinidine          | 63        | 80     |

[a] Unless noted otherwise, reactions performed using 1.0 equiv of **13a** (0.1 mmol, 0.2 M), 1.2 equiv of **14a**, 1.0 equiv of base, 5 mmol % catalyst, and 20 mg 4 A.M.S. at 35 °C in CH<sub>3</sub>CN for 36 h.

**Table S4.** The screening of metal salts<sup>[a]</sup>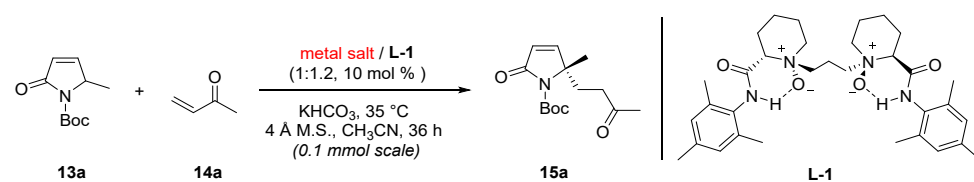

| Entry | Metal salt                                            | Yield (%) | ee (%) |
|-------|-------------------------------------------------------|-----------|--------|
| 1     | $\text{Ni}(\text{OTf})_2$                             | 70        | 84     |
| 2     | $\text{Ni}(\text{acac})_2$                            | 11        | 41     |
| 3     | $\text{NiCl}_2$                                       | Trace     | —      |
| 4     | $\text{NiCl}_2 \cdot 6\text{H}_2\text{O}$             | Trace     | —      |
| 5     | $\text{Ni}(\text{BF}_4)_2 \cdot 6\text{H}_2\text{O}$  | 75        | 84     |
| 6     | $\text{Ni}(\text{ClO}_4)_2 \cdot 6\text{H}_2\text{O}$ | 84        | 84     |

[a] Unless noted otherwise, reactions performed using 1.0 equiv of **13a** (0.1 mmol, 0.2 M), 1.2 equiv of **14a**, 1.0 equiv of  $\text{KHCO}_3$ , 10 mmol % catalyst, and 20 mg 4 Å M.S. at  $35^\circ\text{C}$  in  $\text{CH}_3\text{CN}$  for 36 h.

**Table S5.** The screening of *N, N'*-dioxide ligands<sup>[a]</sup>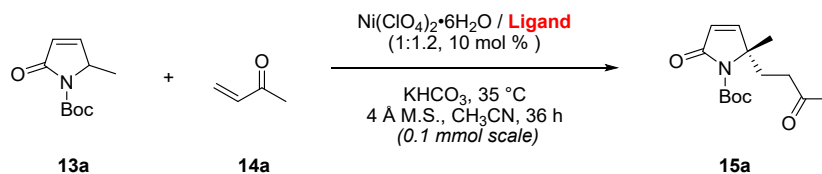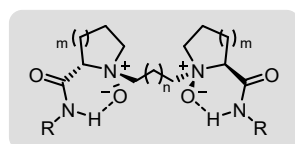

- L-1:** R=2,4,6-Me<sub>3</sub>C<sub>6</sub>H<sub>2</sub>, m=2, n=1  
**L-2:** R=2,4,6-Me<sub>3</sub>C<sub>6</sub>H<sub>2</sub>, m=1, n=1  
**L-3:** R=2,4,6-Me<sub>3</sub>C<sub>6</sub>H<sub>2</sub>, m=2, n=0  
**L-4:** R=2,6-Me<sub>2</sub>C<sub>6</sub>H<sub>3</sub>, m=2, n=1  
**L-5:** R=2,6-Et<sub>2</sub>-4-MeC<sub>6</sub>H<sub>2</sub>, m=2, n=1  
**L-6:** R=2,6-Et<sub>2</sub>-4-MeC<sub>6</sub>H<sub>2</sub>, m=2, n=0  
**L-7:** R=2,6-Me<sub>2</sub>C<sub>6</sub>H<sub>3</sub>, m=2, n=0  
**L-8:** R=2,6-*i*-Pr<sub>2</sub>C<sub>6</sub>H<sub>3</sub>, m=2, n=1  
**L-9:** R=2,6-*i*-Pr<sub>2</sub>C<sub>6</sub>H<sub>3</sub>, m=1, n=1

| Entry | Ligand (1.2x mol%) | Yield (%) | ee (%) |
|-------|--------------------|-----------|--------|
| 1     | L-1                | 84        | 84     |
| 2     | L-2                | 33        | 66     |
| 3     | L-3                | 44        | 31     |
| 4     | L-4                | 63        | 83     |
| 5     | L-5                | 48        | 80     |
| 6     | L-6                | 44        | 26     |
| 7     | L-7                | NR        | —      |
| 8     | L-8                | 61        | 78     |
| 9     | L-9                | 11        | 69     |

[a] Unless noted otherwise, reactions performed using 1.0 equiv of **13a** (0.1 mmol, 0.2 M), 1.2 equiv of **14a**, 1.0 equiv of  $\text{KHCO}_3$ , 10 mmol % catalyst, and 20 mg 4 Å M.S. at  $35^\circ\text{C}$  in  $\text{CH}_3\text{CN}$  for 36 h.

## 2.3 Screening Details for the Tandem-Michael Reaction

**Table S6.** The screening of solvents<sup>[a]</sup>

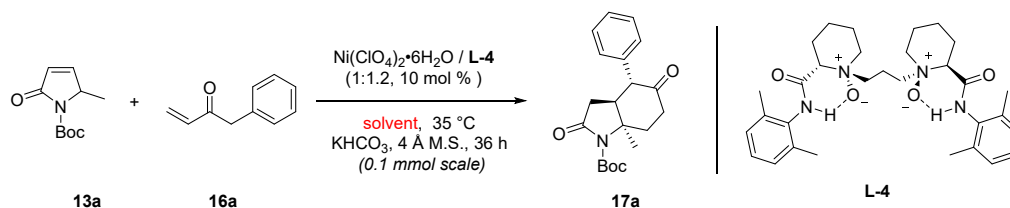

| Entry | Solvent            | Yield (%) | ee (%) |
|-------|--------------------|-----------|--------|
| 1     | CH <sub>3</sub> CN | 71        | 65     |
| 2     | DCM                | 68        | 36     |
| 3     | CH <sub>3</sub> Cl | 56        | 72     |
| 4     | 1,2-DCE            | 50        | 82     |
| 5     | THF                | 68        | 73     |
| 6     | 1,4-dioxane        | 32        | 54     |
| 7     | EtOAc              | 47        | 82     |
| 8     | Acetone            | 65        | 69     |

[a] Unless noted otherwise, reactions performed using 1.0 equiv of **13a** (0.1 mmol, 0.2 M), 1.2 equiv of **16a**, 1.0 equiv of  $\text{KHCO}_3$ , 10 mmol % catalyst, and 20 mg 4 Å M.S. at 35 °C for 36 h.

**Table S7.** The screening of *N, N'*-dioxide ligands<sup>[a]</sup>

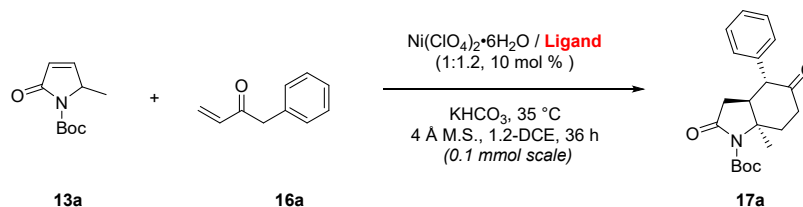

| Entry | Ligand     | Yield (%) | ee (%) |
|-------|------------|-----------|--------|
| 1     | <b>L-1</b> | 83        | 83     |
| 2     | <b>L-2</b> | 29        | 84     |
| 3     | <b>L-3</b> | 38        | 35     |
| 4     | <b>L-4</b> | 50        | 82     |
| 5     | <b>L-5</b> | 65        | 74     |
| 6     | <b>L-6</b> | 38        | 35     |
| 7     | <b>L-7</b> | 24        | 35     |
| 8     | <b>L-8</b> | 47        | 83     |
| 9     | <b>L-9</b> | Trace     | —      |

[a] Unless noted otherwise, reactions performed using 1.0 equiv of **13a** (0.1 mmol, 0.2 M), 1.2 equiv of **16a**, 1.0 equiv of  $\text{KHCO}_3$ , 10 mmol % catalyst, and 20 mg 4 Å M.S. at 35 °C in 1,2-DCE for 36 h.

### 3. Preparation of Substrates

#### 3.1 Preparation of Unsaturated *N*-Boc- $\gamma$ -lactam

The starting substrate **S4** was prepared from pyrrole **S1** following the reported literature<sup>[1]</sup> procedure in a three steps sequence:

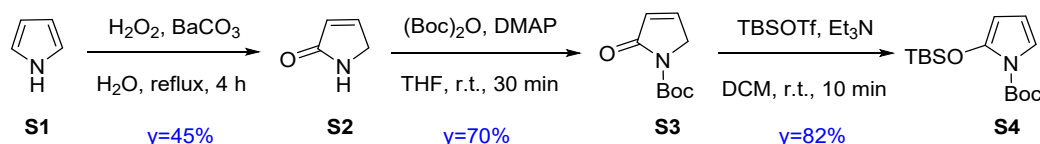

#### General procedure A (Preparation of **13a-13c**, **13e**):

The unsaturated *N*-Boc- $\gamma$ -lactams **13a-13c**, **13e** were prepared from **S4** with the corresponding iodide **S5** by the following procedure:

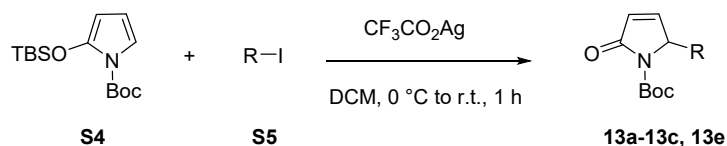

To a solution of **S4** (1.0 equiv.) in anhydrous  $\text{CH}_2\text{Cl}_2$  (0.25 M) cooled to  $0\text{ }^\circ\text{C}$  in an ice-bath, the corresponding iodide **S5** (1.5 equiv.) was added under argon atmosphere. After 10 min,  $\text{CF}_3\text{CO}_2\text{Ag}$  (1.5 equiv.) was added in one portion, and the reaction mixture was allowed to warm to room temperature and stirred for 1 h. After reaction completion, the mixture was filtered through Celite<sup>®</sup> and washed with EtOAc. The filtrate was then concentrated under reduced pressure to give a residue which was purified by silica gel chromatography.

Preparation of **13f**:

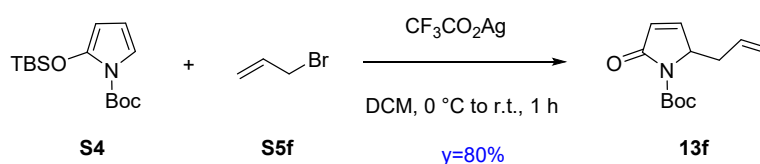

Similar to general procedure A, **13f** was prepared from **S4** with allyl bromide **S5f** in 10.0 mmol scale. The crude residue was purified by silica gel chromatography (PE/EA=8/1) to afford the pure product as a brown oil (1.78 g, 80% yield).

Preparation of **13d**:

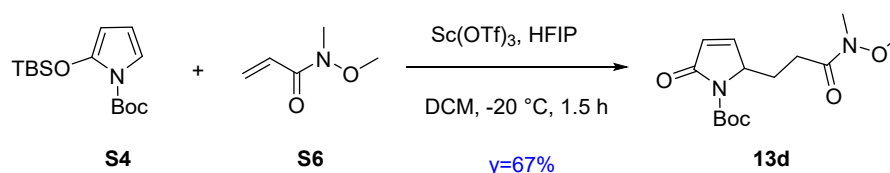

<sup>1</sup> (a) Bocchi, V.; Chierici, L.; Gardini, G. P.; Mondelli, R. *Tetrahedron* **1970**, *26*, 4073-4082.  
(b) Casiraghi, G.; Rassu, G.; Spanu, P.; Pinna, L. *J. Org. Chem.* **1992**, *57*, 3760-3763.



To a stirring solution of **S6** (1.38 g, 12.0 mmol) in anhydrous CH<sub>2</sub>Cl<sub>2</sub> (40 mL) was sequentially added Sc(OTf)<sub>3</sub> (492 mg, 1.0 mmol) and HFIP (1,1,1,3,3,3-Hexafluoro-2-propanol, 5.2 mL, 50.0 mmol) at room temperature. The solution was cooled to -20 °C under argon atmosphere and then a solution of **S4** (2.97 g, 10.0 mmol) in 10 mL of dry DCM was added slowly dropwise over 10 min via syringe. After being stirred at the same temperature for 1.5 h, the reaction was quenched with H<sub>2</sub>O and extracted with DCM. The combined organic layers were washed with brine, dried, filtrated and concentrated. The residue was purified by silica gel chromatography (PE/EA=1/1) to give **13d** as a white solid (2.00 g, 67% yield).

**tert-butyl 2-methyl-5-oxo-2,5-dihydro-1H-pyrrole-1-carboxylate (13a)**

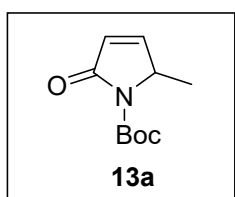

R<sub>f</sub> = 0.5 (hexanes:EtOAc, 1:1), white solid (985 mg, 50% yield in 10.0 mmol scale).

<sup>1</sup>H NMR (500 MHz, Chloroform-*d*) δ 7.09 (dd, *J* = 6.1, 1.9 Hz, 1H), 6.06 (dd, *J* = 6.1, 1.5 Hz, 1H), 4.64 – 4.58 (m, 1H), 1.55 (s, 9H), 1.43 (d, *J* = 6.7 Hz, 3H).

<sup>13</sup>C NMR (126 MHz, Chloroform-*d*) δ 168.9, 151.7, 149.4, 125.9, 82.8, 58.4, 28.2, 18.1.

HRMS (ESI): C<sub>10</sub>H<sub>16</sub>NO<sub>3</sub> [M+H]<sup>+</sup> calcd: 198.1125, found: 198.1122.

**tert-butyl 2-ethyl-5-oxo-2,5-dihydro-1H-pyrrole-1-carboxylate (13b)**

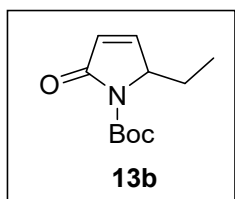

R<sub>f</sub> = 0.3 (hexanes:EtOAc, 2:1), white solid (1.29 g, 61% yield in 10.0 mmol scale).

<sup>1</sup>H NMR (500 MHz, Chloroform-*d*) δ 7.11 (dd, *J* = 6.1, 2.0 Hz, 1H), 6.08 (dd, *J* = 6.1, 1.7 Hz, 1H), 4.60 – 4.53 (m, 1H), 2.06 – 1.96 (m, 1H), 1.86 – 1.78 (m, 1H), 1.53 (s, 9H), 0.82 (t, *J* = 7.5 Hz, 3H).

<sup>13</sup>C NMR (126 MHz, Chloroform-*d*) δ 169.52, 150.2, 149.5, 126.8, 82.8, 63.1,

28.1, 24.3, 7.9.

HRMS (ESI): C<sub>11</sub>H<sub>18</sub>NO<sub>3</sub> [M+H]<sup>+</sup> calcd: 212.1281, found: 212.1276.

**tert-butyl 2-oxo-5-propyl-2,5-dihydro-1H-pyrrole-1-carboxylate (13c)**

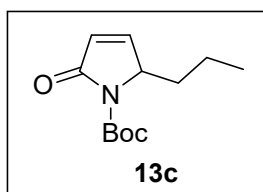

R<sub>f</sub> = 0.3 (hexanes:EtOAc, 2:1), white solid (1.35 g, 60% yield in 10.0 mmol scale).

<sup>1</sup>H NMR (500 MHz, Chloroform-*d*) δ 7.17 (dd, *J* = 6.1, 2.0 Hz, 1H), 6.09 (dd, *J* = 6.1, 1.7 Hz, 1H), 4.63 – 4.57 (m, 1H), 2.05 – 1.97 (m, 1H), 1.75 – 1.66 (m, 1H), 1.56 (s, 9H), 1.37 – 1.24 (m, 2H), 0.95 (t, *J* = 7.4 Hz, 3H).

<sup>13</sup>C NMR (126 MHz, Chloroform-*d*) δ 169.4, 150.5, 149.4, 126.5, 82.9,

62.3, 33.6, 28.2, 17.5, 14.1.

HRMS (ESI): C<sub>12</sub>H<sub>20</sub>NO<sub>3</sub> [M+H]<sup>+</sup> calcd: 226.1438, found: 226.1438.

**tert-butyl 2-(2-(1,3-dioxolan-2-yl)ethyl)-5-oxo-2,5-dihydro-1H-pyrrole-1-carboxylate (13e)**

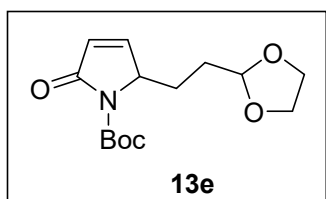

R<sub>f</sub> = 0.4 (hexanes:EtOAc, 2:1), yellow oil (1.75 g, 62% yield in 10.0 mmol scale).

<sup>1</sup>H NMR (500 MHz, Chloroform-*d*) δ 7.13 (d, *J* = 6.2 Hz, 1H), 6.07 (d, *J* = 5.7 Hz, 1H), 4.87 – 4.80 (m, 1H), 4.69 – 4.61 (m, 1H), 3.96 –

3.88 (m, 2H), 3.85 – 3.78 (m, 2H), 2.17 – 2.07 (m, 1H), 1.96 – 1.82 (m, 1H), 1.67 – 1.54 (m, 2H), 1.54 – 1.51 (m, 9H).

$^{13}\text{C}$  NMR (126 MHz, Chloroform-*d*)  $\delta$  169.3, 150.1, 149.3, 126.9, 103.7, 82.9, 65.0, 64.9, 61.8, 28.1, 25.5.

HRMS (ESI):  $\text{C}_{14}\text{H}_{21}\text{NNaO}_5$   $[\text{M}+\text{Na}]^+$  calcd: 306.1312, found: 306.1307.

#### *tert*-butyl 2-allyl-5-oxo-2,5-dihydro-1*H*-pyrrole-1-carboxylate (**13f**)

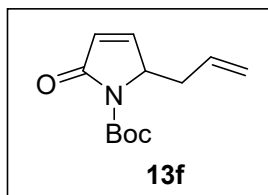

$R_f$  = 0.3 (hexanes:EtOAc, 4:1), brown oil (1.78 g, 80% yield in 10.0 mmol scale).

$^1\text{H}$  NMR (500 MHz, Chloroform-*d*)  $\delta$  7.12 (dd,  $J$  = 6.1, 2.1 Hz, 1H), 6.08 (dd,  $J$  = 6.3, 1.7 Hz, 1H), 5.69 – 5.55 (m, 1H), 5.16 – 5.04 (m, 2H), 4.66 – 4.57 (m, 1H), 2.81 – 2.73 (m, 1H), 2.51 – 2.42 (m, 1H), 1.55 (s, 9H).

$^{13}\text{C}$  NMR (126 MHz, Chloroform-*d*)  $\delta$  169.2, 150.0, 149.4, 131.1, 126.8, 119.6, 82.9, 61.7, 35.7, 28.1.

HRMS (ESI):  $\text{C}_{12}\text{H}_{18}\text{NO}_3$   $[\text{M}+\text{H}]^+$  calcd: 224.1281, found: 224.1278.

#### *tert*-butyl 2-(3-(methoxy(methyl)amino)-3-oxopropyl)-5-oxo-2,5-dihydro-1*H*-pyrrole-1-carboxylate (**13d**)

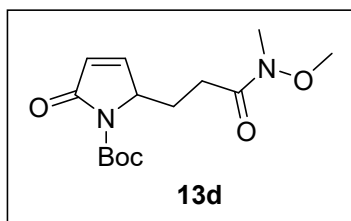

$R_f$  = 0.1 (hexanes:EtOAc, 1:1), white solid (2.00 g, 67% yield in 10.0 mmol scale).

$^1\text{H}$  NMR (500 MHz, Chloroform-*d*)  $\delta$  7.12 (dd,  $J$  = 6.0, 2.1 Hz, 1H), 6.07 (dd,  $J$  = 6.2, 1.8 Hz, 1H), 4.80 – 4.67 (m, 1H), 3.62 (s, 3H), 3.13 (s, 3H), 2.39 – 2.20 (m, 4H), 1.54 (s, 9H).

$^{13}\text{C}$  NMR (126 MHz, Chloroform-*d*)  $\delta$  173.1, 169.3, 150.1, 149.4, 126.7, 83.1, 61.6, 61.3, 32.3, 28.1, 25.7, 25.7.

HRMS (ESI):  $\text{C}_{14}\text{H}_{23}\text{N}_2\text{O}_5$   $[\text{M}+\text{H}]^+$  calcd: 299.1601, found: 299.1599.

## 3.2 Preparation of other unsaturated *N*-protecting- $\gamma$ -lactam

### General procedure B (Preparation of **13j**-**13n**)

The unsaturated *N*-protecting- $\gamma$ -lactams **13j**-**13n** were prepared from pyrrolidone **S7** for four steps by the following procedure <sup>[2]</sup>:

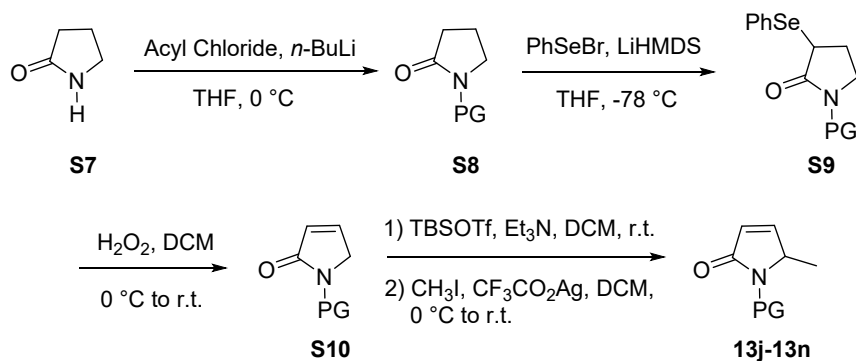

<sup>2</sup> Curti C, Ranieri B, Battistini L, et al. *Adv. Synth. Catal.* **2010**, 352, 2011-2022.

To a solution of **S7** (1.0 equiv.) in anhydrous THF (0.25 M), *n*-BuLi (1.1 equiv.) was added under argon atmosphere at 0 °C. The resulting solution was stirred at the same temperature for 1 h, then the corresponding Acyl Chloride (1.1 equiv.) was added. The reaction mixture was stirred for 1 h, then allowed to warm to room temperature until reaction completion as monitored by TLC. The mixture was quenched with a saturated aqueous solution of NH<sub>4</sub>Cl and extracted with EtOAc. The combined organic layers were washed with brine, dried, filtrated and concentrated. The crude material was purified by silica gel chromatography eluted with petroleum ether/EtOAc to afford product **S8**.

To a solution of **S8** (1.0 equiv.) and PhSeBr (1.1 equiv.) in anhydrous THF (0.10 M), LiHMDS (1.1 equiv.) was added slowly dropwise over 10 min via syringe under argon atmosphere at -78 °C. After being stirred for 1.5 h, the reaction was quenched with aqueous 1.0 M HCl at the same temperature and then warmed to room temperature extracted with EtOAc. The combined organic layers were washed with brine, dried, filtrated and concentrated. The crude material was purified by silica gel chromatography eluted with petroleum ether/EtOAc to afford product **S9**.

30% aqueous H<sub>2</sub>O<sub>2</sub> (4.0 equiv.) was added to a solution of **S9** (1.0 equiv.) in DCM (0.20 M) in an ice-bath. The resulting solution was stirred at room temperature for 1 h, then quenched with a saturated aqueous solution of Na<sub>2</sub>S<sub>2</sub>O<sub>3</sub> and extracted with DCM. The combined organic layers were washed with brine, dried, filtrated and concentrated. The crude material was purified by silica gel chromatography eluted with petroleum ether/EtOAc to afford product **S10**.

To a solution of **S10** (1.0 equiv.) and Et<sub>3</sub>N (1.2 equiv.) in anhydrous DCM (0.10 M), TBSOTf (1.05 equiv.) was added at 0 °C in an ice-bath. After being stirred for 30 min, the reaction mixture was directly concentrated under reduced pressure and pumped for another 2 h on the vacuum pump. The crude silyl dienol ether product was directly used to the next step without further purification. To a solution of the resulting crude residue in anhydrous CH<sub>2</sub>Cl<sub>2</sub> (0.25 M) cooled to 0 °C in an ice-bath, CH<sub>3</sub>I (2.0 equiv.) was added under argon atmosphere. After 10 min, CF<sub>3</sub>CO<sub>2</sub>Ag (2.0 equiv.) was added in one portion, and the reaction mixture was allowed to warm to room temperature and stirred for 1 h. After reaction completion, the mixture was filtered through Celite® and washed with EtOAc. The filtrate was concentrated under reduced pressure to give a residue and then purified by silica gel chromatography eluted with petroleum ether/EtOAc to afford product **13j-13n**.

#### benzyl 2-methyl-5-oxo-2,5-dihydro-1H-pyrrole-1-carboxylate (**13j**)

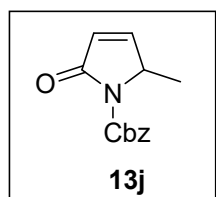

R<sub>f</sub> = 0.3 (hexanes:EtOAc, 2:1), white solid (356 mg, 22% yield in 7.0 mmol scale).

<sup>1</sup>H NMR (500 MHz, Chloroform-*d*) δ 7.44 (d, *J* = 6.8 Hz, 2H), 7.36 (t, 2H), 7.32 (d, *J* = 7.2 Hz, 1H), 7.13 (dd, *J* = 6.1, 2.1 Hz, 1H), 6.06 (dd, *J* = 6.1, 1.7 Hz, 1H), 5.37 – 5.28 (m, 2H), 4.72 – 4.61 (m, 1H), 1.43 (d, *J* = 6.8 Hz, 3H).

<sup>13</sup>C NMR (126 MHz, Chloroform-*d*) δ 168.5, 152.4, 150.9, 135.4, 128.6, 128.3, 128.1, 125.7, 67.9, 58.5, 18.1.

HRMS (ESI): C<sub>13</sub>H<sub>14</sub>NO<sub>3</sub> [M+H]<sup>+</sup> calcd: 232.0968, found: 232.0968.

#### (3*r*)-adamantan-1-yl 2-methyl-5-oxo-2,5-dihydro-1H-pyrrole-1-carboxylate (**13k**)

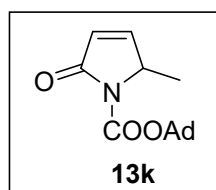

R<sub>f</sub> = 0.5 (hexanes:EtOAc, 2:1), white solid (701 mg, 51% yield in 5.0 mmol scale).

**<sup>1</sup>H NMR** (500 MHz, Chloroform-*d*)  $\delta$  7.10 (dd,  $J$  = 5.9, 1.9 Hz, 1H), 6.08 – 6.03 (m, 1H), 4.65 – 4.58 (m, 1H), 2.23 – 2.19 (m, 9H), 1.71 – 1.67 (m, 6H), 1.44 (d,  $J$  = 6.8 Hz, 3H).

**<sup>13</sup>C NMR** (126 MHz, Chloroform-*d*)  $\delta$  169.2, 151.8, 148.9, 125.9, 82.9, 58.5, 41.4, 36.1, 31.0, 18.2.

**HRMS** (ESI): C<sub>16</sub>H<sub>21</sub>NNaO<sub>3</sub> [M+Na]<sup>+</sup> calcd: 298.1414, found: 298.1413.

#### 5-methyl-1-tosyl-1,5-dihydro-2H-pyrrol-2-one (13l)

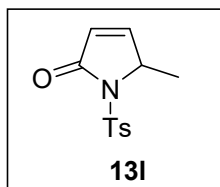

R<sub>f</sub> = 0.6 (hexanes:EtOAc, 2:1), white solid (138 mg, 11% yield in 5.0 mmol scale).

**<sup>1</sup>H NMR** (500 MHz, Chloroform-*d*)  $\delta$  7.95 (d,  $J$  = 8.0 Hz, 2H), 7.32 (d,  $J$  = 8.0 Hz, 2H), 7.13 (dd,  $J$  = 6.0, 2.1 Hz, 1H), 5.97 (dd,  $J$  = 6.0, 1.7 Hz, 1H), 4.87 (qt,  $J$  = 6.8, 1.8 Hz, 1H), 2.42 (s, 3H), 1.57 (d,  $J$  = 6.8 Hz, 3H).

**<sup>13</sup>C NMR** (126 MHz, Chloroform-*d*)  $\delta$  168.6, 153.2, 145.0, 136.2, 129.6, 128.0, 125.1, 60.5, 21.7, 19.1.

**HRMS** (ESI): C<sub>12</sub>H<sub>14</sub>NO<sub>3</sub>S [M+H]<sup>+</sup> calcd: 252.0689, found: 252.0691.

#### methyl 2-methyl-5-oxo-2,5-dihydro-1H-pyrrole-1-carboxylate (13m)

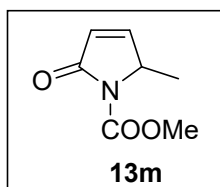

R<sub>f</sub> = 0.3 (hexanes:EtOAc, 1:1), white solid (240 mg, 31% yield in 5.0 mmol scale).

**<sup>1</sup>H NMR** (500 MHz, Chloroform-*d*)  $\delta$  7.15 (dd,  $J$  = 6.1, 2.0 Hz, 1H), 6.06 (dd,  $J$  = 6.0, 1.7 Hz, 1H), 4.67 (qt,  $J$  = 6.8, 1.9 Hz, 1H), 3.89 (s, 3H), 1.44 (d,  $J$  = 6.8 Hz, 3H).

**<sup>13</sup>C NMR** (126 MHz, Chloroform-*d*)  $\delta$  168.6, 152.6, 151.7, 125.7, 58.6, 53.5, 18.0.

**HRMS** (ESI): C<sub>7</sub>H<sub>10</sub>NO<sub>3</sub> [M+H]<sup>+</sup> calcd: 156.0655, found: 156.0658.

#### *N,N*,2-trimethyl-5-oxo-2,5-dihydro-1H-pyrrole-1-carboxamide (13n)

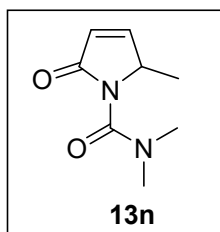

R<sub>f</sub> = 0.1 (hexanes:EtOAc, 1:1), white solid (294 mg, 35% yield in 5.0 mmol scale).

**<sup>1</sup>H NMR** (500 MHz, Chloroform-*d*)  $\delta$  7.12 (dd,  $J$  = 5.9, 1.8 Hz, 1H), 5.96 (dd,  $J$  = 5.9, 1.8 Hz, 1H), 4.93 (qt,  $J$  = 7.0, 1.8 Hz, 1H), 3.01 (s, 6H), 1.30 (d,  $J$  = 7.0 Hz, 3H).

**<sup>13</sup>C NMR** (126 MHz, Chloroform-*d*)  $\delta$  169.2, 153.4, 152.0, 125.2, 58.3, 38.6, 36.9, 17.3.

**HRMS** (ESI): C<sub>8</sub>H<sub>13</sub>N<sub>2</sub>O<sub>2</sub> [M+H]<sup>+</sup> calcd: 169.0972, found: 169.0969.

#### benzyl 2-oxopyrrolidine-1-carboxylate (S8j)

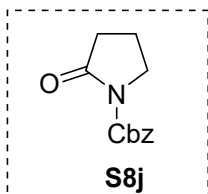

R<sub>f</sub> = 0.5 (hexanes:EtOAc, 1:1), white solid (6.13 g, 56% yield in 50.0 mmol scale).

**<sup>1</sup>H NMR** (500 MHz, Chloroform-*d*)  $\delta$  7.42 (d,  $J$  = 6.7 Hz, 2H), 7.38 – 7.30 (m, 3H), 5.27 (s, 2H), 3.80 (t,  $J$  = 7.2 Hz, 2H), 2.57 – 2.45 (m, 2H), 2.07 – 1.95 (m, 2H).

**<sup>13</sup>C NMR** (126 MHz, Chloroform-*d*)  $\delta$  174.0, 151.5, 135.4, 128.6, 128.4, 128.2,

68.0, 46.4, 32.8, 17.6.

**HRMS** (ESI): C<sub>12</sub>H<sub>14</sub>NO<sub>3</sub> [M+H]<sup>+</sup> calcd: 220.0968, found: 220.0965.

#### benzyl 2-oxo-3-(phenylselanyl)pyrrolidine-1-carboxylate (S9j)

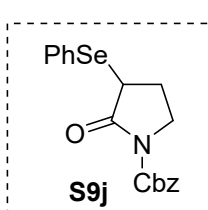

R<sub>f</sub> = 0.3 (hexanes:EtOAc, 4:1), yellow oil (4.21 g, 45% yield in 25.0 mmol scale).

**<sup>1</sup>H NMR** (500 MHz, Chloroform-*d*)  $\delta$  7.65 (d, *J* = 7.5 Hz, 2H), 7.43 – 7.38 (m, 2H), 7.37 – 7.30 (m, 4H), 7.25 (d, *J* = 8.2 Hz, 2H), 5.25 (s, 2H), 3.96 – 3.90 (m, 1H), 3.71 – 3.65 (m, 1H), 3.50 – 3.44 (m, 1H), 2.52 – 2.43 (m, 1H), 2.11 – 2.04 (m, 1H).

**<sup>13</sup>C NMR** (126 MHz, Chloroform-*d*)  $\delta$  172.3, 151.4, 135.9, 135.3, 129.3, 129.0, 128.6, 128.4, 128.2, 126.7, 68.1, 44.8, 41.6, 26.1.

**HRMS** (ESI): C<sub>18</sub>H<sub>18</sub>NO<sub>3</sub>Se [M+H]<sup>+</sup> calcd: 376.0446, found: 376.0449.

#### benzyl 2-oxo-2,5-dihydro-1*H*-pyrrole-1-carboxylate (S10j)

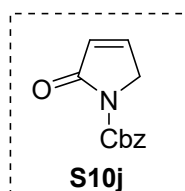

R<sub>f</sub> = 0.2 (hexanes:EtOAc, 2:1), white solid (1.87 g, 86% yield in 10.0 mmol scale).

**<sup>1</sup>H NMR** (500 MHz, Chloroform-*d*)  $\delta$  7.45 (d, *J* = 6.6 Hz, 2H), 7.40 – 7.31 (m, 3H), 7.23 (dt, *J* = 6.2, 2.1 Hz, 1H), 6.18 (dt, *J* = 6.1, 2.0 Hz, 1H), 5.33 (s, 2H), 4.41 (t, *J* = 2.1 Hz, 2H).

**<sup>13</sup>C NMR** (126 MHz, Chloroform-*d*)  $\delta$  168.7, 150.9, 145.7, 135.3, 128.6, 128.5, 128.3, 127.7, 68.1, 51.6.

**HRMS** (ESI): C<sub>12</sub>H<sub>12</sub>NO<sub>3</sub> [M+H]<sup>+</sup> calcd: 218.0812, found: 218.0809.

#### (3*r*)-adamantan-1-yl 2-oxopyrrolidine-1-carboxylate (S8k)

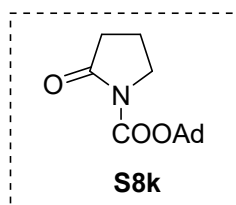

R<sub>f</sub> = 0.3 (hexanes:EtOAc, 2:1), white solid (9.07 g, 69% yield in 50.0 mmol scale).

**<sup>1</sup>H NMR** (500 MHz, Chloroform-*d*)  $\delta$  3.77 (t, *J* = 7.2 Hz, 2H), 2.54 (t, *J* = 8.1 Hz, 2H), 2.25 – 2.17 (m, 9H), 2.06 – 1.97 (m, 2H), 1.73 – 1.67 (m, 6H).

**<sup>13</sup>C NMR** (126 MHz, Chloroform-*d*)  $\delta$  174.3, 149.8, 82.7, 46.5, 41.3, 36.1, 33.0, 31.0, 17.4.

**HRMS** (ESI): C<sub>15</sub>H<sub>22</sub>NO<sub>3</sub> [M+H]<sup>+</sup> calcd: 264.1594, found: 264.1588.

#### (3*r*)-adamantan-1-yl 2-oxo-3-(phenylselanyl)pyrrolidine-1-carboxylate (S9k)

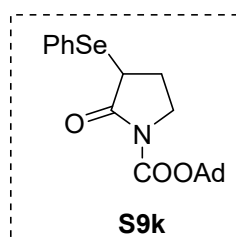

R<sub>f</sub> = 0.5 (hexanes:EtOAc, 3:1), colorless oil (15.88 g, 76% yield in 30.0 mmol scale).

**<sup>1</sup>H NMR** (500 MHz, Chloroform-*d*)  $\delta$  7.67 (d, *J* = 7.5 Hz, 2H), 7.35 (t, 1H), 7.29 (t, *J* = 7.4 Hz, 2H), 3.96 – 3.91 (m, 1H), 3.64 – 3.58 (m, 1H), 3.45 – 3.39 (m, 1H), 2.50 – 2.40 (m, 1H), 2.21 – 2.17 (m, 2H), 2.16 – 2.13 (m, 6H), 2.11 – 2.00 (m, 2H), 1.68 – 1.64 (m, 6H).

**<sup>13</sup>C NMR** (126 MHz, Chloroform-*d*)  $\delta$  172.5, 149.5, 135.8, 129.2, 128.8, 127.0, 83.0, 44.8, 42.1, 41.3, 36.1, 31.0, 26.1.

**HRMS** (ESI): C<sub>21</sub>H<sub>26</sub>NO<sub>3</sub>Se [M+H]<sup>+</sup> calcd: 420.1072, found: 420.1069.

#### (3*r*)-adamantan-1-yl 2-oxo-2,5-dihydro-1*H*-pyrrole-1-carboxylate (S10k)

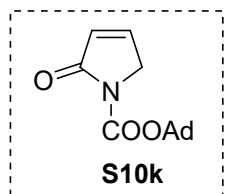

R<sub>f</sub> = 0.2 (hexanes:EtOAc, 2:1), white solid (4.70 g, 90% yield in 20.0 mmol scale).

**<sup>1</sup>H NMR** (500 MHz, Chloroform-*d*)  $\delta$  7.18 (dt, *J* = 6.2 Hz, 1H), 6.15 (dt, *J* = 6.2 Hz, 1H), 4.36 – 4.33 (m, 2H), 2.23 – 2.19 (m, 9H), 1.70 – 1.66 (m, 6H).

**<sup>13</sup>C NMR** (126 MHz, Chloroform-*d*)  $\delta$  169.1, 149.1, 145.1, 128.0, 82.9, 51.7, 41.4, 36.1, 31.0.

**HRMS** (ESI): C<sub>15</sub>H<sub>20</sub>NO<sub>3</sub> [M+H]<sup>+</sup> calcd: 262.1438, found: 262.1435.

### 1-tosylpyrrolidin-2-one (S8I)

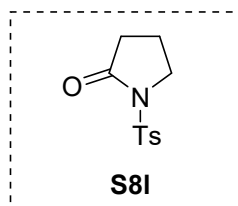

$R_f = 0.1$  (hexanes:EtOAc, 4:1), white solid (9.44 g, 79% yield in 50.0 mmol scale).

$^1\text{H NMR}$  (500 MHz, Chloroform-*d*)  $\delta$  7.91 (d,  $J = 8.1$  Hz, 2H), 7.32 (d,  $J = 8.1$  Hz, 2H), 3.88 (t,  $J = 7.1$  Hz, 2H), 2.42 (s, 3H), 2.42 – 2.38 (m, 2H), 2.06 (p,  $J = 7.6$  Hz, 2H).

$^{13}\text{C NMR}$  (126 MHz, Chloroform-*d*)  $\delta$  173.4, 145.2, 135.2, 129.7, 128.1, 47.3,

32.3, 21.7, 18.2.

**HRMS** (ESI):  $\text{C}_{11}\text{H}_{14}\text{NO}_3\text{S}$   $[\text{M}+\text{H}]^+$  calcd: 240.0689, found: 240.0690.

### 3-(phenylselanyl)-1-tosylpyrrolidin-2-one (S9I)

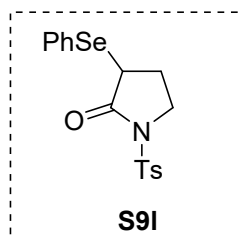

$R_f = 0.2$  (hexanes:EtOAc, 4:1), colorless oil (4.49 g, 38% yield in 30.0 mmol scale).

$^1\text{H NMR}$  (500 MHz, Chloroform-*d*)  $\delta$  7.91 (d,  $J = 8.4$  Hz, 2H), 7.42 (d,  $J = 6.6$  Hz, 2H), 7.35 (d,  $J = 8.1$  Hz, 2H), 7.31 (t,  $J = 7.4$  Hz, 1H), 7.20 (t,  $J = 7.7$  Hz, 2H), 3.85 – 3.78 (m, 2H), 3.61 – 3.53 (m, 1H), 2.54 – 2.47 (m, 1H), 2.46 (s, 3H), 2.08 – 2.01 (m, 1H).

$^{13}\text{C NMR}$  (126 MHz, Chloroform-*d*)  $\delta$  171.6, 145.3, 136.1, 134.8, 129.7, 129.3, 129.1, 128.3, 126.1, 45.7, 40.7, 26.3, 21.8.

**HRMS** (ESI):  $\text{C}_{17}\text{H}_{18}\text{NO}_3\text{SSe}$   $[\text{M}+\text{H}]^+$  calcd: 396.0167, found: 396.0160.

### 1-tosyl-1,5-dihydro-2H-pyrrol-2-one (S10I)

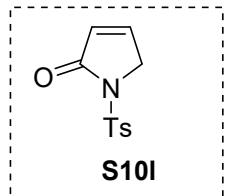

$R_f = 0.3$  (hexanes:EtOAc, 2:1), white solid (4.46 g, 94% yield in 20.0 mmol scale).

$^1\text{H NMR}$  (500 MHz, Chloroform-*d*)  $\delta$  7.94 (d,  $J = 8.3$  Hz, 2H), 7.33 (d,  $J = 8.0$  Hz, 2H), 7.24 (dt,  $J = 6.1, 2.0$  Hz, 1H), 6.05 (dt,  $J = 6.1, 2.0$  Hz, 1H), 4.48 (t,  $J = 2.1$  Hz, 2H), 2.42 (s, 3H).

$^{13}\text{C NMR}$  (126 MHz, Chloroform-*d*)  $\delta$  168.4, 146.6, 145.2, 135.3, 129.8, 128.0, 127.1, 52.4, 21.7.

**HRMS** (ESI):  $\text{C}_{11}\text{H}_{12}\text{NO}_3\text{S}$   $[\text{M}+\text{H}]^+$  calcd: 238.0532, found: 238.0529.

### methyl 2-oxopyrrolidine-1-carboxylate (S8m)

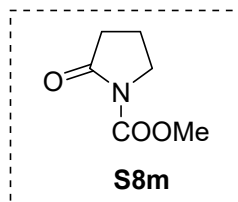

$R_f = 0.3$  (hexanes:EtOAc, 1:1), white solid (4.08 g, 57% yield in 50.0 mmol scale).

$^1\text{H NMR}$  (500 MHz, Chloroform-*d*)  $\delta$  3.83 – 3.79 (m, 3H), 3.77 (t,  $J = 7.2$  Hz, 2H), 2.50 (t,  $J = 8.1$  Hz, 2H), 2.01 (p,  $J = 7.9$  Hz, 2H).

$^{13}\text{C NMR}$  (126 MHz, Chloroform-*d*)  $\delta$  174.0, 152.3, 53.5, 46.5, 32.8, 17.6.

**HRMS** (ESI):  $\text{C}_6\text{H}_{10}\text{NO}_3$   $[\text{M}+\text{H}]^+$  calcd: 144.0655, found: 144.0658.

### methyl 2-oxo-3-(phenylselanyl)pyrrolidine-1-carboxylate (S9m)

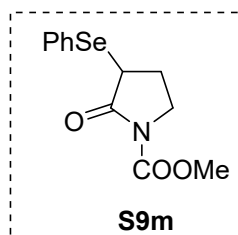

$R_f = 0.1$  (hexanes:EtOAc, 4:1), colorless oil (4.29 g, 48% yield in 30.0 mmol scale).

$^1\text{H NMR}$  (500 MHz, Chloroform-*d*)  $\delta$  7.61 (d,  $J = 6.8$  Hz, 2H), 7.29 (t,  $J = 7.4$  Hz, 1H), 7.24 (t,  $J = 6.8$  Hz, 2H), 3.96 – 3.87 (m, 1H), 3.78 (s, 3H), 3.68

– 3.62 (m, 1H), 3.51 – 3.44 (m, 1H), 2.48 – 2.39 (m, 1H), 2.07 – 1.99 (m, 1H).

$^{13}\text{C}$  NMR (126 MHz, Chloroform-*d*)  $\delta$  172.3, 152.1, 135.9, 135.8, 129.3, 129.0, 126.8, 53.6, 44.8, 41.6, 26.0.

HRMS (ESI):  $\text{C}_{12}\text{H}_{14}\text{NO}_3\text{Se}$   $[\text{M}+\text{H}]^+$  calcd: 300.0133, found: 300.0130.

#### methyl 2-oxo-2,5-dihydro-1H-pyrrole-1-carboxylate (S10m)

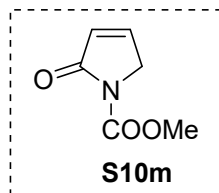

$R_f$  = 0.1 (hexanes:EtOAc, 1:1), white solid (1.47 g, 52% yield in 20.0 mmol scale).

$^1\text{H}$  NMR (500 MHz, Chloroform-*d*)  $\delta$  7.25 (d,  $J$  = 6.1 Hz, 1H), 6.18 (d,  $J$  = 6.1 Hz, 1H), 4.41 (s, 2H), 3.90 (s, 3H).

$^{13}\text{C}$  NMR (126 MHz, Chloroform-*d*)  $\delta$  168.6, 151.7, 145.8, 127.7, 53.6, 51.6.

HRMS (ESI):  $\text{C}_6\text{H}_8\text{NO}_3$   $[\text{M}+\text{H}]^+$  calcd: 142.0499, found: 142.0503.

#### *N,N*-dimethyl-2-oxopyrrolidine-1-carboxamide (S8n)

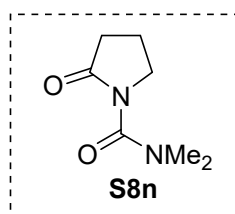

$R_f$  = 0.1 (hexanes:EtOAc, 1:1), white solid (3.35 g, 43% yield in 50.0 mmol scale).

$^1\text{H}$  NMR (500 MHz, Chloroform-*d*)  $\delta$  3.70 (t,  $J$  = 7.0 Hz, 2H), 2.96 (s, 6H), 2.42 (t,  $J$  = 8.0 Hz, 2H), 2.04 (p,  $J$  = 7.5 Hz, 2H).

$^{13}\text{C}$  NMR (126 MHz, Chloroform-*d*)  $\delta$  174.3, 154.7, 46.9, 38.4, 36.7, 32.1, 18.5.

HRMS (ESI):  $\text{C}_7\text{H}_{13}\text{N}_2\text{O}_2$   $[\text{M}+\text{H}]^+$  calcd: 157.0972, found: 157.0976.

#### *N,N*-dimethyl-2-oxo-3-(phenylselanyl)pyrrolidine-1-carboxamide (S9n)

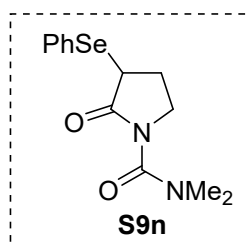

$R_f$  = 0.3 (hexanes:EtOAc, 1:1), yellow solid (7.09 g, 76% yield in 30.0 mmol scale).

$^1\text{H}$  NMR (500 MHz, Chloroform-*d*)  $\delta$  7.69 – 7.63 (m, 2H), 7.36 – 7.27 (m, 3H), 3.94 (dd,  $J$  = 8.4, 5.7 Hz, 1H), 3.75 – 3.68 (m, 1H), 3.62 – 3.55 (m, 1H), 2.94 (s, 6H), 2.59 – 2.48 (m, 1H), 2.17 – 2.07 (m, 1H).

$^{13}\text{C}$  NMR (126 MHz, Chloroform-*d*)  $\delta$  172.4, 154.3, 135.7, 129.3, 128.7, 127.2, 45.2, 41.4, 38.5, 37.0, 26.9.

HRMS (ESI):  $\text{C}_{13}\text{H}_{17}\text{N}_2\text{O}_2\text{Se}$   $[\text{M}+\text{H}]^+$  calcd: 313.0450, found: 313.0453.

#### *N,N*-dimethyl-2-oxo-2,5-dihydro-1H-pyrrole-1-carboxamide (S10n)

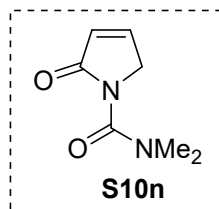

$R_f$  = 0.1 (hexanes:EtOAc, 1:1), white solid (2.65 g, 86% yield in 20.0 mmol scale).

$^1\text{H}$  NMR (500 MHz, Chloroform-*d*)  $\delta$  7.25 (dt,  $J$  = 5.9, 1.4 Hz, 1H), 6.06 (dt,  $J$  = 6.0, 2.0 Hz, 1H), 4.45 (t,  $J$  = 1.9 Hz, 2H), 3.02 (s, 6H).

$^{13}\text{C}$  NMR (126 MHz, Chloroform-*d*)  $\delta$  169.8, 154.0, 146.4, 126.6, 51.9, 38.3, 37.7.

HRMS (ESI):  $\text{C}_7\text{H}_{11}\text{N}_2\text{O}_2$   $[\text{M}+\text{H}]^+$  calcd: 155.0815, found: 155.0811.

### 3.3 Preparation of benzyl vinyl ketones

#### General procedure C (Preparation of 16)

The benzyl vinyl ketones **16** were prepared from phenylacetic acid **S11** for two steps by the following procedure:

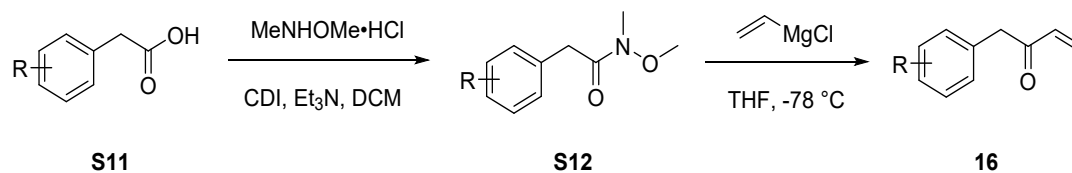

A solution of **S11** (1.0 equiv.) in  $\text{CH}_2\text{Cl}_2$  (0.25 M) was cooled to 0 °C and treated with CDI (1.1 equiv.). After being stirred for 30 min, *N,O*-dimethylhydroxylamine hydrochloride (1.2 equiv.) and TEA (3.2 equiv.) were added subsequently and the mixture was stirred overnight at room temperature. The mixture was quenched with a saturated aqueous solution of  $\text{NH}_4\text{Cl}$  and extracted with EtOAc. The combined organic layers were washed with brine, dried, filtrated and concentrated. The crude material was purified by silica gel chromatography eluted with petroleum ether/EtOAc to afford product **S12**.

To a solution of **S12** (1.0 equiv.) in anhydrous THF (0.25 M), vinylmagnesium chloride (1.5 equiv.) was added slowly via syringe under argon atmosphere at -78 °C. After being stirred overnight, the reaction was quenched with a saturated aqueous solution of  $\text{NH}_4\text{Cl}$  and extracted with EtOAc. The combined organic layers were washed with brine, dried, filtrated and concentrated. The crude material was purified by silica gel chromatography eluted with petroleum ether/EtOAc to afford product **16**.

#### *N*-methoxy-*N*-methyl-2-phenylacetamide (**S12a**)

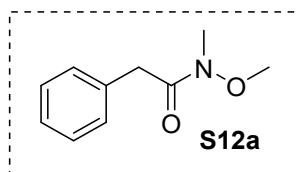

$R_f = 0.2$  (hexanes:EtOAc, 4:1), colorless oil (797 mg, 89% yield in 5.0 mmol scale).

$^1\text{H NMR}$  (500 MHz, Chloroform-*d*)  $\delta$  7.35 – 7.26 (m, 4H), 7.25 – 7.21 (m, 1H), 3.77 (s, 2H), 3.60 (s, 3H), 3.19 (s, 3H).

$^{13}\text{C NMR}$  (126 MHz, Chloroform-*d*)  $\delta$  135.0, 129.3, 128.5, 126.8, 61.3, 39.4, 32.3.

**HRMS** (ESI):  $\text{C}_{10}\text{H}_{14}\text{NO}_2$   $[\text{M}+\text{H}]^+$  calcd: 180.1019, found: 180.1015.

#### 1-phenylbut-3-en-2-one (**16a**)

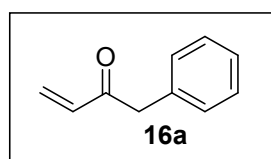

$R_f = 0.2$  (hexanes:EtOAc, 20:1), colorless oil (225 mg, 77% yield in 2.0 mmol scale).

$^1\text{H NMR}$  (500 MHz, Chloroform-*d*)  $\delta$  7.31 (t,  $J = 7.5$  Hz, 2H), 7.25 (t,  $J = 7.4$  Hz, 1H), 7.20 (d,  $J = 6.9$  Hz, 2H), 6.43 – 6.35 (m, 1H), 6.28 (d,  $J = 16.3$  Hz, 1H), 5.79 (d,  $J = 10.4$  Hz, 1H), 3.85 (s, 2H).

$^{13}\text{C NMR}$  (126 MHz, Chloroform-*d*)  $\delta$  197.7, 135.7, 134.1, 129.5, 129.0, 128.8, 127.0, 47.2.

**HRMS** (ESI):  $\text{C}_{10}\text{H}_{11}\text{O}$   $[\text{M}+\text{H}]^+$  calcd: 147.0804, found: 147.0801.

#### *N*-methoxy-*N*-methyl-2-(*o*-tolyl)acetamide (**S12d**)

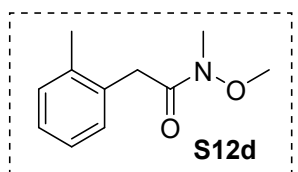

$R_f = 0.2$  (hexanes:EtOAc, 4:1), colorless oil (907 mg, 94% yield in 5.0 mmol scale).

$^1\text{H NMR}$  (500 MHz, Chloroform-*d*)  $\delta$  7.22 – 7.11 (m, 4H), 3.78 (s, 2H), 3.61 (s, 3H), 3.21 (s, 3H), 2.31 (s, 3H).



$^{13}\text{C}$  NMR (126 MHz, Chloroform-*d*)  $\delta$  172.6, 136.8, 133.6, 130.2, 129.9, 127.0, 126.0, 61.2, 37.2, 32.4, 19.7.

HRMS (ESI):  $\text{C}_{11}\text{H}_{16}\text{NO}_2$   $[\text{M}+\text{H}]^+$  calcd: 194.1176, found: 194.1175.

#### 1-(*o*-tolyl)but-3-en-2-one (16d)

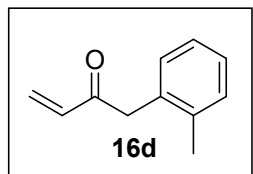

$R_f$  = 0.2 (hexanes:EtOAc, 20:1), colorless oil (179 mg, 56% yield in 2.0 mmol scale).

$^1\text{H}$  NMR (500 MHz, Chloroform-*d*)  $\delta$  7.22 – 7.08 (m, 4H), 6.48 – 6.37 (m, 1H), 6.31 (d,  $J$  = 17.4 Hz, 1H), 5.79 (d,  $J$  = 9.1 Hz, 1H), 3.87 (s, 2H), 2.23 (s, 3H).

$^{13}\text{C}$  NMR (126 MHz, Chloroform-*d*)  $\delta$  197.6, 137.0, 135.4, 132.9, 130.5, 130.5, 128.6, 127.4, 126.2, 45.6, 19.7.

HRMS (ESI):  $\text{C}_{11}\text{H}_{13}\text{NO}$   $[\text{M}+\text{H}]^+$  calcd: 161.0961, found: 161.0959.

#### 2-(2-chlorophenyl)-*N*-methoxy-*N*-methylacetamide (S12e)

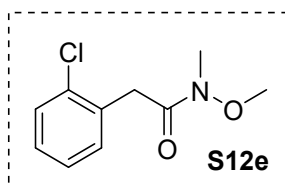

$R_f$  = 0.2 (hexanes:EtOAc, 4:1), colorless oil (1.05 g, 98% yield in 5.0 mmol scale).

$^1\text{H}$  NMR (500 MHz, Chloroform-*d*)  $\delta$  7.39 – 7.35 (m, 1H), 7.31 – 7.27 (m, 1H), 7.24 – 7.18 (m, 2H), 3.91 (s, 2H), 3.69 (s, 3H), 3.22 (s, 3H).

$^{13}\text{C}$  NMR (126 MHz, Chloroform-*d*)  $\delta$  171.4, 134.4, 133.2, 131.4, 129.4, 128.4, 126.9, 61.4, 37.0, 32.4.

HRMS (ESI):  $\text{C}_{10}\text{H}_{13}\text{ClNO}_2$   $[\text{M}+\text{H}]^+$  calcd: 214.0629, found: 214.0629.

#### 1-(2-chlorophenyl)but-3-en-2-one (16e)

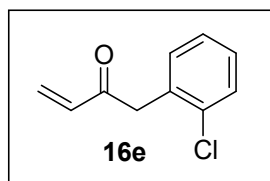

$R_f$  = 0.2 (hexanes:EtOAc, 20:1), colorless oil (170 mg, 47% yield in 2.0 mmol scale).

$^1\text{H}$  NMR (500 MHz, Chloroform-*d*)  $\delta$  7.42 – 7.36 (m, 1H), 7.25 – 7.19 (m, 3H), 6.50 – 6.39 (m, 1H), 6.35 (d,  $J$  = 16.3 Hz, 1H), 5.86 (d,  $J$  = 10.4 Hz, 1H), 4.03 (s, 2H).

$^{13}\text{C}$  NMR (126 MHz, Chloroform-*d*)  $\delta$  196.5, 135.6, 134.5, 132.7, 131.7, 129.6, 129.0, 128.7, 127.0, 44.7.

HRMS (ESI):  $\text{C}_{10}\text{H}_{10}\text{ClO}$   $[\text{M}+\text{H}]^+$  calcd: 181.0415, found: 181.0409.

#### *N*-methoxy-*N*-methyl-2-(*m*-tolyl)acetamide (S12f)

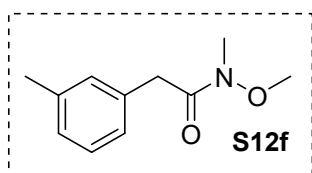

$R_f$  = 0.2 (hexanes:EtOAc, 4:1), colorless oil (753 mg, 78% yield in 5.0 mmol scale).

$^1\text{H}$  NMR (500 MHz, Chloroform-*d*)  $\delta$  7.20 (t,  $J$  = 7.6 Hz, 1H), 7.12 (s, 1H), 7.10 – 7.03 (m, 2H), 3.74 (s, 2H), 3.61 (s, 3H), 3.19 (s, 3H), 2.33 (s, 3H).

$^{13}\text{C}$  NMR (126 MHz, Chloroform-*d*)  $\delta$  172.6, 138.1, 134.8, 130.0, 128.4, 127.6, 126.4, 61.3, 39.3, 32.3, 21.4.

HRMS (ESI):  $\text{C}_{11}\text{H}_{16}\text{NO}_2$   $[\text{M}+\text{H}]^+$  calcd: 194.1176, found: 194.1177.

#### 1-(*m*-tolyl)but-3-en-2-one (16f)

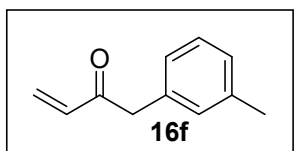

$R_f = 0.2$  (hexanes:EtOAc, 20:1), colorless oil (227 mg, 71% yield in 2.0 mmol scale).

$^1\text{H NMR}$  (500 MHz, Chloroform-*d*)  $\delta$  7.22 (t,  $J = 7.5$  Hz, 1H), 7.08 (d,  $J = 7.6$  Hz, 1H), 7.06 – 6.99 (m, 2H), 6.45 – 6.38 (m, 1H), 6.31 (dd,  $J = 17.6, 1.3$  Hz, 1H), 5.82 (dd,  $J = 10.4, 1.3$  Hz, 1H), 3.84 (s, 2H), 2.34 (s,

3H).

$^{13}\text{C NMR}$  (126 MHz, Chloroform-*d*)  $\delta$  197.9, 138.4, 135.6, 134.0, 130.2, 129.0, 128.7, 127.8, 126.5, 47.2, 21.4.

**HRMS** (ESI):  $\text{C}_{11}\text{H}_{13}\text{O}$   $[\text{M}+\text{H}]^+$  calcd: 161.0961, found: 161.0957.

### 2-(3-chlorophenyl)-*N*-methoxy-*N*-methylacetamide (S12g)

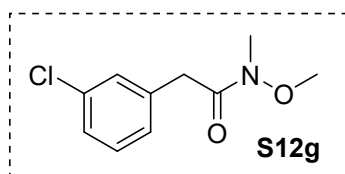

$R_f = 0.2$  (hexanes:EtOAc, 4:1), colorless oil (931 mg, 87% yield in 5.0 mmol scale).

$^1\text{H NMR}$  (500 MHz, Chloroform-*d*)  $\delta$  7.29 (s, 1H), 7.25 – 7.20 (m, 2H), 7.18 (d,  $J = 6.8$  Hz, 1H), 3.74 (s, 2H), 3.63 (s, 3H), 3.19 (s, 3H).

$^{13}\text{C NMR}$  (126 MHz, Chloroform-*d*)  $\delta$  171.6, 136.9, 134.2, 129.7,

129.5, 127.6, 127.0, 61.4, 38.9, 32.3.

**HRMS** (ESI):  $\text{C}_{10}\text{H}_{13}\text{ClNO}_2$   $[\text{M}+\text{H}]^+$  calcd: 214.0629, found: 214.0628.

### 1-(3-chlorophenyl)but-3-en-2-one (16g)

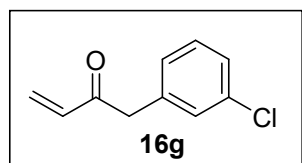

$R_f = 0.2$  (hexanes:EtOAc, 20:1), colorless oil (206 mg, 57% yield in 2.0 mmol scale).

$^1\text{H NMR}$  (500 MHz, Chloroform-*d*)  $\delta$  7.27 – 7.24 (m, 2H), 7.21 (s, 1H), 7.11 – 7.07 (m, 1H), 6.45 – 6.36 (m, 1H), 6.31 (dd,  $J = 17.6, 1.2$  Hz, 1H), 5.87 (dd,  $J = 10.2$  Hz, 1H), 3.85 (s, 2H).

$^{13}\text{C NMR}$  (126 MHz, Chloroform-*d*)  $\delta$  196.9, 135.9, 135.6, 134.5, 129.9, 129.7, 129.4, 127.7, 127.3, 46.4.

**HRMS** (ESI):  $\text{C}_{10}\text{H}_{10}\text{ClO}$   $[\text{M}+\text{H}]^+$  calcd: 181.0415, found: 181.0411.

### *N*-methoxy-*N*-methyl-2-(3-(trifluoromethyl)phenyl)acetamide (S12h)

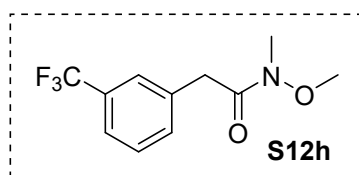

$R_f = 0.2$  (hexanes:EtOAc, 4:1), colorless oil (1.12 g, 91% yield in 5.0 mmol scale).

$^1\text{H NMR}$  (500 MHz, Chloroform-*d*)  $\delta$  7.54 (s, 1H), 7.50 (t,  $J = 8.7$  Hz, 2H), 7.43 (t,  $J = 7.7$  Hz, 1H), 3.82 (s, 2H), 3.65 (s, 3H), 3.20 (s, 3H).

$^{13}\text{C NMR}$  (126 MHz, Chloroform-*d*)  $\delta$  171.5, 135.8, 132.9, 130.8 (q,  $J = 31.8$  Hz), 128.9, 126.3 (q,  $J = 4.0$  Hz), 124.1 (q,  $J = 270.6$  Hz), 123.7 (q,  $J = 4.3$  Hz), 61.3, 39.0, 32.3.

**HRMS** (ESI):  $\text{C}_{11}\text{H}_{13}\text{F}_3\text{NO}_2$   $[\text{M}+\text{H}]^+$  calcd: 248.0893, found: 248.0892.

### 1-(3-(trifluoromethyl)phenyl)but-3-en-2-one (16h)

$R_f = 0.2$  (hexanes:EtOAc, 20:1), colorless oil (244 mg, 57% yield in 2.0 mmol scale).

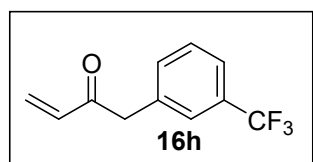

$^1\text{H NMR}$  (500 MHz, Chloroform-*d*)  $\delta$  7.53 (d,  $J = 7.3$  Hz, 1H), 7.49 – 7.42 (m, 2H), 7.40 (d,  $J = 7.4$  Hz, 1H), 6.47 – 6.38 (m, 1H), 6.33 (d,  $J = 17.5$  Hz, 1H), 5.89 (d,  $J = 10.3$  Hz, 1H), 3.95 (s, 2H).

$^{13}\text{C}$  NMR (126 MHz, Chloroform-*d*)  $\delta$  196.7, 135.7, 134.9, 133.0, 131.1 (q,  $J$  = 31.1 Hz), 129.4, 129.1, 126.3 (q,  $J$  = 3.5 Hz), 124.1 (q,  $J$  = 270.6 Hz), 123.9 (q,  $J$  = 3.9 Hz), 46.4.

HRMS (ESI):  $\text{C}_{11}\text{H}_9\text{F}_3\text{NaO}$   $[\text{M}+\text{Na}]^+$  calcd: 237.0498, found: 237.0497.

#### *N*-methoxy-*N*-methyl-2-(*p*-tolyl)acetamide (S12i)

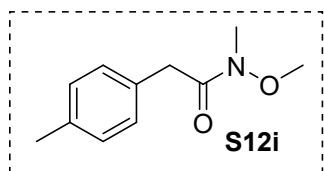

$R_f$  = 0.2 (hexanes:EtOAc, 4:1), colorless oil (917 mg, 95% yield in 5.0 mmol scale).

$^1\text{H}$  NMR (500 MHz, Chloroform-*d*)  $\delta$  7.18 (d,  $J$  = 7.8 Hz, 2H), 7.11 (d,  $J$  = 7.9 Hz, 2H), 3.72 (s, 2H), 3.59 (s, 3H), 3.17 (s, 3H), 2.31 (s, 3H).

$^{13}\text{C}$  NMR (126 MHz, Chloroform-*d*)  $\delta$  172.6, 136.3, 131.9, 129.2, 129.2, 61.3, 39.0, 32.3, 21.1.

HRMS (ESI):  $\text{C}_{11}\text{H}_{16}\text{NO}_2$   $[\text{M}+\text{H}]^+$  calcd: 194.1176, found: 194.1179.

#### 1-(*p*-tolyl)but-3-en-2-one (16i)

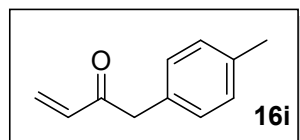

$R_f$  = 0.2 (hexanes:EtOAc, 20:1), colorless oil (189 mg, 59% yield in 2.0 mmol scale).

$^1\text{H}$  NMR (500 MHz, Chloroform-*d*)  $\delta$  7.14 (d,  $J$  = 7.7 Hz, 2H), 7.10 (d,  $J$  = 7.8 Hz, 2H), 6.45 – 6.35 (m, 1H), 6.29 (d,  $J$  = 17.5 Hz, 1H), 5.80 (d,  $J$  = 10.3 Hz, 1H), 3.83 (s, 2H), 2.33 (s, 3H).

$^{13}\text{C}$  NMR (126 MHz, Chloroform-*d*)  $\delta$  197.9, 136.7, 135.6, 131.0, 129.5, 129.4, 128.9, 46.9, 21.1.

HRMS (ESI):  $\text{C}_{11}\text{H}_{13}\text{O}$   $[\text{M}+\text{H}]^+$  calcd: 161.0961, found: 161.0958.

#### 2-(4-chlorophenyl)-*N*-methoxy-*N*-methylacetamide (S12j)

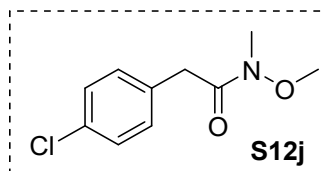

$R_f$  = 0.2 (hexanes:EtOAc, 4:1), colorless oil (995 mg, 93% yield in 5.0 mmol scale).

$^1\text{H}$  NMR (500 MHz, Chloroform-*d*)  $\delta$  7.28 (d,  $J$  = 8.3 Hz, 2H), 7.22 (d,  $J$  = 8.2 Hz, 2H), 3.73 (s, 2H), 3.63 (s, 3H), 3.19 (s, 3H).

$^{13}\text{C}$  NMR (126 MHz, Chloroform-*d*)  $\delta$  171.9, 133.4, 132.7, 130.7, 128.6, 61.3, 38.6, 32.3.

HRMS (ESI):  $\text{C}_{10}\text{H}_{13}\text{ClNO}_2$   $[\text{M}+\text{H}]^+$  calcd: 214.0629, found: 214.0625.

#### 1-(4-chlorophenyl)but-3-en-2-one (16j)

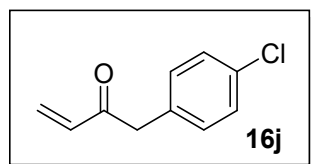

$R_f$  = 0.2 (hexanes:EtOAc, 20:1), white solid (188 mg, 52% yield in 2.0 mmol scale).

$^1\text{H}$  NMR (500 MHz, Chloroform-*d*)  $\delta$  7.30 (d,  $J$  = 8.3 Hz, 2H), 7.14 (d,  $J$  = 8.4 Hz, 2H), 6.49 – 6.36 (m, 1H), 6.30 (d,  $J$  = 17.5 Hz, 1H), 5.85 (d,  $J$  = 10.5 Hz, 1H), 3.85 (s, 2H).

$^{13}\text{C}$  NMR (126 MHz, Chloroform-*d*)  $\delta$  197.1, 135.6, 133.0, 132.5, 130.9, 129.2, 128.9, 46.2.

HRMS (ESI):  $\text{C}_{10}\text{H}_{10}\text{ClO}$   $[\text{M}+\text{H}]^+$  calcd: 181.0415, found: 181.0413.

#### *N*-methoxy-2-(4-methoxyphenyl)-*N*-methylacetamide (S12k)

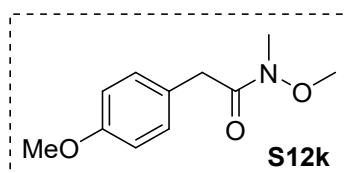

$R_f$  = 0.2 (hexanes:EtOAc, 2:1), colorless oil (993 mg, 95% yield in 5.0 mmol scale).

**<sup>1</sup>H NMR** (500 MHz, Chloroform-*d*) δ 7.21 (d, *J* = 8.6 Hz, 2H), 6.85 (d, *J* = 8.7 Hz, 2H), 3.78 (s, 3H), 3.71 (s, 2H), 3.61 (s, 3H), 3.18 (s, 3H).

**<sup>13</sup>C NMR** (126 MHz, Chloroform-*d*) δ 172.8, 158.5, 130.3, 127.0, 114.0, 61.3, 55.3, 38.5, 32.3.

**HRMS** (ESI): C<sub>11</sub>H<sub>16</sub>NO<sub>3</sub> [M+H]<sup>+</sup> calcd: 210.1125, found: 210.1127.

#### 1-(4-methoxyphenyl)but-3-en-2-one (16k)

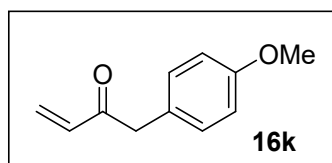

R<sub>f</sub> = 0.2 (hexanes:EtOAc, 20:1), colorless oil (225 mg, 64% yield in 2.0 mmol scale).

**<sup>1</sup>H NMR** (500 MHz, Chloroform-*d*) δ 7.12 (d, *J* = 8.7 Hz, 2H), 6.86 (d, *J* = 8.7 Hz, 2H), 6.44 – 6.35 (m, 1H), 6.33 – 6.26 (m, 1H), 5.81 (dd, *J* = 10.3, 1.3 Hz, 1H), 3.81 (s, 2H), 3.78 (s, 3H).

**<sup>13</sup>C NMR** (126 MHz, Chloroform-*d*) δ 198.1, 158.7, 135.6, 130.5, 128.9, 126.0, 114.2, 55.3, 46.4.

**HRMS** (ESI): C<sub>11</sub>H<sub>13</sub>O<sub>2</sub> [M+H]<sup>+</sup> calcd: 177.0910, found: 177.0907.

#### *N*-methoxy-2-(2-methoxyphenyl)-*N*-methylacetamide (S12l)

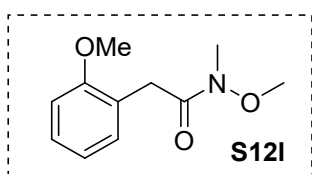

R<sub>f</sub> = 0.2 (hexanes:EtOAc, 4:1), colorless oil (972 mg, 93% yield in 5.0 mmol scale).

**<sup>1</sup>H NMR** (500 MHz, Chloroform-*d*) δ 7.25 – 7.17 (m, 2H), 6.91 (t, *J* = 7.4 Hz, 1H), 6.86 (d, *J* = 8.1 Hz, 1H), 3.81 (s, 3H), 3.77 (s, 2H), 3.66 (s, 3H), 3.20 (s, 3H).

**<sup>13</sup>C NMR** (126 MHz, Chloroform-*d*) δ 157.4, 130.9, 128.2, 123.8, 120.6, 110.5, 61.2, 55.5, 33.5.

**HRMS** (ESI): C<sub>11</sub>H<sub>16</sub>NO<sub>3</sub> [M+H]<sup>+</sup> calcd: 210.1125, found: 210.1122.

#### 1-(2-methoxyphenyl)but-3-en-2-one (16l)

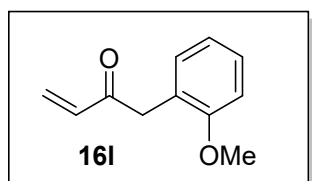

R<sub>f</sub> = 0.2 (hexanes:EtOAc, 20:1), colorless oil (162 mg, 46% yield in 2.0 mmol scale).

**<sup>1</sup>H NMR** (500 MHz, Chloroform-*d*) δ 7.25 (t, *J* = 7.7 Hz, 1H), 7.14 (d, *J* = 7.3 Hz, 1H), 6.92 (t, *J* = 7.4 Hz, 1H), 6.87 (d, *J* = 8.2 Hz, 1H), 6.46 – 6.36 (m, 1H), 6.34 – 6.26 (m, 1H), 5.76 (d, *J* = 10.1 Hz, 1H), 3.85 (s,

2H), 3.79 (s, 3H).

**<sup>13</sup>C NMR** (126 MHz, Chloroform-*d*) δ 198.1, 157.4, 135.7, 131.1, 128.5, 128.2, 123.3, 120.7, 110.6, 55.4, 41.8.

**HRMS** (ESI): C<sub>11</sub>H<sub>13</sub>O<sub>2</sub> [M+H]<sup>+</sup> calcd: 177.0910, found: 177.0905.

#### 2-(4-fluorophenyl)-*N*-methoxy-*N*-methylacetamide (S12m)

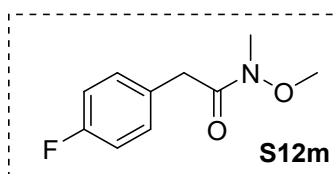

R<sub>f</sub> = 0.2 (hexanes:EtOAc, 4:1), colorless oil (896 mg, 91% yield in 5.0 mmol scale).

**<sup>1</sup>H NMR** (500 MHz, Chloroform-*d*) δ 7.25 (t, *J* = 7.2 Hz, 2H), 6.99 (t, 2H), 3.73 (s, 2H), 3.63 (s, 3H), 3.18 (s, 3H).

**<sup>13</sup>C NMR** (126 MHz, Chloroform-*d*) δ 172.2, 162.8, 160.9, 130.9,

130.8, 115.4, 115.2, 61.3, 38.4, 32.3.

**HRMS** (ESI): C<sub>10</sub>H<sub>13</sub>FNO<sub>2</sub> [M+H]<sup>+</sup> calcd: 198.0925, found: 198.0924.

#### 1-(4-fluorophenyl)but-3-en-2-one (16m)

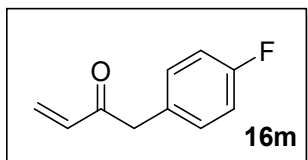

$R_f = 0.2$  (hexanes:EtOAc, 20:1), colorless oil (180 mg, 55% yield in 2.0 mmol scale).

$^1\text{H NMR}$  (500 MHz, Chloroform-*d*)  $\delta$  7.20 – 7.13 (m, 2H), 7.02 (t,  $J = 8.6$  Hz, 2H), 6.41 (dd,  $J = 17.6, 10.4$  Hz, 1H), 6.31 (dd,  $J = 17.6, 1.3$  Hz, 1H), 5.85 (dd,  $J = 10.4, 1.3$  Hz, 1H), 3.85 (s, 2H).

$^{13}\text{C NMR}$  (126 MHz, Chloroform-*d*)  $\delta$  197.4, 163.0, 161.0, 135.6, 131.0, 131.0, 129.0, 115.7, 115.5, 46.1.

**HRMS** (ESI):  $\text{C}_{10}\text{H}_{10}\text{FO}$   $[\text{M}+\text{H}]^+$  calcd: 165.0710, found: 165.0711.

#### *N*-methoxy-*N*-methyl-2-(naphthalen-1-yl)acetamide (**S12n**)

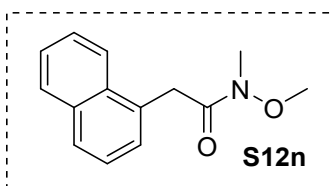

$R_f = 0.2$  (hexanes:EtOAc, 20:1), colorless oil (1.12 g, 98% yield in 5.0 mmol scale).

$^1\text{H NMR}$  (500 MHz, Chloroform-*d*)  $\delta$  8.06 (d,  $J = 8.4$  Hz, 1H), 7.86 (d,  $J = 8.0$  Hz, 1H), 7.78 (d,  $J = 7.4$  Hz, 1H), 7.56 – 7.46 (m, 2H), 7.46 – 7.40 (m, 2H), 4.23 (s, 2H), 3.61 (s, 3H), 3.23 (s, 3H).

$^{13}\text{C NMR}$  (126 MHz, Chloroform-*d*)  $\delta$  172.5, 133.9, 132.4, 131.4, 128.7, 127.7, 126.2, 125.7, 125.4, 124.0, 61.4, 37.1.

**HRMS** (ESI):  $\text{C}_{14}\text{H}_{16}\text{NO}_2$   $[\text{M}+\text{H}]^+$  calcd: 230.1176, found: 230.1173.

#### 1-(naphthalen-1-yl)but-3-en-2-one (**16n**)

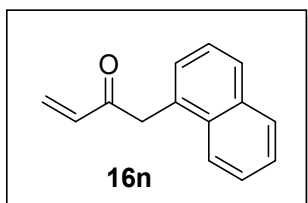

$R_f = 0.8$  (hexanes:EtOAc, 20:1), colorless oil (172 mg, 44% yield in 2.0 mmol scale).

$^1\text{H NMR}$  (500 MHz, Chloroform-*d*)  $\delta$  7.91 – 7.84 (m, 2H), 7.81 (d,  $J = 8.2$  Hz, 1H), 7.55 – 7.48 (m, 2H), 7.45 (t,  $J = 7.6$  Hz, 1H), 7.38 (d,  $J = 7.0$  Hz, 1H), 6.47 (dd,  $J = 17.5, 10.4$  Hz, 1H), 6.36 (dd,  $J = 17.5, 1.5$  Hz, 1H), 5.76 (dd,  $J = 10.4, 1.5$  Hz, 1H), 4.30 (s, 2H).

$^{13}\text{C NMR}$  (126 MHz, Chloroform-*d*)  $\delta$  197.7, 134.9, 134.0, 132.3, 130.7, 128.9, 128.8, 128.3, 128.1, 126.5, 125.9, 125.5, 123.9, 45.7.

**HRMS** (ESI):  $\text{C}_{14}\text{H}_{13}\text{O}$   $[\text{M}+\text{H}]^+$  calcd: 197.0961, found: 197.0966.

## 4. Substrate Scope of the Michael Addition Reaction

### 4.1 Preparation of 15

**General procedure:** Ni(ClO<sub>4</sub>)<sub>2</sub>·6H<sub>2</sub>O (7.2 mg, 10 mmol%, 0.02 mmol), L-1 (13.6 mg, 12 mmol%, 0.024 mmol), KHCO<sub>3</sub> (20.0 mg, 0.2 mmol), and 4Å molecular sieves (20.0 mg) were stirred in anhydrous CH<sub>3</sub>CN (0.2 M) under argon atmosphere at 35 °C for 1 hour. Then a mixture of  $\alpha$ ,  $\beta$ -unsaturated  $\gamma$ -butyrolactam **13** (0.2 mmol) and  $\alpha$ ,  $\beta$ -unsaturated ketones **14** (0.24 mmol) in the acetonitrile was added to the above solution. The mixture was stirred at 35 °C until TLC showed the starting material was no longer consumed. The reaction mixture was filtered through Celite<sup>®</sup> and washed with EtOAc. The filtrate was then concentrated under reduced pressure to give a residue which was purified by silica gel chromatography to afford the addition product **15**.

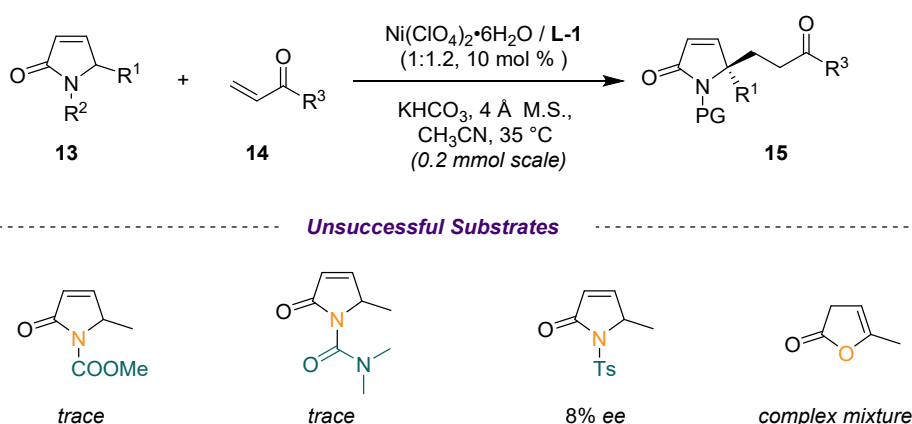

Scheme S1. Unsuccessful substrates for the Michael addition reactions.

#### *tert*-butyl 2-methyl-5-oxo-2-(3-oxobutyl)-2,5-dihydro-1*H*-pyrrole-1-carboxylate (**15a**)

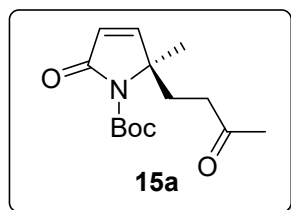

R<sub>f</sub> = 0.3 (hexanes:EtOAc, 1:1), white solid.

[ $\alpha$ ]<sub>D</sub><sup>20</sup> = -10.99 (*c* = 0.335, CHCl<sub>3</sub>).

**HPLC analysis:** 84% ee, Chiralpak OD-H, Hexane/*i*-PrOH = 85/15, flow rate = 0.7 mL/min,  $\lambda$  = 214 nm; Major isomer: *t*<sub>r</sub>(major) = 12.00 min, *t*<sub>r</sub>(minor) = 11.15 min.

**<sup>1</sup>H NMR** (500 MHz, Chloroform-*d*)  $\delta$  6.89 (d, *J* = 6.1 Hz, 1H), 6.01 (d, *J* = 6.0 Hz, 1H), 2.57 – 2.48 (m, 1H), 2.25 – 2.17 (m, 1H), 2.13 – 2.08 (m, 1H), 2.07 (s, 3H), 2.06 – 1.99 (m, 1H), 1.55 (s, 9H), 1.55 (s, 3H).

**<sup>13</sup>C NMR** (126 MHz, Chloroform-*d*)  $\delta$  207.0, 169.5, 156.1, 149.3, 124.7, 83.1, 67.8, 37.4, 30.1, 29.2, 28.2, 23.9.

**HRMS** (ESI): C<sub>14</sub>H<sub>21</sub>NNaO<sub>4</sub> [M+Na]<sup>+</sup> calcd: 290.1363, found: 290.1358.

#### *tert*-butyl 2-ethyl-5-oxo-2-(3-oxobutyl)-2,5-dihydro-1*H*-pyrrole-1-carboxylate (**15b**)

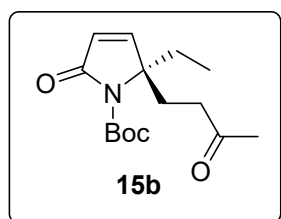

R<sub>f</sub> = 0.3 (hexanes:EtOAc, 1:1), white solid.

[ $\alpha$ ]<sub>D</sub><sup>20</sup> = -4.88 (*c* = 0.355, CHCl<sub>3</sub>).

**HPLC analysis:** 75% ee, Chiralpak OD-H, Hexane/*i*-PrOH = 90/10, flow rate = 0.4 mL/min,  $\lambda$  = 214 nm; Major isomer: *t*<sub>r</sub>(major) = 24.14 min, *t*<sub>r</sub>(minor) = 25.67 min.

**<sup>1</sup>H NMR** (500 MHz, Chloroform-*d*) δ 6.79 (d, *J* = 6.1 Hz, 1H), 6.09 (d, *J* = 6.1 Hz, 1H), 2.51 – 2.44 (m, 1H), 2.28 – 2.20 (m, 2H), 2.18 – 2.09 (m, 2H), 2.08 (s, 3H), 1.83 – 1.75 (m, 1H), 1.55 (s, 9H), 0.70 (t, *J* = 7.5 Hz, 3H).

**<sup>13</sup>C NMR** (126 MHz, Chloroform-*d*) δ 207.3, 170.1, 154.7, 149.3, 126.0, 83.1, 71.4, 37.1, 30.2, 29.1, 28.8, 28.2, 7.4.

**HRMS** (ESI): C<sub>15</sub>H<sub>23</sub>NNaO<sub>4</sub> [M+Na]<sup>+</sup> calcd: 304.1519, found: 304.1512.

***tert*-butyl 5-oxo-2-(3-oxobutyl)-2-propyl-2,5-dihydro-1*H*-pyrrole-1-carboxylate (15c)**

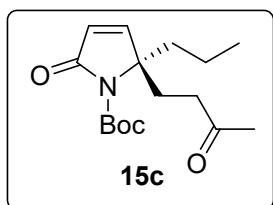

R<sub>f</sub> = 0.3 (hexanes:EtOAc, 1:1), white solid.

[α]<sub>D</sub><sup>20</sup> = -15.03 (*c* = 0.173, CHCl<sub>3</sub>).

**HPLC analysis:** 73% ee, Chiralpak OD-H, Hexane/*i*-PrOH = 90/10, flow rate = 0.6 mL/min, λ = 214 nm; Major isomer: *t*<sub>r</sub>(major) = 14.47 min, *t*<sub>r</sub>(minor) = 15.75 min.

**<sup>1</sup>H NMR** (500 MHz, Chloroform-*d*) δ 6.81 (d, *J* = 6.1 Hz, 1H), 6.05 (d, *J* = 6.0 Hz, 1H), 2.49 – 2.41 (m, 1H), 2.25 – 2.14 (m, 2H), 2.14 – 2.06 (m, 2H), 2.06 (s, 3H), 1.74 – 1.67 (m, 1H), 1.53 (s, 9H), 1.10 – 1.02 (m, 2H), 0.86 (t, *J* = 7.3 Hz, 3H).

**<sup>13</sup>C NMR** (126 MHz, Chloroform-*d*) δ 207.3, 170.1, 155.0, 149.3, 125.6, 83.1, 71.1, 38.4, 37.0, 30.2, 29.0, 28.2, 16.5, 14.0.

**HRMS** (ESI): C<sub>16</sub>H<sub>25</sub>NNaO<sub>4</sub> [M+Na]<sup>+</sup> calcd: 318.1676, found: 318.1674.

***tert*-butyl 2-(3-(methoxy(methyl)amino)-3-oxopropyl)-5-oxo-2-(3-oxobutyl)-2,5-dihydro-1*H*-pyrrole-1-carboxylate (15d)**

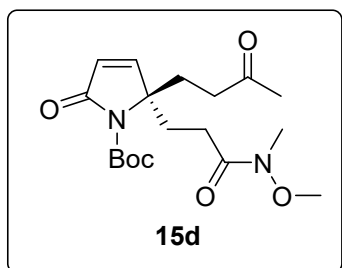

R<sub>f</sub> = 0.2 (hexanes:EtOAc, 0:1), white solid.

[α]<sub>D</sub><sup>20</sup> = +11.65 (*c* = 0.105, CHCl<sub>3</sub>).

**HPLC analysis:** 68% ee, Chiralpak AD-H, Hexane/*i*-PrOH/MeOH = 90/05/05, flow rate = 0.7 mL/min, λ = 214 nm; Major isomer: *t*<sub>r</sub>(major) = 24.94 min, *t*<sub>r</sub>(minor) = 28.89 min. The enantiomeric excess can be enhanced to >99% by recrystallization from 10% EtOAc in *n*-hexane.

**<sup>1</sup>H NMR** (500 MHz, Chloroform-*d*) δ 6.83 (d, *J* = 6.1 Hz, 1H), 6.04 (d, *J* = 6.1 Hz, 1H), 3.57 (s, 3H), 3.09 (s, 3H), 2.57 – 2.44 (m, 2H), 2.23 – 2.05 (m, 6H), 2.04 (s, 3H), 1.52 (s, 9H).

**<sup>13</sup>C NMR** (126 MHz, Chloroform-*d*) δ 206.9, 173.0, 170.0, 154.7, 149.2, 125.7, 83.5, 70.6, 61.3, 37.0, 32.2, 30.4, 30.1, 29.2, 28.1, 25.5.

**HRMS** (ESI): C<sub>18</sub>H<sub>28</sub>N<sub>2</sub>NaO<sub>6</sub> [M+Na]<sup>+</sup> calcd: 391.1840, found: 391.1838.

***tert*-butyl 2-(2-(1,3-dioxolan-2-yl)ethyl)-5-oxo-2-(3-oxobutyl)-2,5-dihydro-1*H*-pyrrole-1-carboxylate (15e)**

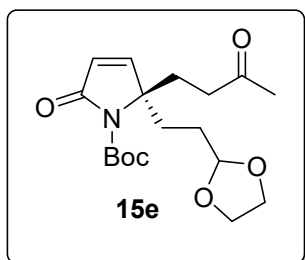

R<sub>f</sub> = 0.2 (hexanes:EtOAc, 1:1), white solid.

[α]<sub>D</sub><sup>20</sup> = -0.44 (*c* = 0.450, CHCl<sub>3</sub>).

**HPLC analysis:** 71% ee, Chiralpak AD-H, Hexane/*i*-PrOH = 85/15, flow rate = 0.7 mL/min, λ = 214 nm; Major isomer: *t*<sub>r</sub>(major) = 18.55 min, *t*<sub>r</sub>(minor) = 15.84 min.

**<sup>1</sup>H NMR** (500 MHz, Chloroform-*d*) δ 6.80 (d, *J* = 6.1 Hz, 1H), 6.07 (d, *J* = 6.0 Hz, 1H), 4.80 (t, *J* = 4.4 Hz, 1H), 3.94 – 3.87 (m, 2H), 3.83 –

3.78 (m, 2H), 2.52 – 2.44 (m, 1H), 2.42 – 2.34 (m, 1H), 2.25 – 2.18 (m, 1H), 2.16 – 2.07 (m, 2H), 2.06 (s, 3H), 1.87 – 1.81 (m, 1H), 1.54 (s, 9H), 1.43 – 1.33 (m, 2H).

<sup>13</sup>C NMR (126 MHz, Chloroform-*d*) δ 207.0, 169.8, 154.5, 149.1, 126.0, 103.5, 83.3, 70.5, 65.0, 37.0, 30.2, 29.8, 29.1, 28.1, 27.6.

HRMS (ESI): C<sub>18</sub>H<sub>27</sub>NNaO<sub>6</sub> [M+Na]<sup>+</sup> calcd: 376.1731, found: 376.1726.

**tert-butyl 2-allyl-5-oxo-2-(3-oxo-3-(2-oxooxazolidin-3-yl)propyl)-2,5-dihydro-1H-pyrrole-1-carboxylate (15f)**

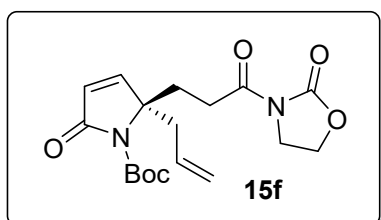

R<sub>f</sub> = 0.1 (hexanes:EtOAc, 2:1), white solid.

[α]<sub>D</sub><sup>20</sup> = -16.50 (*c* = 0.208, CHCl<sub>3</sub>).

**HPLC analysis:** 73% ee, Chiralpak OD-H, Hexane/*i*-PrOH = 60/40, flow rate = 0.7 mL/min, λ = 214 nm; Major isomer: *t*<sub>r</sub>(major) = 18.44 min, *t*<sub>r</sub>(minor) = 25.61 min.

<sup>1</sup>H NMR (500 MHz, Chloroform-*d*) δ 6.93 (d, *J* = 6.1 Hz, 1H), 6.09 (d, *J* = 6.1 Hz, 1H), 5.51 – 5.38 (m, 1H), 5.09 – 5.02 (m, 2H), 4.42 – 4.36 (m, 2H), 4.02 – 3.91 (m, 2H), 2.99 – 2.90 (m, 1H), 2.75 – 2.65 (m, 3H), 2.57 – 2.50 (m, 1H), 2.16 – 2.10 (m, 1H), 1.56 (s, 9H).

<sup>13</sup>C NMR (126 MHz, Chloroform-*d*) δ 172.3, 169.5, 153.9, 153.3, 149.3, 130.6, 126.3, 120.1, 83.2, 70.5, 62.1, 42.6, 40.4, 30.0, 29.2, 28.2.

HRMS (ESI): C<sub>18</sub>H<sub>24</sub>N<sub>2</sub>NaO<sub>6</sub> [M+Na]<sup>+</sup> calcd: 387.1527, found: 387.1521.

**tert-butyl 2-methyl-5-oxo-2-(3-oxo-3-(2-oxooxazolidin-3-yl)propyl)-2,5-dihydro-1H-pyrrole-1-carboxylate (15g)**

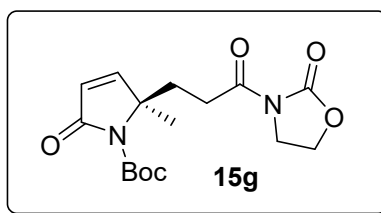

R<sub>f</sub> = 0.2 (hexanes:EtOAc, 1:1), white solid.

[α]<sub>D</sub><sup>20</sup> = -12.03 (*c* = 0.453, CHCl<sub>3</sub>).

**HPLC analysis:** 77% ee, Chiralpak IC, Hexane/*i*-PrOH/MeOH = 70/20/10, flow rate = 0.7 mL/min, λ = 214 nm; Major isomer: *t*<sub>r</sub>(major) = 47.32 min, *t*<sub>r</sub>(minor) = 69.71 min.

<sup>1</sup>H NMR (500 MHz, Chloroform-*d*) δ 7.03 (d, *J* = 6.0 Hz, 1H), 6.08 (d, *J* = 6.0 Hz, 1H), 4.43 (t, *J* = 8.3 Hz, 2H), 4.07 – 3.95 (m, 2H), 2.76 – 2.68 (m, 3H), 2.15 (s, 1H), 1.61 (s, 9H), 1.60 (s, 3H).

<sup>13</sup>C NMR (126 MHz, Chloroform-*d*) δ 172.2, 169.4, 155.8, 153.3, 149.3, 125.0, 83.2, 67.8, 62.1, 42.6, 30.8, 29.6, 28.2, 24.0.

HRMS (ESI): C<sub>16</sub>H<sub>22</sub>N<sub>2</sub>NaO<sub>6</sub> [M+Na]<sup>+</sup> calcd: 361.1370, found: 361.1368.

**tert-butyl 2-methyl-5-oxo-2-(3-oxopropyl)-2,5-dihydro-1H-pyrrole-1-carboxylate (15h)**

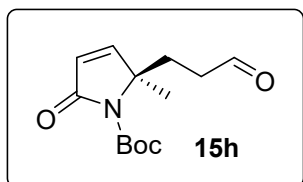

R<sub>f</sub> = 0.3 (hexanes:EtOAc, 1:1), colorless oil.

[α]<sub>D</sub><sup>20</sup> = -0.23 (*c* = 0.383, CHCl<sub>3</sub>).

**HPLC analysis:** 80% ee was obtained by its derivative **15h1**.

<sup>1</sup>H NMR (500 MHz, Chloroform-*d*) δ 9.74 (s, 1H), 6.94 (d, *J* = 6.0 Hz, 1H), 6.08 (d, *J* = 6.0 Hz, 1H), 2.68 – 2.61 (m, 1H), 2.36 – 2.26 (m, 1H), 2.25 – 2.17 (m, 1H), 2.15 – 2.07 (m, 1H), 1.61 (s, 3H), 1.60 (s, 9H).

<sup>13</sup>C NMR (126 MHz, Chloroform-*d*) δ 200.3, 169.2, 155.7, 149.3, 125.1, 83.3, 67.5, 38.1, 28.2, 27.8, 23.9.

HRMS (ESI): C<sub>13</sub>H<sub>19</sub>NNaO<sub>4</sub> [M+Na]<sup>+</sup> calcd: 276.1206, found: 276.1204.



**tert-butyl 2-(3,3-dimethoxypropyl)-2-methyl-5-oxo-2,5-dihydro-1H-pyrrole-1-carboxylate (15h1)**

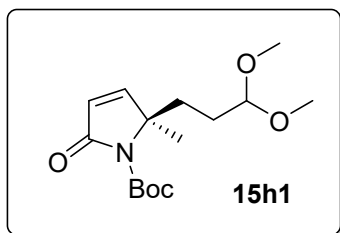

$R_f = 0.4$  (hexanes:EtOAc, 1:1), white solid.

$[\alpha]_D^{20} = +3.92$  ( $c = 0.393$ ,  $\text{CHCl}_3$ ).

**HPLC analysis:** 80% ee, Chiralpak IC, Hexane/*i*-PrOH = 85/15, flow rate = 0.7 mL/min,  $\lambda = 214$  nm; Major isomer:  $t_r(\text{major}) = 26.10$  min,  $t_r(\text{minor}) = 20.93$  min.

**$^1\text{H NMR}$**  (500 MHz, Chloroform-*d*)  $\delta$  6.91 (d,  $J = 6.1$  Hz, 1H), 6.04 (d,  $J = 6.0$  Hz, 1H), 4.28 (t,  $J = 5.4$  Hz, 1H), 3.28 (s, 3H), 3.26 (s, 3H), 2.33 (d,  $J = 31.2$  Hz, 1H), 1.76 – 1.69 (m, 1H), 1.56 (s, 9H), 1.53 (s, 3H), 1.38 – 1.32 (m, 1H), 1.30 – 1.25 (m, 1H).

**$^{13}\text{C NMR}$**  (126 MHz, Chloroform-*d*)  $\delta$  169.5, 156.1, 149.4, 124.9, 104.1, 82.9, 68.0, 53.3, 52.7, 30.9, 28.2, 26.8, 24.0.

**HRMS** (ESI):  $\text{C}_{15}\text{H}_{25}\text{NNaO}_5$   $[\text{M}+\text{Na}]^+$  calcd: 322.1625, found: 322.1619.

**tert-butyl 2-methyl-5-oxo-2-(3-oxopentyl)-2,5-dihydro-1H-pyrrole-1-carboxylate (15i)**

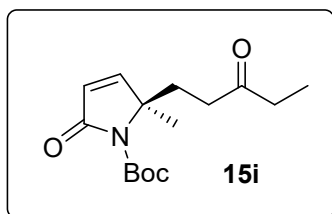

$R_f = 0.2$  (hexanes:EtOAc, 1:1), white solid.

$[\alpha]_D^{20} = -0.30$  ( $c = 0.380$ ,  $\text{CHCl}_3$ ).

**HPLC analysis:** 83% ee, Chiralpak OD-H, Hexane/*i*-PrOH/MeOH = 90/05/05, flow rate = 0.3 mL/min,  $\lambda = 214$  nm; Major isomer:  $t_r(\text{major}) = 25.05$  min,  $t_r(\text{minor}) = 27.22$  min.

**$^1\text{H NMR}$**  (500 MHz, Chloroform-*d*)  $\delta$  6.93 (d,  $J = 6.0$  Hz, 1H), 6.05 (d,  $J = 6.1$  Hz, 1H), 2.61 – 2.53 (m, 1H), 2.43 – 2.33 (m, 2H), 2.27 – 2.18 (m, 1H), 2.14 – 2.07 (m, 2H), 1.60 (s, 9H), 1.59 (s, 3H), 1.05 (t,  $J = 7.3$  Hz, 3H).

**$^{13}\text{C NMR}$**  (126 MHz, Chloroform-*d*)  $\delta$  210.0, 169.6, 156.2, 149.3, 124.6, 83.1, 67.9, 36.2, 36.0, 29.4, 28.2, 24.0, 7.8.

**HRMS** (ESI):  $\text{C}_{15}\text{H}_{23}\text{NNaO}_4$   $[\text{M}+\text{Na}]^+$  calcd: 304.1519, found: 304.1514.

**benzyl 2-methyl-5-oxo-2-(3-oxobutyl)-2,5-dihydro-1H-pyrrole-1-carboxylate (15j)**

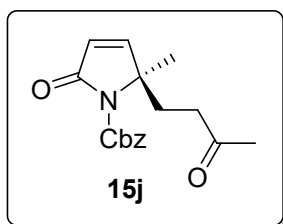

$R_f = 0.2$  (hexanes:EtOAc, 2:1), colorless oil.

$[\alpha]_D^{20} = -3.82$  ( $c = 0.433$ ,  $\text{CHCl}_3$ ).

**HPLC analysis:** 70% ee, Chiralpak OD-H, Hexane/*i*-PrOH = 95/5, flow rate = 0.7 mL/min,  $\lambda = 214$  nm; Major isomer:  $t_r(\text{major}) = 79.57$  min,  $t_r(\text{minor}) = 75.81$  min.

**$^1\text{H NMR}$**  (500 MHz, Chloroform-*d*)  $\delta$  7.46 (d,  $J = 6.9$  Hz, 2H), 7.37 (t,  $J = 7.3$  Hz, 2H), 7.33 (d,  $J = 6.9$  Hz, 1H), 6.95 (d,  $J = 6.0$  Hz, 1H), 6.03 (d,  $J = 6.0$  Hz, 1H), 5.37 – 5.29 (m, 2H), 2.57 – 2.49 (m, 1H), 2.17 – 2.09 (m, 1H), 2.08 – 2.01 (m, 2H), 2.00 (s, 3H), 1.56 (s, 3H).

**$^{13}\text{C NMR}$**  (126 MHz, Chloroform-*d*)  $\delta$  207.1, 169.0, 156.9, 150.7, 135.4, 128.7, 128.4, 128.1, 124.5, 68.2, 67.9, 37.3, 30.1, 28.9, 23.8.

**HRMS** (ESI):  $\text{C}_{17}\text{H}_{19}\text{NNaO}_4$   $[\text{M}+\text{Na}]^+$  calcd: 324.1206, found: 324.1200.

**(3*r*)-adamantan-1-yl 2-methyl-5-oxo-2-(3-oxobutyl)-2,5-dihydro-1H-pyrrole-1-carboxylate (15k)**

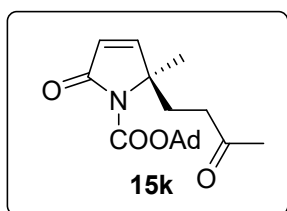

$R_f = 0.2$  (hexanes:EtOAc, 2:1), colorless oil.

$[\alpha]_D^{20} = -42.15$  ( $c = 0.138$ ,  $\text{CHCl}_3$ ).

**HPLC analysis:** 80% ee, Chiralpak OD-H, Hexane/*i*-PrOH = 85/15, flow rate = 0.7 mL/min,  $\lambda$  = 214 nm; Major isomer:  $t_r(\text{major})$  = 13.49 min,  $t_r(\text{minor})$  = 12.12 min.

**$^1\text{H NMR}$**  (500 MHz, Chloroform-*d*)  $\delta$  6.87 (d,  $J$  = 6.0 Hz, 1H), 6.00 (d,  $J$  = 6.0 Hz, 1H), 2.56 – 2.47 (m, 1H), 2.20 (s, 9H), 2.13 – 1.98 (m, 6H), 1.67 (s, 6H), 1.54 (s, 3H).

**$^{13}\text{C NMR}$**  (126 MHz, Chloroform-*d*)  $\delta$  207.2, 169.6, 156.1, 148.8, 124.7, 83.2, 67.8, 41.5, 37.4, 36.1, 31.0, 30.2, 29.3, 24.0.

**HRMS** (ESI):  $\text{C}_{20}\text{H}_{28}\text{NO}_4$   $[\text{M}+\text{H}]^+$  calcd: 346.2013, found: 346.2008.

## 4.2 Preparation of 17

**General procedure:**  $\text{Ni}(\text{ClO}_4)_2 \cdot 6\text{H}_2\text{O}$  (7.2 mg, 0.020 mmol), **L-1** (13.6 mg, 0.024 mmol),  $\text{KHCO}_3$  (20.0 mg, 0.2 mmol), and 4Å molecular sieves (20.0 mg) were stirred in anhydrous 1,2-DCE (0.2 M) under argon atmosphere at 35 °C for 1 hour. Then a mixture of  $\alpha$ ,  $\beta$ -Unsaturated  $\gamma$ -butyrolactam **13** (0.2 mmol) and benzyl vinyl ketone **16** (0.24 mmol) in 1,2-DCE was added to the above solution. The mixture was stirred at 35 °C until TLC showed the starting material was no longer consumed. The reaction mixture was filtered through Celite® and washed with EtOAc. The filtrate was then concentrated under reduced pressure to give a residue which was purified by silica gel chromatography to afford the addition product octahydroindoles **17**.

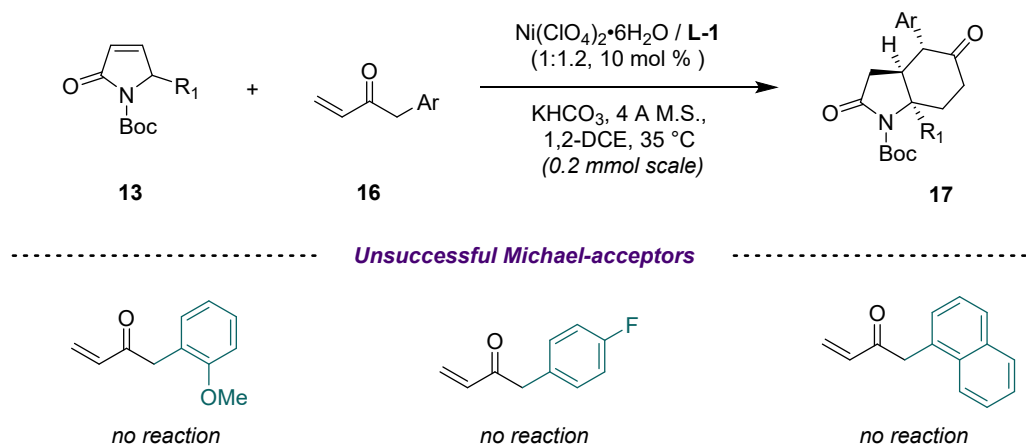

**Scheme S2.** Unsuccessful Michael-acceptors for the double Michael additions.

### *tert*-butyl 7a-methyl-2,5-dioxo-4-phenyloctahydro-1*H*-indole-1-carboxylate (**17a**)

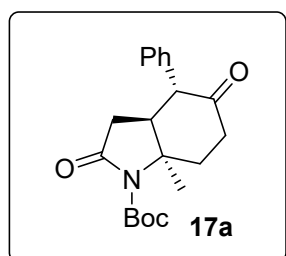

$R_f$  = 0.2 (hexanes:EtOAc, 4:1), white solid.

$[\alpha]_D^{20}$  = +6.92 ( $c$  = 0.535,  $\text{CHCl}_3$ ).

**HPLC analysis:** 83% ee, Chiralpak IC, Hexane/*i*-PrOH/MeOH = 70/20/10, flow rate = 0.7 mL/min,  $\lambda$  = 214 nm; Major isomer:  $t_r(\text{major})$  = 24.38 min,  $t_r(\text{minor})$  = 28.84 min.

**$^1\text{H NMR}$**  (500 MHz, Chloroform-*d*)  $\delta$  7.34 (t,  $J$  = 7.2 Hz, 2H), 7.29 (d,  $J$  = 7.3 Hz, 1H), 7.01 (d,  $J$  = 7.0 Hz, 2H), 3.49 (d,  $J$  = 12.6 Hz, 1H), 2.69 – 2.62 (m, 1H), 2.60 – 2.54 (m, 2H), 2.49 – 2.41 (m, 2H), 2.37 – 2.30 (m, 1H), 2.15 – 2.09 (m, 1H), 1.62 (s, 3H), 1.58 (s, 9H).

**$^{13}\text{C NMR}$**  (126 MHz, Chloroform-*d*)  $\delta$  209.1, 172.7, 150.1, 135.6, 129.5, 128.8, 127.7, 83.6, 63.7, 56.7, 43.3, 35.9, 35.7, 32.6, 28.2, 24.7.

**HRMS** (ESI): C<sub>20</sub>H<sub>25</sub>NNaO<sub>4</sub> [M+Na]<sup>+</sup> calcd: 366.1676, found: 366.1670.

**tert-butyl 7a-ethyl-2,5-dioxo-4-phenyloctahydro-1H-indole-1-carboxylate (17b)**

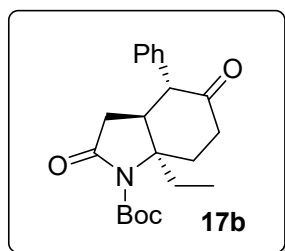

R<sub>f</sub> = 0.2 (hexanes:EtOAc, 4:1), white solid.

[α]<sub>D</sub><sup>20</sup> = +60.45 (c = 0.118, CHCl<sub>3</sub>).

**HPLC analysis:** 73% ee, Chiralpak IC, Hexane/*i*-PrOH/MeOH = 70/20/10, flow rate = 0.4 mL/min, λ = 214 nm; Major isomer: *t*<sub>r</sub>(major) = 44.07 min, *t*<sub>r</sub>(minor) = 39.57 min.

**<sup>1</sup>H NMR** (500 MHz, Chloroform-*d*) δ 7.35 (t, *J* = 7.4 Hz, 2H), 7.30 (d, *J* = 7.1 Hz, 1H), 7.04 (d, *J* = 7.3 Hz, 2H), 3.57 (d, *J* = 11.8 Hz, 1H), 2.68 – 2.45 (m, 5H), 2.38 – 2.31 (m, 1H), 2.26 – 2.19 (m, 1H), 2.19 – 2.14 (m, 1H), 1.93 – 1.85 (m, 1H), 1.57 (s, 9H), 0.98 (t, *J* = 7.5 Hz, 3H).

**<sup>13</sup>C NMR** (126 MHz, Chloroform-*d*) δ 209.2, 173.1, 150.3, 135.5, 129.4, 128.8, 127.8, 83.6, 66.8, 57.7, 40.2, 37.2, 35.9, 31.9, 31.1, 28.1, 8.3.

**HRMS** (ESI): C<sub>21</sub>H<sub>27</sub>NNaO<sub>4</sub> [M+Na]<sup>+</sup> calcd: 380.1832, found: 380.1827.

**tert-butyl 2,5-dioxo-4-phenyl-7a-propyloctahydro-1H-indole-1-carboxylate (17c)**

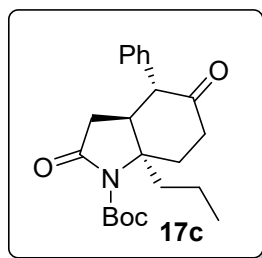

R<sub>f</sub> = 0.2 (hexanes:EtOAc, 4:1), white solid.

[α]<sub>D</sub><sup>20</sup> = +4.32 (c = 0.445, CHCl<sub>3</sub>).

**HPLC analysis:** 64% ee, Chiralpak IC, Hexane/*i*-PrOH/MeOH = 70/20/10, flow rate = 0.7 mL/min, λ = 214 nm; Major isomer: *t*<sub>r</sub>(major) = 24.23 min, *t*<sub>r</sub>(minor) = 18.93 min.

**<sup>1</sup>H NMR** (500 MHz, Chloroform-*d*) δ 7.36 – 7.32 (m, 2H), 7.30 (d, *J* = 7.2 Hz, 1H), 7.03 (d, *J* = 6.9 Hz, 2H), 3.56 (d, *J* = 12.0 Hz, 1H), 2.66 (dt, *J* = 14.2, 4.2 Hz, 1H), 2.61 – 2.52 (m, 3H), 2.51 – 2.44 (m, 1H), 2.37 – 2.30 (m, 1H), 2.17 – 2.09 (m, 2H), 1.87 – 1.78 (m, 1H), 1.56 (s, 9H), 1.40 – 1.33 (m, 2H), 0.98 (t, *J* = 7.2 Hz, 3H).

**<sup>13</sup>C NMR** (126 MHz, Chloroform-*d*) δ 209.2, 173.1, 150.3, 135.5, 129.4, 128.8, 127.8, 83.5, 66.5, 57.7, 40.9, 40.6, 37.2, 35.9, 32.1, 28.1, 17.2, 14.4.

**HRMS** (ESI): C<sub>22</sub>H<sub>29</sub>NNaO<sub>4</sub> [M+Na]<sup>+</sup> calcd: 394.1989, found: 394.1989.

**tert-butyl 7a-methyl-2,5-dioxo-4-(*o*-tolyl)octahydro-1H-indole-1-carboxylate (17d)**

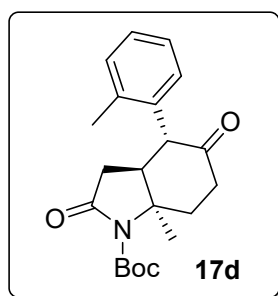

R<sub>f</sub> = 0.2 (hexanes:EtOAc, 4:1), white solid.

[α]<sub>D</sub><sup>20</sup> = +62.49 (c = 0.123, CHCl<sub>3</sub>).

**HPLC analysis:** 93% ee, Chiralpak IC, Hexane/*i*-PrOH/MeOH = 70/20/10, flow rate = 0.6 mL/min, λ = 214 nm; Major isomer: *t*<sub>r</sub>(major) = 18.96 min, *t*<sub>r</sub>(minor) = 22.30 min.

**<sup>1</sup>H NMR** (500 MHz, Chloroform-*d*) δ 7.22 (t, *J* = 8.3 Hz, 1H), 7.10 (d, *J* = 7.2 Hz, 1H), 6.86 – 6.78 (m, 2H), 3.43 (d, *J* = 14.9 Hz, 1H), 2.69 – 2.62 (m, 1H), 2.61 – 2.54 (m, 2H), 2.49 – 2.41 (m, 2H), 2.34 – 2.30 (m, 4H), 2.14 (d, *J* = 18.2 Hz, 1H), 1.63 (s, 3H), 1.58 (s, 9H).

**<sup>13</sup>C NMR** (126 MHz, Chloroform-*d*) δ 209.4, 172.8, 150.1, 138.5, 135.5, 130.3, 128.7, 128.5, 126.4, 83.6, 63.7, 56.6, 43.2, 35.9, 35.7, 32.7, 28.2, 24.7, 21.4.

**HRMS** (ESI): C<sub>21</sub>H<sub>27</sub>NNaO<sub>4</sub> [M+Na]<sup>+</sup> calcd: 380.1832, found: 380.1824.

**tert-butyl 4-(2-chlorophenyl)-7a-methyl-2,5-dioxooctahydro-1H-indole-1-carboxylate (17e)**

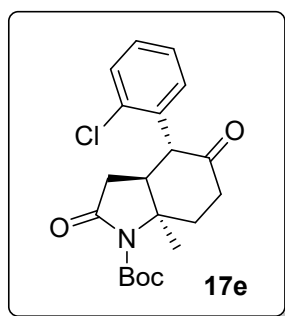

$R_f = 0.2$  (hexanes:EtOAc, 4:1), white solid.

$[\alpha]_D^{20} = +70.31$  ( $c = 0.245$ ,  $\text{CHCl}_3$ ).

**HPLC analysis:** 75% ee, Chiralpak AD-H, Hexane/*i*-PrOH = 80/20, flow rate = 0.7 mL/min,  $\lambda = 214$  nm; Major isomer:  $t_r(\text{major}) = 12.56$  min,  $t_r(\text{minor}) = 18.35$  min.

**$^1\text{H NMR}$**  (500 MHz, Chloroform-*d*)  $\delta$  7.43 – 7.37 (m, 1H), 7.27 – 7.23 (m, 2H), 7.09 – 7.01 (m, 1H), 3.84 (d,  $J = 10.0$  Hz, 1H), 2.75 – 2.64 (m, 2H), 2.63 – 2.56 (m, 2H), 2.55 – 2.47 (m, 1H), 2.35 – 2.28 (m, 1H), 2.10 (d,  $J = 16.7$  Hz, 1H), 1.64 (s, 3H), 1.58 (s, 9H).

**$^{13}\text{C NMR}$**  (126 MHz, Chloroform-*d*)  $\delta$  207.6, 172.6, 150.1, 134.6, 134.0, 131.6, 130.2, 129.2, 127.2, 83.6, 63.7, 54.7, 41.8, 35.8, 35.7, 32.6, 28.2, 24.8.

**HRMS** (ESI):  $\text{C}_{20}\text{H}_{24}\text{ClNNaO}_4$   $[\text{M}+\text{Na}]^+$  calcd: 400.1286, found: 400.1278.

**tert-butyl 7a-methyl-2,5-dioxo-4-(*m*-tolyl)octahydro-1H-indole-1-carboxylate (17f)**

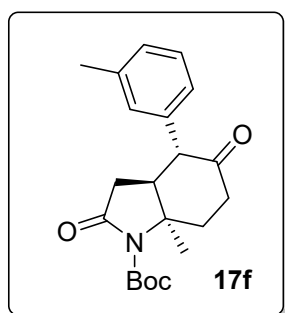

$R_f = 0.2$  (hexanes:EtOAc, 4:1), white solid.

$[\alpha]_D^{20} = +55.04$  ( $c = 0.185$ ,  $\text{CHCl}_3$ ).

**HPLC analysis:** 81% ee, Chiralpak IC, Hexane/*i*-PrOH/MeOH = 70/20/10, flow rate = 0.7 mL/min,  $\lambda = 214$  nm; Major isomer:  $t_r(\text{major}) = 24.48$  min,  $t_r(\text{minor}) = 28.67$  min.

**$^1\text{H NMR}$**  (500 MHz, Chloroform-*d*)  $\delta$  7.20 – 7.15 (m, 3H), 6.88 (d,  $J = 6.6$  Hz, 1H), 3.71 (d,  $J = 12.9$  Hz, 1H), 2.71 – 2.64 (m, 1H), 2.62 – 2.55 (m, 2H), 2.55 – 2.41 (m, 2H), 2.35 – 2.29 (m, 1H), 2.21 (s, 3H), 2.04 (d,  $J = 18.0$  Hz, 1H), 1.64 (s, 3H), 1.58 (s, 9H).

**$^{13}\text{C NMR}$**  (126 MHz, Chloroform-*d*)  $\delta$  209.1, 172.9, 150.1, 137.4, 134.3, 130.9, 128.5, 127.6, 126.4, 83.6, 63.7, 52.7, 42.7, 35.9, 35.8, 32.8, 28.2, 24.6, 20.2.

**HRMS** (ESI):  $\text{C}_{21}\text{H}_{27}\text{NNaO}_4$   $[\text{M}+\text{Na}]^+$  calcd: 380.1832, found: 380.1823.

**tert-butyl 4-(3-chlorophenyl)-7a-methyl-2,5-dioxooctahydro-1H-indole-1-carboxylate (17g)**

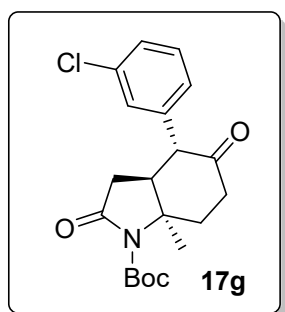

$R_f = 0.2$  (hexanes:EtOAc, 4:1), white solid.

$[\alpha]_D^{20} = +47.26$  ( $c = 0.145$ ,  $\text{CHCl}_3$ ).

**HPLC analysis:** 78% ee, Chiralpak IB-3, Hexane/*i*-PrOH = 70/30, flow rate = 0.5 mL/min,  $\lambda = 214$  nm; Major isomer:  $t_r(\text{major}) = 14.81$  min,  $t_r(\text{minor}) = 17.57$  min.

**$^1\text{H NMR}$**  (500 MHz, Chloroform-*d*)  $\delta$  7.31 – 7.26 (m, 2H), 7.02 (s, 1H), 6.91 (t,  $J = 4.6$  Hz, 1H), 3.48 (d,  $J = 12.7$  Hz, 1H), 2.72 – 2.65 (m, 1H), 2.61 – 2.54 (m, 2H), 2.49 – 2.38 (m, 2H), 2.36 – 2.29 (m, 1H), 2.10 (d,  $J = 18.4$  Hz, 1H), 1.62 (s, 3H), 1.57 (s, 9H).

**$^{13}\text{C NMR}$**  (126 MHz, Chloroform-*d*)  $\delta$  208.3, 172.3, 150.1, 137.6, 134.8, 130.0, 129.4, 128.0, 127.9, 83.7, 63.6, 56.4, 43.3, 35.8, 35.6, 32.6, 28.2, 24.7.

**HRMS** (ESI):  $\text{C}_{20}\text{H}_{24}\text{ClNNaO}_4$   $[\text{M}+\text{Na}]^+$  calcd: 400.1286, found: 400.1284.

**tert-butyl 7a-methyl-2,5-dioxo-4-(3-(trifluoromethyl)phenyl)octahydro-1H-indole-1-carboxylate (17h)**

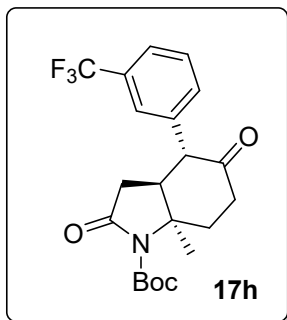

$R_f = 0.2$  (hexanes:EtOAc, 4:1), white solid.

$[\alpha]_D^{20} = +47.08$  ( $c = 0.160$ ,  $\text{CHCl}_3$ ).

**HPLC analysis:** 71% ee, Chiralpak OD-H, Hexane/*i*-PrOH = 85/15, flow rate = 0.7 mL/min,  $\lambda = 214$  nm; Major isomer:  $t_r(\text{major}) = 14.97$  min,  $t_r(\text{minor}) = 22.08$  min.

**$^1\text{H NMR}$**  (500 MHz, Chloroform-*d*)  $\delta$  7.57 (d,  $J = 7.4$  Hz, 1H), 7.48 (t,  $J = 7.6$  Hz, 1H), 7.28 (s, 1H), 7.22 (d,  $J = 7.4$  Hz, 1H), 3.60 (d,  $J = 12.7$  Hz, 1H), 2.74 – 2.66 (m, 1H), 2.64 – 2.56 (m, 2H), 2.53 – 2.42 (m, 2H), 2.40 – 2.33 (m, 1H), 2.06 (d,  $J = 19.9$  Hz, 1H), 1.64 (s, 3H), 1.58 (s, 9H).

**$^{13}\text{C NMR}$**  (126 MHz, Chloroform-*d*)  $\delta$  208.1, 172.1, 150.1, 136.6, 133.1, 131.2 (q,  $J = 32.1$  Hz), 129.3, 126.1 (q,  $J = 4.1$  Hz), 124.7 (q,  $J = 3.9$  Hz), 123.9 (q,  $J = 271.1$  Hz), 83.8, 63.6, 56.6, 43.3, 35.9, 35.6, 32.6, 28.1, 24.7.

**HRMS** (ESI):  $\text{C}_{21}\text{H}_{24}\text{F}_3\text{NNaO}_4$   $[\text{M}+\text{Na}]^+$  calcd: 434.1550, found: 434.1546.

***tert*-butyl 7a-methyl-2,5-dioxo-4-(*p*-tolyl)octahydro-1*H*-indole-1-carboxylate (17i)**

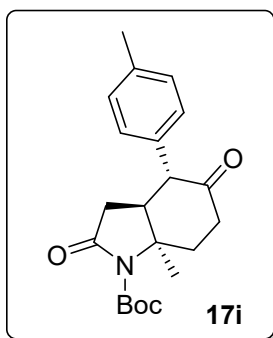

$R_f = 0.2$  (hexanes:EtOAc, 4:1), white solid.

$[\alpha]_D^{20} = +31.44$  ( $c = 0.148$ ,  $\text{CHCl}_3$ ).

**HPLC analysis:** 86% ee, Chiralpak IC, Hexane/*i*-PrOH/MeOH = 70/20/10, flow rate = 0.7 mL/min,  $\lambda = 214$  nm; Major isomer:  $t_r(\text{major}) = 36.65$  min,  $t_r(\text{minor}) = 42.69$  min.

**$^1\text{H NMR}$**  (500 MHz, Chloroform-*d*)  $\delta$  7.14 (d,  $J = 7.6$  Hz, 2H), 6.90 (d,  $J = 7.6$  Hz, 2H), 3.44 (d,  $J = 12.7$  Hz, 1H), 2.68 – 2.61 (m, 1H), 2.59 – 2.52 (m, 2H), 2.46 – 2.39 (m, 2H), 2.32 (s, 3H), 2.31 – 2.29 (m, 1H), 2.14 (d,  $J = 18.3$  Hz, 1H), 1.61 (s, 3H), 1.57 (s, 9H).

**$^{13}\text{C NMR}$**  (126 MHz, Chloroform-*d*)  $\delta$  209.4, 172.8, 150.2, 137.4, 132.5, 129.6, 129.3, 83.6, 63.7, 56.3, 43.3, 35.9, 35.7, 32.6, 28.2, 24.8, 21.1.

**HRMS** (ESI):  $\text{C}_{21}\text{H}_{27}\text{NNaO}_4$   $[\text{M}+\text{Na}]^+$  calcd: 380.1832, found: 380.1826.

***tert*-butyl 4-(4-chlorophenyl)-7a-methyl-2,5-dioxooctahydro-1*H*-indole-1-carboxylate (17j)**

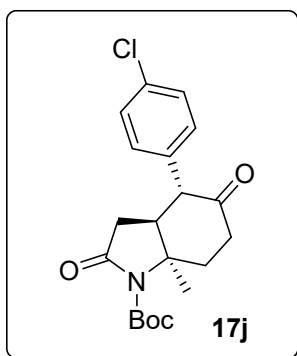

$R_f = 0.2$  (hexanes:EtOAc, 4:1), white solid.

$[\alpha]_D^{20} = +29.72$  ( $c = 0.248$ ,  $\text{CHCl}_3$ ).

**HPLC analysis:** 92% ee, Chiralpak IC, Hexane/*i*-PrOH/MeOH = 70/20/10, flow rate = 0.7 mL/min,  $\lambda = 214$  nm; Major isomer:  $t_r(\text{major}) = 17.70$  min,  $t_r(\text{minor}) = 21.43$  min.

**$^1\text{H NMR}$**  (500 MHz, Chloroform-*d*)  $\delta$  7.31 (d,  $J = 7.9$  Hz, 2H), 6.95 (d,  $J = 8.0$  Hz, 2H), 3.48 (d,  $J = 12.7$  Hz, 1H), 2.71 – 2.62 (m, 1H), 2.60 – 2.53 (m, 2H), 2.47 – 2.37 (m, 2H), 2.35 – 2.28 (m, 1H), 2.08 (d,  $J = 17.6$  Hz, 1H), 1.61 (s, 3H), 1.56 (s, 9H).

**$^{13}\text{C NMR}$**  (126 MHz, Chloroform-*d*)  $\delta$  208.7, 172.4, 150.1, 134.0, 133.7, 130.8, 129.1, 83.8, 63.7, 56.1, 43.3, 35.8, 35.6, 32.6, 28.2, 24.7.

**HRMS** (ESI):  $\text{C}_{20}\text{H}_{24}\text{ClNNaO}_4$   $[\text{M}+\text{Na}]^+$  calcd: 400.1286, found: 400.1284.

***tert*-butyl 4-(4-methoxyphenyl)-7a-methyl-2,5-dioxooctahydro-1*H*-indole-1-carboxylate (17k)**

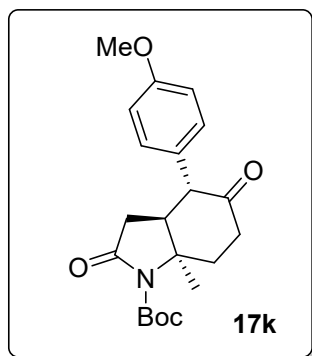

$R_f = 0.2$  (hexanes:EtOAc, 4:1), white solid.

$[\alpha]_D^{20} = +41.86$  ( $c = 0.120$ ,  $\text{CHCl}_3$ ).

**HPLC analysis:** 75% ee, Chiralpak IC, Hexane/*i*-PrOH/MeOH = 70/20/10, flow rate = 0.7 mL/min,  $\lambda = 214$  nm; Major isomer:  $t_r(\text{major}) = 48.27$  min,  $t_r(\text{minor}) = 59.75$  min.

**$^1\text{H NMR}$**  (500 MHz, Chloroform-*d*)  $\delta$  6.93 (d,  $J = 8.2$  Hz, 2H), 6.87 (d,  $J = 8.1$  Hz, 2H), 3.79 (s, 3H), 3.43 (d,  $J = 12.6$  Hz, 1H), 2.68 – 2.61 (m, 1H), 2.60 – 2.53 (m, 2H), 2.47 – 2.30 (m, 3H), 2.15 (d,  $J = 18.3$  Hz, 1H), 1.62 (s, 3H), 1.57 (s, 9H).

**$^{13}\text{C NMR}$**  (126 MHz, Chloroform-*d*)  $\delta$  209.5, 172.7, 159.1, 150.2, 130.4, 127.4, 114.4, 83.6, 63.7, 56.0, 55.3, 43.5, 35.9, 35.7, 32.6, 28.2, 24.8.

**HRMS** (ESI):  $\text{C}_{21}\text{H}_{27}\text{NNaO}_5$   $[\text{M}+\text{Na}]^+$  calcd: 396.1781, found: 396.1781.

## 5. NMR Spectra

<sup>1</sup>H NMR spectrum of compound **13a** (500 MHz, Chloroform-*d*)

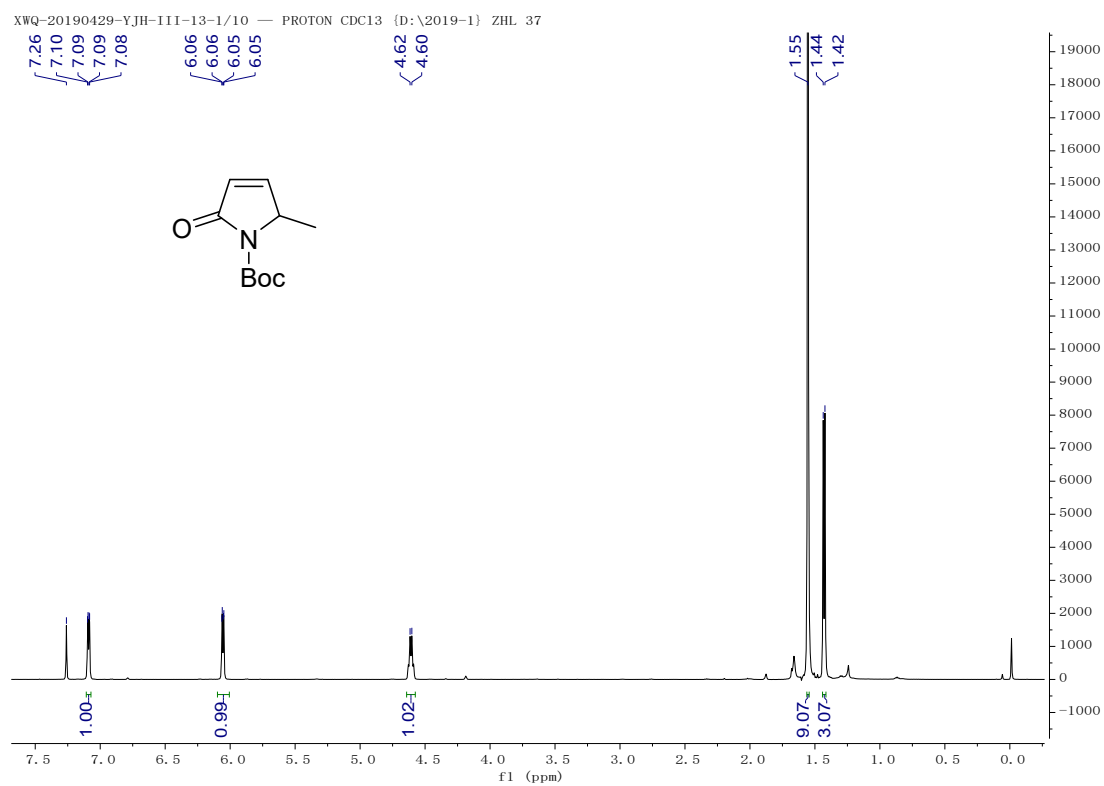

<sup>13</sup>C NMR spectrum of compound **13a** (126 MHz, Chloroform-*d*)

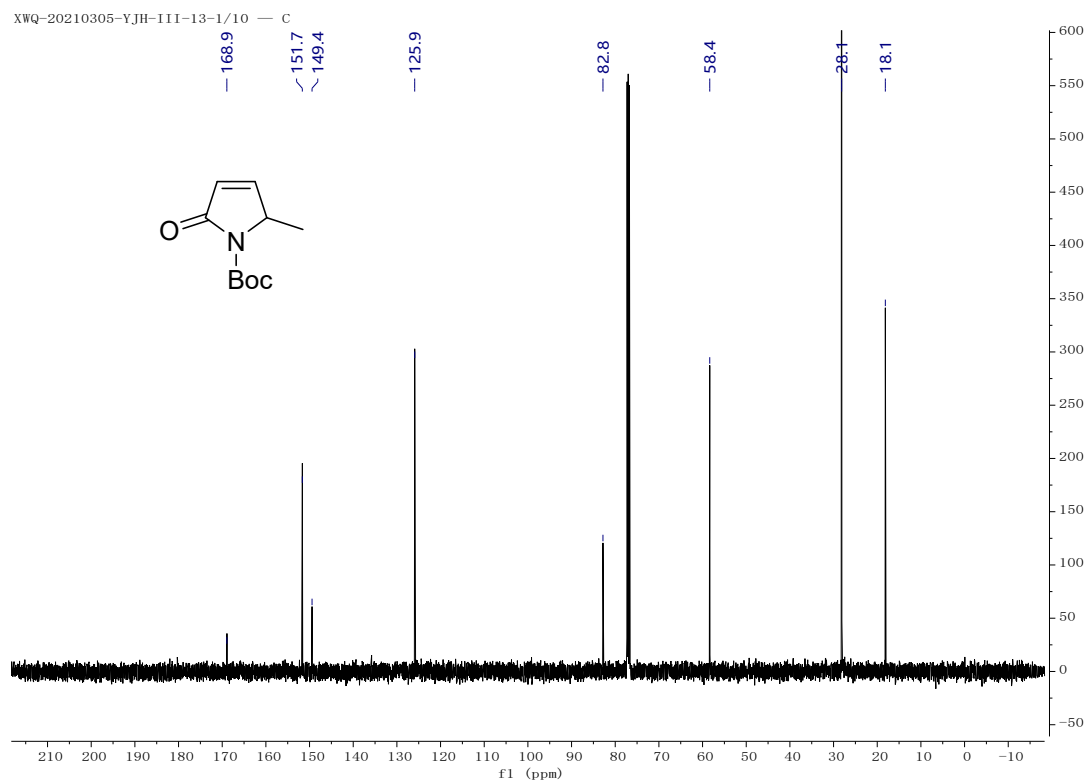

<sup>1</sup>H NMR spectrum of compound **13b** (500 MHz, Chloroform-*d*)

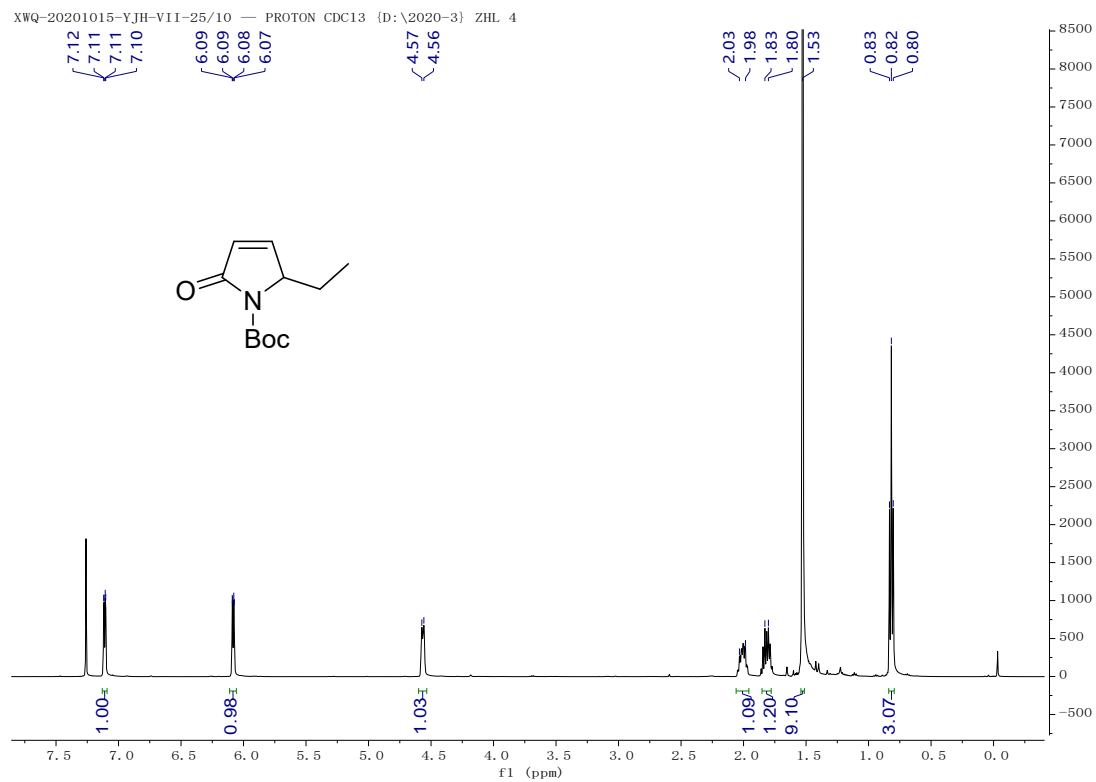

<sup>13</sup>C NMR spectrum of compound **13b** (126 MHz, Chloroform-*d*)

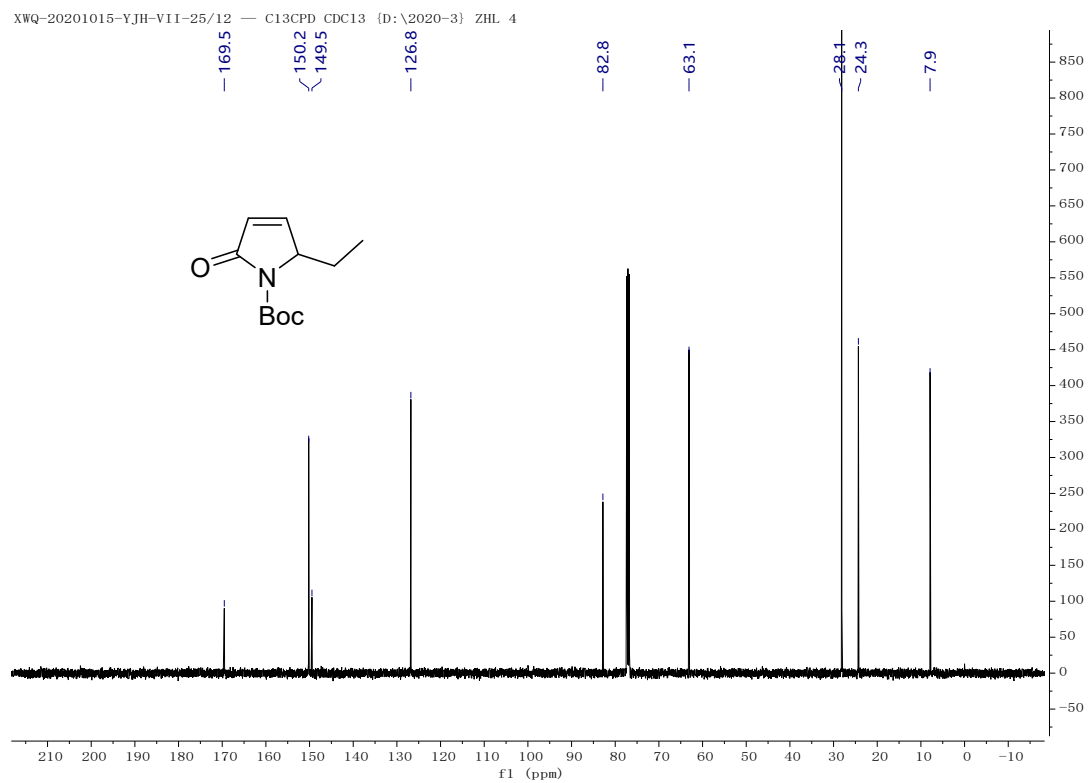



<sup>1</sup>H NMR spectrum of compound **13c** (500 MHz, Chloroform-*d*)

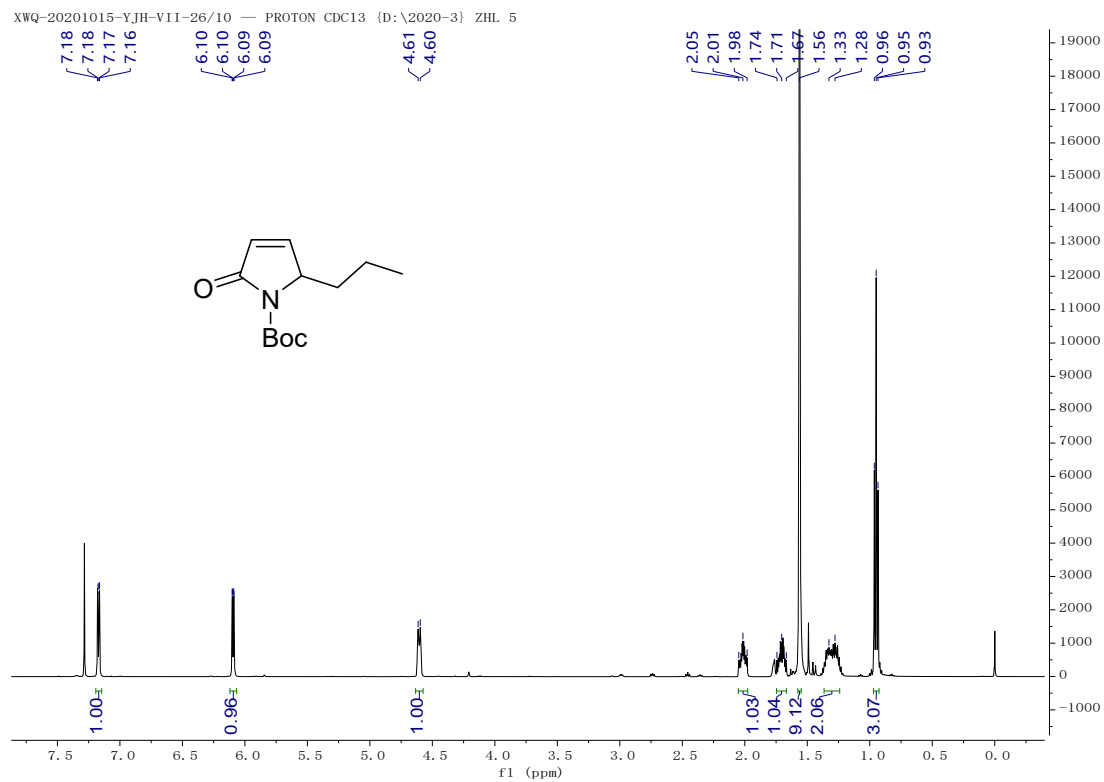

<sup>13</sup>C NMR spectrum of compound **13c** (126 MHz, Chloroform-*d*)

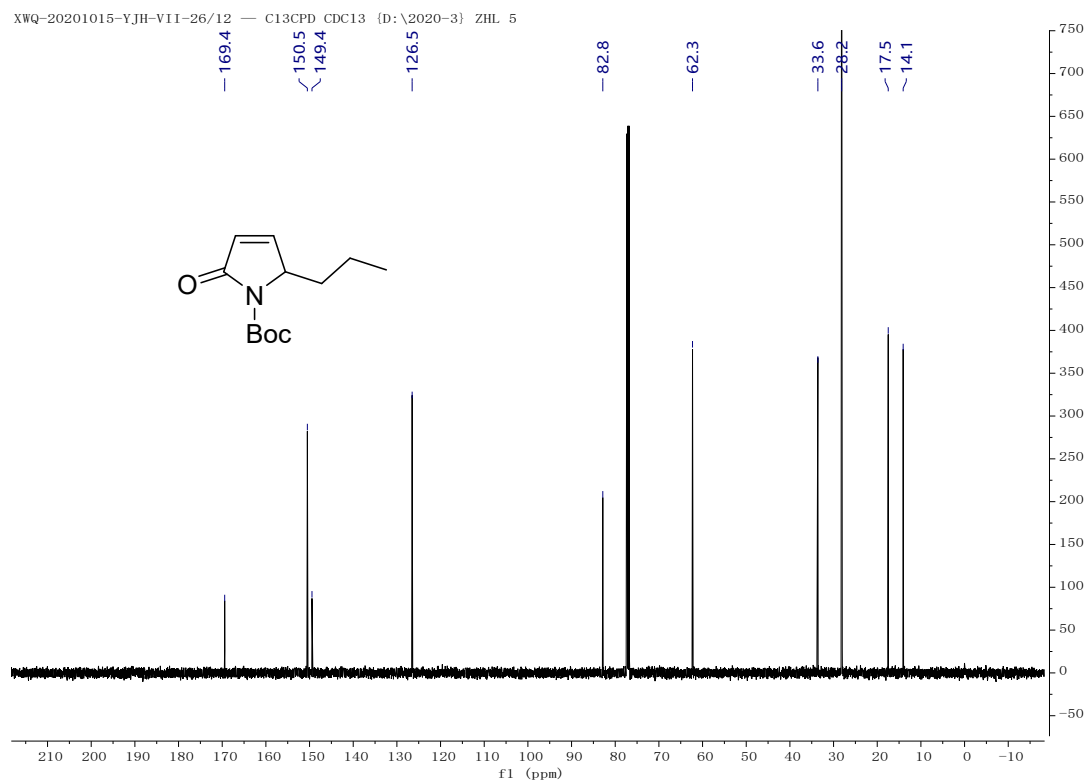

<sup>1</sup>H NMR spectrum of compound **13d** (500 MHz, Chloroform-*d*)

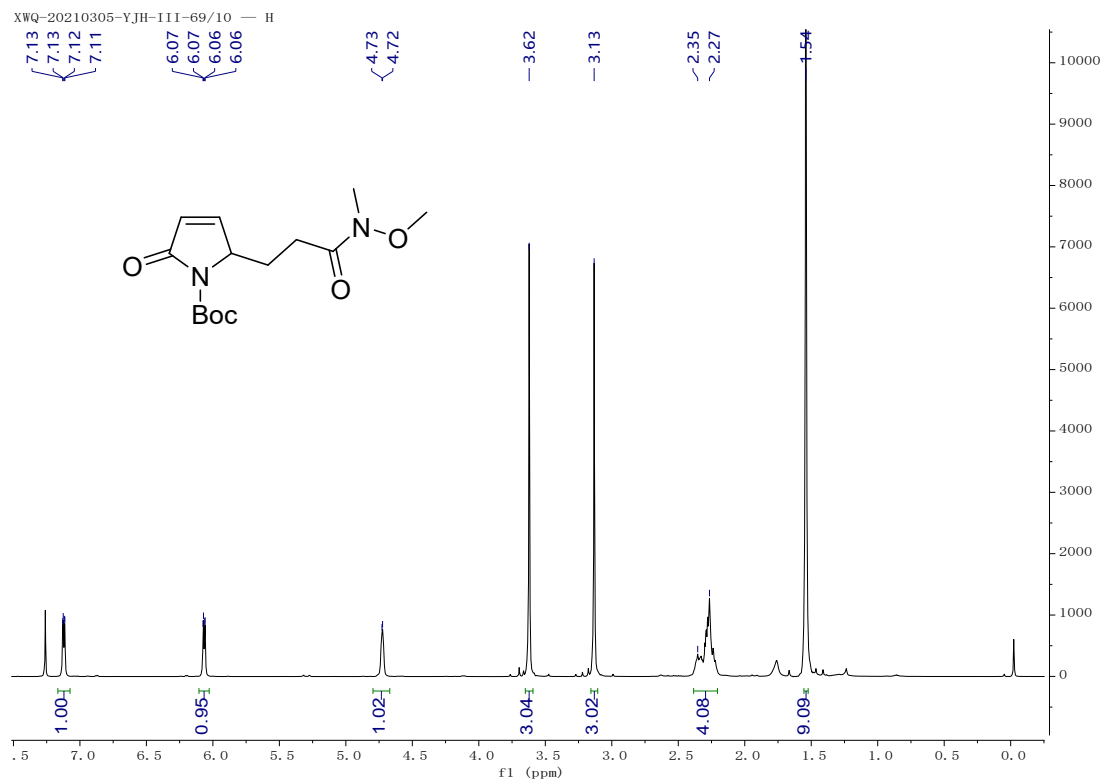

<sup>13</sup>C NMR spectrum of compound **13d** (126 MHz, Chloroform-*d*)

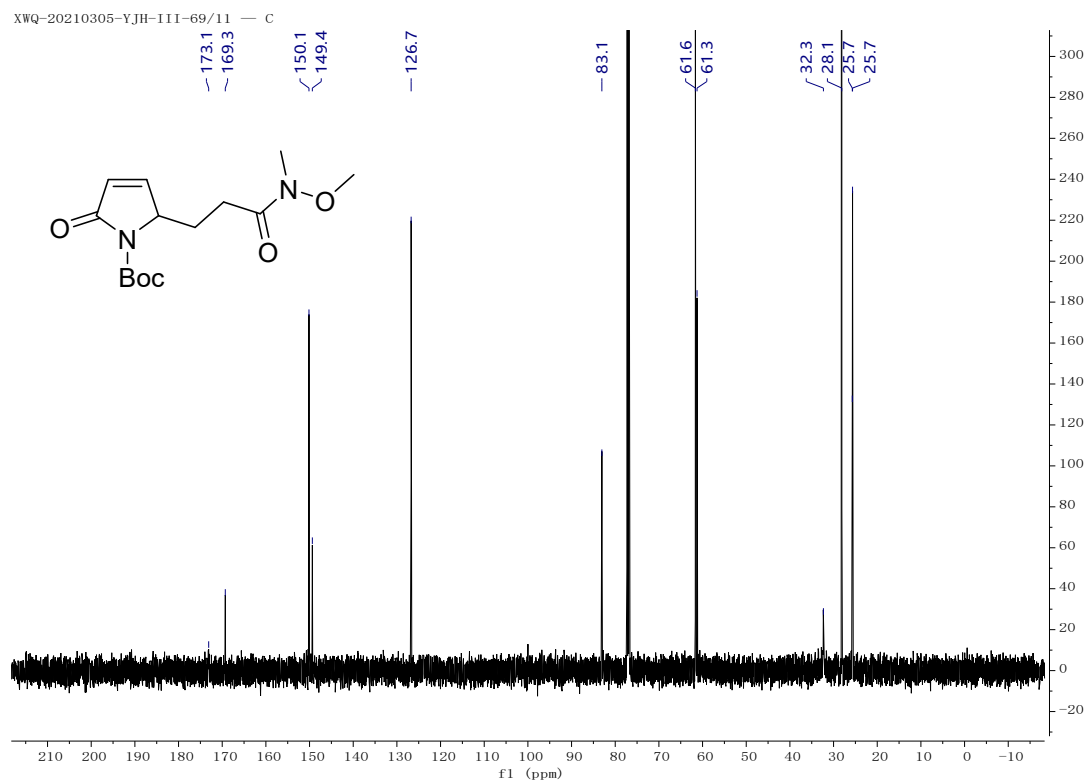

<sup>1</sup>H NMR spectrum of compound **13e** (500 MHz, Chloroform-*d*)

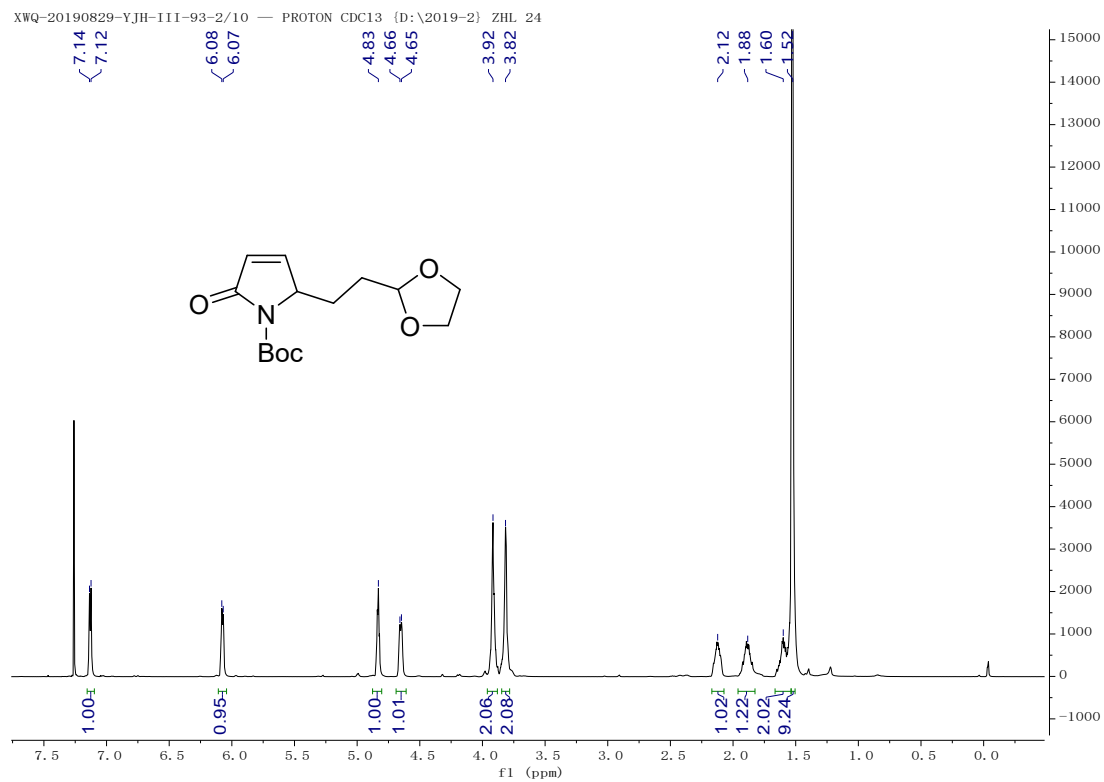

<sup>13</sup>C NMR spectrum of compound **13e** (126 MHz, Chloroform-*d*)

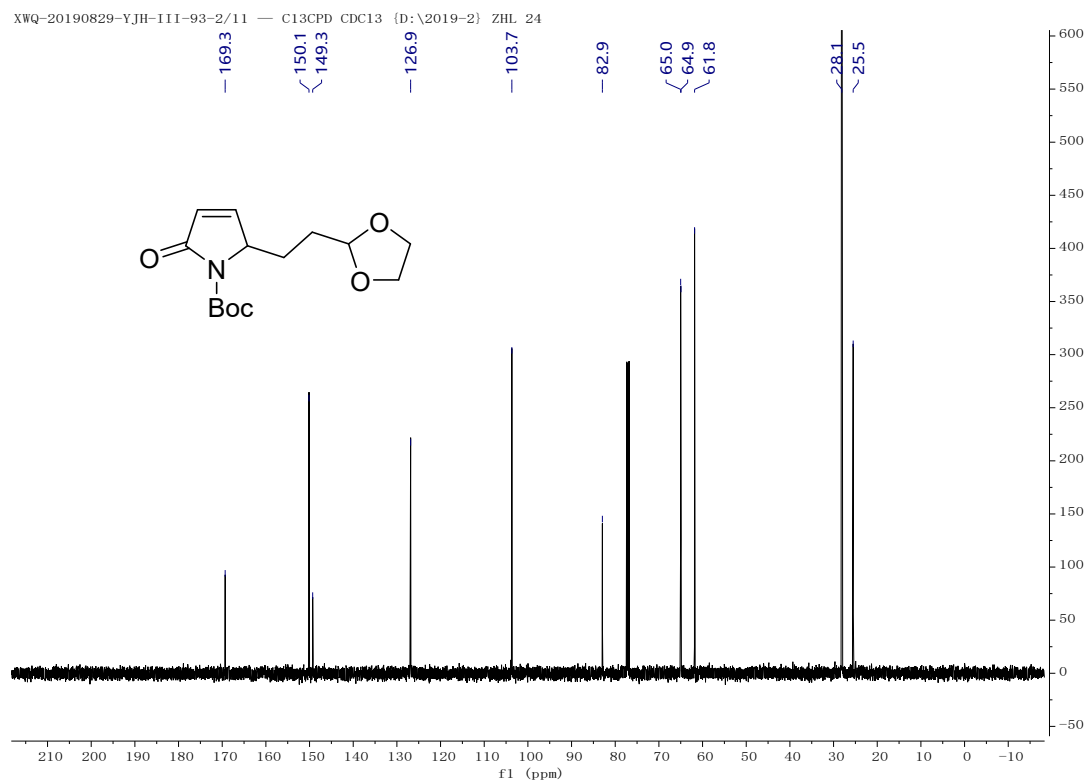

<sup>1</sup>H NMR spectrum of compound **13f** (500 MHz, Chloroform-*d*)

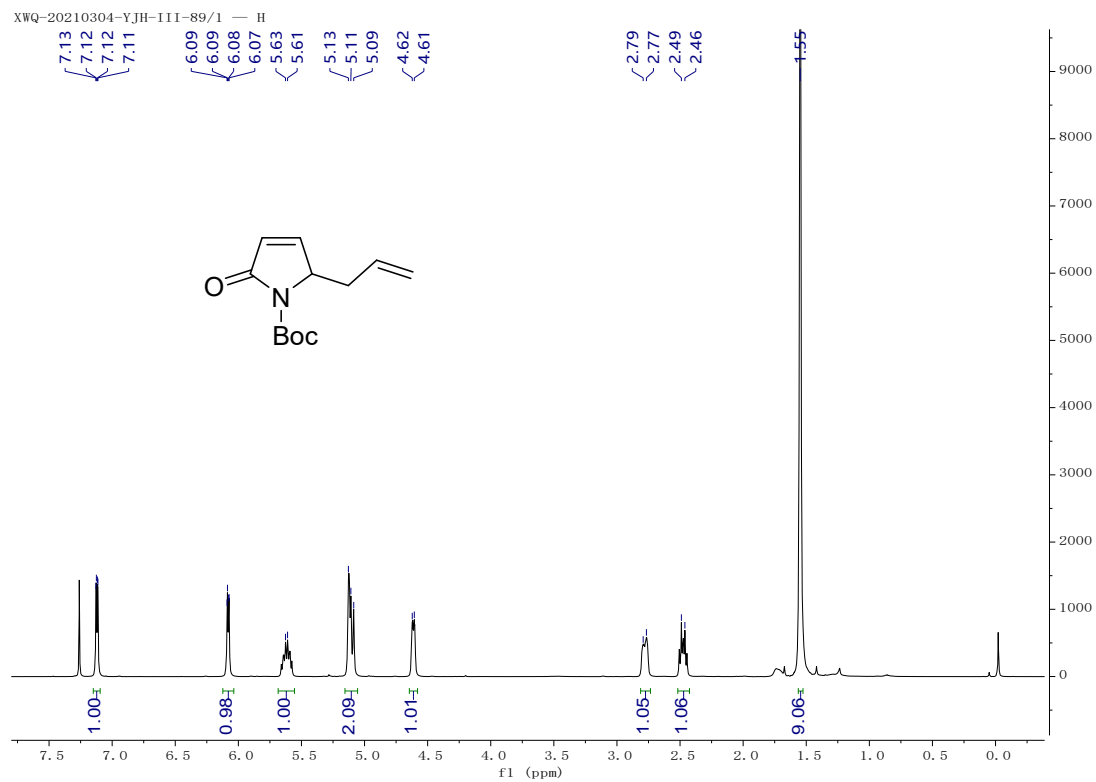

<sup>13</sup>C NMR spectrum of compound **13f** (126 MHz, Chloroform-*d*)

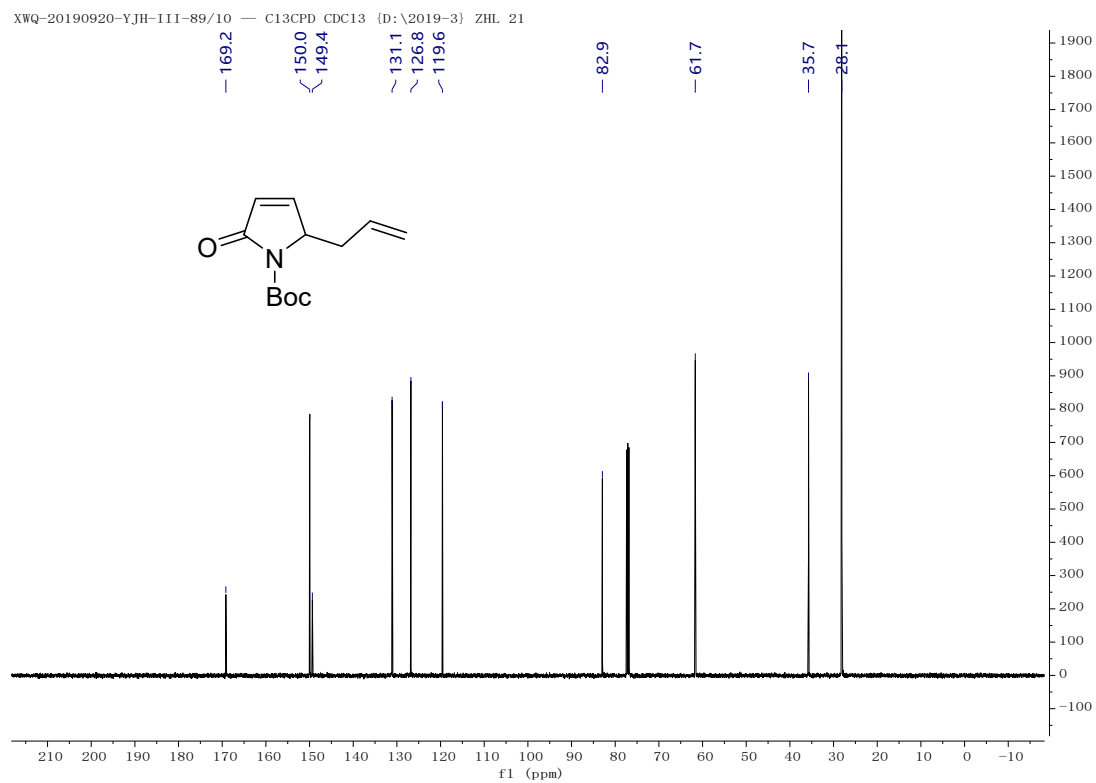

<sup>1</sup>H NMR spectrum of compound **13j** (500 MHz, Chloroform-*d*)

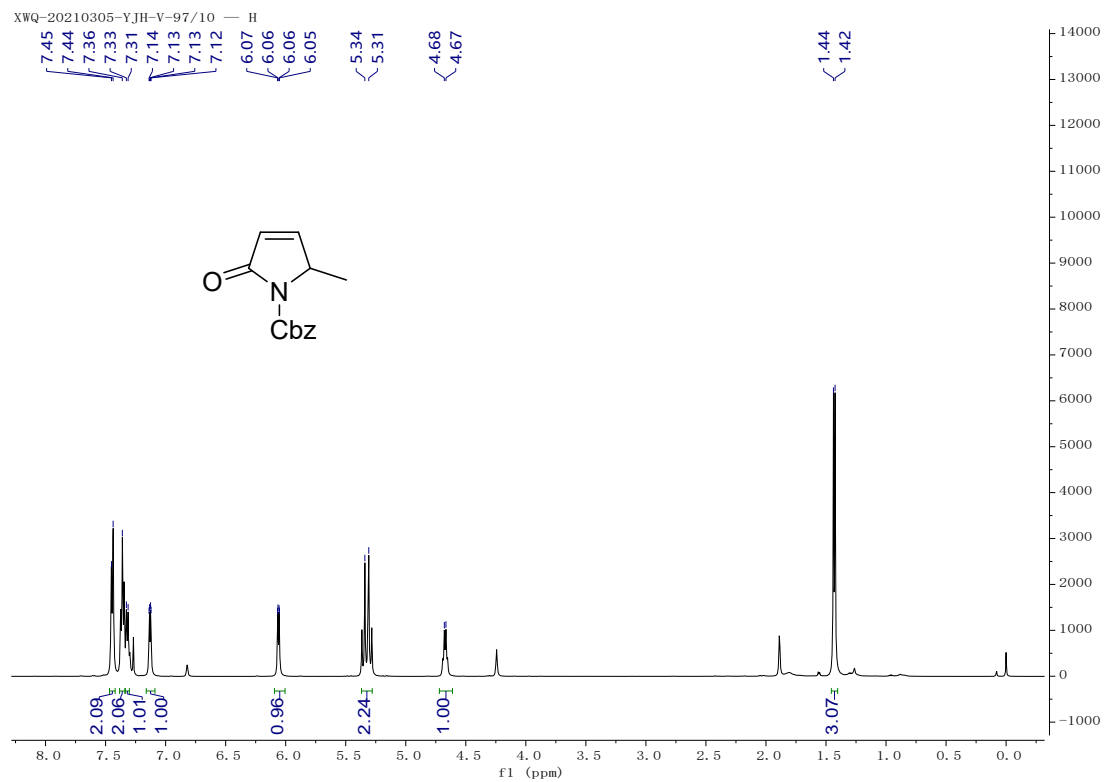

<sup>13</sup>C NMR spectrum of compound **13j** (126 MHz, Chloroform-*d*)

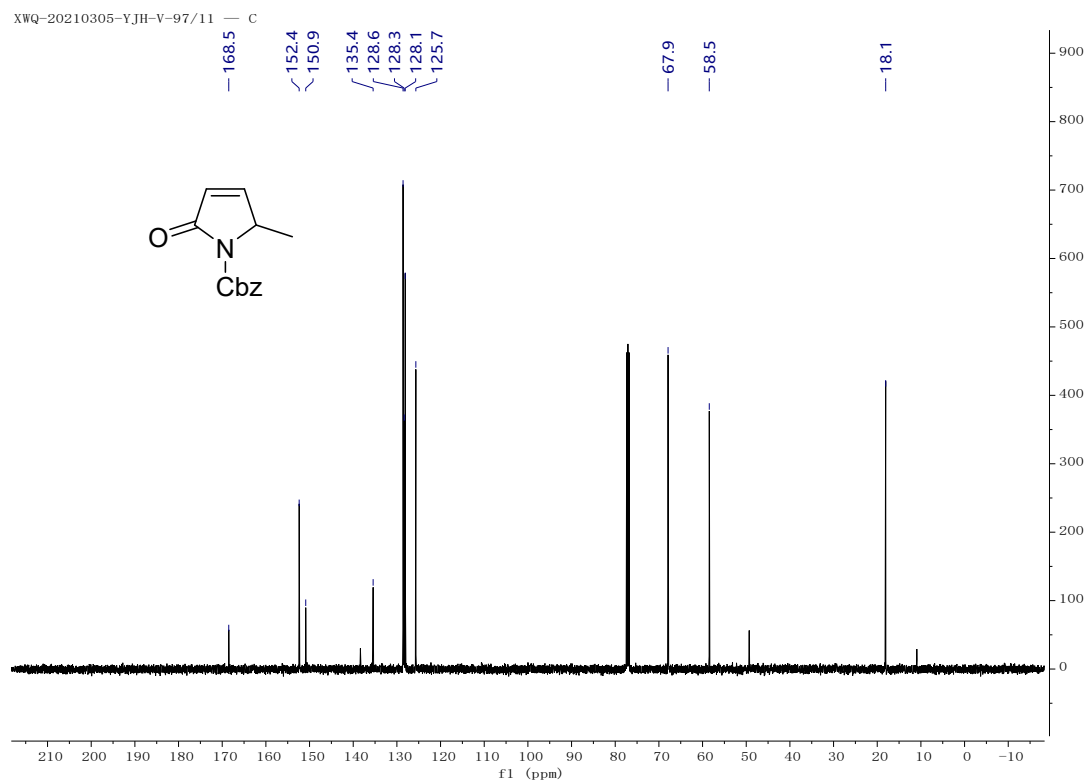

<sup>1</sup>H NMR spectrum of compound **13k** (500 MHz, Chloroform-*d*)

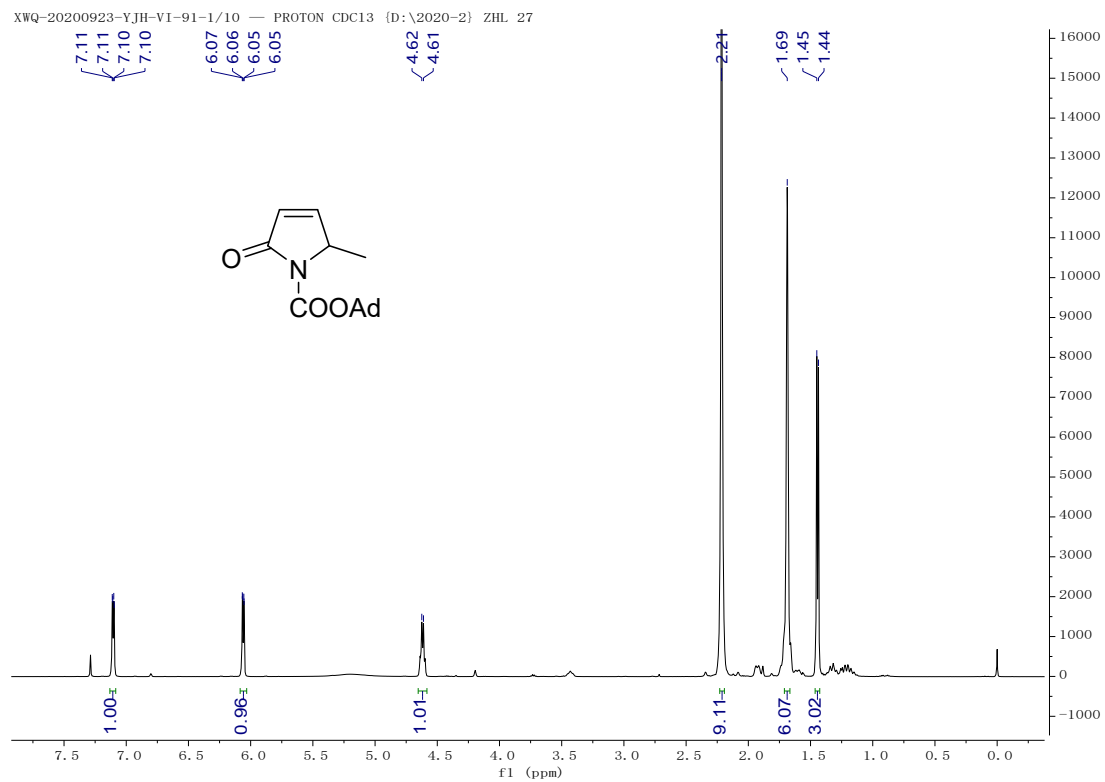

<sup>13</sup>C NMR spectrum of compound **13k** (126 MHz, Chloroform-*d*)

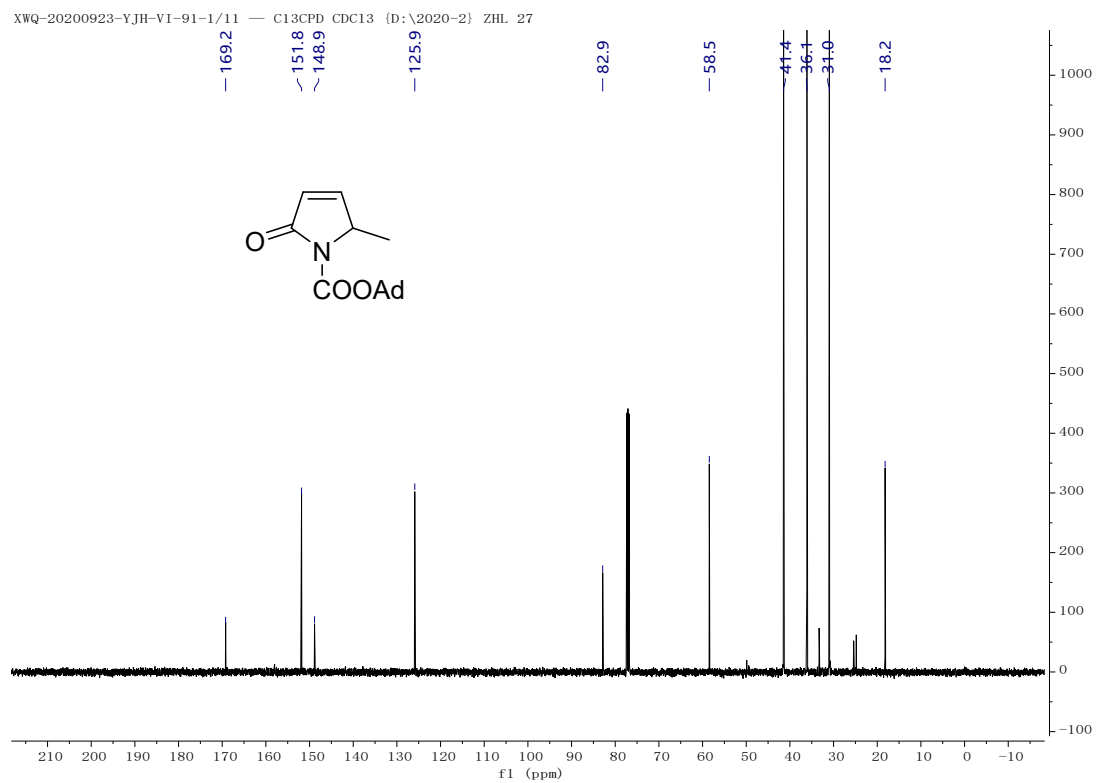

<sup>1</sup>H NMR spectrum of compound **131** (500 MHz, Chloroform-*d*)

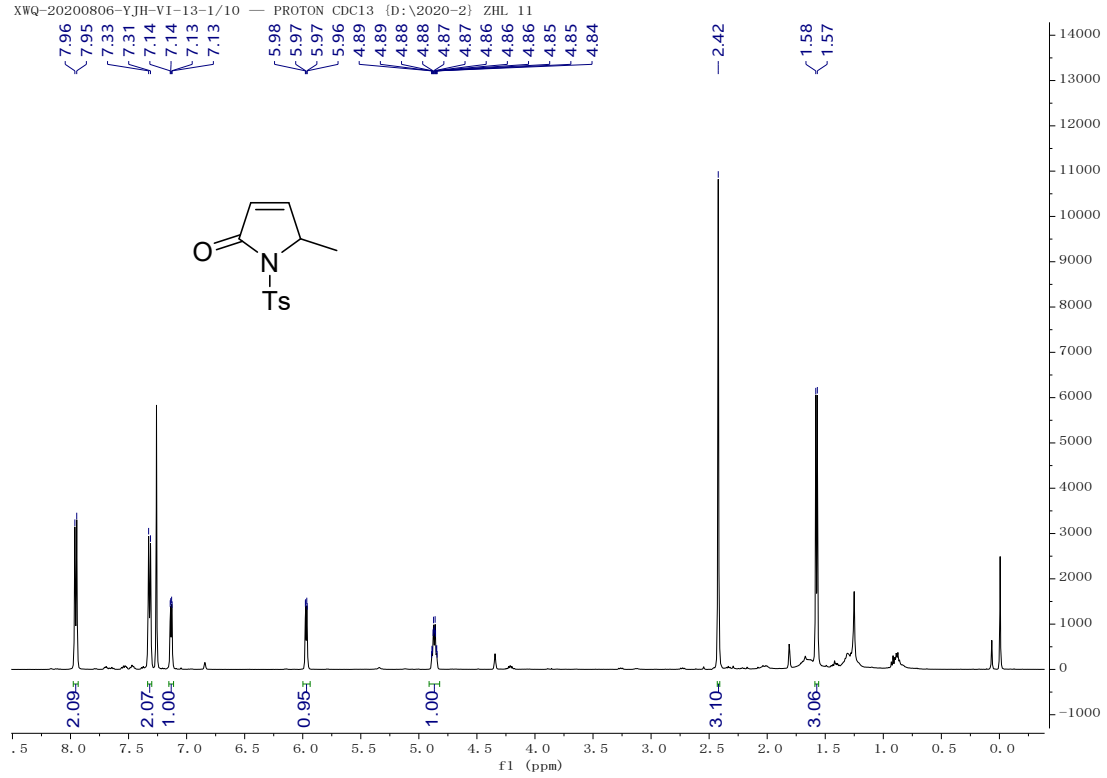

<sup>13</sup>C NMR spectrum of compound **131** (126 MHz, Chloroform-*d*)

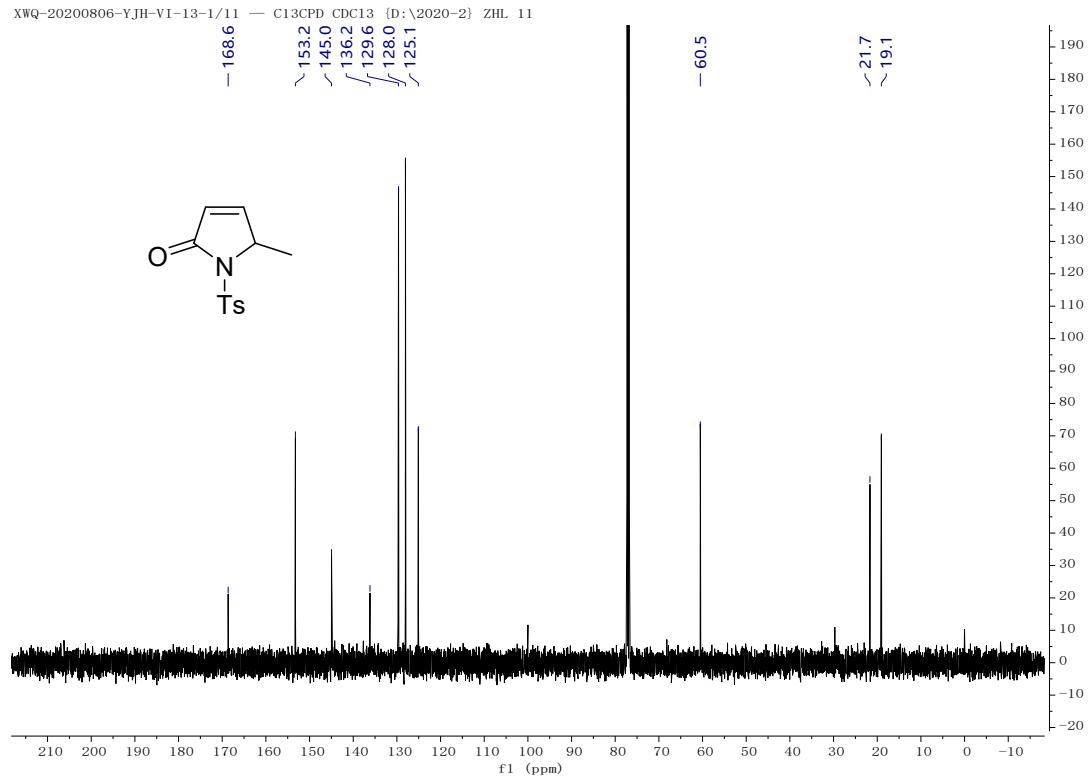

<sup>1</sup>H NMR spectrum of compound **13m** (500 MHz, Chloroform-*d*)

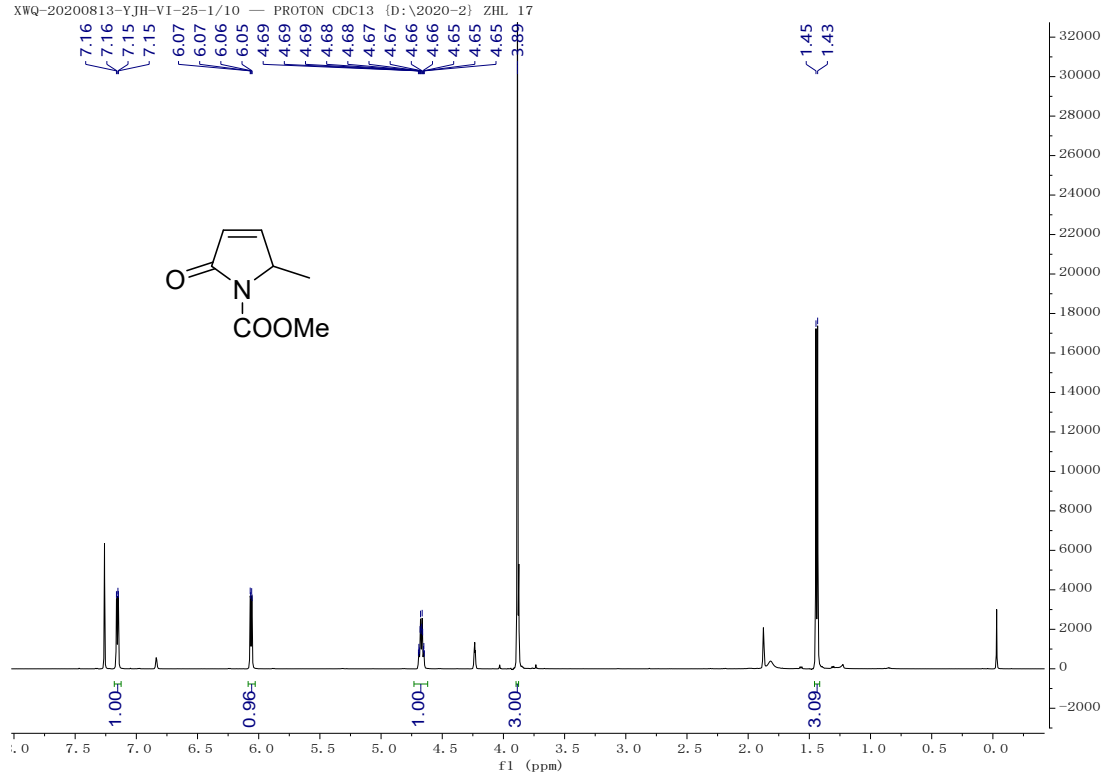

<sup>13</sup>C NMR spectrum of compound **13m** (126 MHz, Chloroform-*d*)

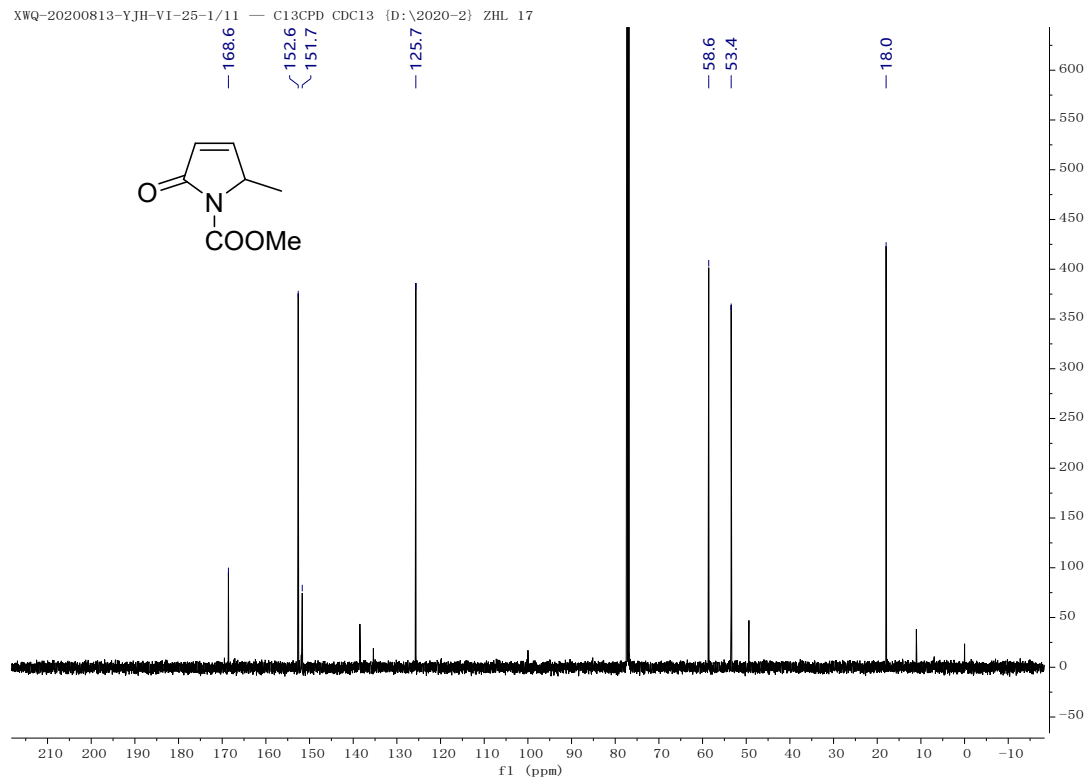



<sup>1</sup>H NMR spectrum of compound **13n** (500 MHz, Chloroform-*d*)

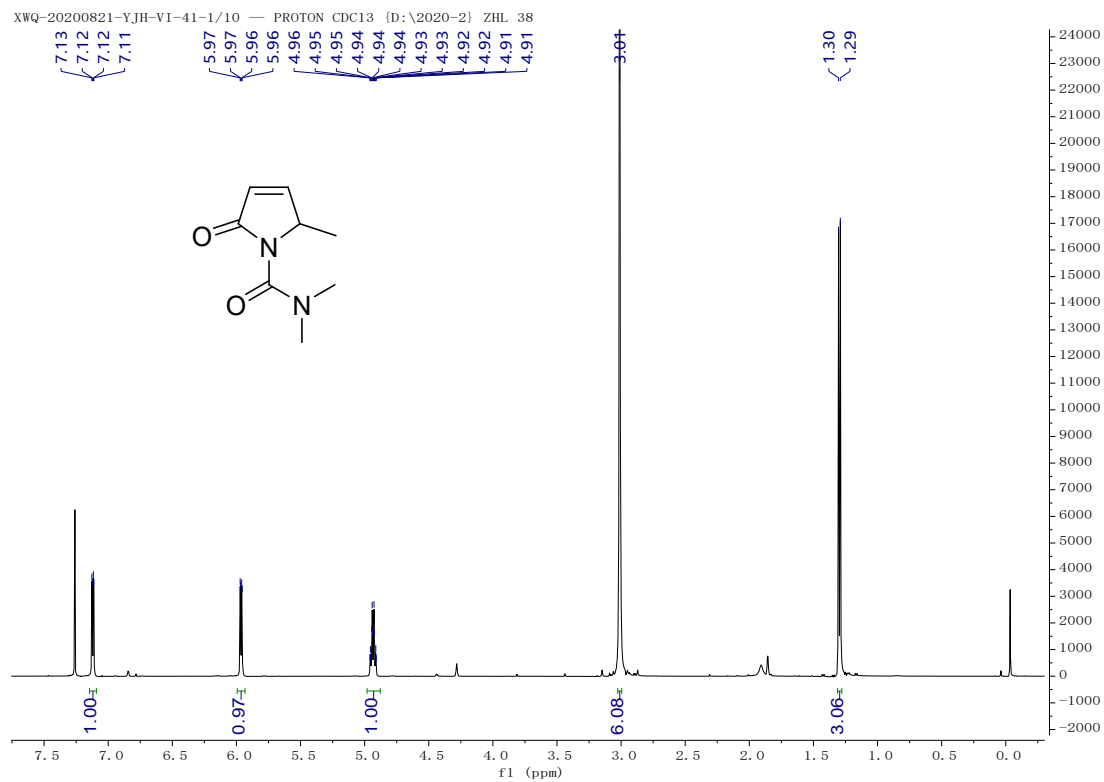

<sup>13</sup>C NMR spectrum of compound **13n** (126 MHz, Chloroform-*d*)

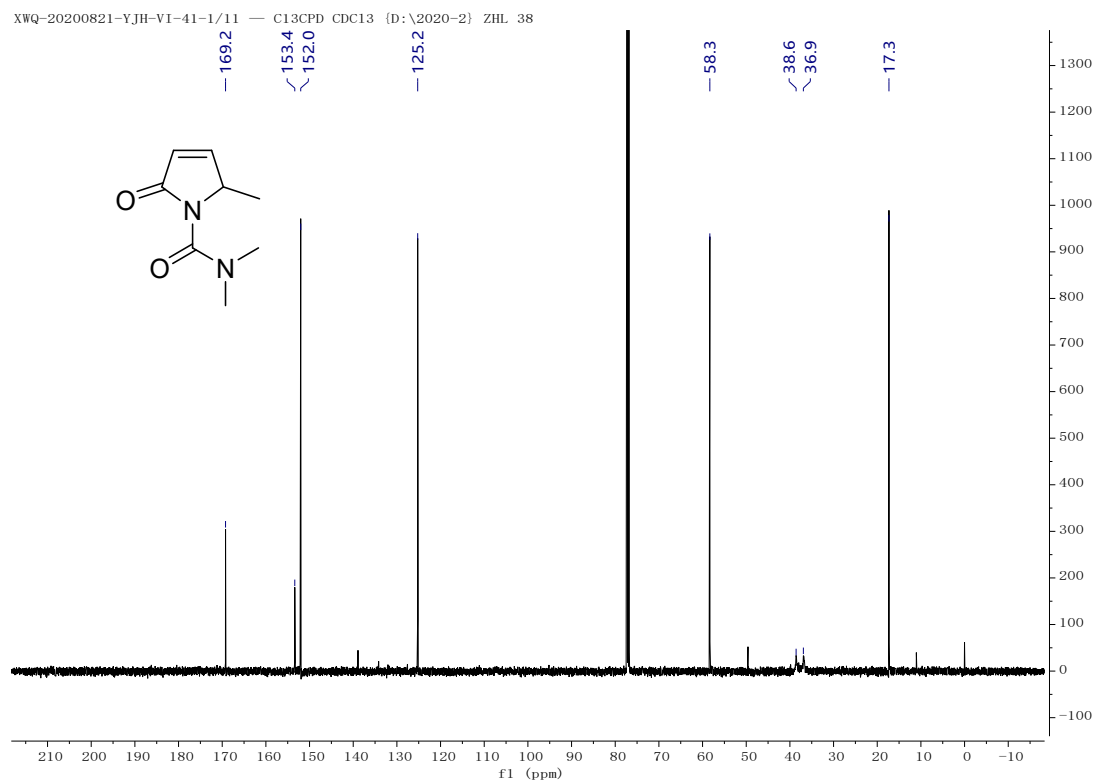

<sup>1</sup>H NMR spectrum of compound S8j (500 MHz, Chloroform-d)

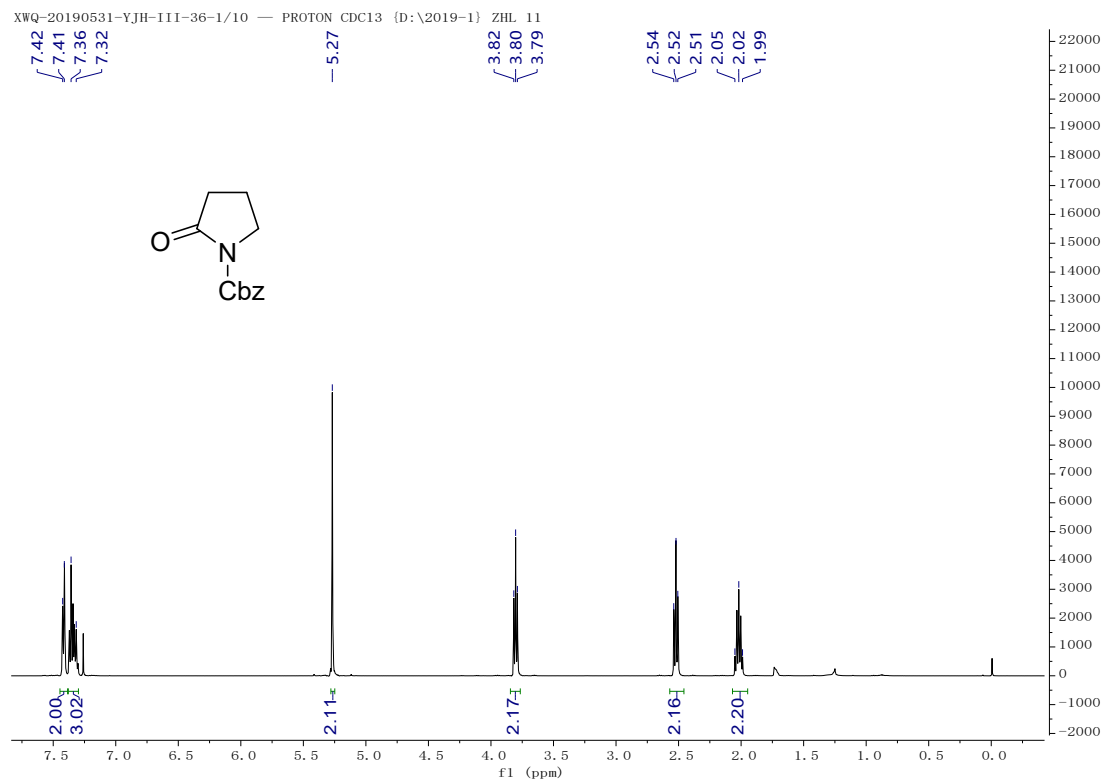

<sup>13</sup>C NMR spectrum of compound S8j (126 MHz, Chloroform-d)

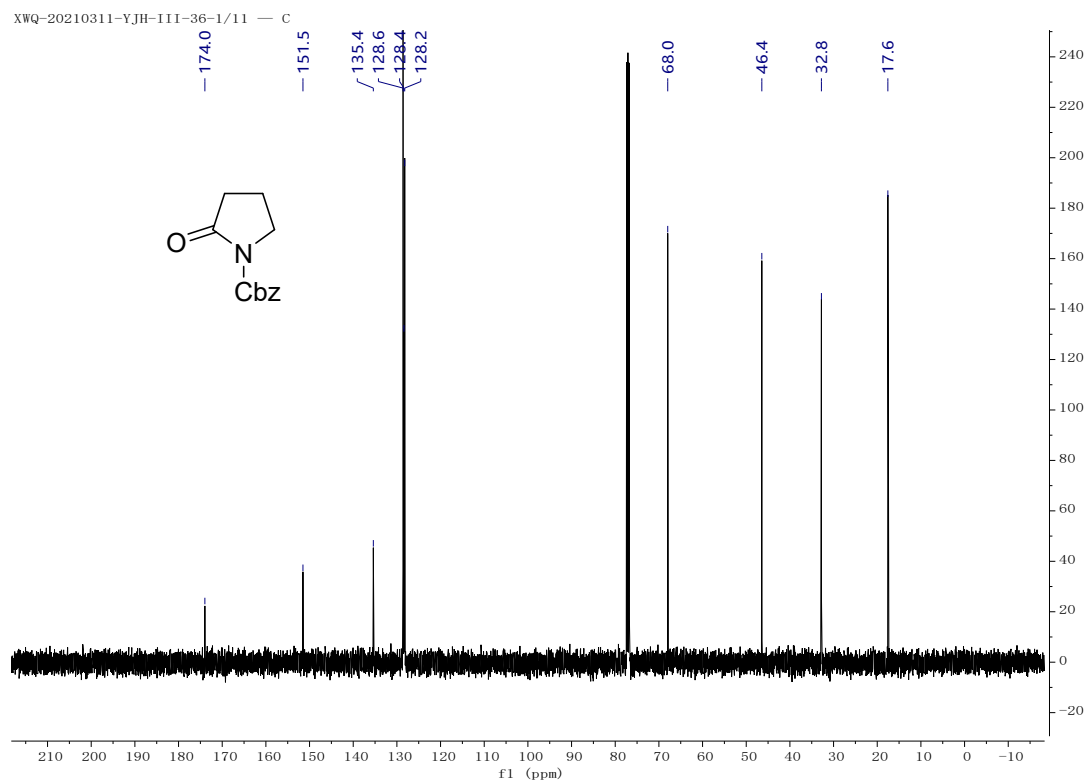

<sup>1</sup>H NMR spectrum of compound S9j (500 MHz, Chloroform-*d*)

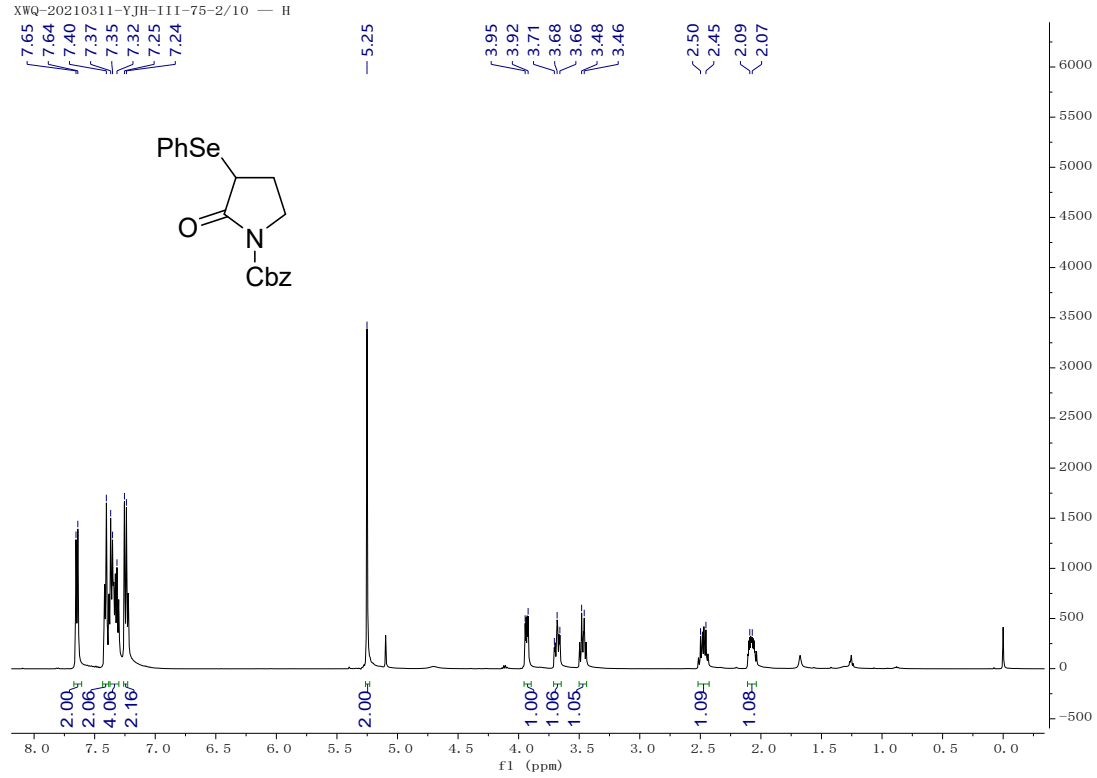

<sup>13</sup>C NMR spectrum of compound S9j (126 MHz, Chloroform-*d*)

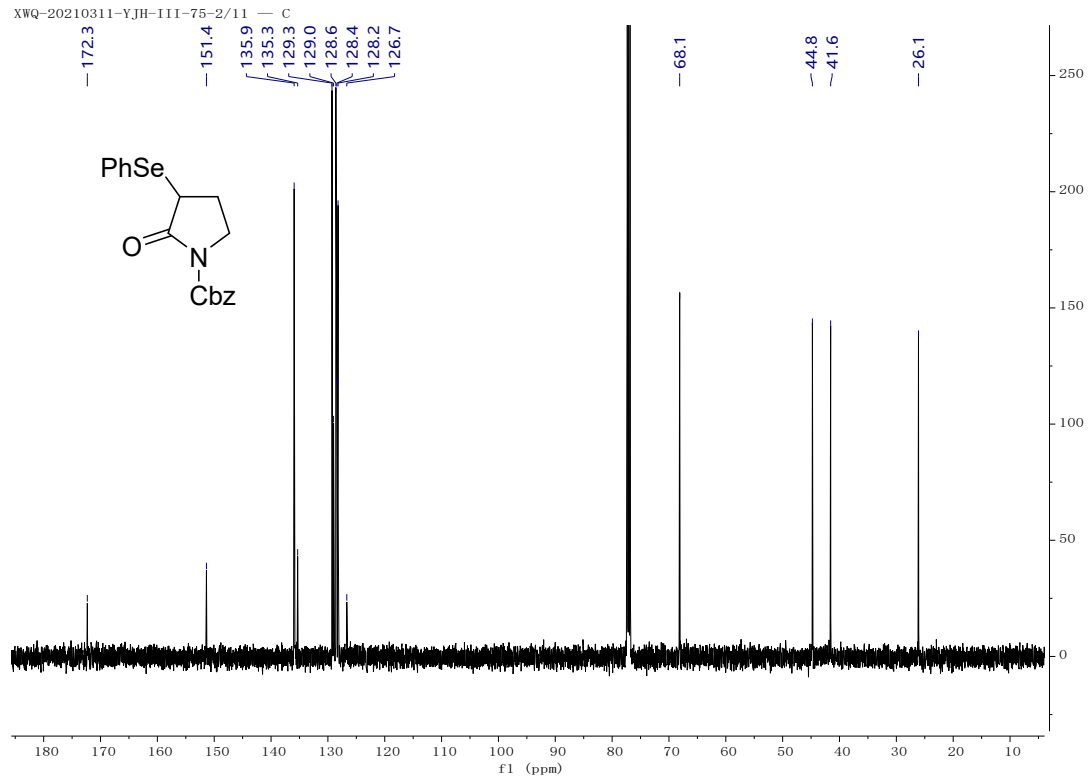

<sup>1</sup>H NMR spectrum of compound **S10j** (500 MHz, Chloroform-*d*)

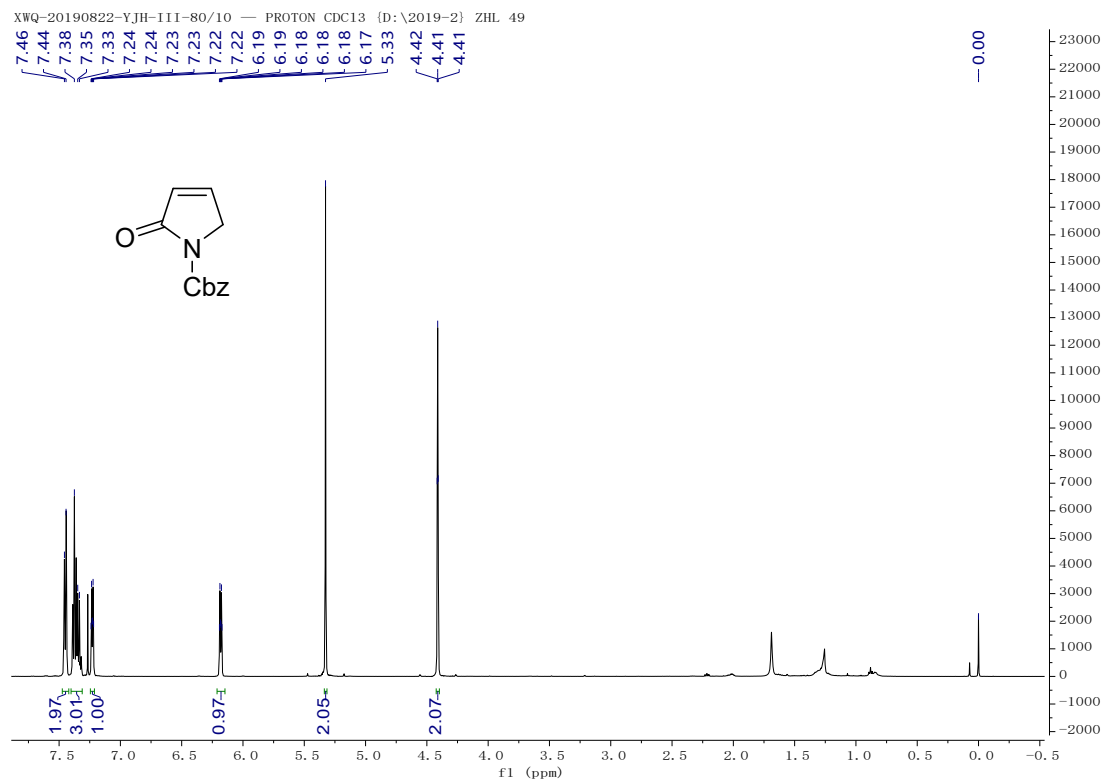

<sup>13</sup>C NMR spectrum of compound **S10j** (126 MHz, Chloroform-*d*)

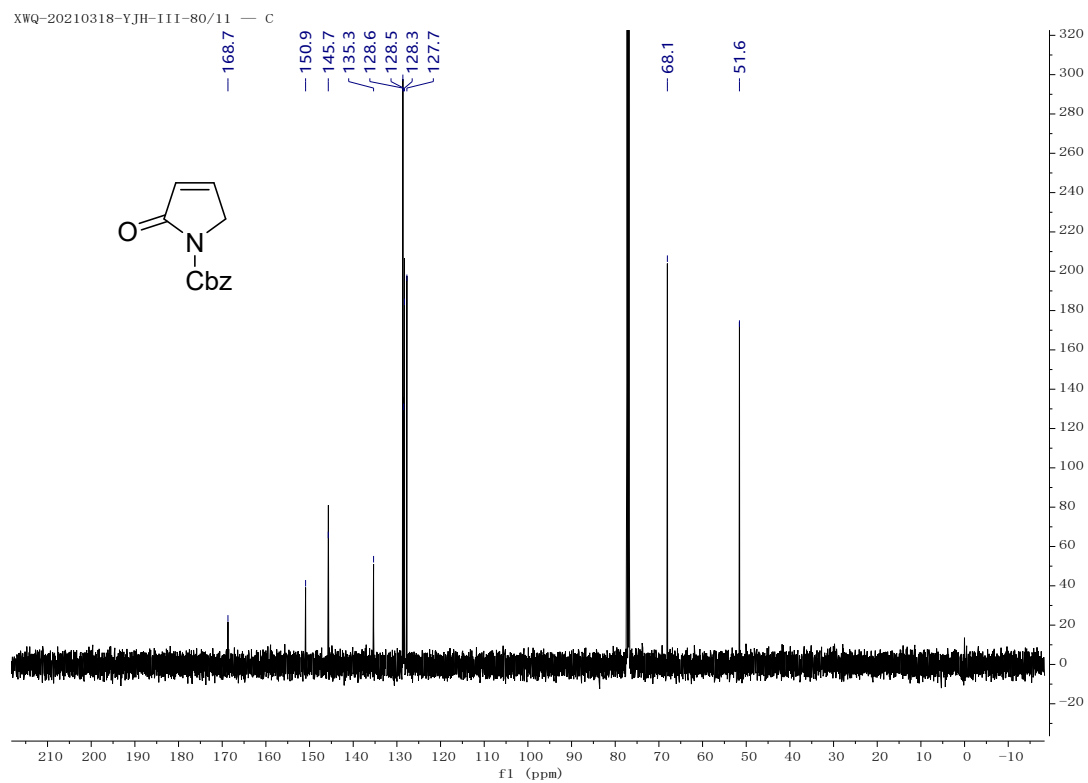

<sup>1</sup>H NMR spectrum of compound **S8k** (500 MHz, Chloroform-*d*)

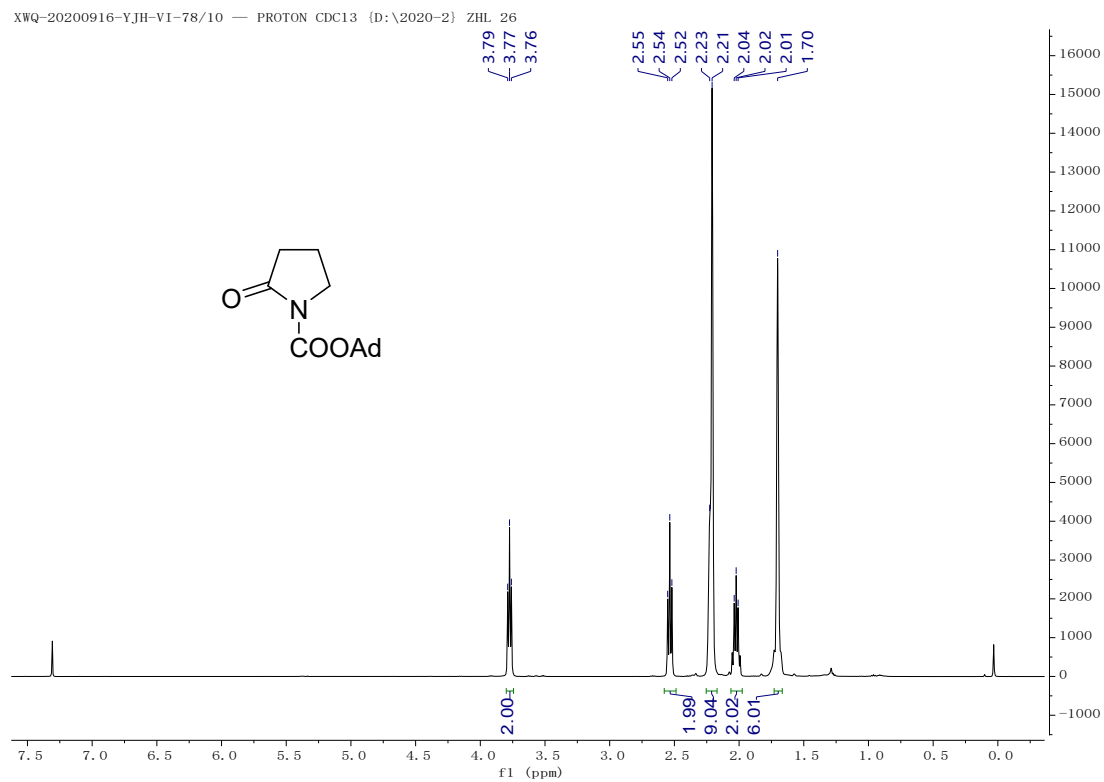

<sup>13</sup>C NMR spectrum of compound **S8k** (126 MHz, Chloroform-*d*)

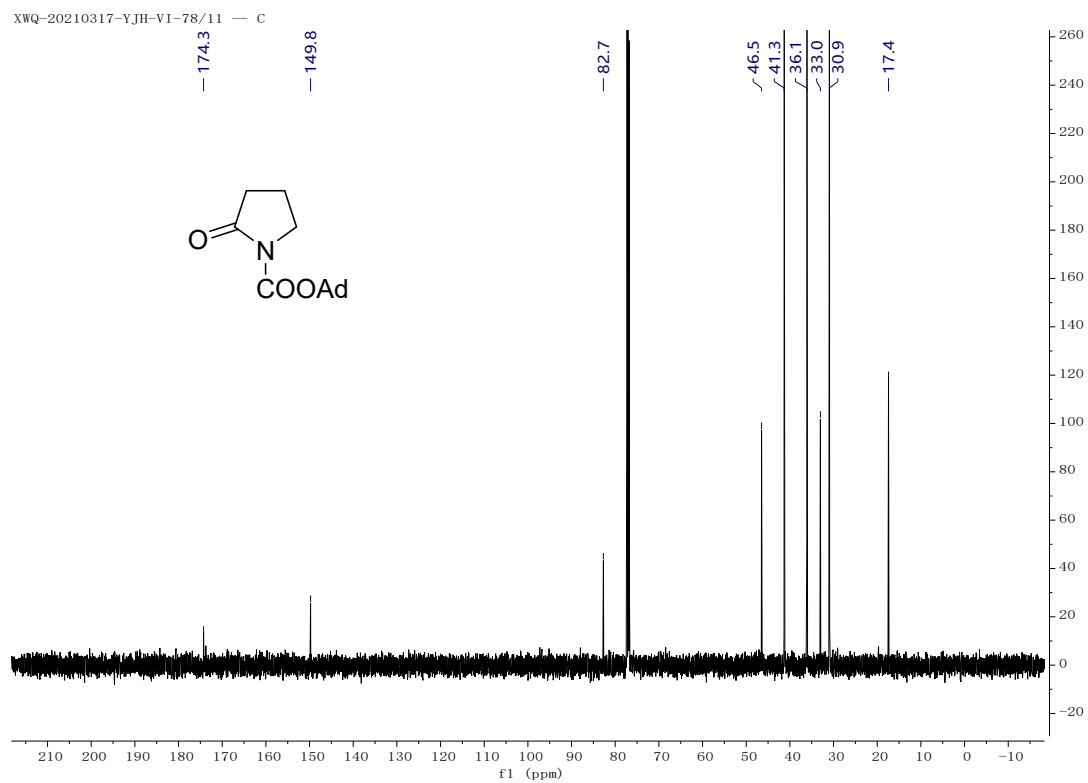

<sup>1</sup>H NMR spectrum of compound **S9k** (500 MHz, Chloroform-*d*)

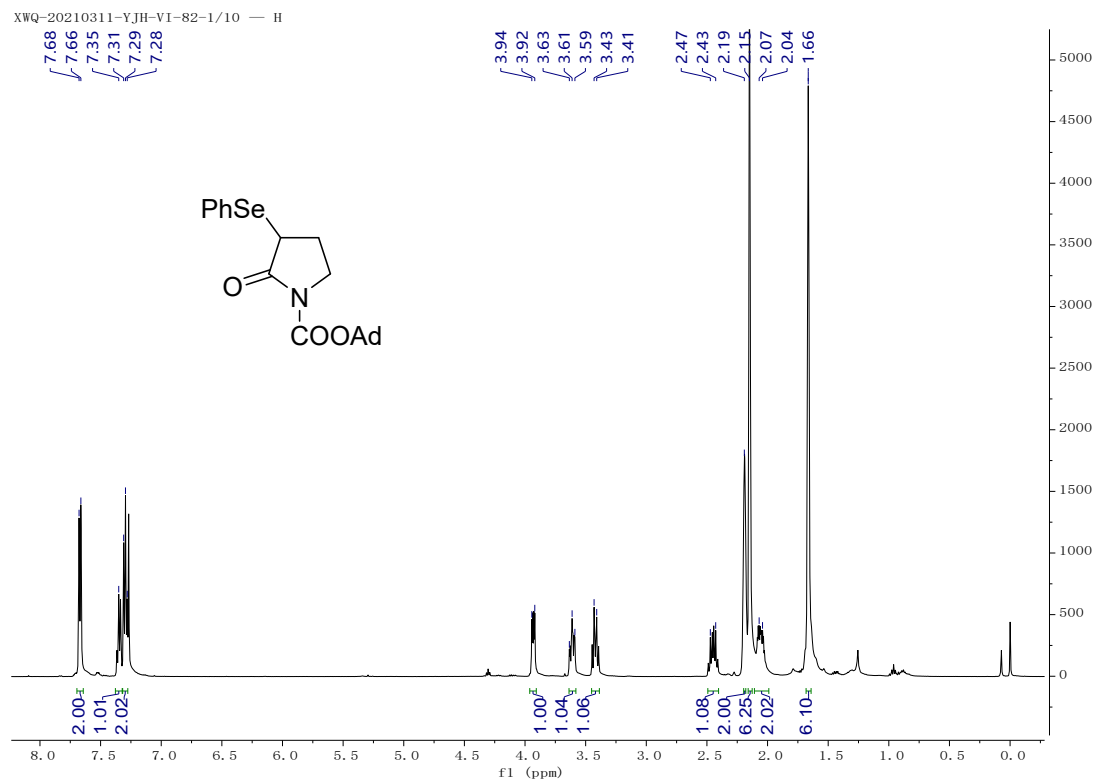

<sup>13</sup>C NMR spectrum of compound **S9k** (126 MHz, Chloroform-*d*)

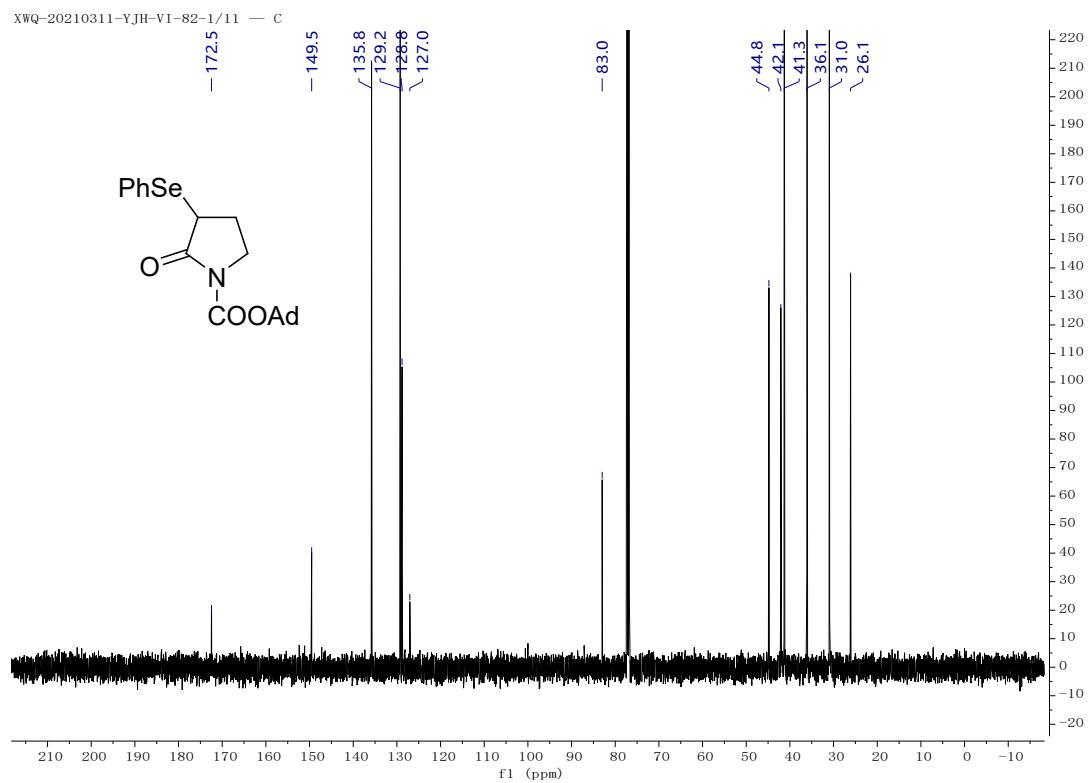

<sup>1</sup>H NMR spectrum of compound **S10k** (500 MHz, Chloroform-*d*)

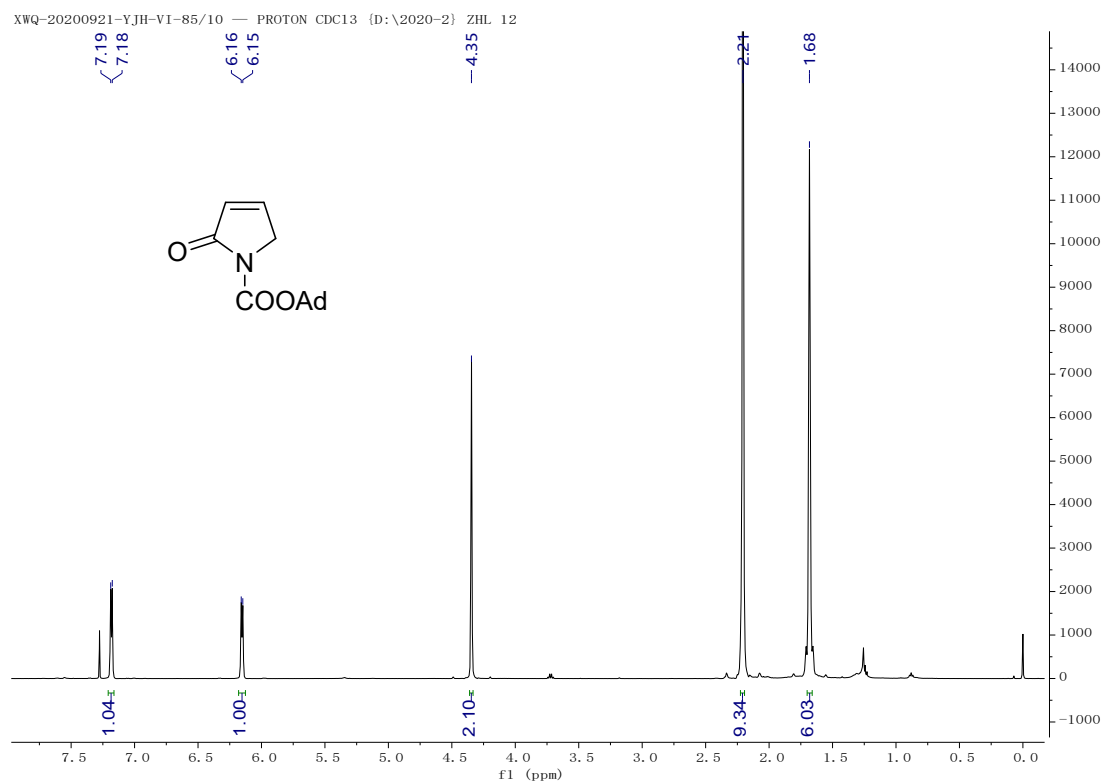

<sup>13</sup>C NMR spectrum of compound **S10k** (126 MHz, Chloroform-*d*)

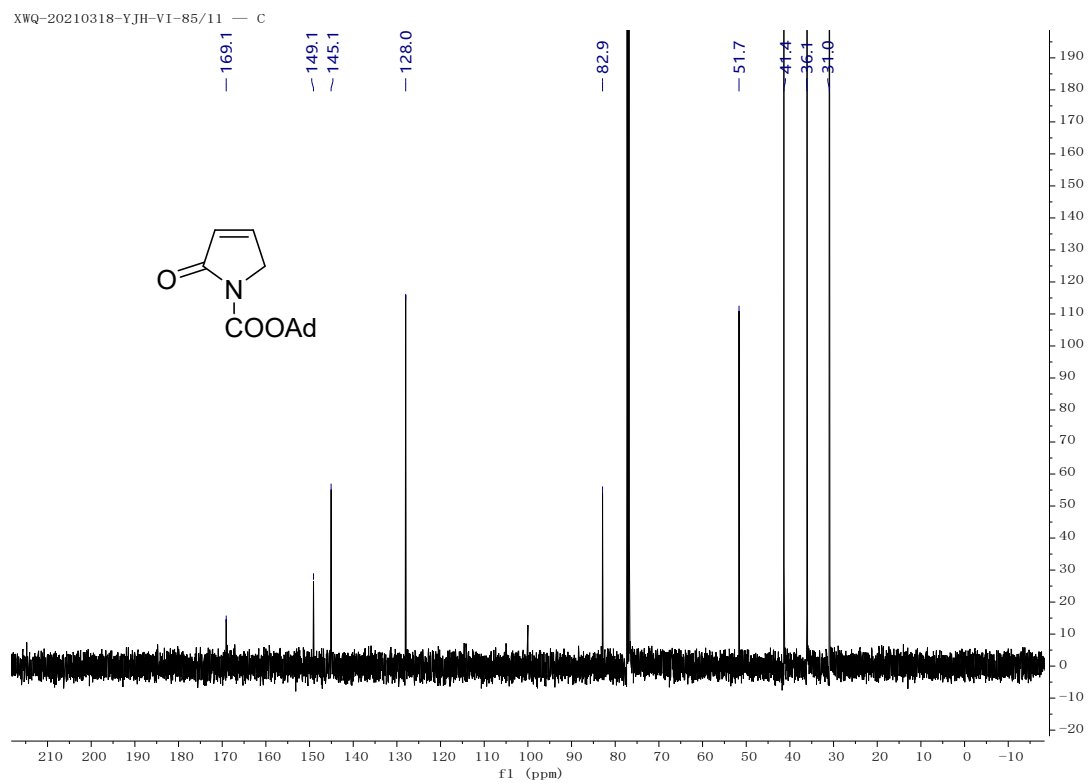

<sup>1</sup>H NMR spectrum of compound S81 (500 MHz, Chloroform-*d*)

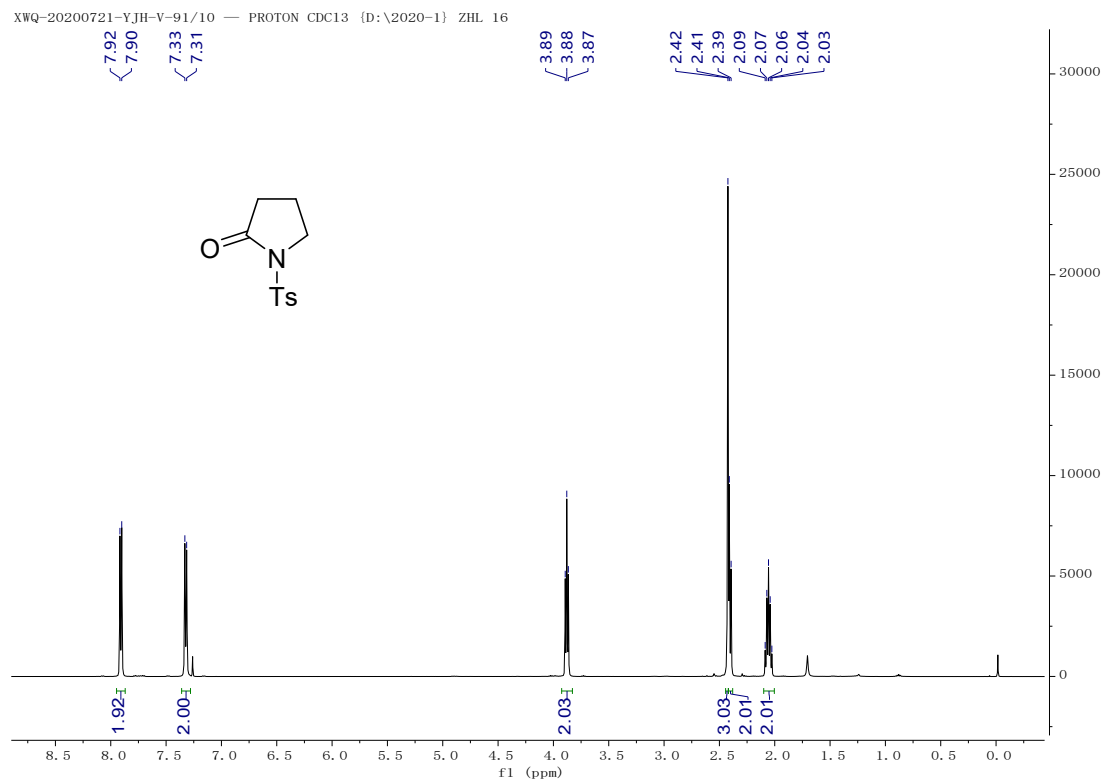

<sup>13</sup>C NMR spectrum of compound S81 (126 MHz, Chloroform-*d*)

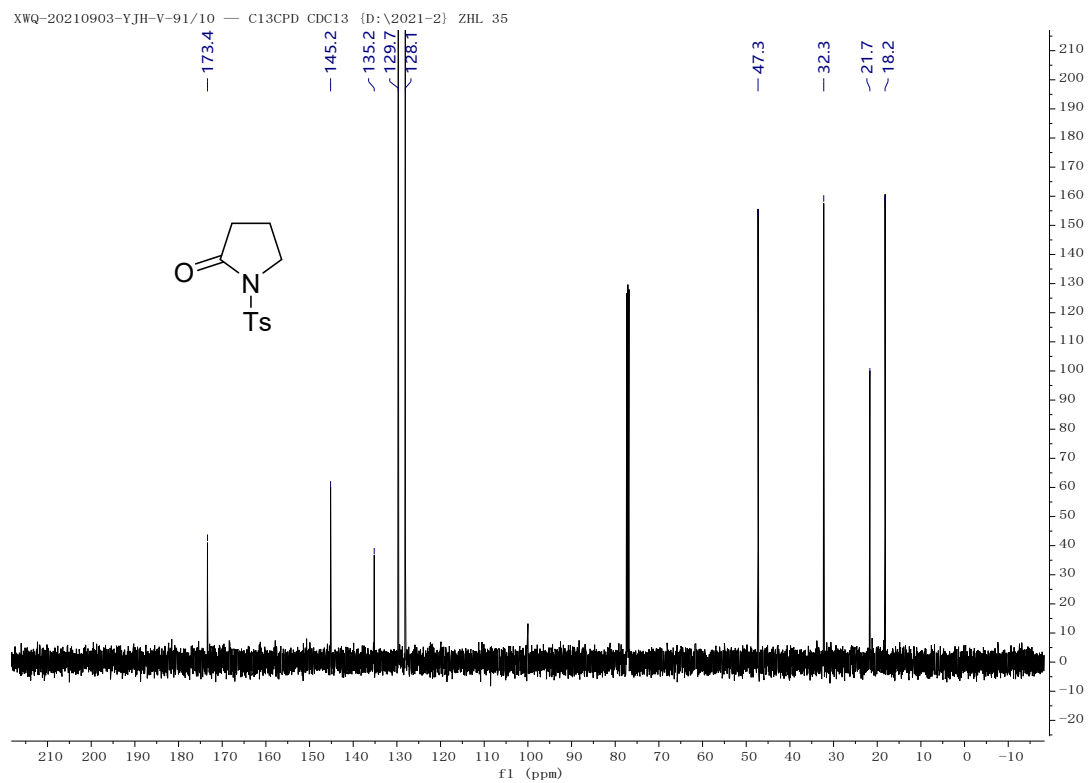



<sup>1</sup>H NMR spectrum of compound S9I (500 MHz, Chloroform-*d*)

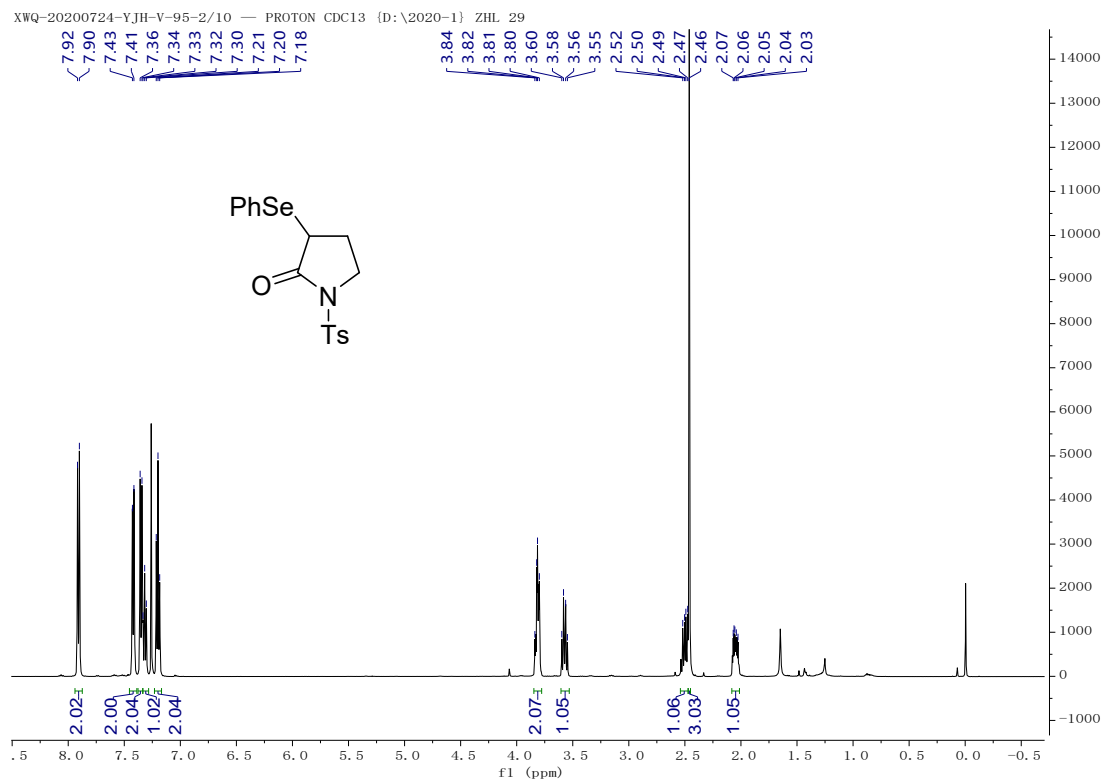

<sup>13</sup>C NMR spectrum of compound S9I (126 MHz, Chloroform-*d*)

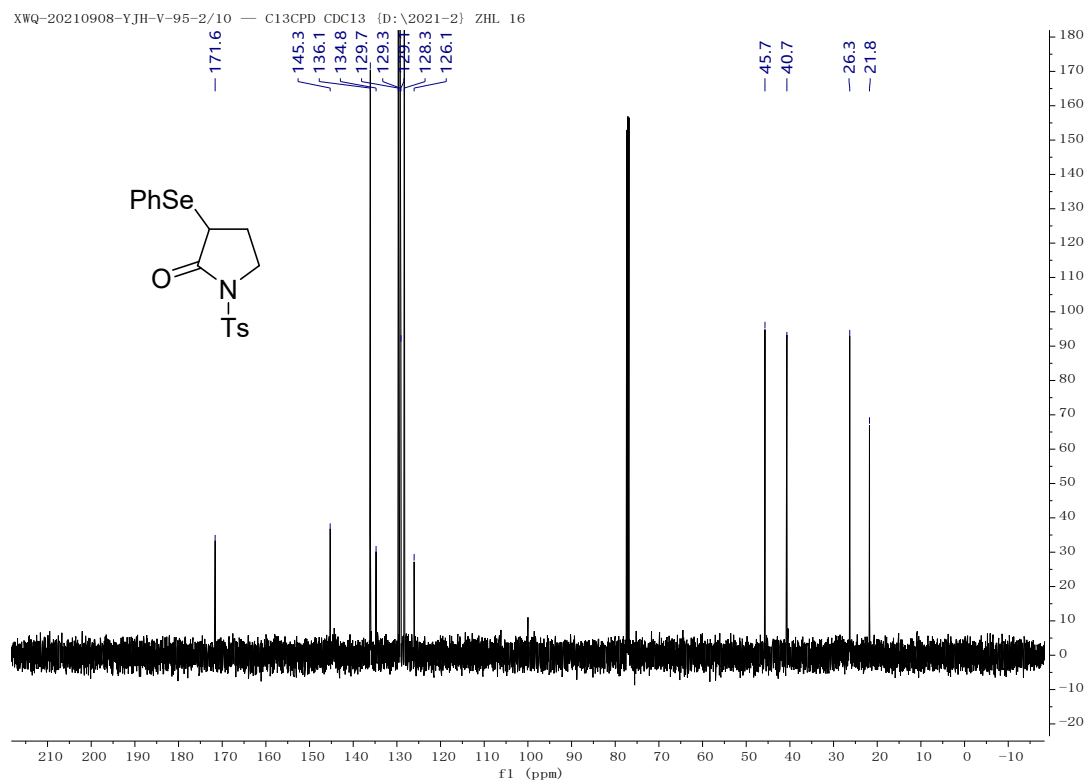

<sup>1</sup>H NMR spectrum of compound **S101** (500 MHz, Chloroform-*d*)

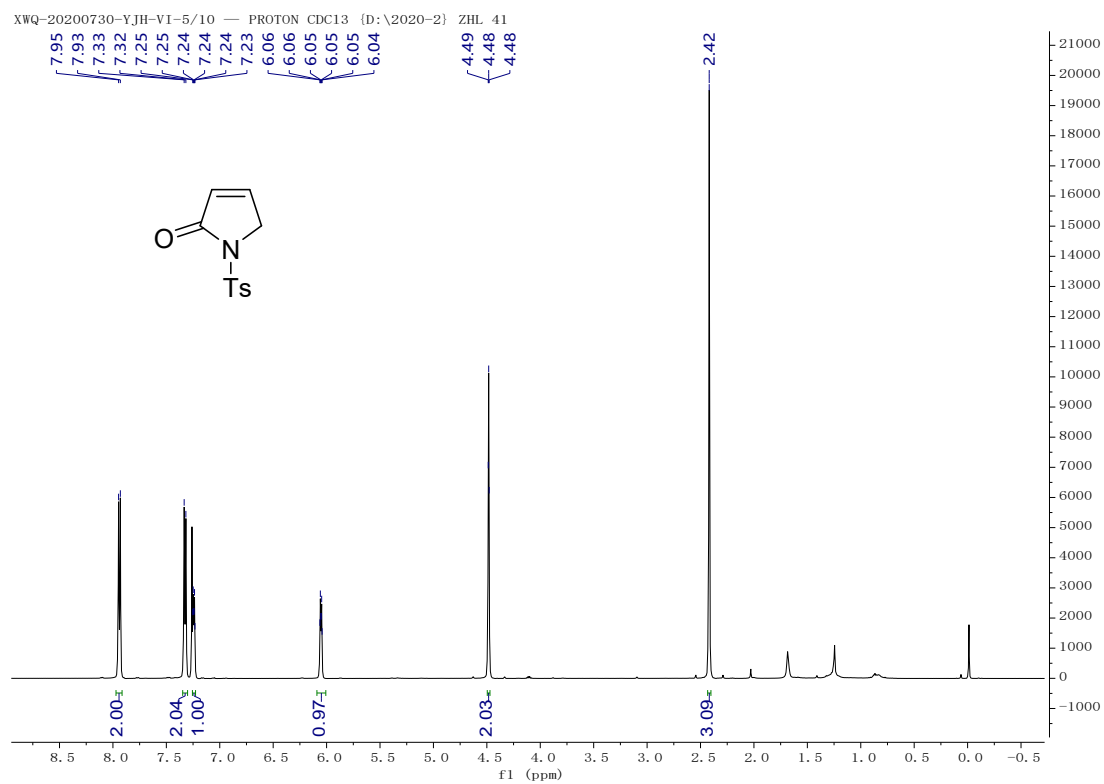

<sup>13</sup>C NMR spectrum of compound **S101** (126 MHz, Chloroform-*d*)

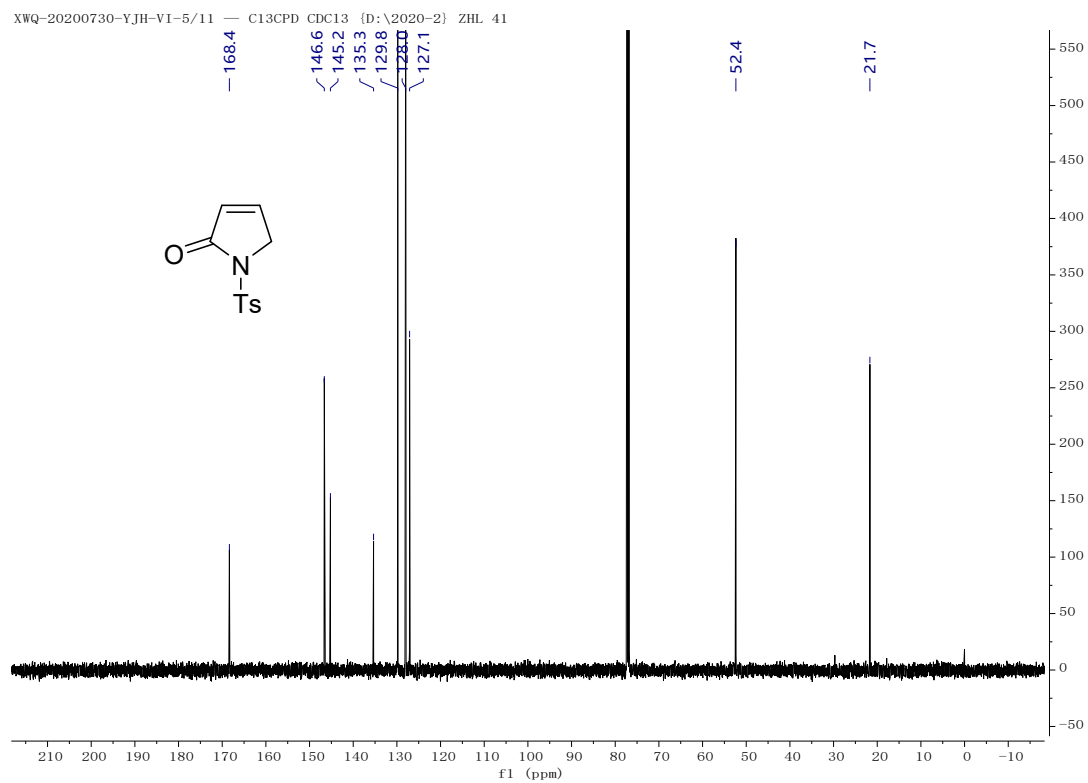

<sup>1</sup>H NMR spectrum of compound **S8m** (500 MHz, Chloroform-*d*)

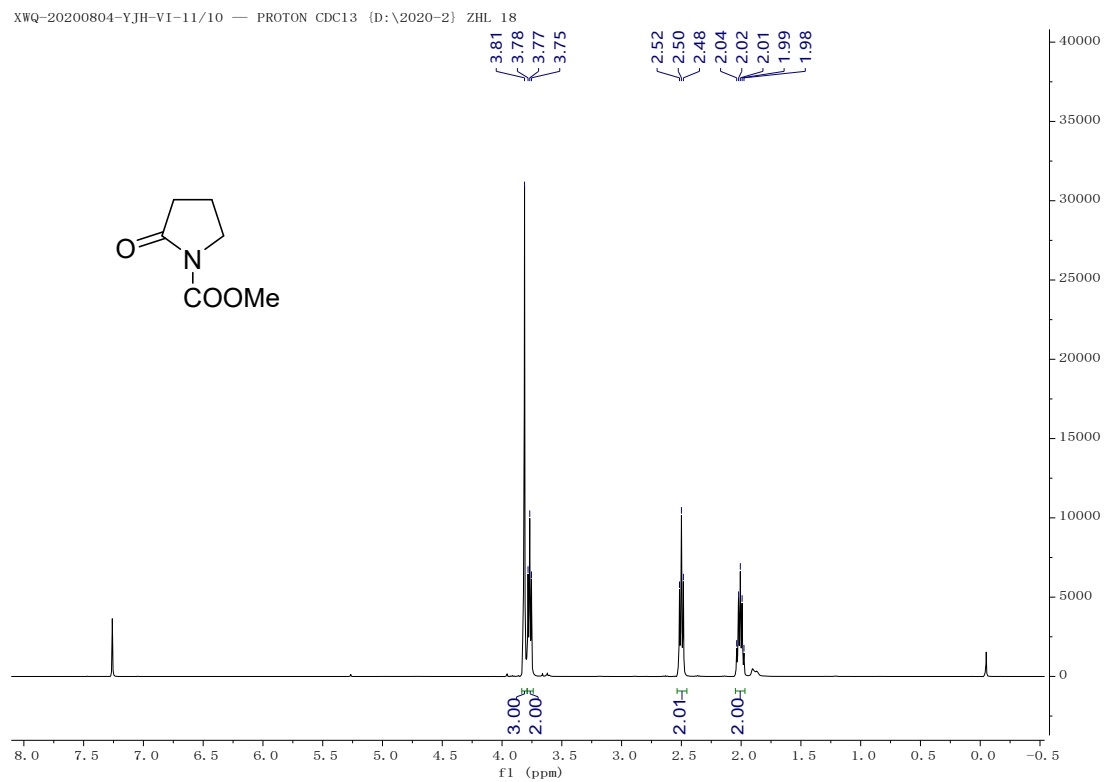

<sup>13</sup>C NMR spectrum of compound **S8m** (126 MHz, Chloroform-*d*)

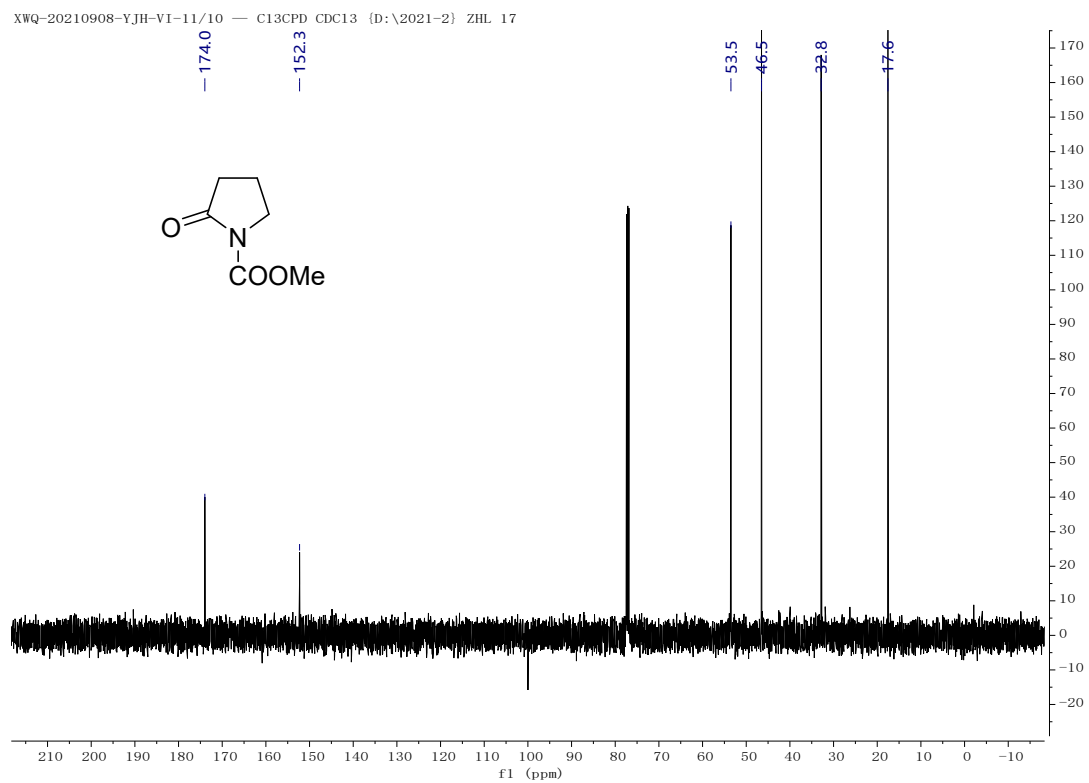

<sup>1</sup>H NMR spectrum of compound **S9m** (500 MHz, Chloroform-*d*)

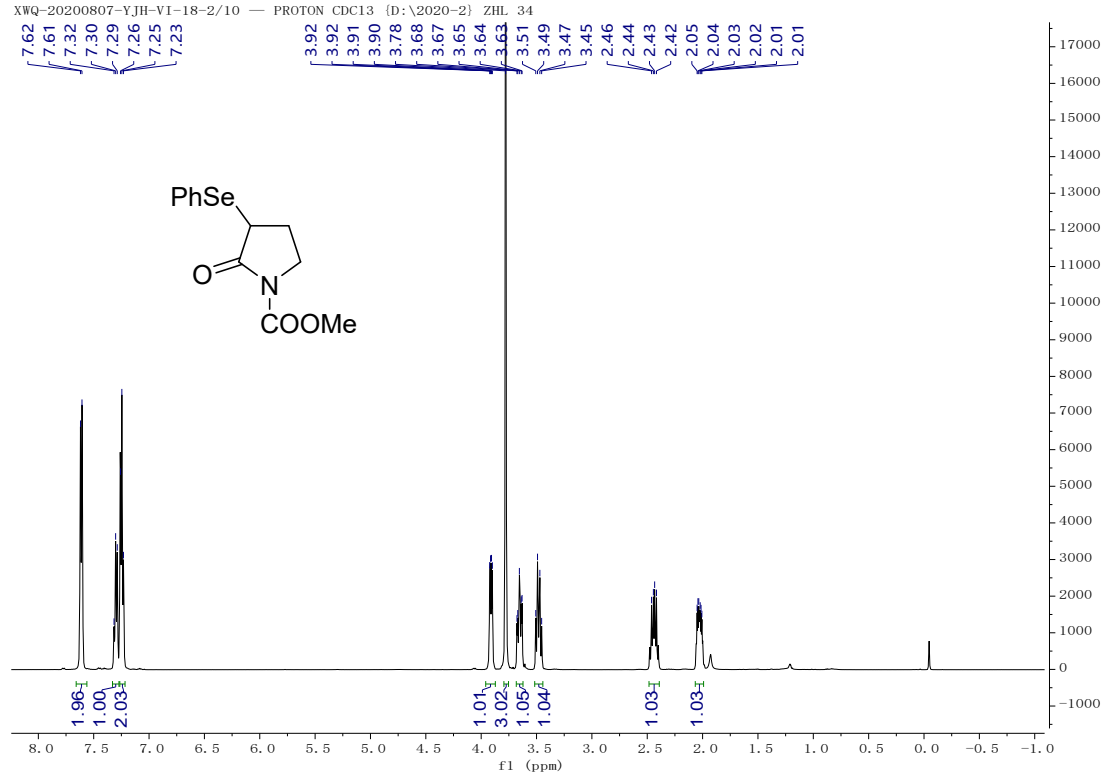

<sup>13</sup>C NMR spectrum of compound **S9m** (126 MHz, Chloroform-*d*)

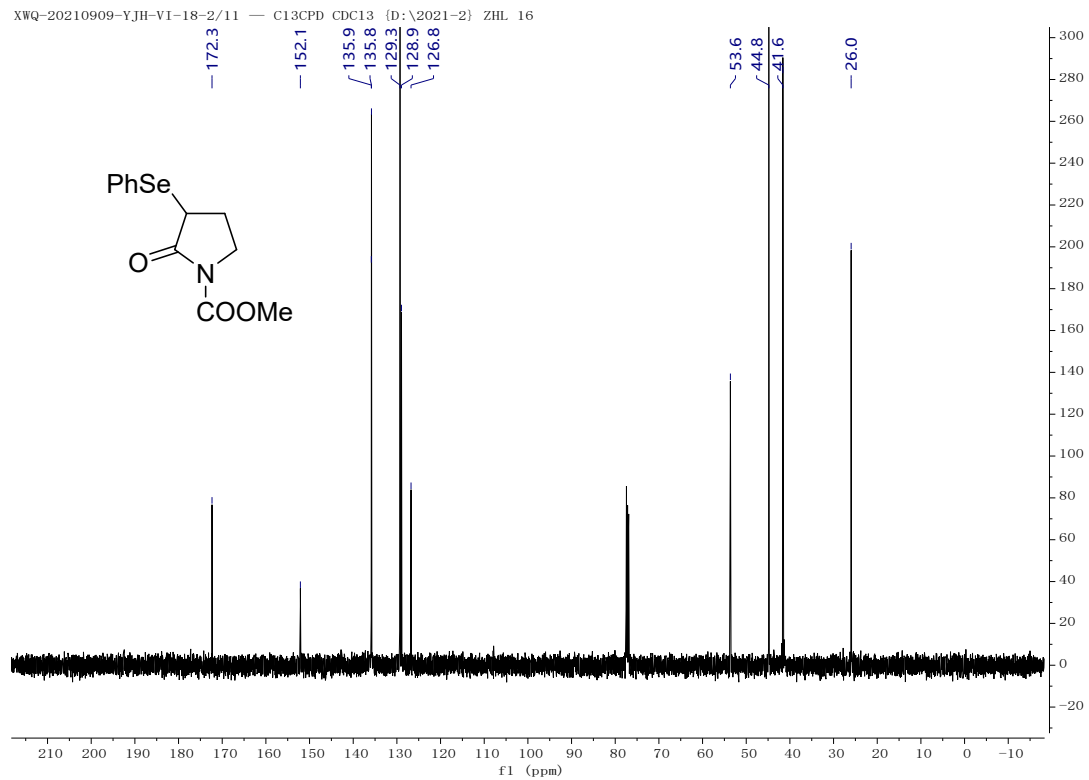

<sup>1</sup>H NMR spectrum of compound **S10m** (500 MHz, Chloroform-*d*)

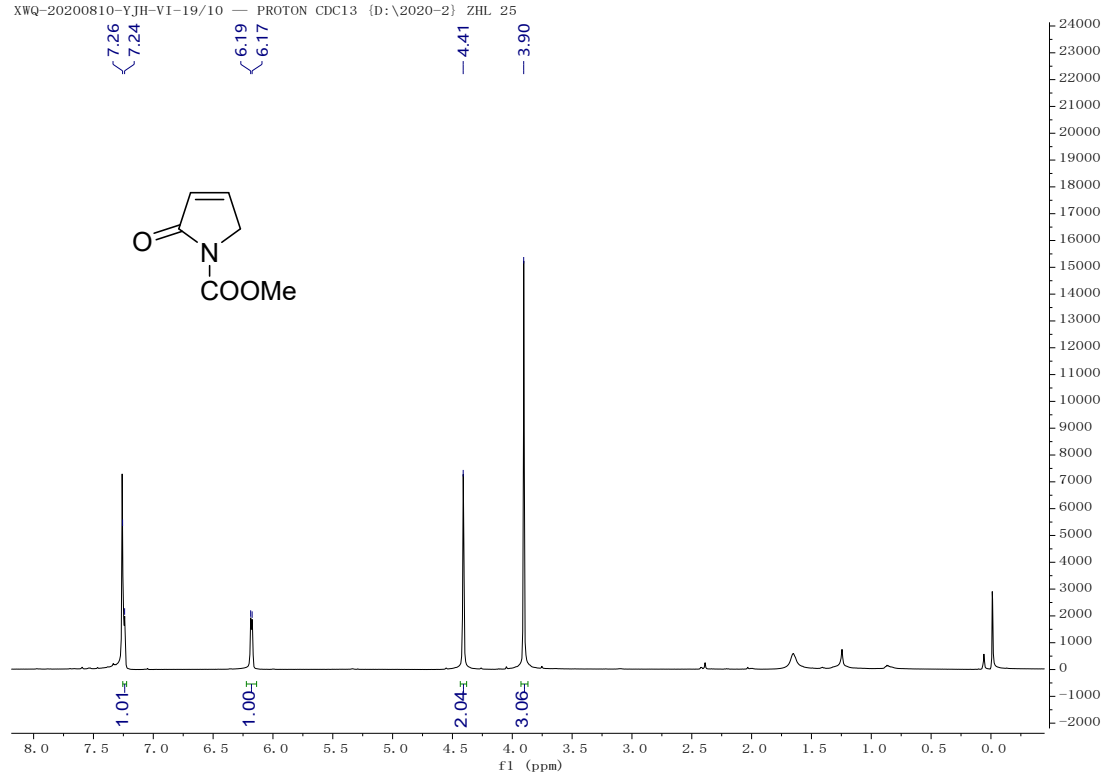

<sup>13</sup>C NMR spectrum of compound **S10m** (126 MHz, Chloroform-*d*)

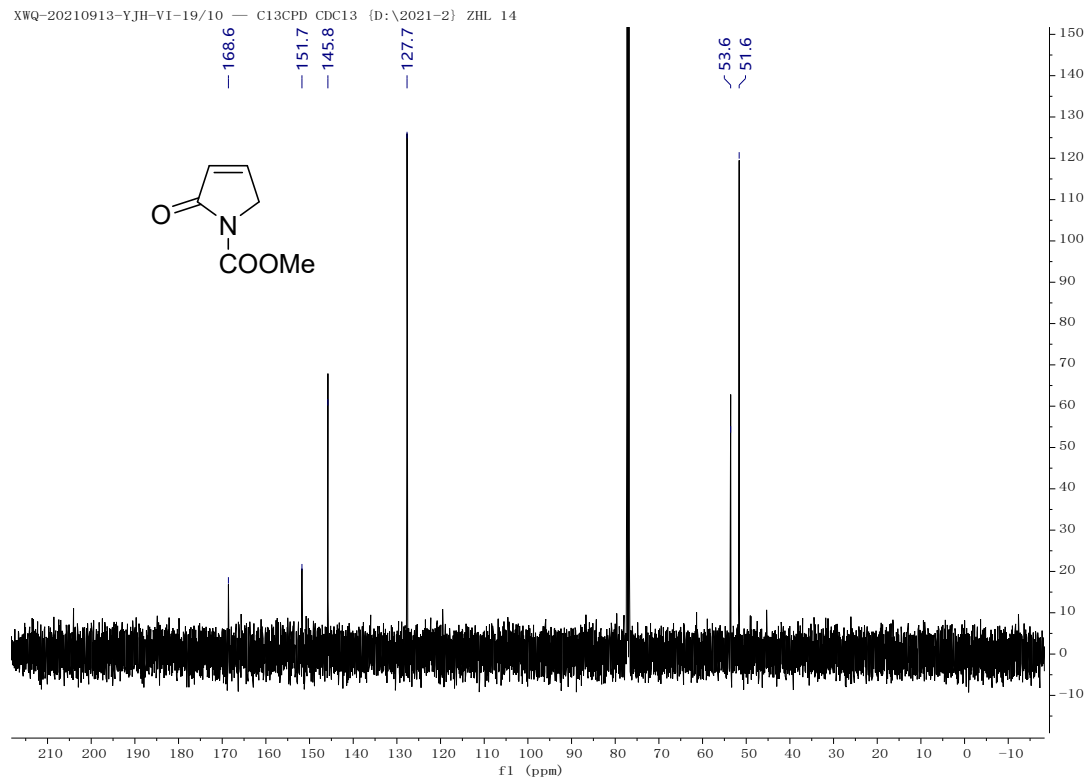

<sup>1</sup>H NMR spectrum of compound **S8n** (500 MHz, Chloroform-*d*)

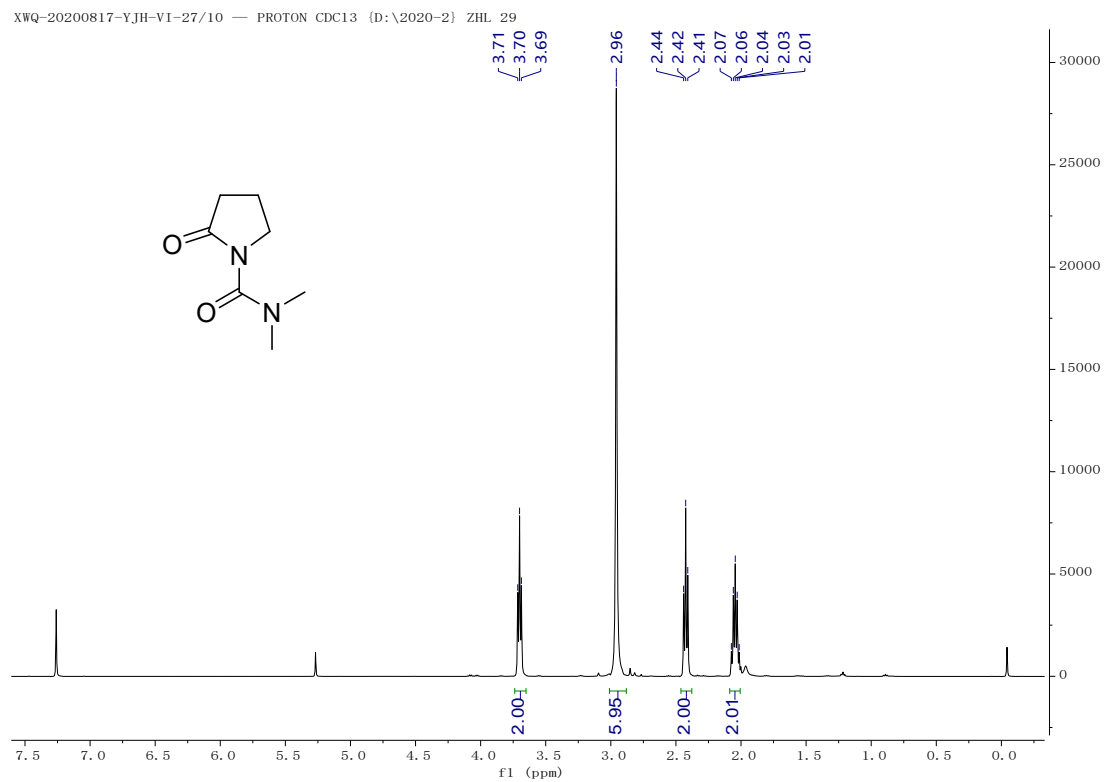

<sup>13</sup>C NMR spectrum of compound **S8n** (126 MHz, Chloroform-*d*)

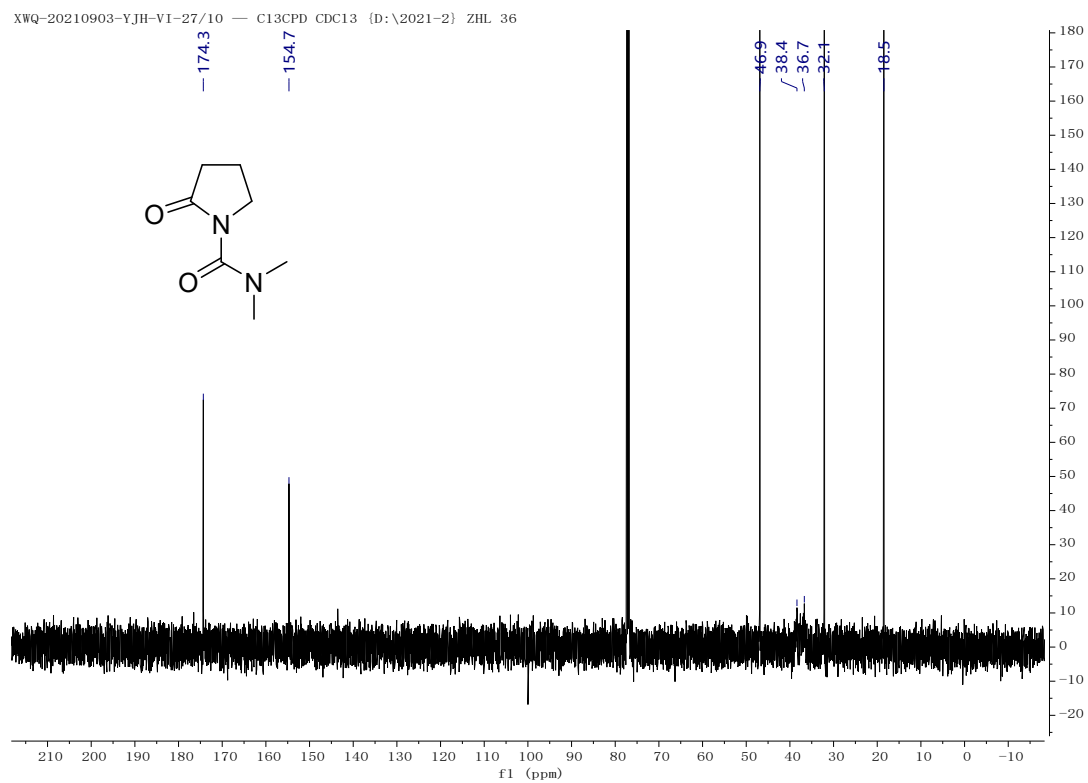

<sup>1</sup>H NMR spectrum of compound **S9n** (500 MHz, Chloroform-*d*)

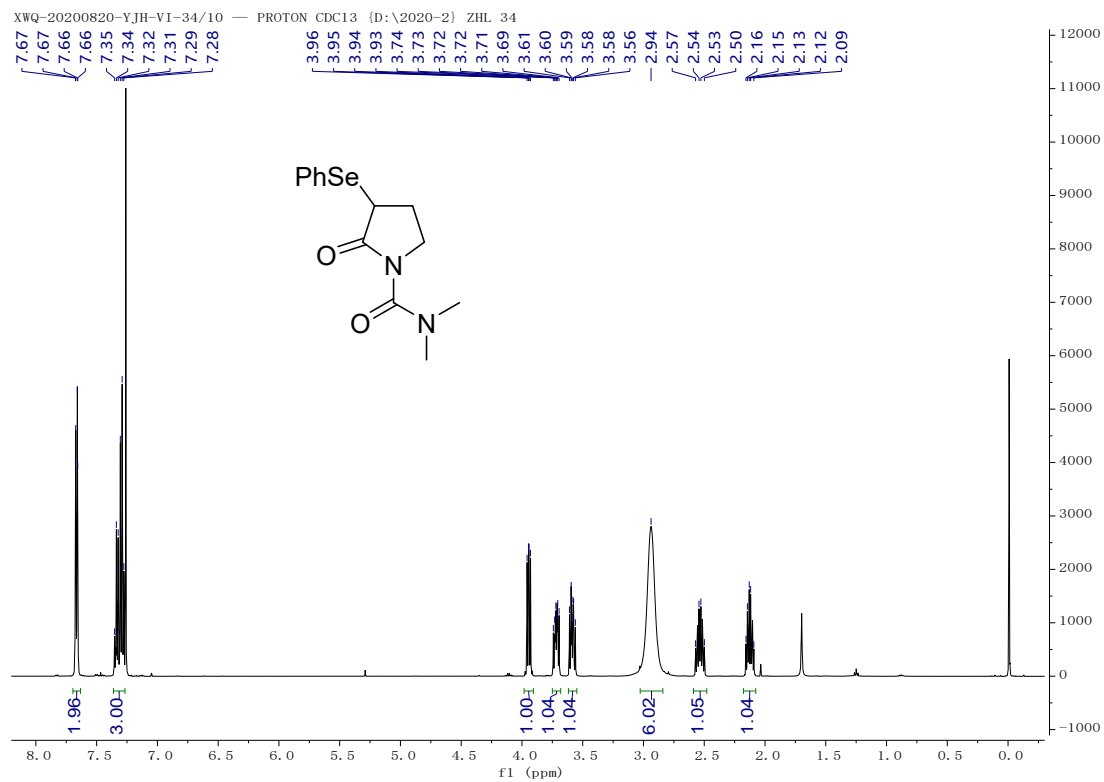

<sup>13</sup>C NMR spectrum of compound **S9n** (126 MHz, Chloroform-*d*)

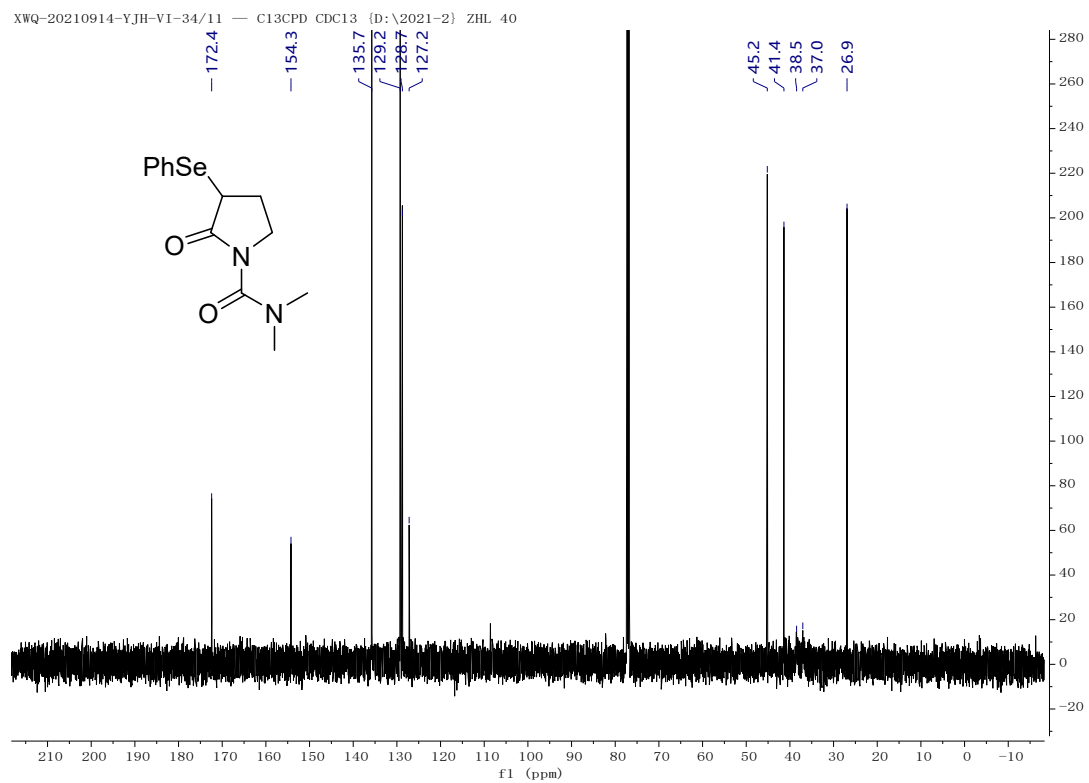

<sup>1</sup>H NMR spectrum of compound **S10n** (500 MHz, Chloroform-*d*)

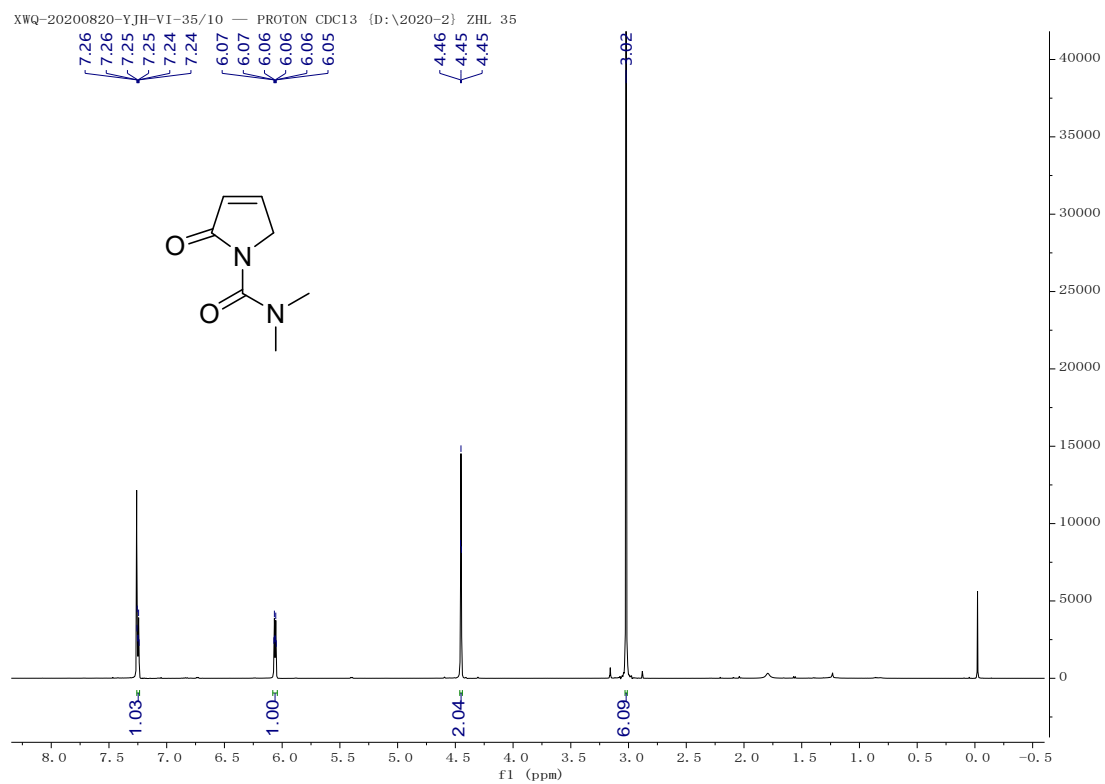

<sup>13</sup>C NMR spectrum of compound **S10n** (126 MHz, Chloroform-*d*)

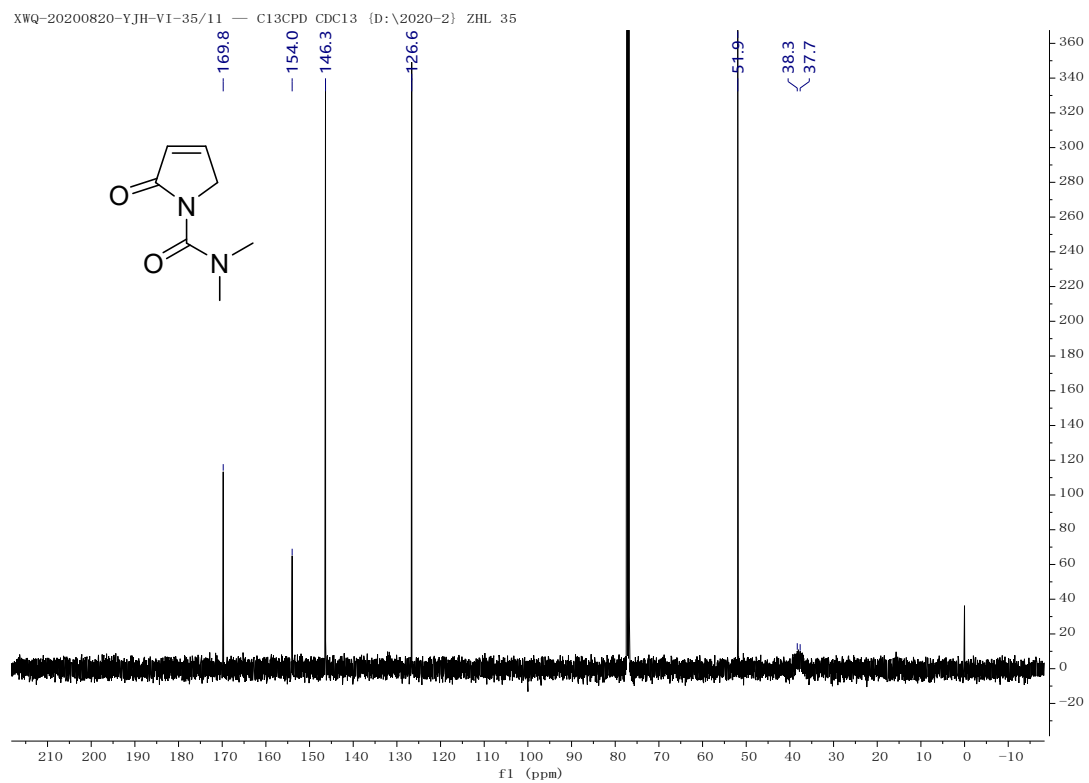



<sup>1</sup>H NMR spectrum of compound **S12a** (500 MHz, Chloroform-*d*)

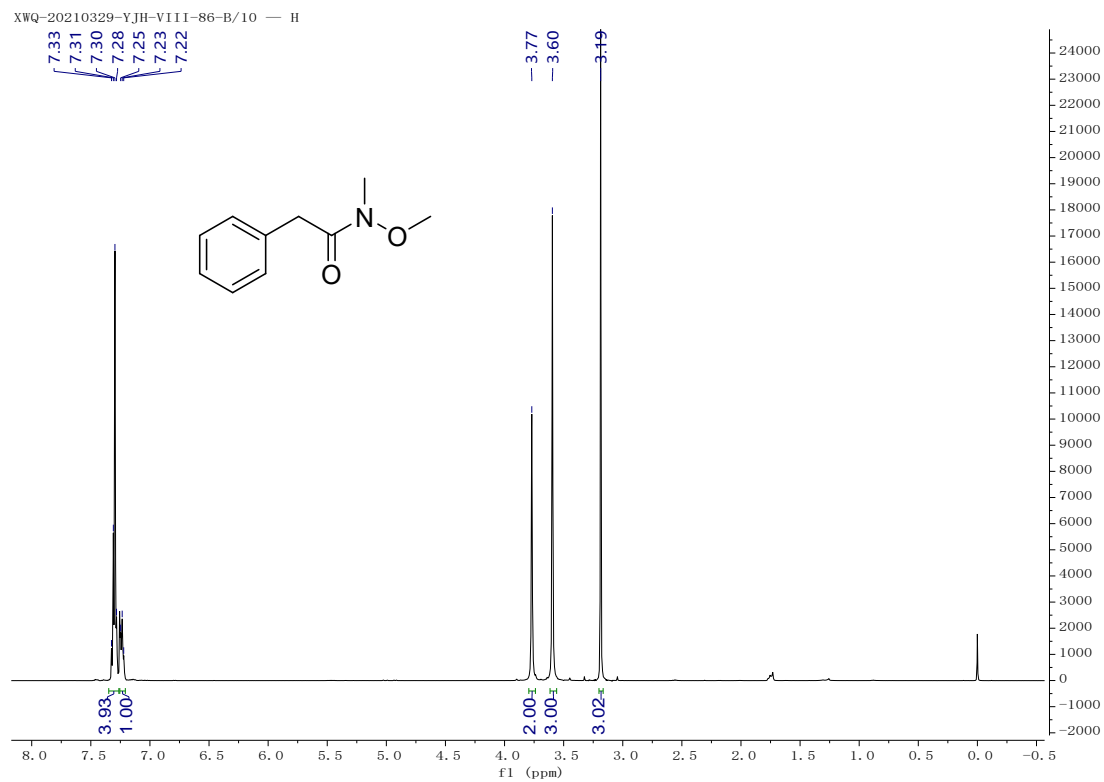

<sup>13</sup>C NMR spectrum of compound **S12a** (126 MHz, Chloroform-*d*)

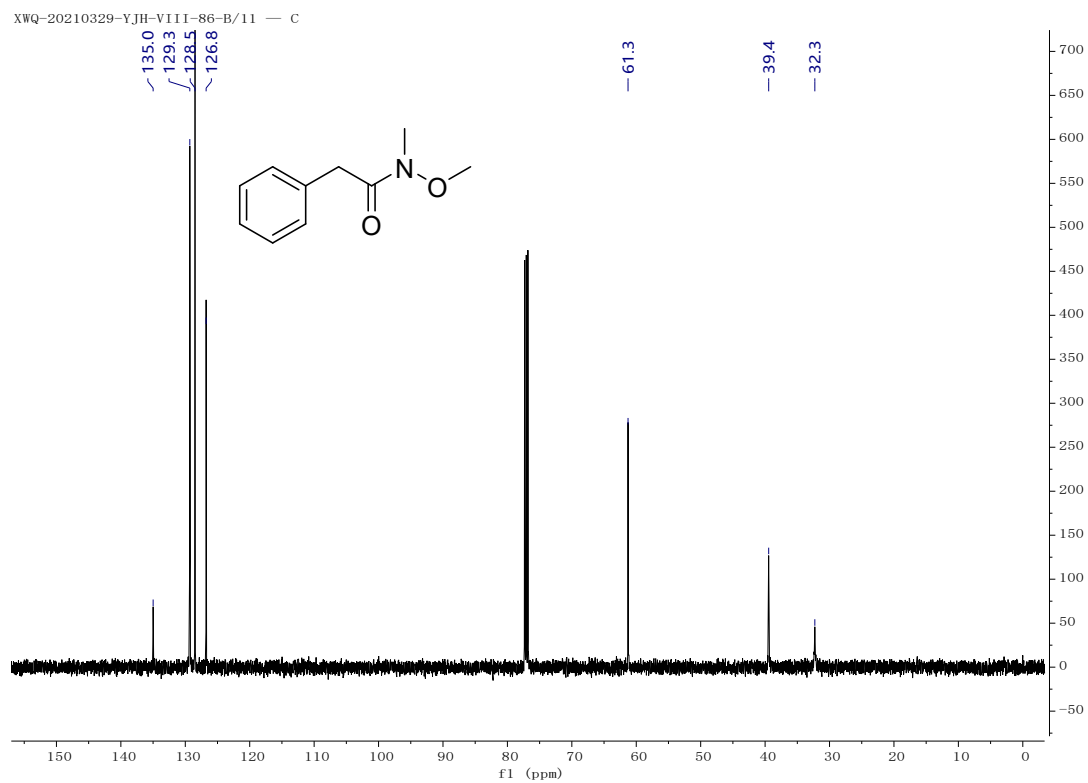

<sup>1</sup>H NMR spectrum of compound **16a** (500 MHz, Chloroform-*d*)

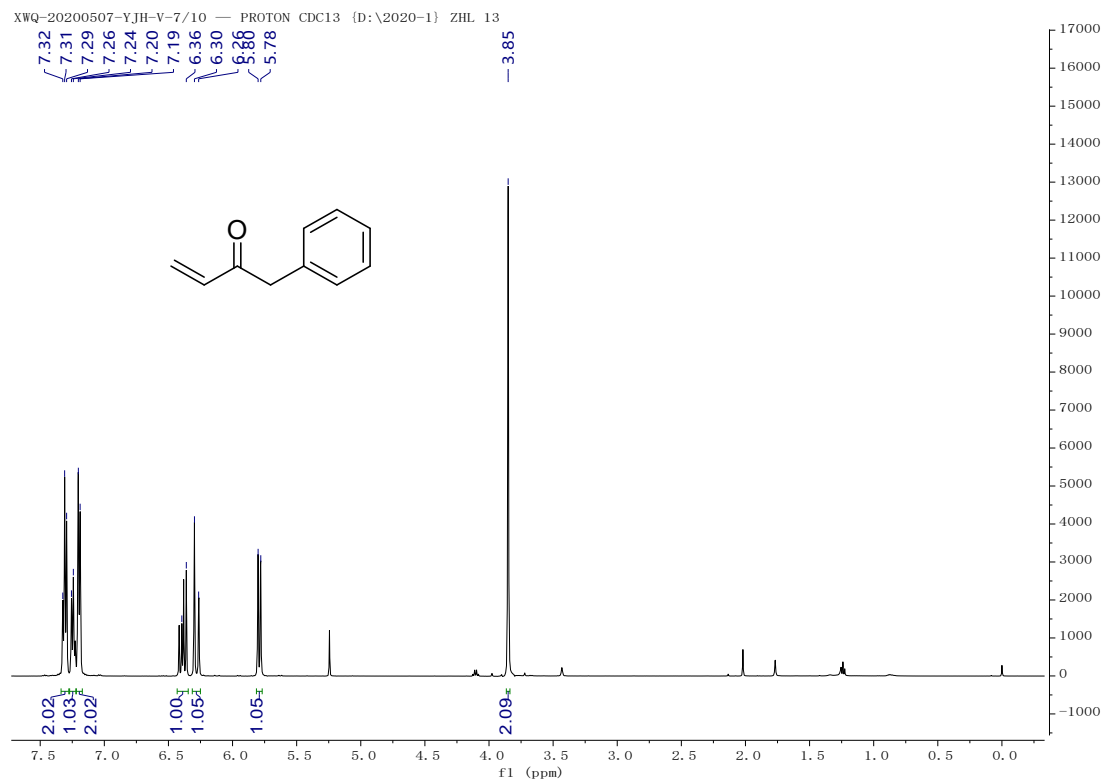

<sup>13</sup>C NMR spectrum of compound **16a** (126 MHz, Chloroform-*d*)

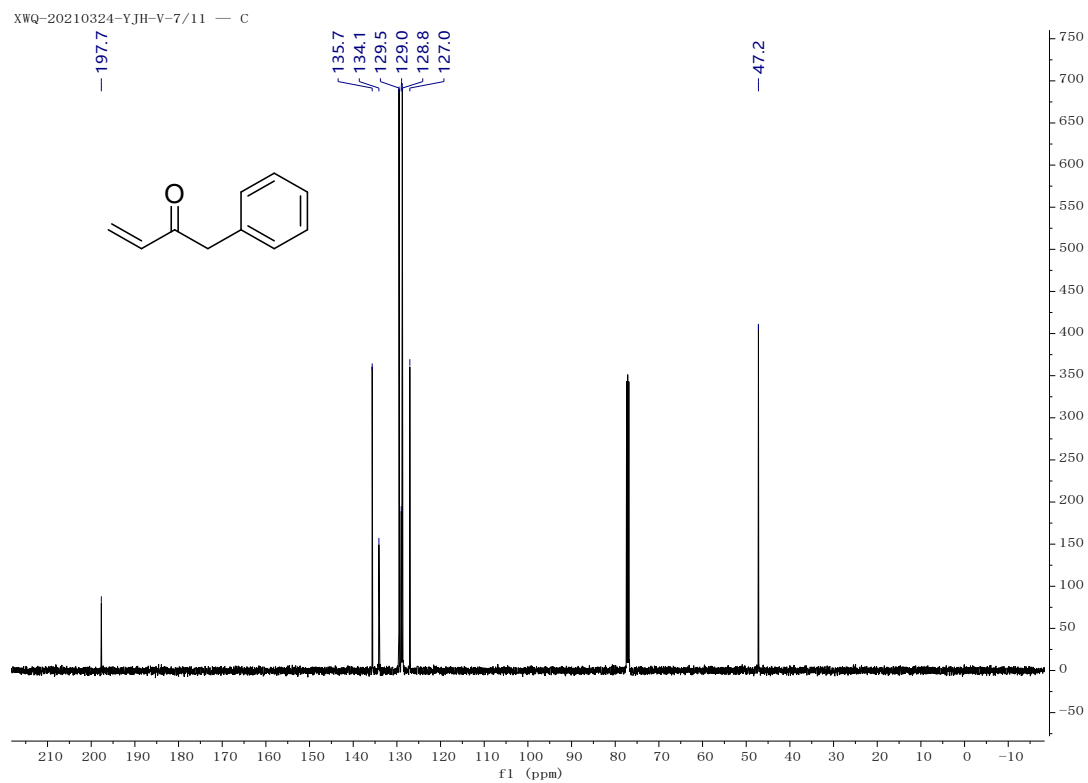

<sup>1</sup>H NMR spectrum of compound **S12d** (500 MHz, Chloroform-*d*)

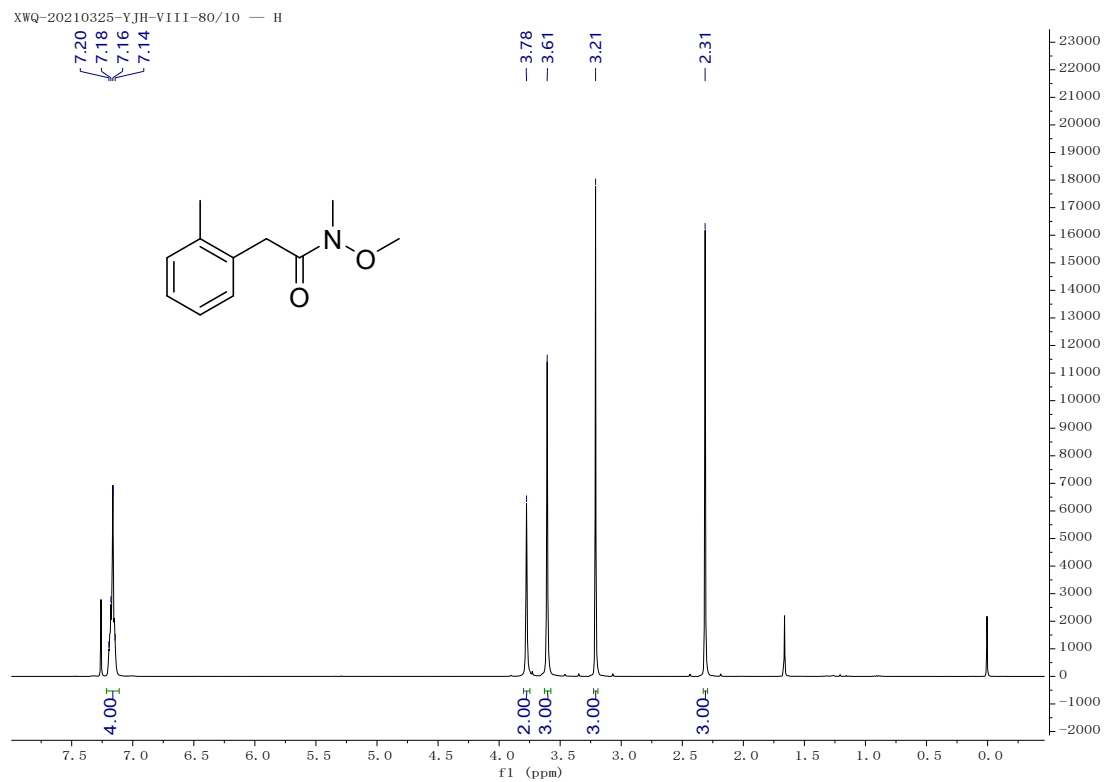

<sup>13</sup>C NMR spectrum of compound **S12d** (126 MHz, Chloroform-*d*)

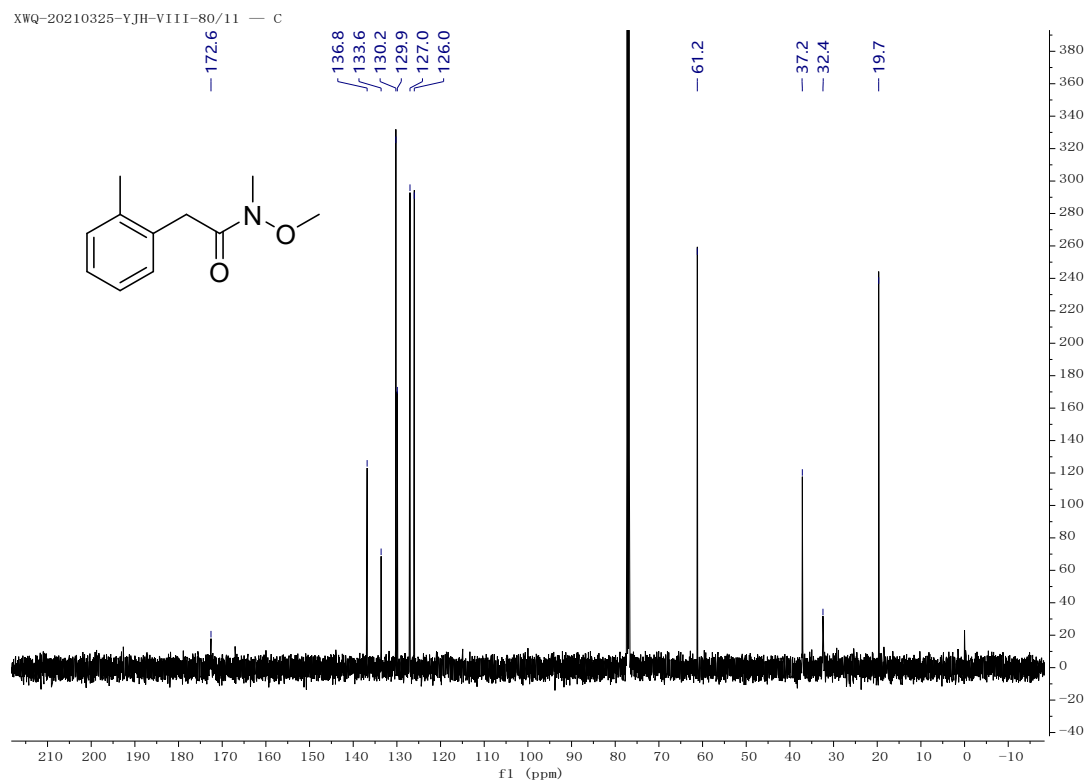

<sup>1</sup>H NMR spectrum of compound **16d** (500 MHz, Chloroform-*d*)

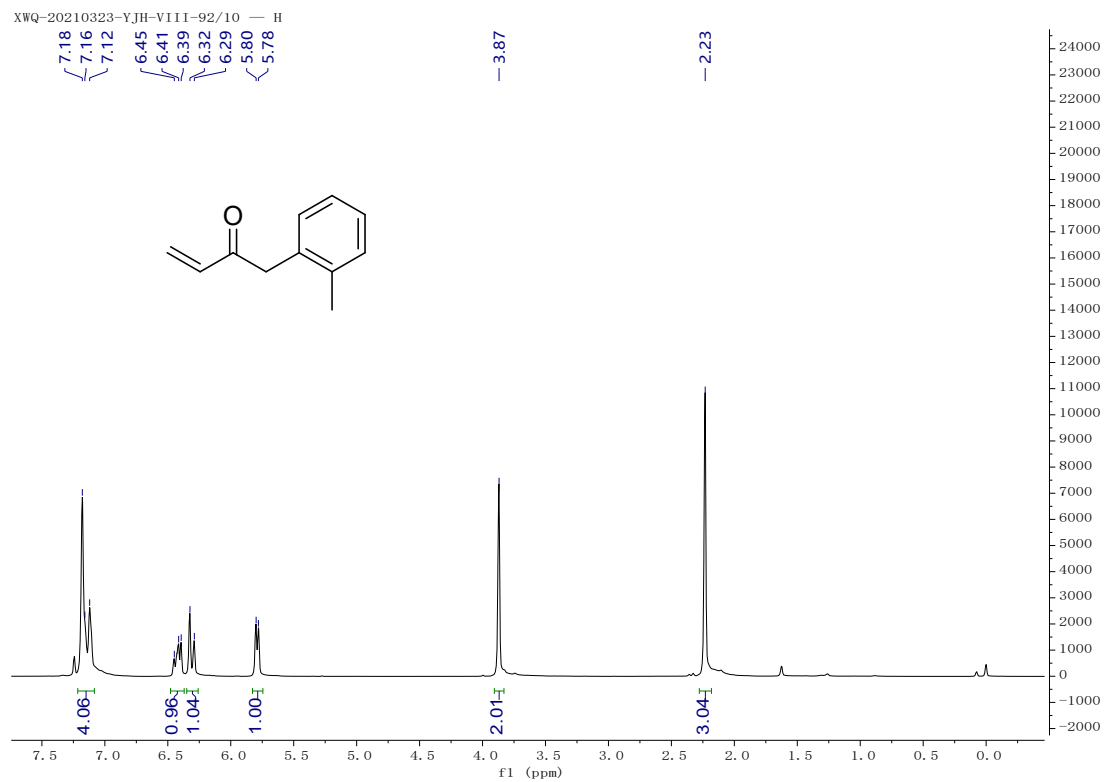

<sup>13</sup>C NMR spectrum of compound **16d** (126 MHz, Chloroform-*d*)

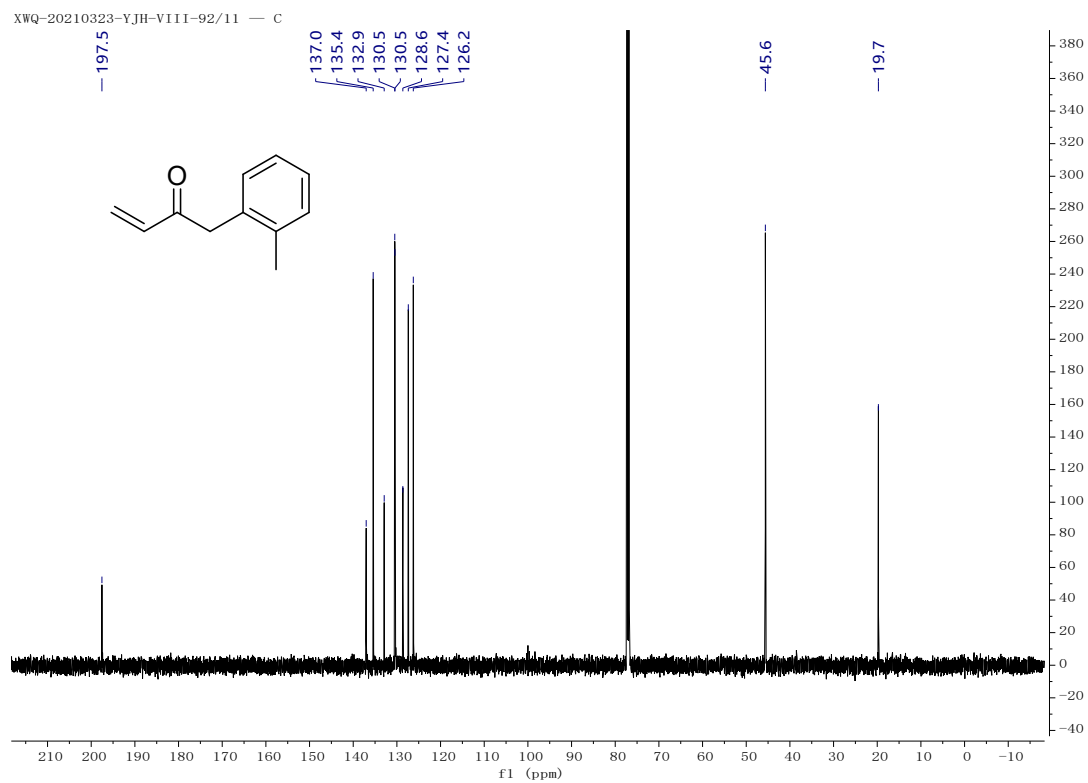

<sup>1</sup>H NMR spectrum of compound S12e (500 MHz, Chloroform-*d*)

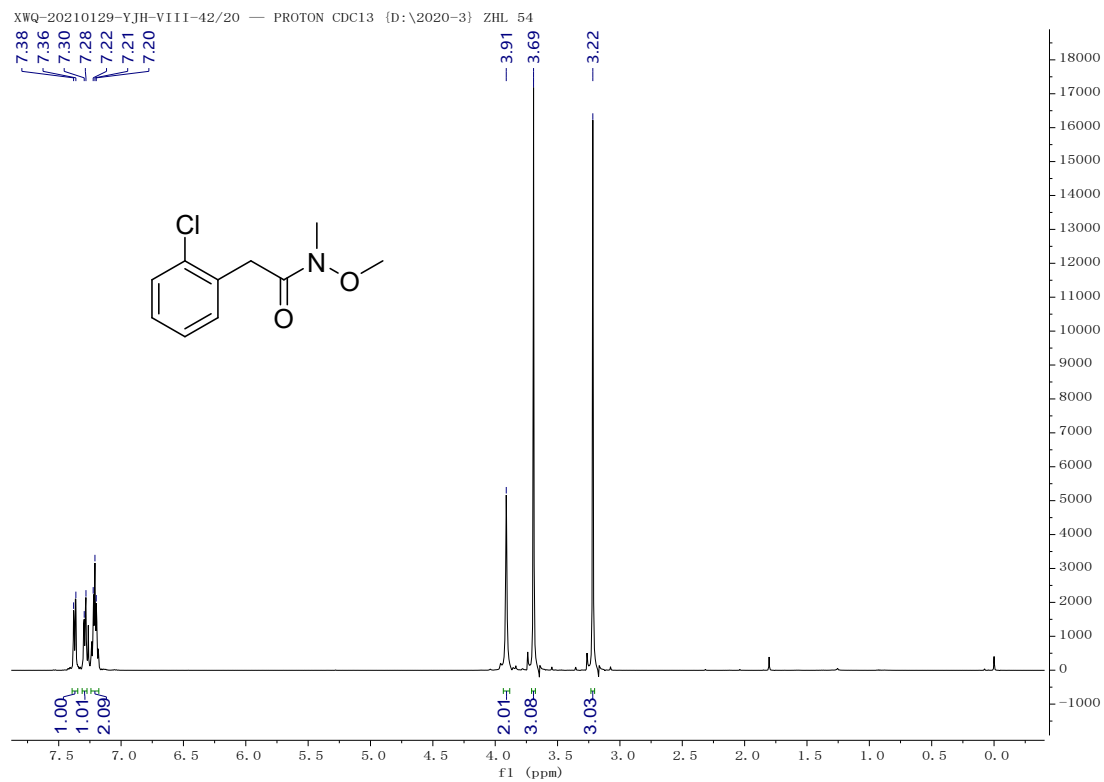

<sup>13</sup>C NMR spectrum of compound S12e (126 MHz, Chloroform-*d*)

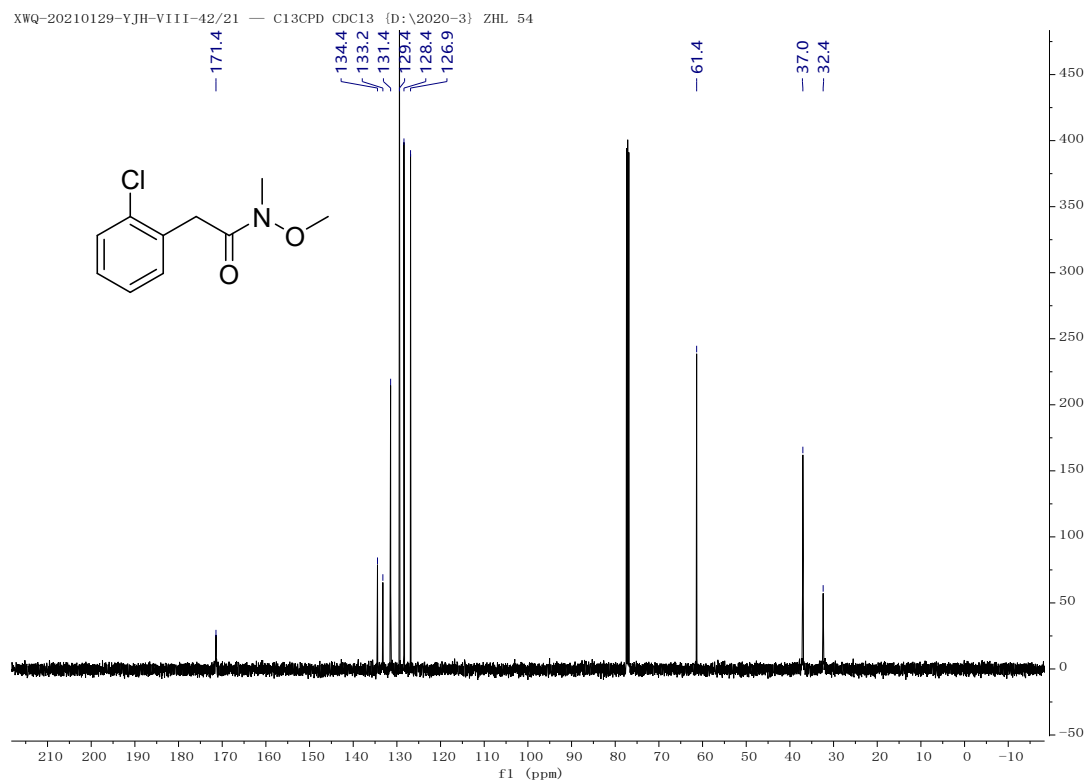

<sup>1</sup>H NMR spectrum of compound **16e** (500 MHz, Chloroform-*d*)

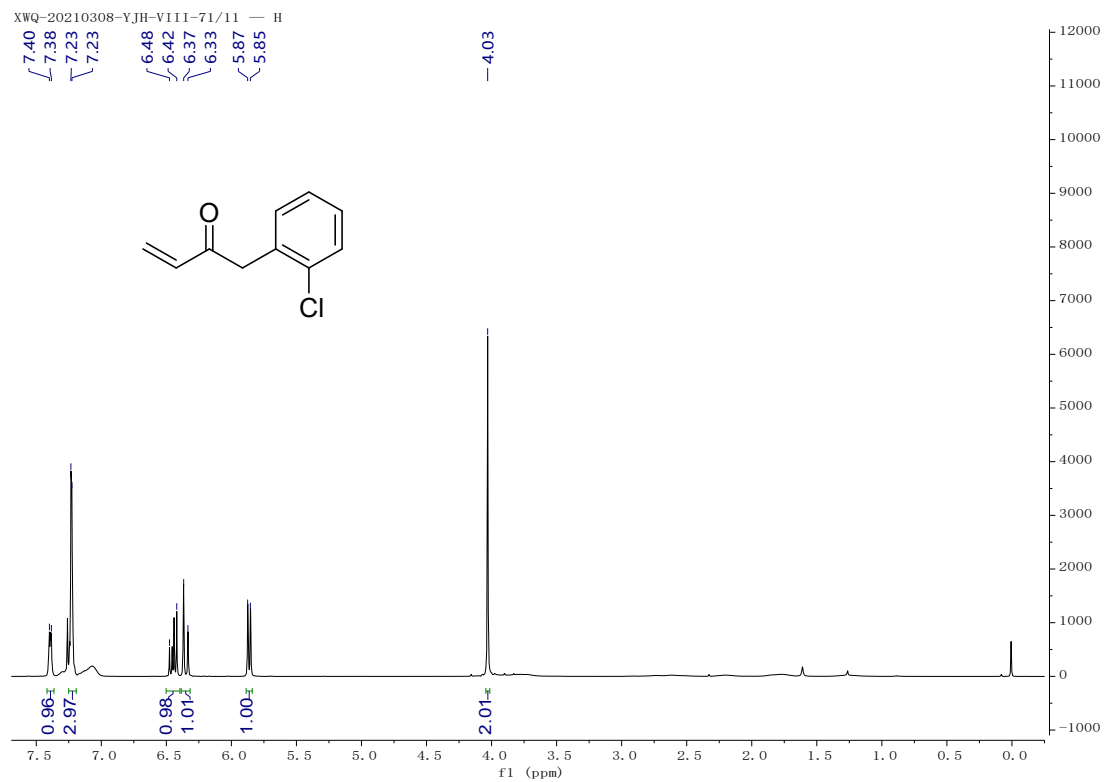

<sup>13</sup>C NMR spectrum of compound **16e** (126 MHz, Chloroform-*d*)

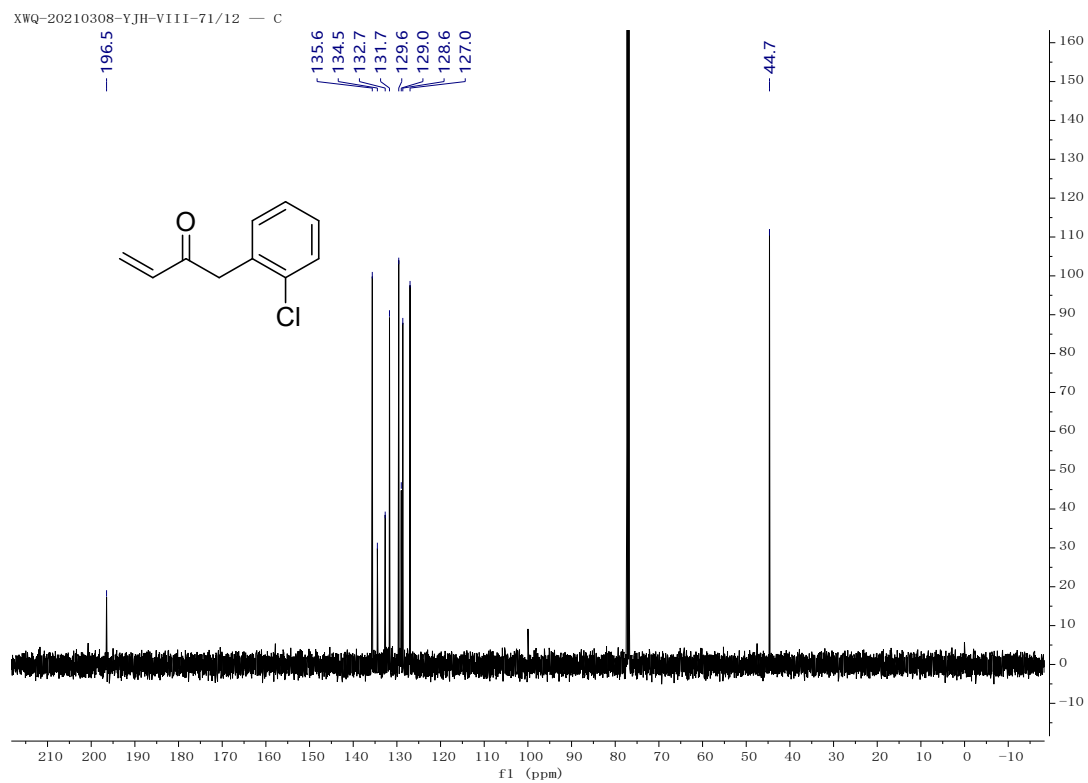

<sup>1</sup>H NMR spectrum of compound **S12f** (500 MHz, Chloroform-*d*)

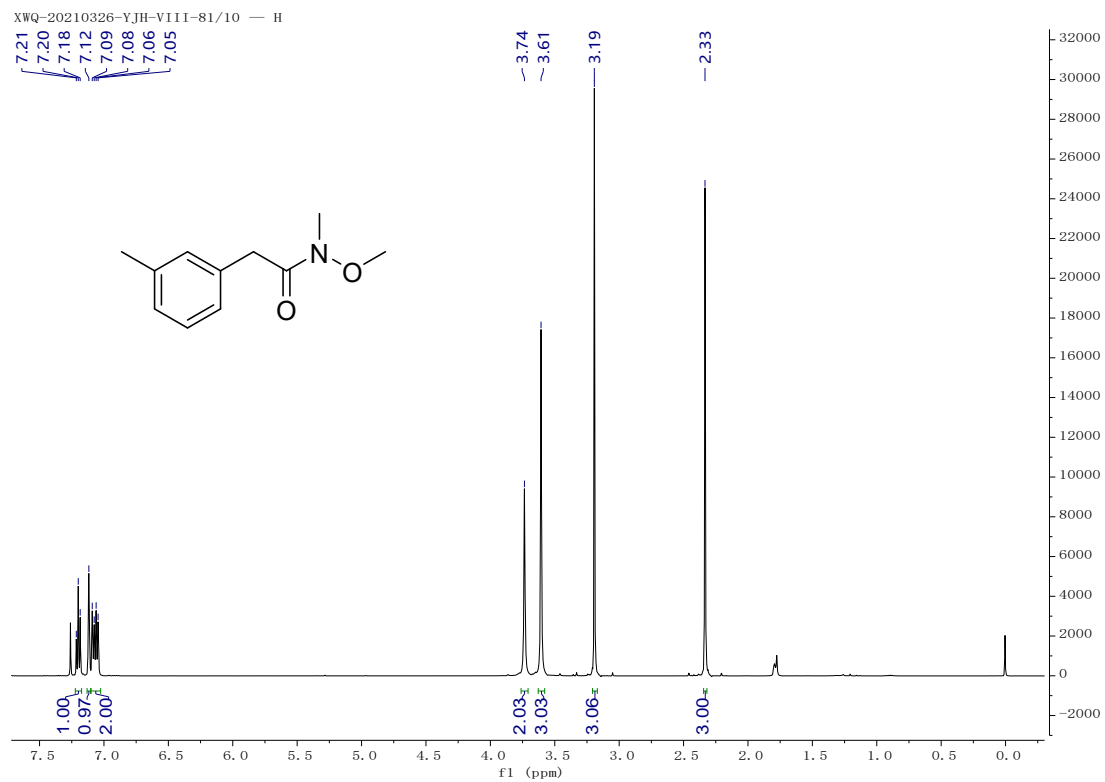

<sup>13</sup>C NMR spectrum of compound **S12f** (126 MHz, Chloroform-*d*)

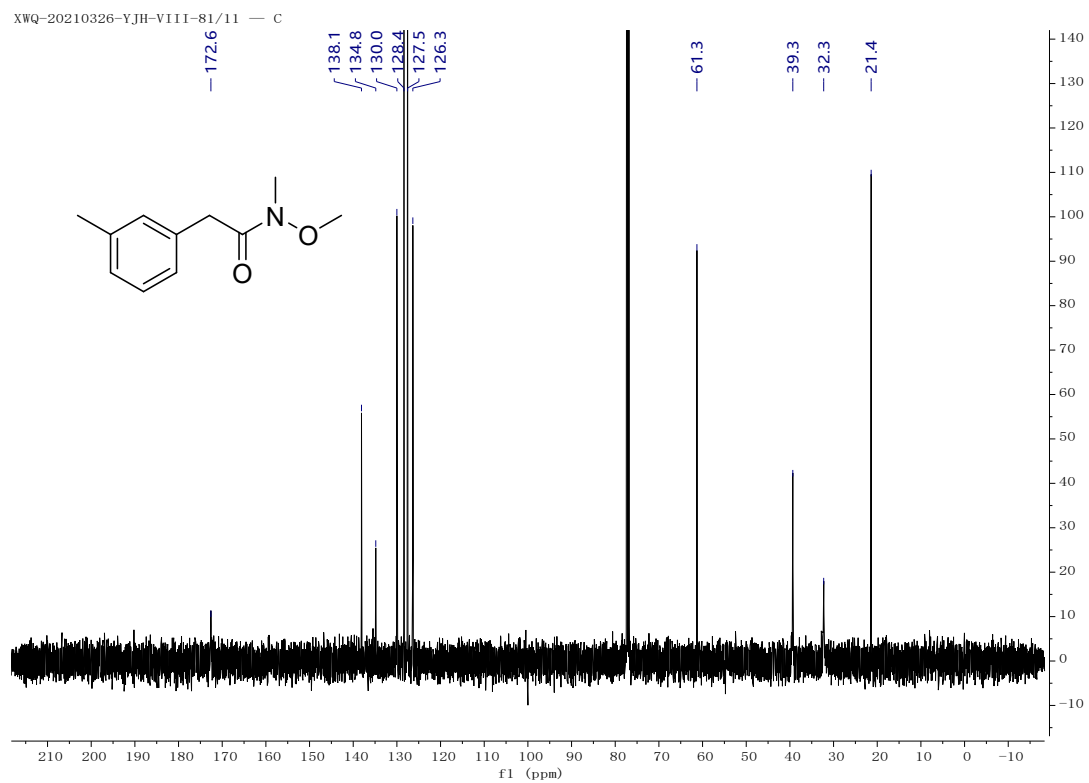

<sup>1</sup>H NMR spectrum of compound **16f** (500 MHz, Chloroform-*d*)

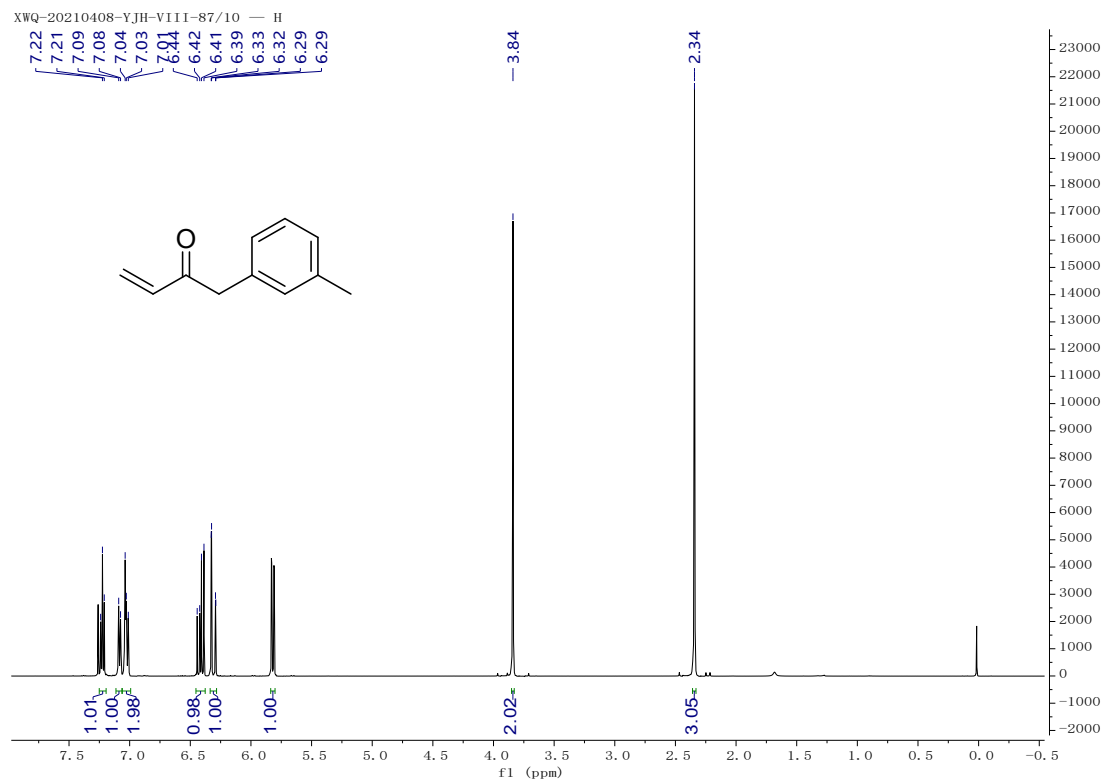

<sup>13</sup>C NMR spectrum of compound **16f** (126 MHz, Chloroform-*d*)

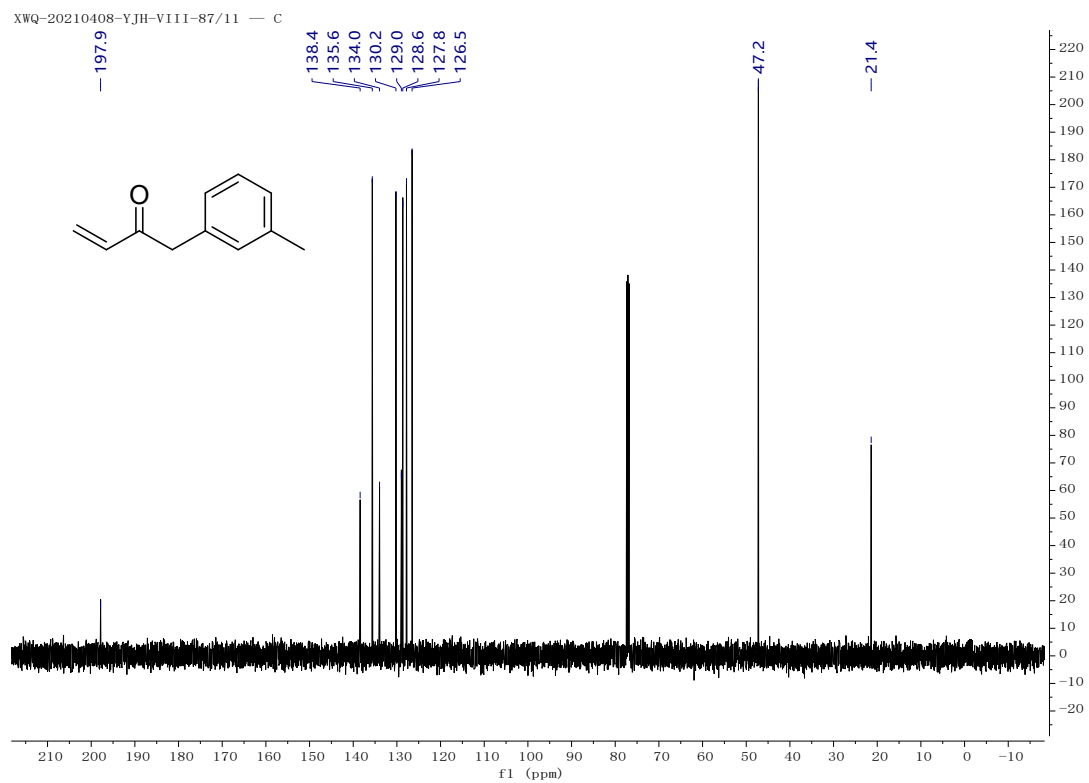



<sup>1</sup>H NMR spectrum of compound **S12g** (500 MHz, Chloroform-*d*)

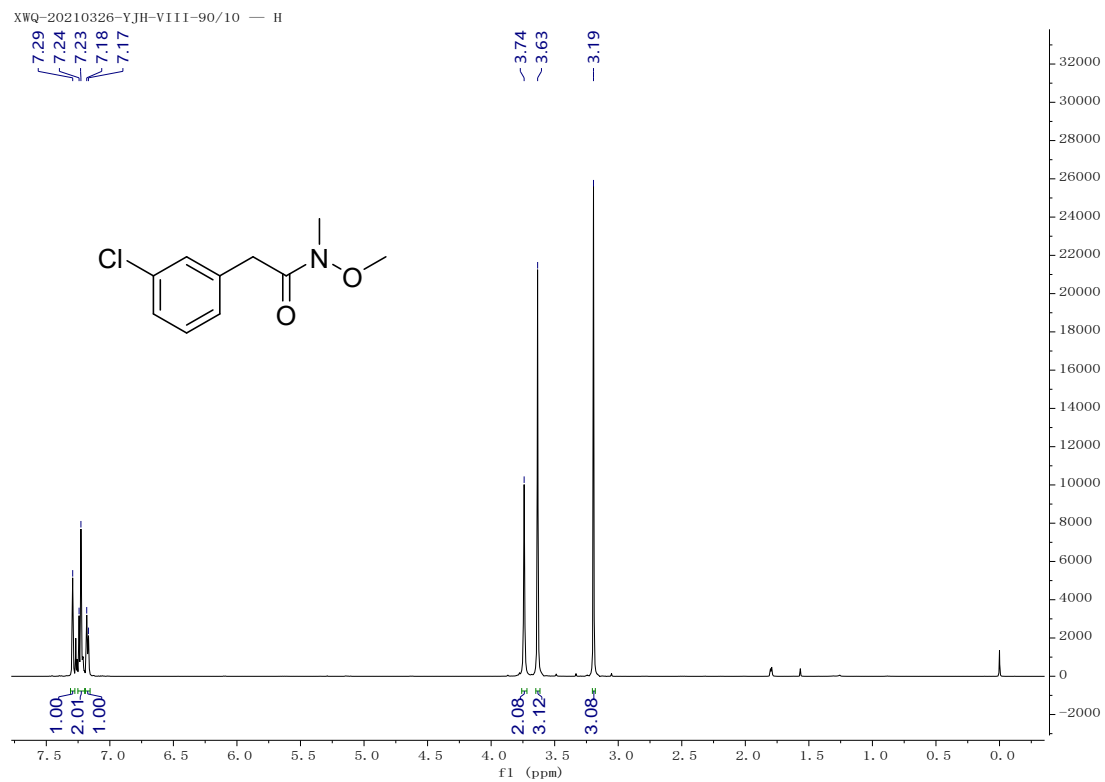

<sup>13</sup>C NMR spectrum of compound **S12g** (126 MHz, Chloroform-*d*)

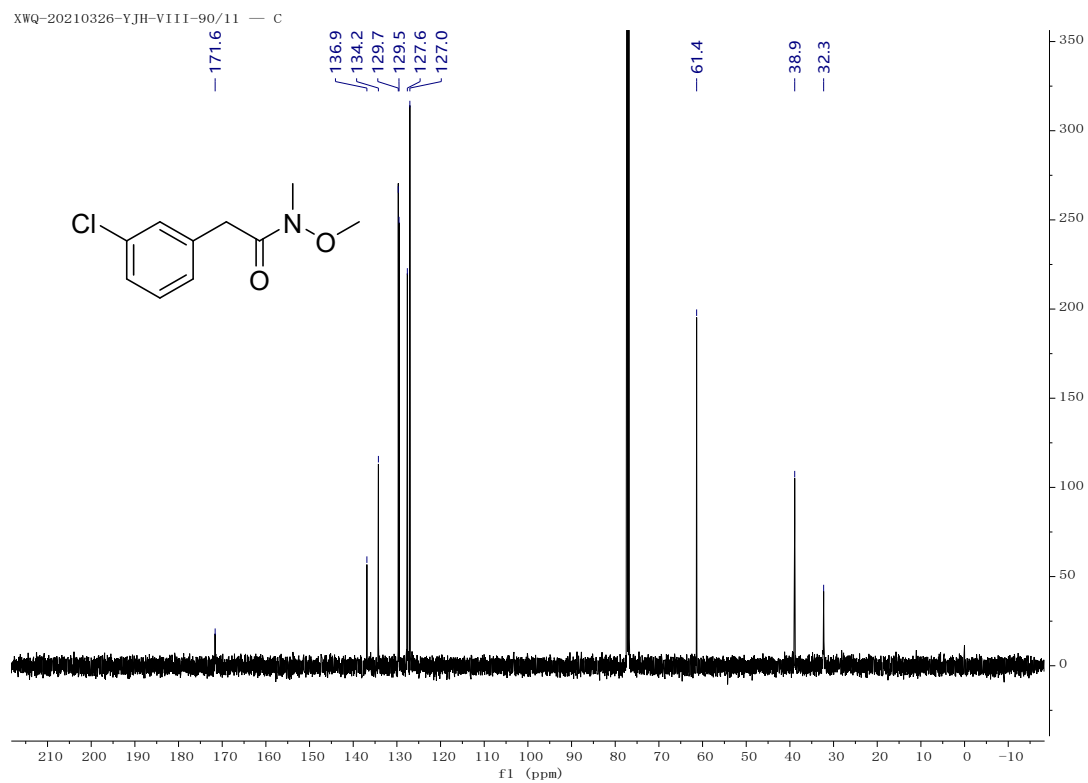

<sup>1</sup>H NMR spectrum of compound **16g** (500 MHz, Chloroform-*d*)

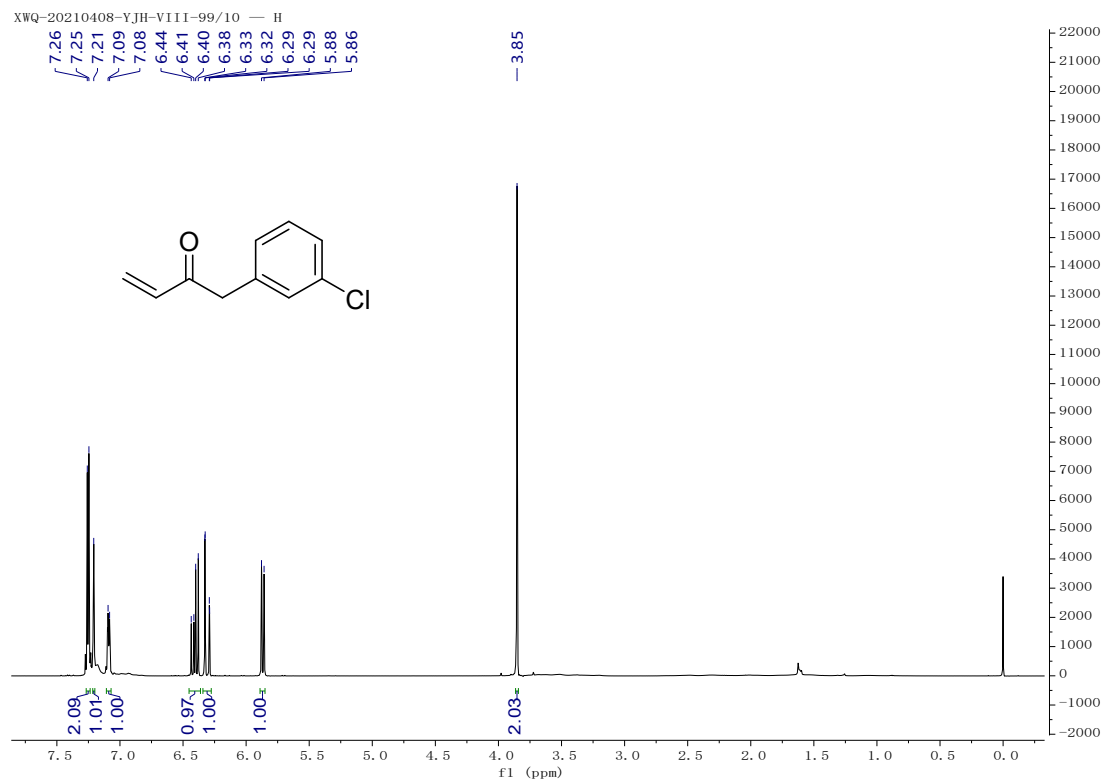

<sup>13</sup>C NMR spectrum of compound **16g** (126 MHz, Chloroform-*d*)

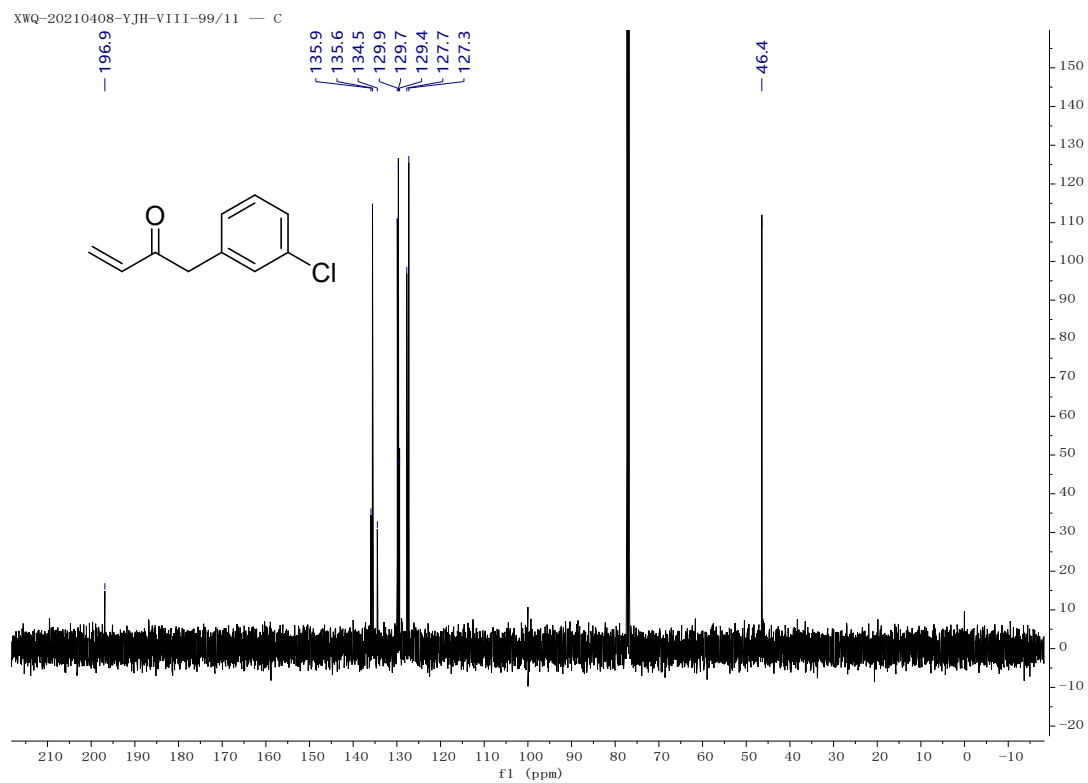

<sup>1</sup>H NMR spectrum of compound **S12h** (500 MHz, Chloroform-*d*)

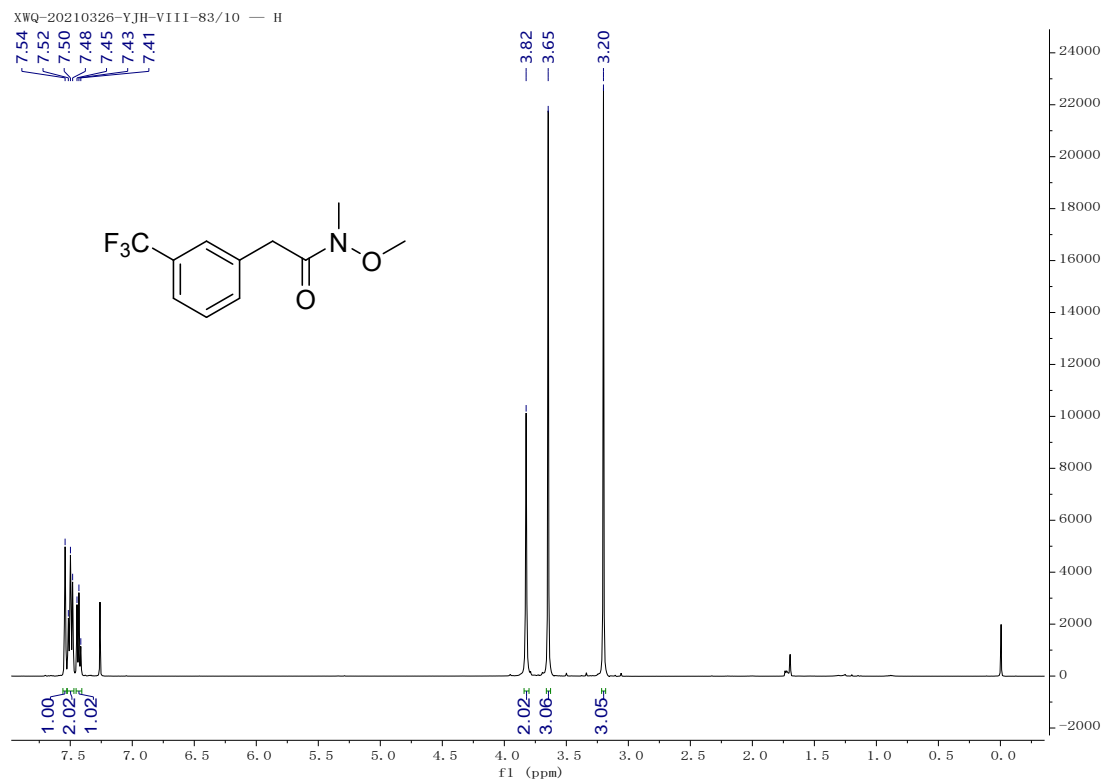

<sup>13</sup>C NMR spectrum of compound **S12h** (126 MHz, Chloroform-*d*)

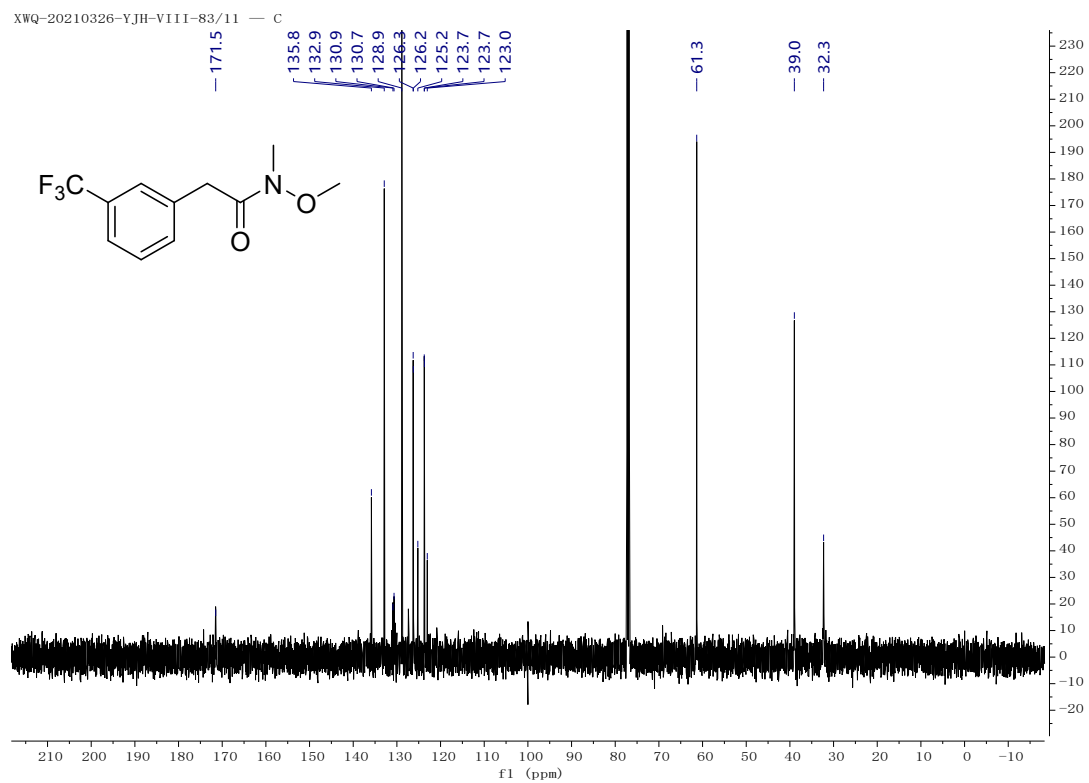

<sup>1</sup>H NMR spectrum of compound **16h** (500 MHz, Chloroform-*d*)

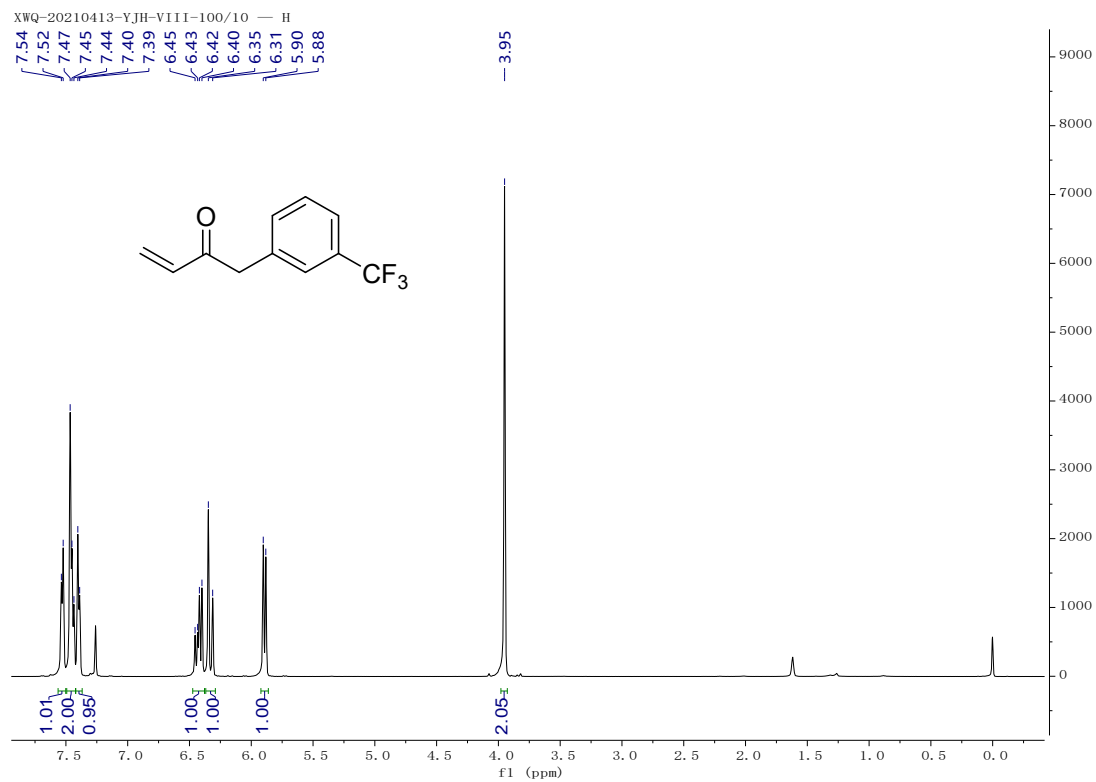

<sup>13</sup>C NMR spectrum of compound **16h** (126 MHz, Chloroform-*d*)

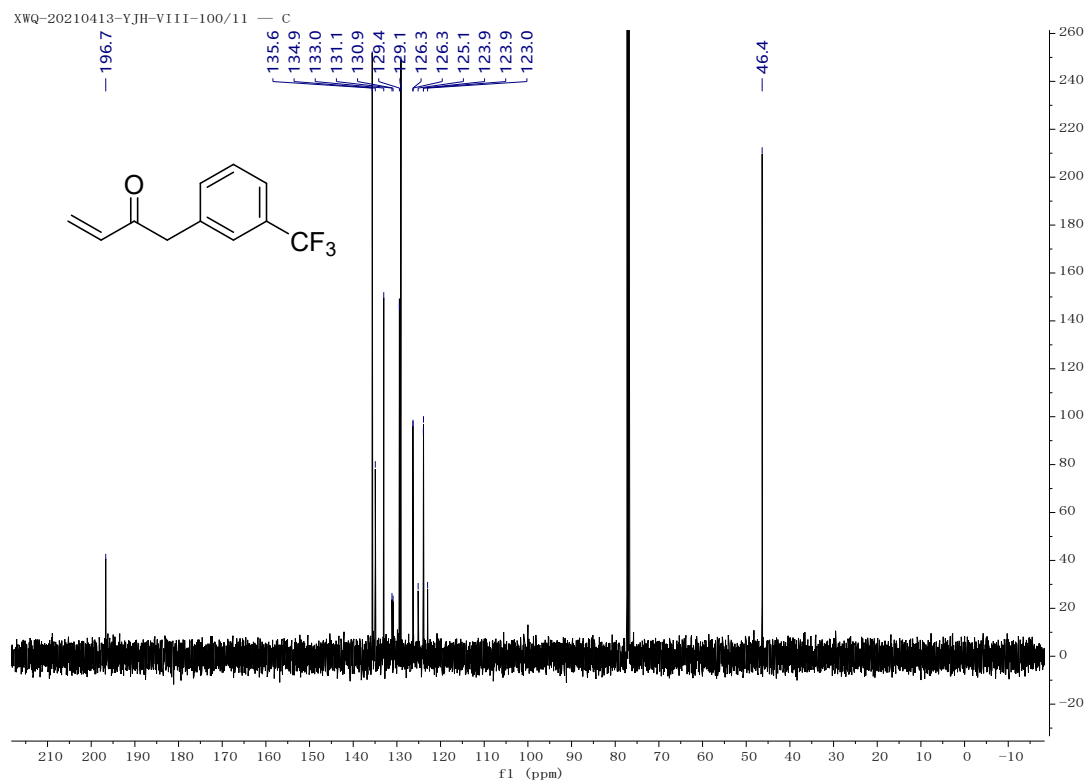

<sup>1</sup>H NMR spectrum of compound **S12i** (500 MHz, Chloroform-*d*)

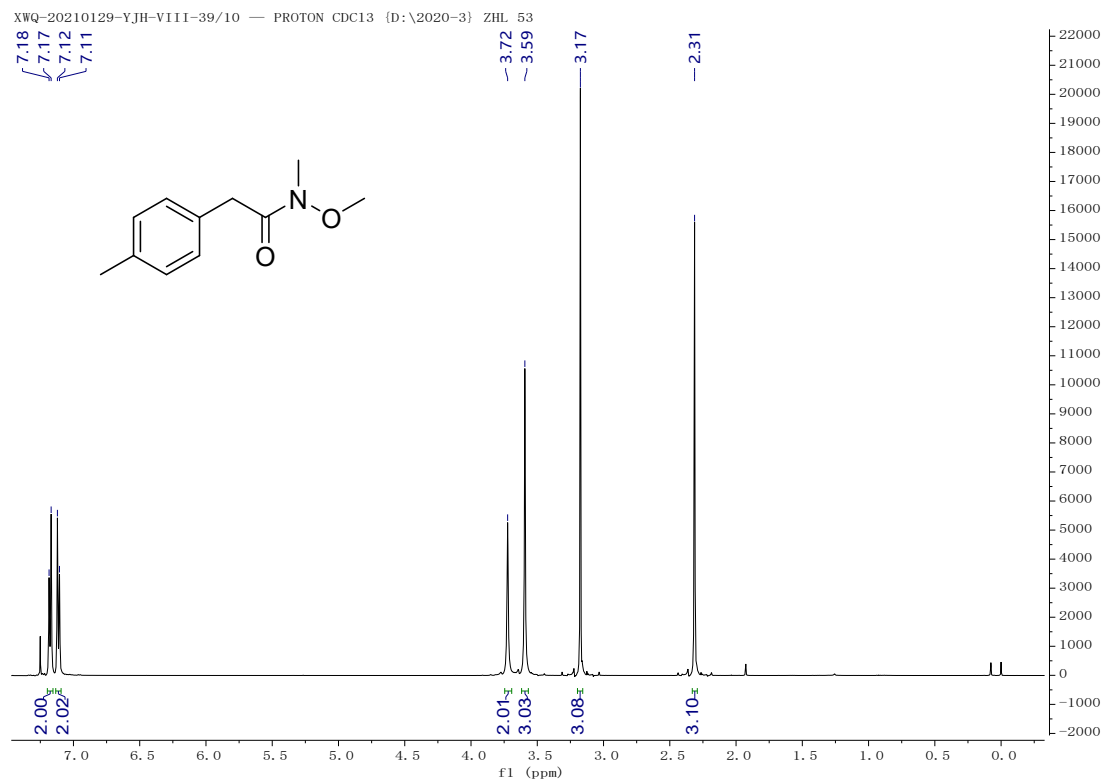

<sup>13</sup>C NMR spectrum of compound **S12i** (126 MHz, Chloroform-*d*)

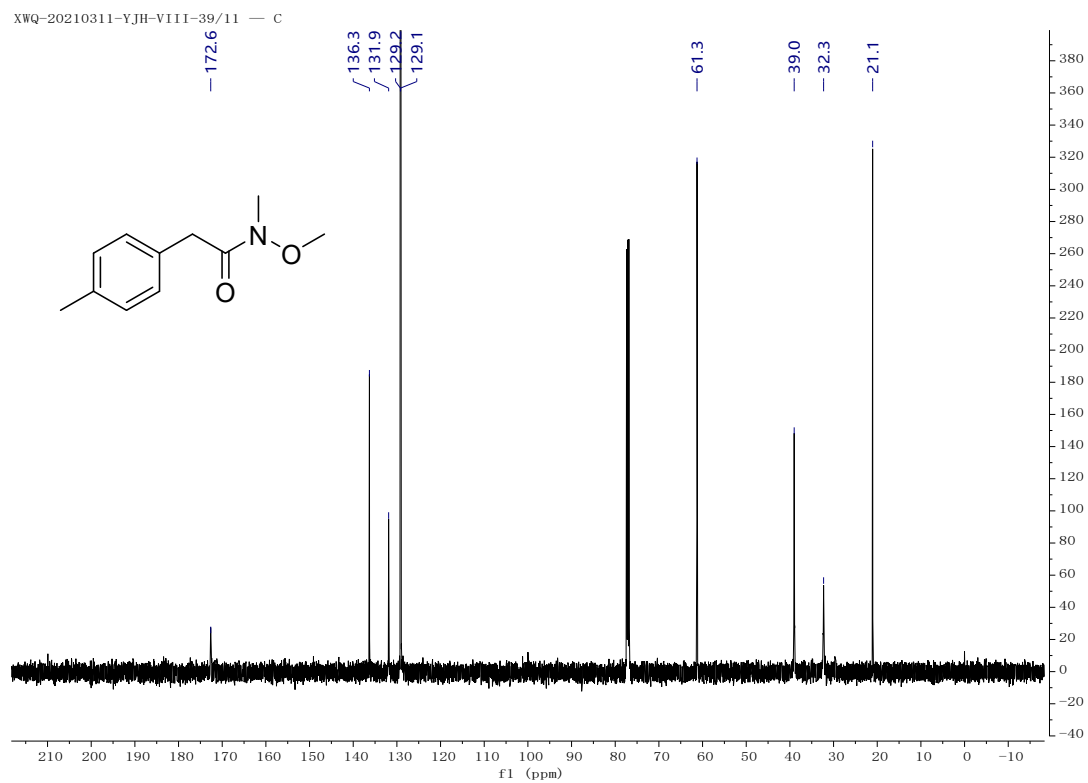

<sup>1</sup>H NMR spectrum of compound **16i** (500 MHz, Chloroform-*d*)

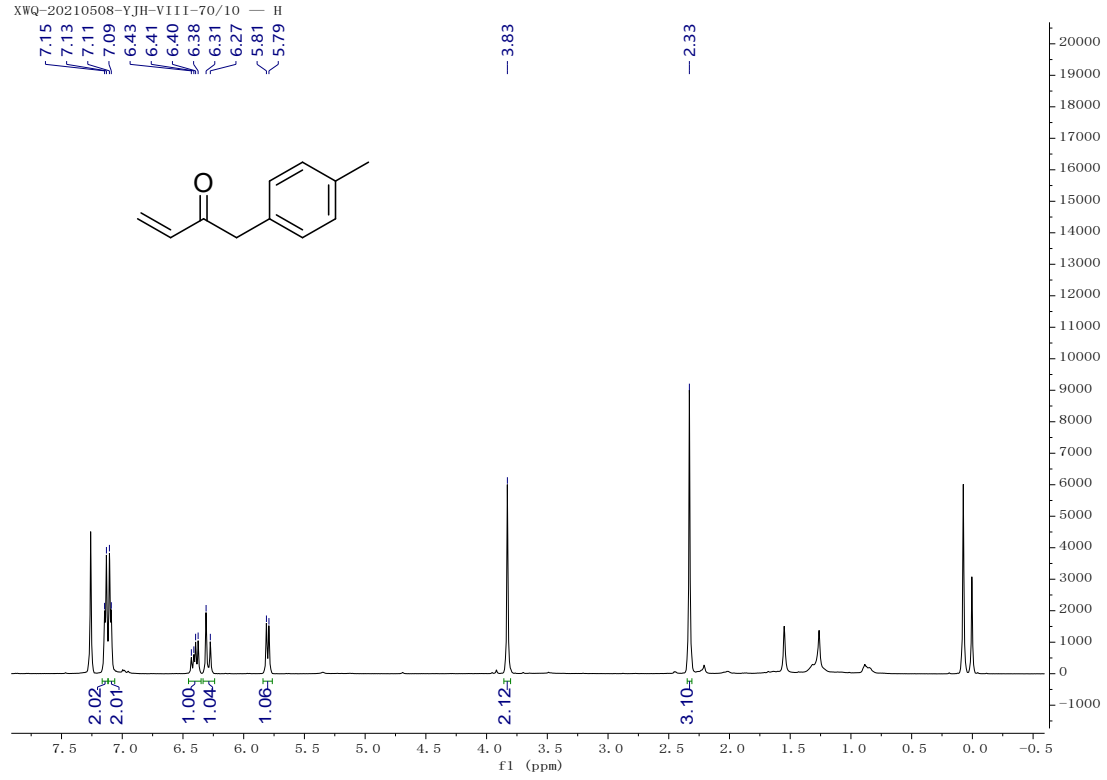

<sup>13</sup>C NMR spectrum of compound **16i** (126 MHz, Chloroform-*d*)

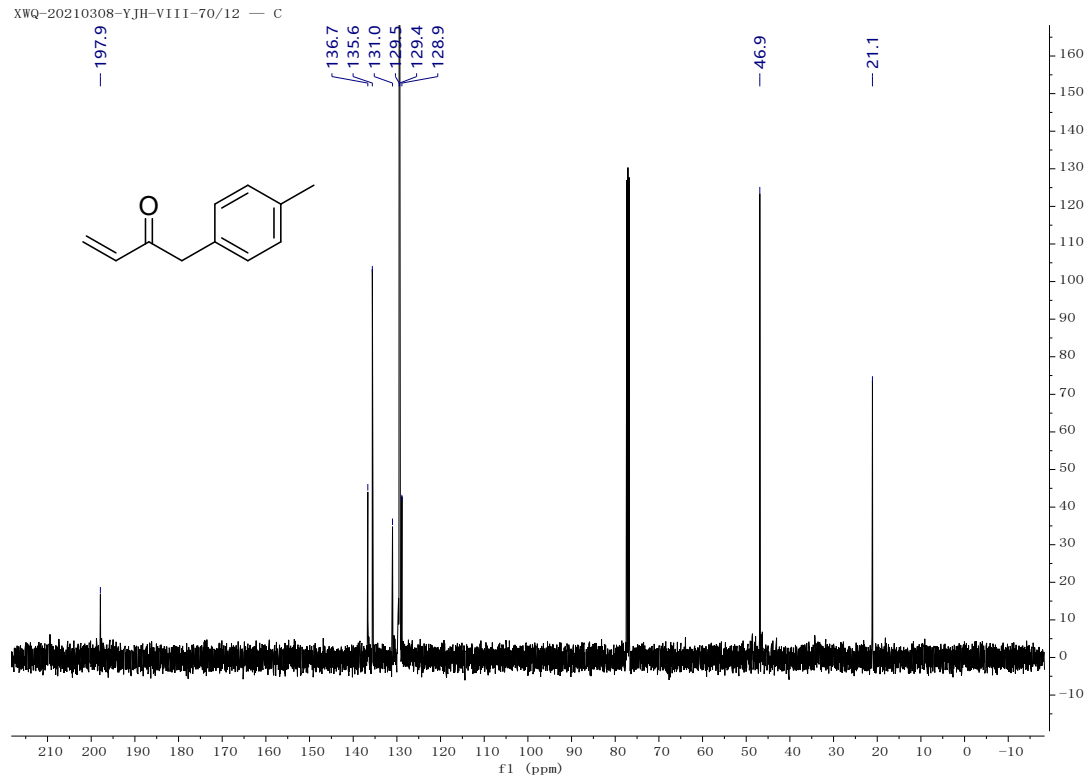

<sup>1</sup>H NMR spectrum of compound **S12j** (500 MHz, Chloroform-*d*)

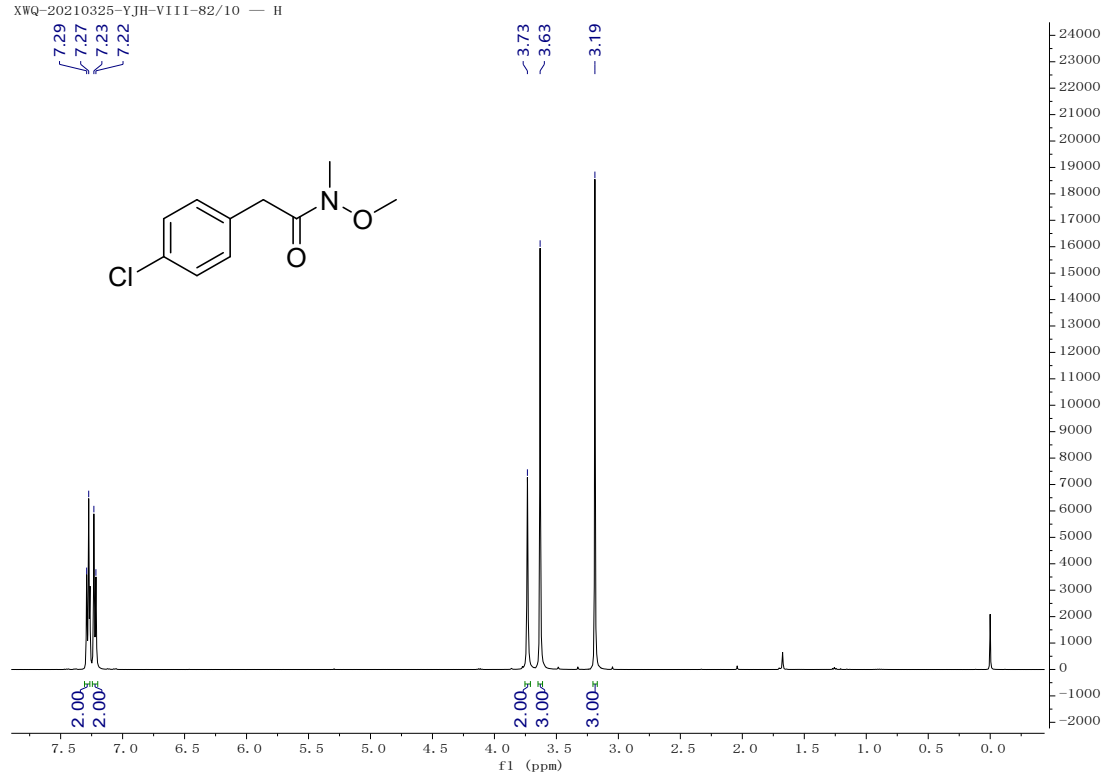

<sup>13</sup>C NMR spectrum of compound **S12j** (126 MHz, Chloroform-*d*)

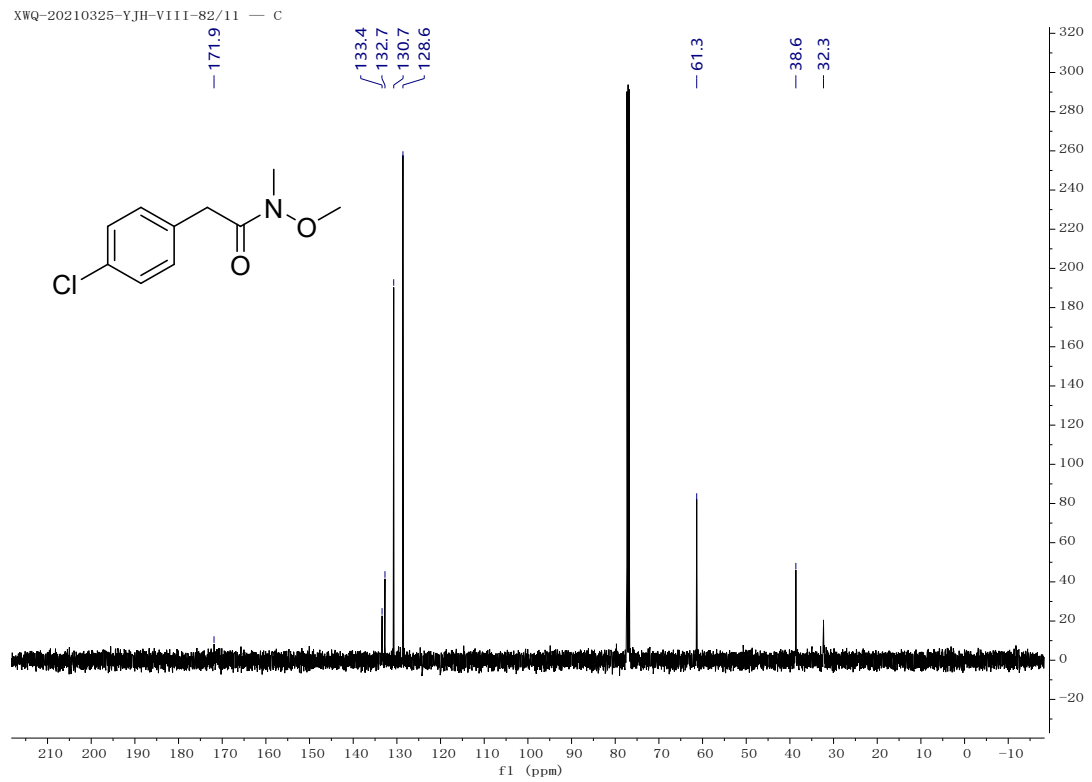

<sup>1</sup>H NMR spectrum of compound **16j** (500 MHz, Chloroform-*d*)

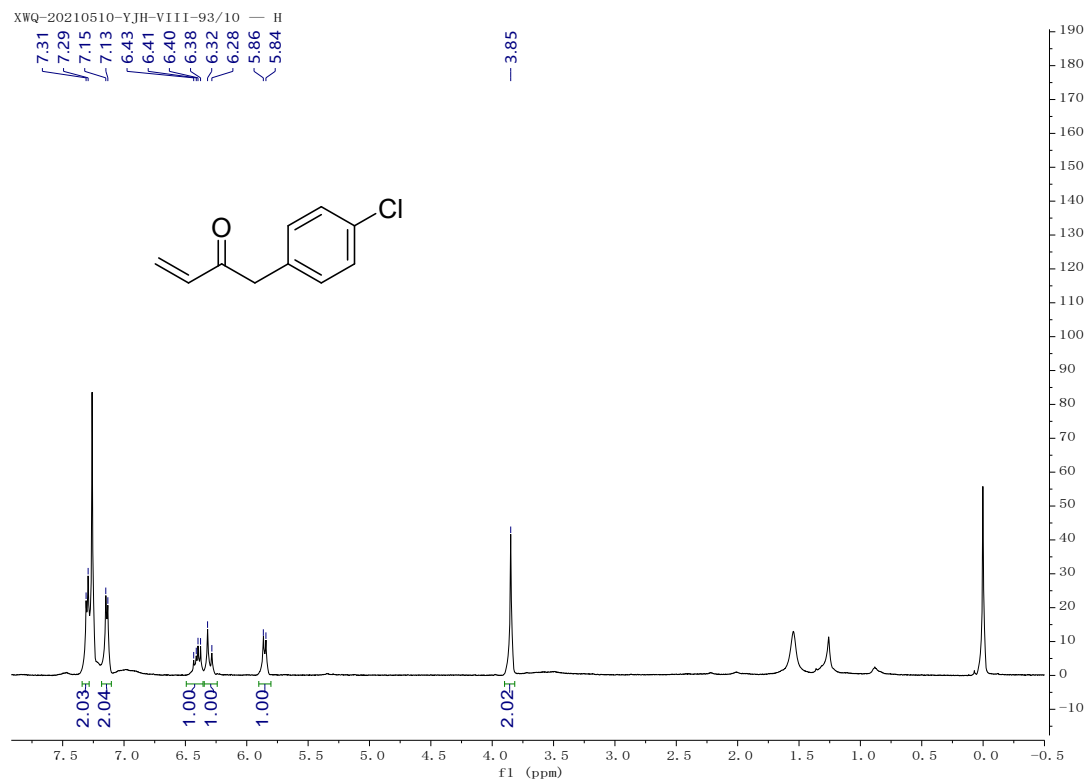

<sup>13</sup>C NMR spectrum of compound **16j** (126 MHz, Chloroform-*d*)

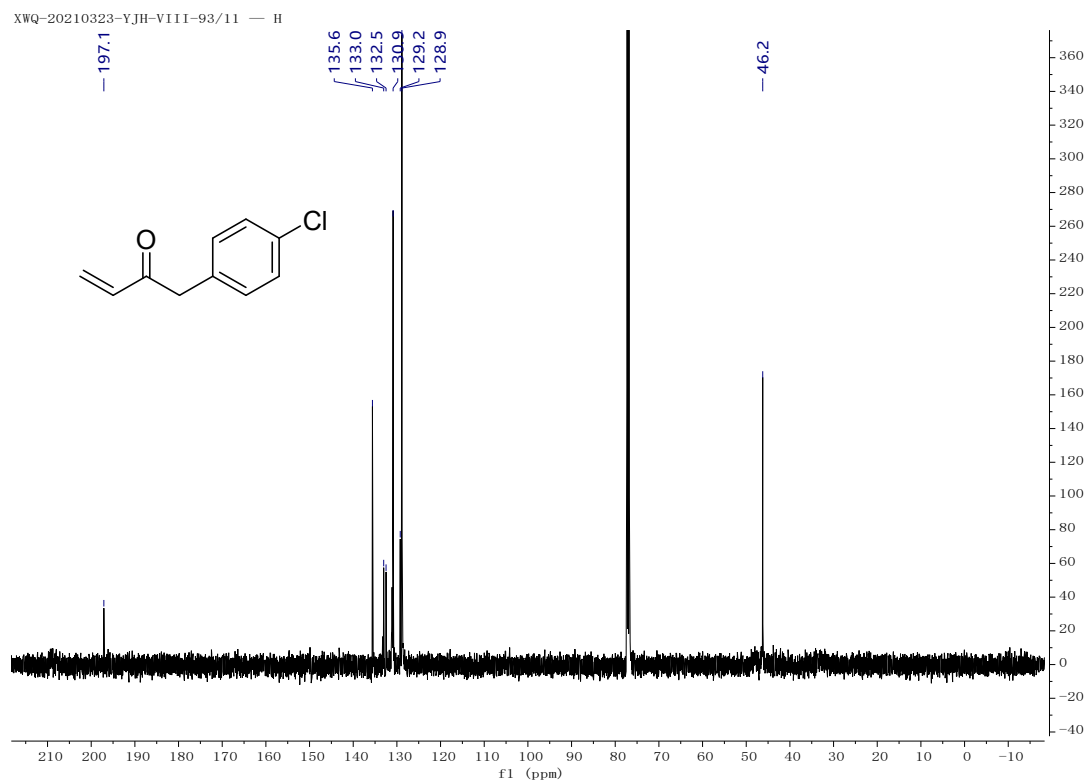



<sup>1</sup>H NMR spectrum of compound **S12k** (500 MHz, Chloroform-*d*)

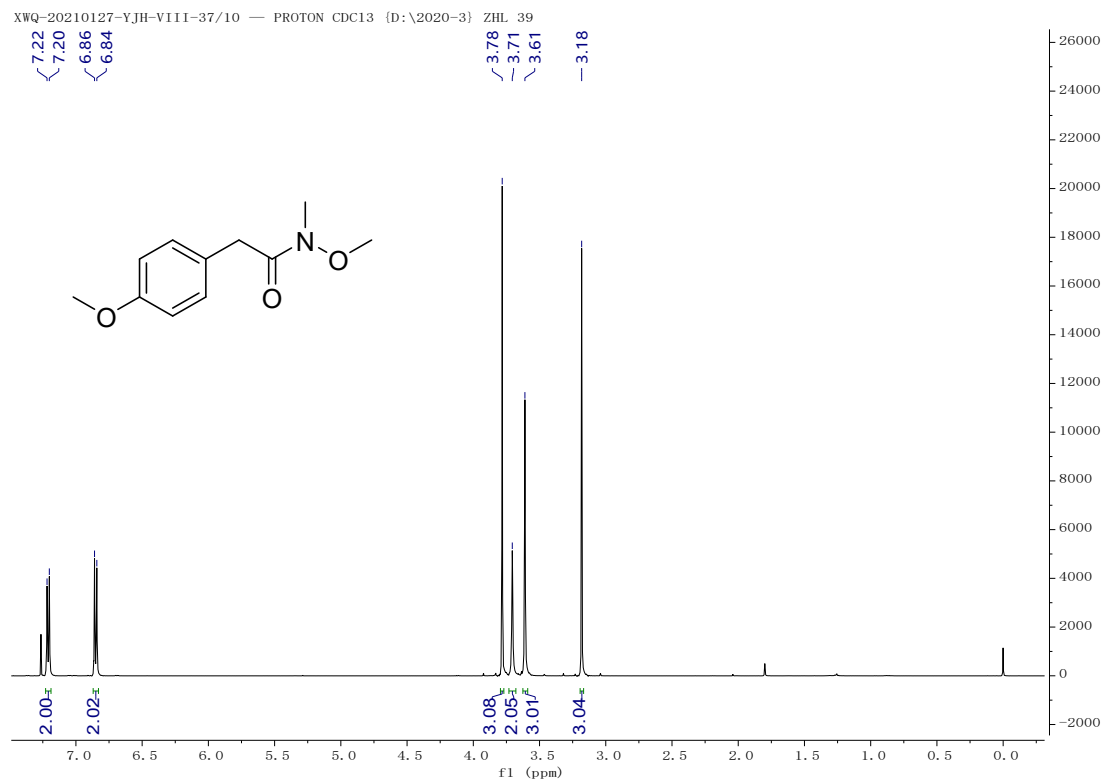

<sup>13</sup>C NMR spectrum of compound **S12k** (126 MHz, Chloroform-*d*)

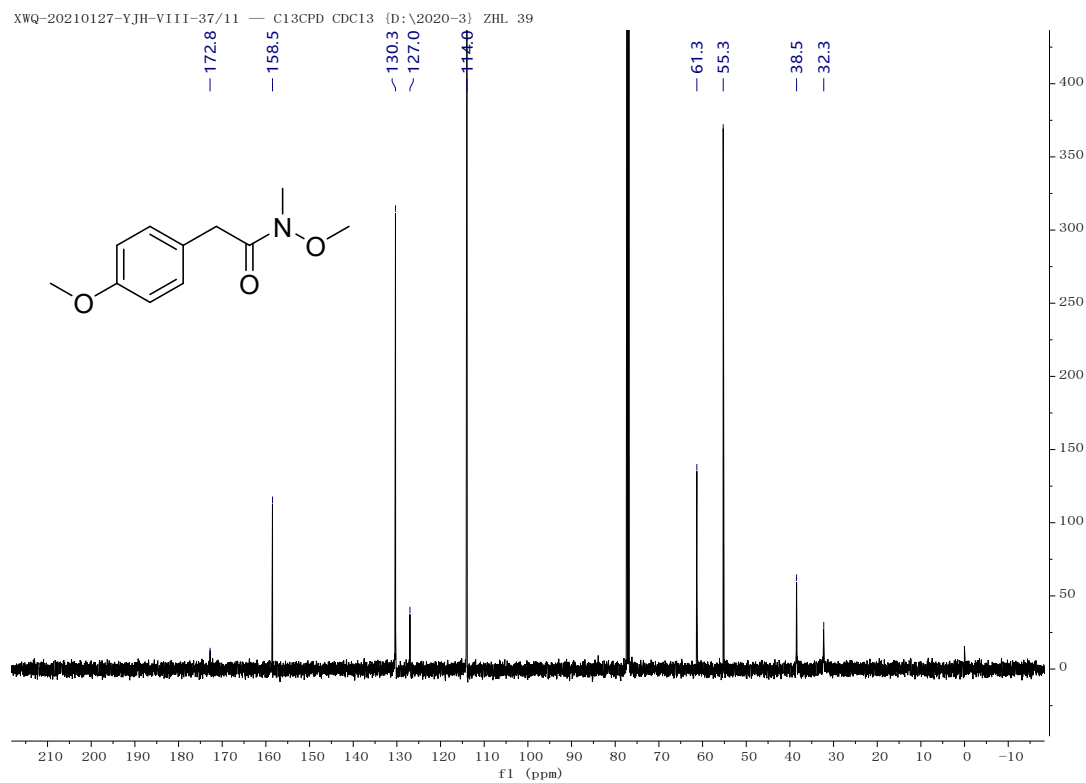

<sup>1</sup>H NMR spectrum of compound **16k** (500 MHz, Chloroform-*d*)

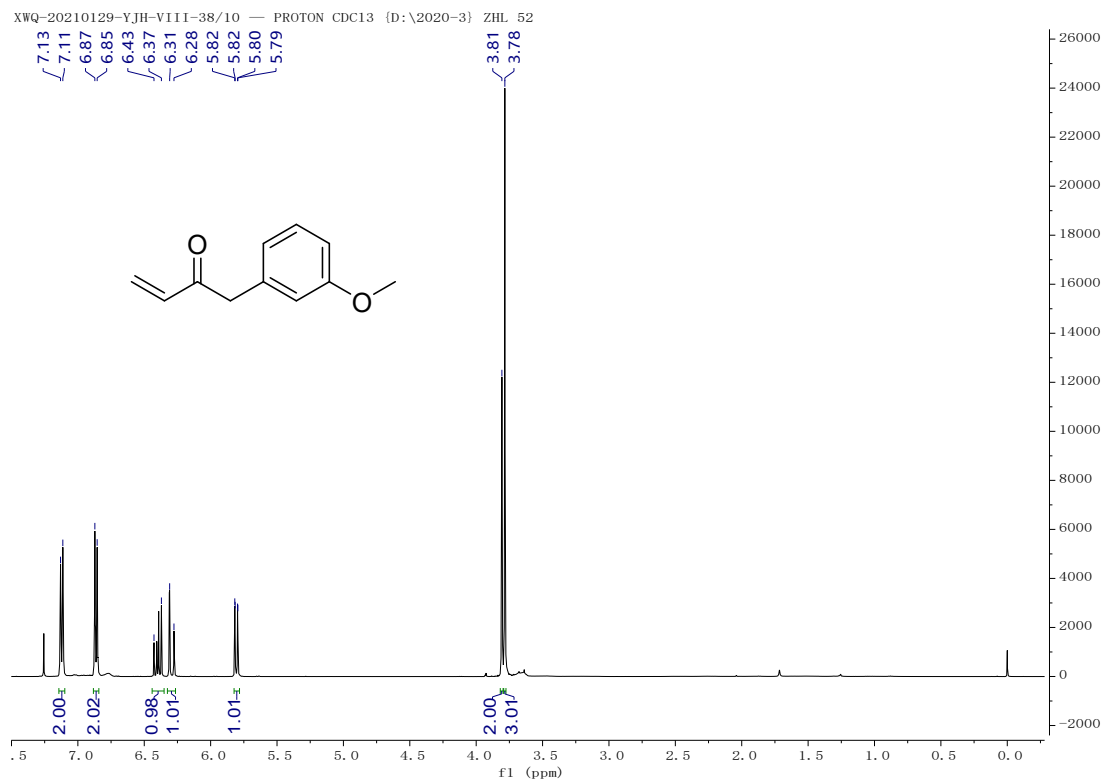

<sup>13</sup>C NMR spectrum of compound **16k** (126 MHz, Chloroform-*d*)

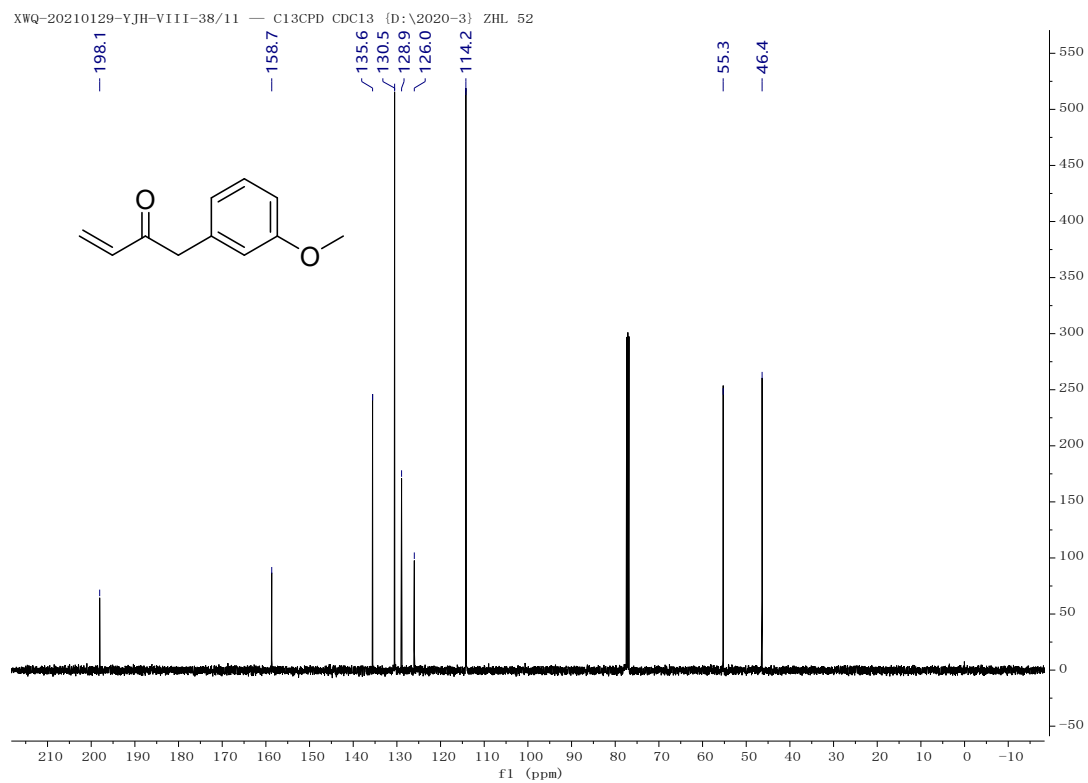

<sup>1</sup>H NMR spectrum of compound **S12I** (500 MHz, Chloroform-*d*)

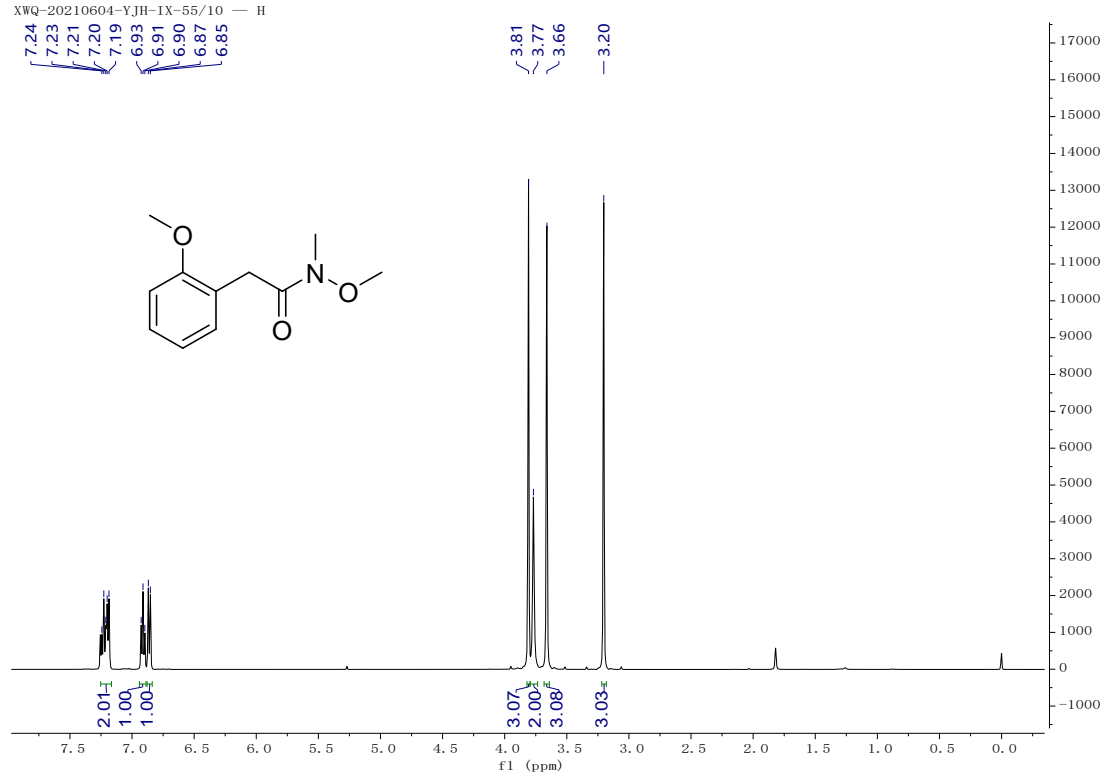

<sup>13</sup>C NMR spectrum of compound **S12I** (126 MHz, Chloroform-*d*)

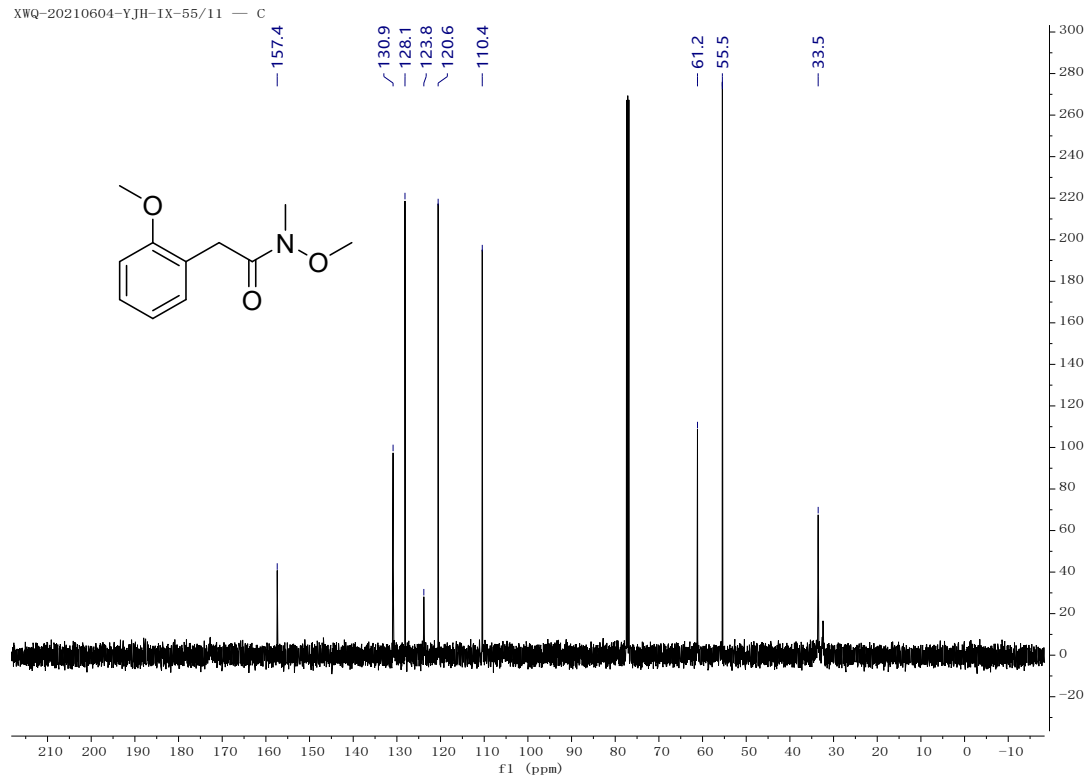

<sup>1</sup>H NMR spectrum of compound **161** (500 MHz, Chloroform-*d*)

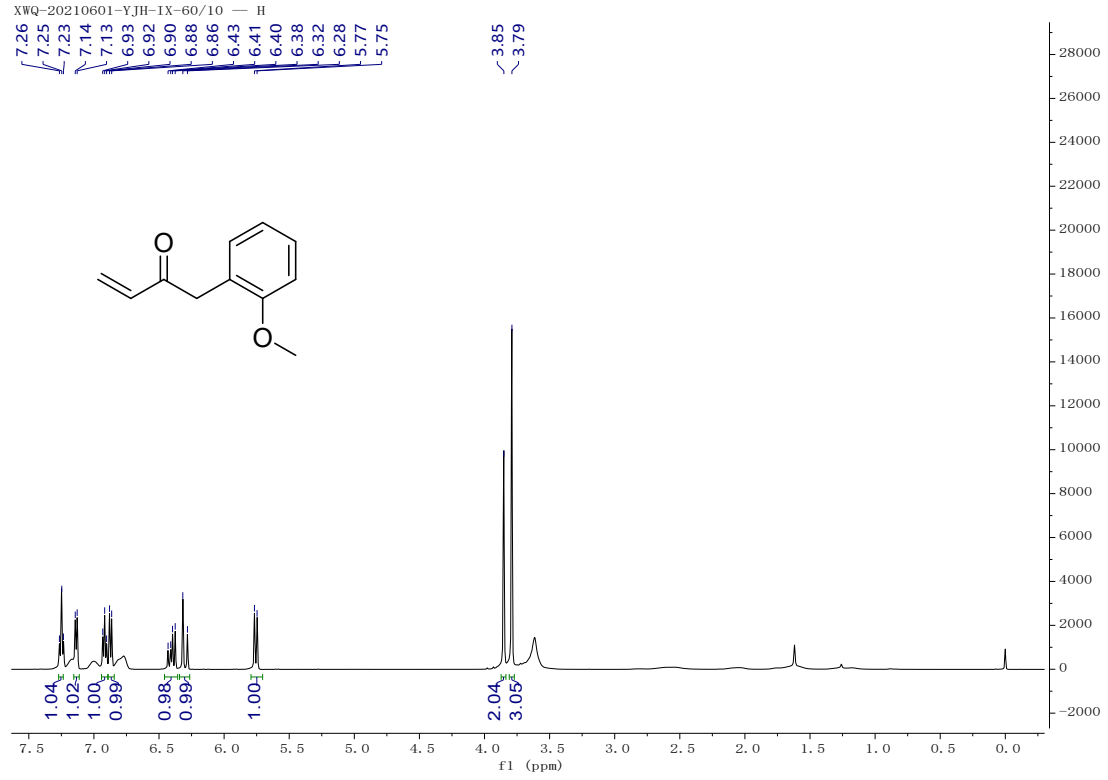

<sup>13</sup>C NMR spectrum of compound **161** (126 MHz, Chloroform-*d*)

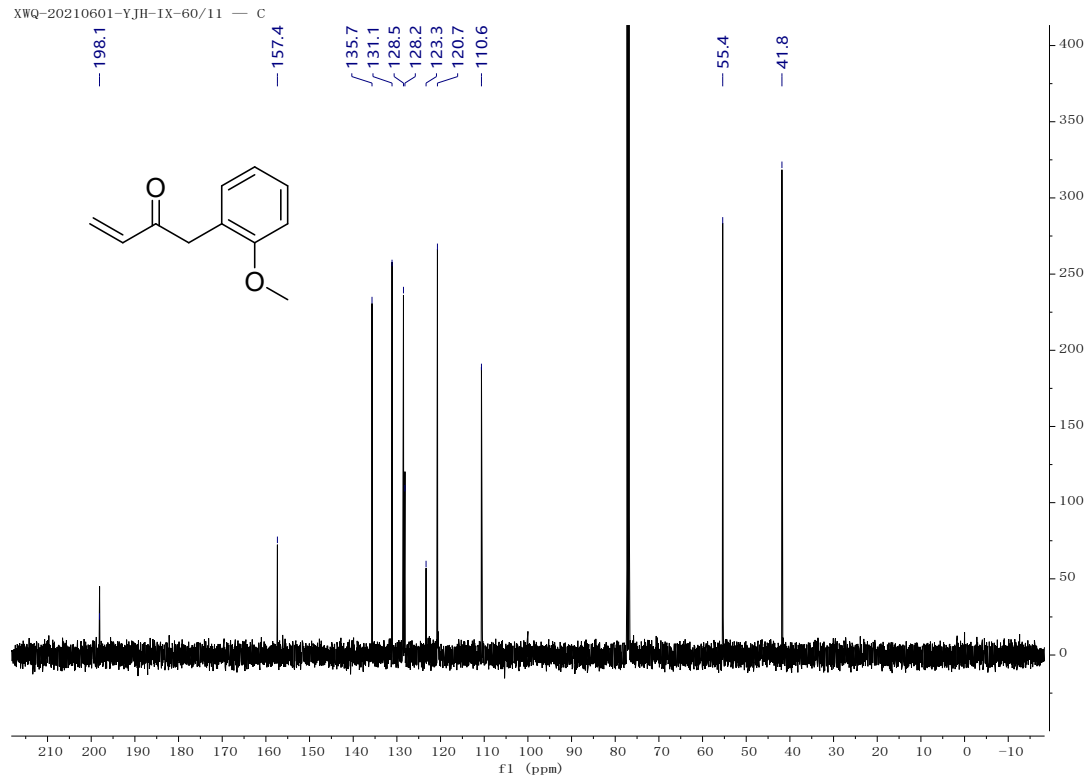

<sup>1</sup>H NMR spectrum of compound **S12m** (500 MHz, Chloroform-*d*)

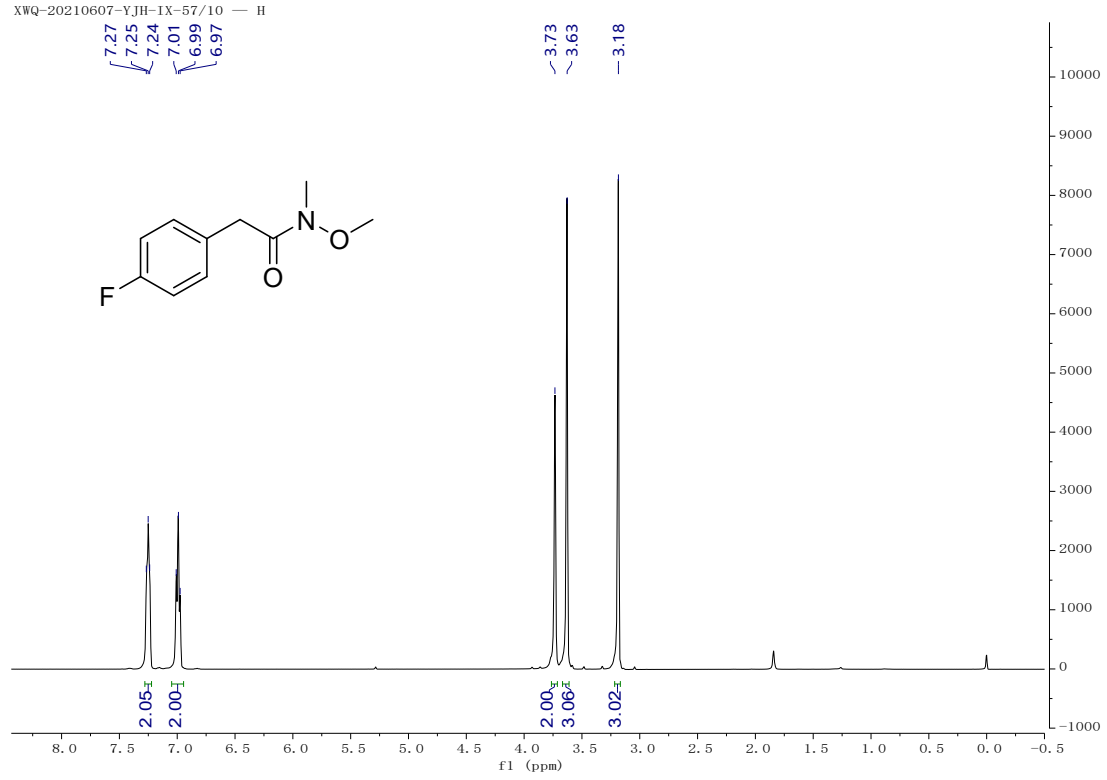

<sup>13</sup>C NMR spectrum of compound **S12m** (126 MHz, Chloroform-*d*)

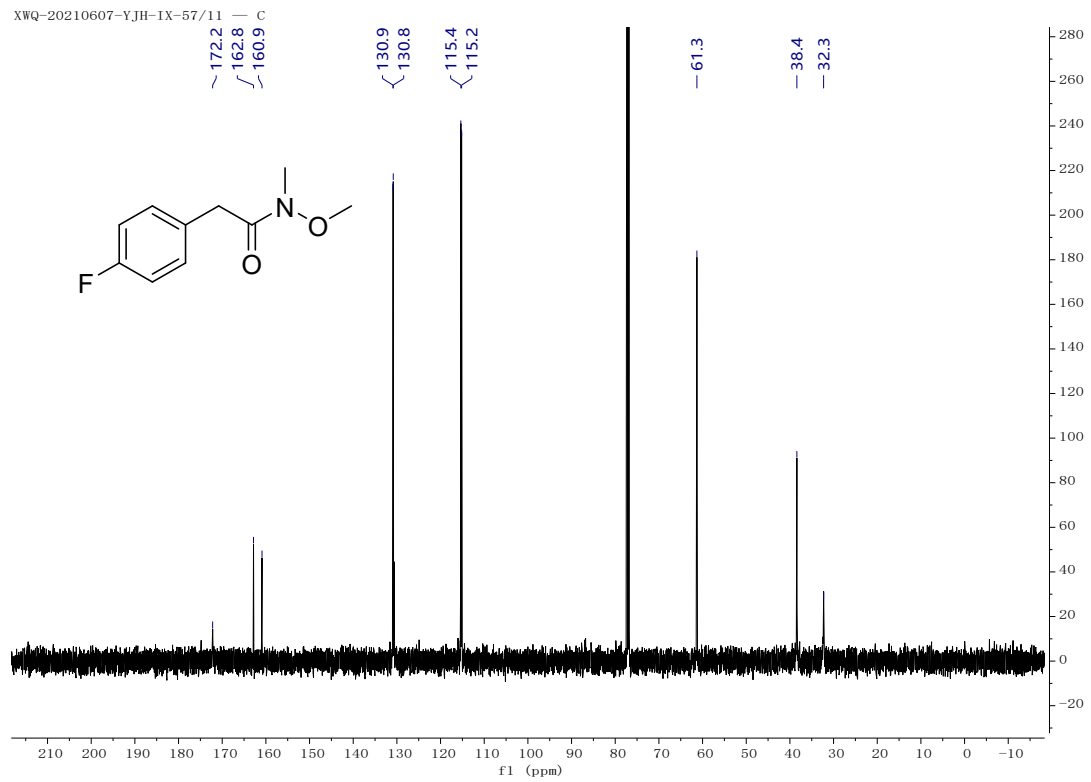

<sup>1</sup>H NMR spectrum of compound **16m** (500 MHz, Chloroform-*d*)

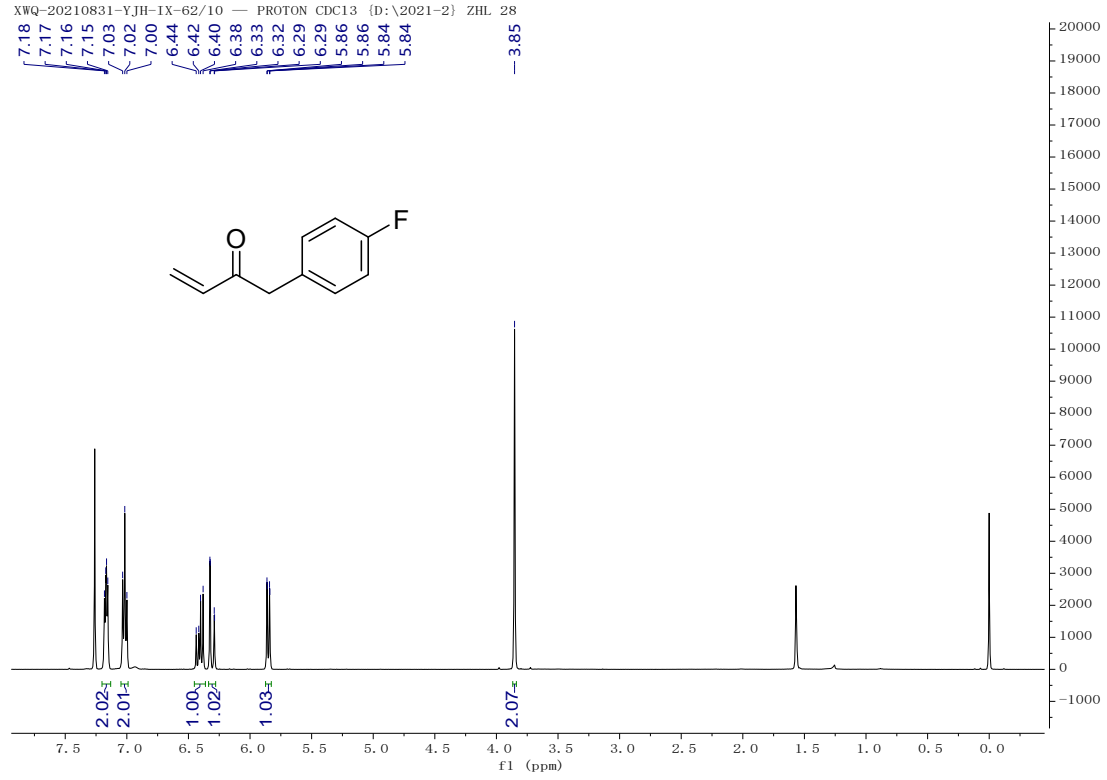

<sup>13</sup>C NMR spectrum of compound **16m** (126 MHz, Chloroform-*d*)

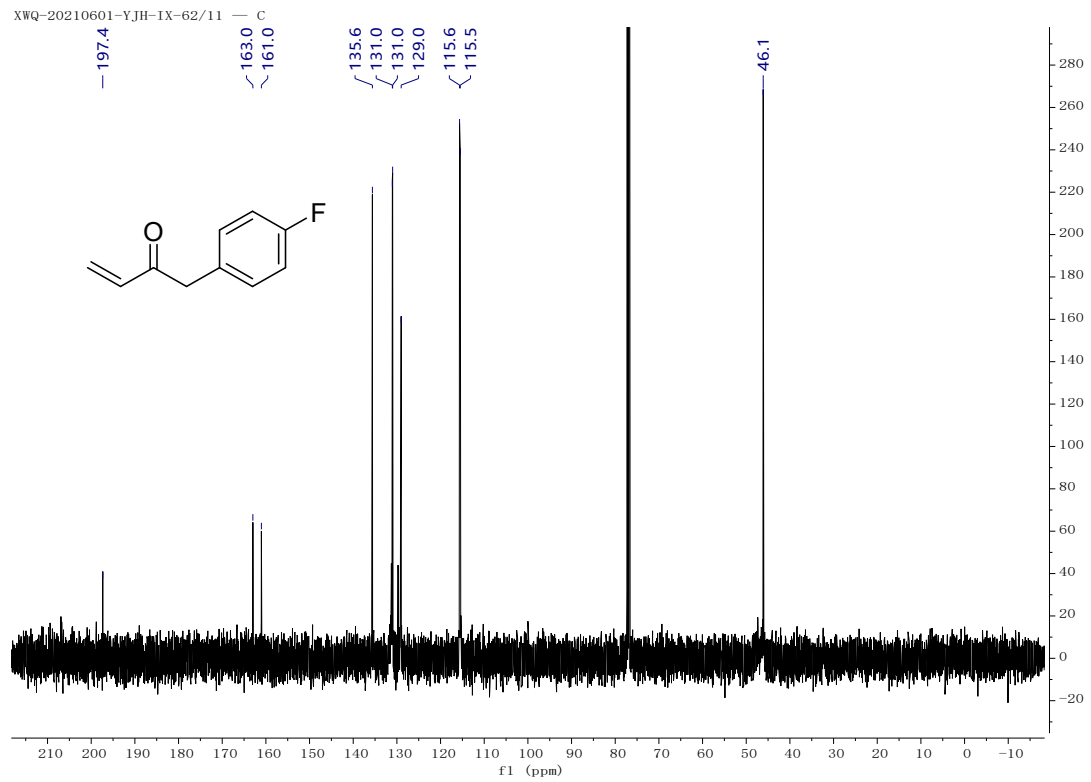

<sup>1</sup>H NMR spectrum of compound **S12n** (500 MHz, Chloroform-*d*)

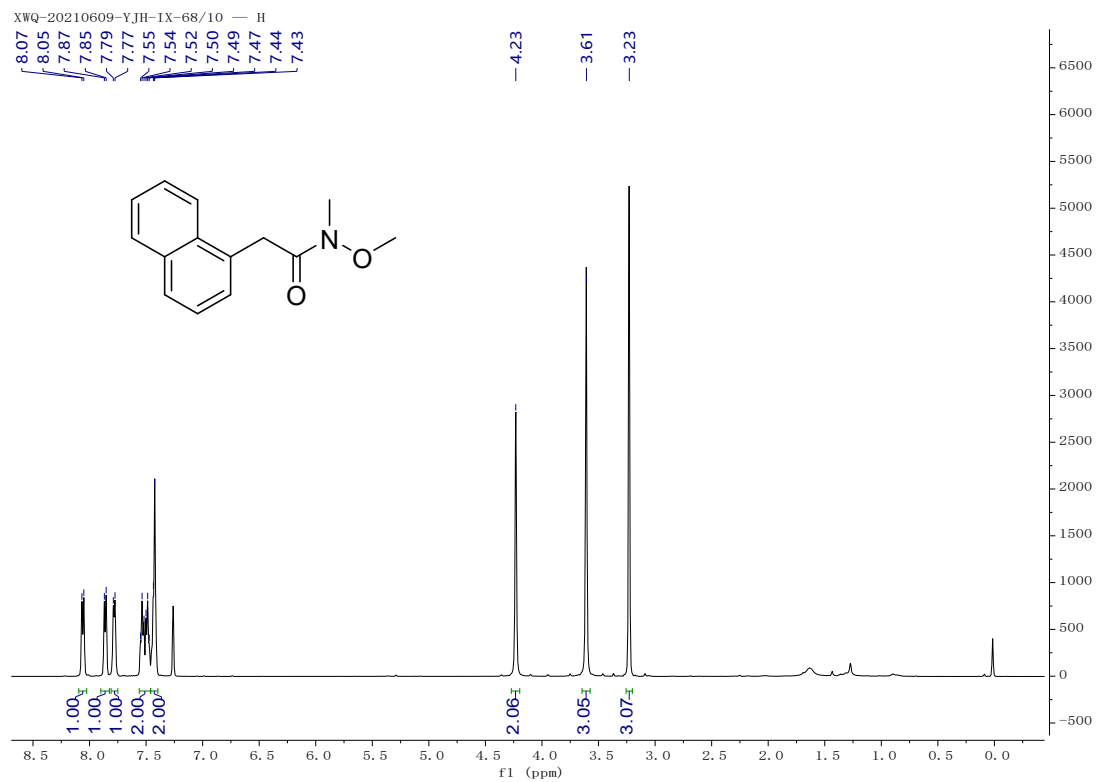

<sup>13</sup>C NMR spectrum of compound **S12n** (126 MHz, Chloroform-*d*)

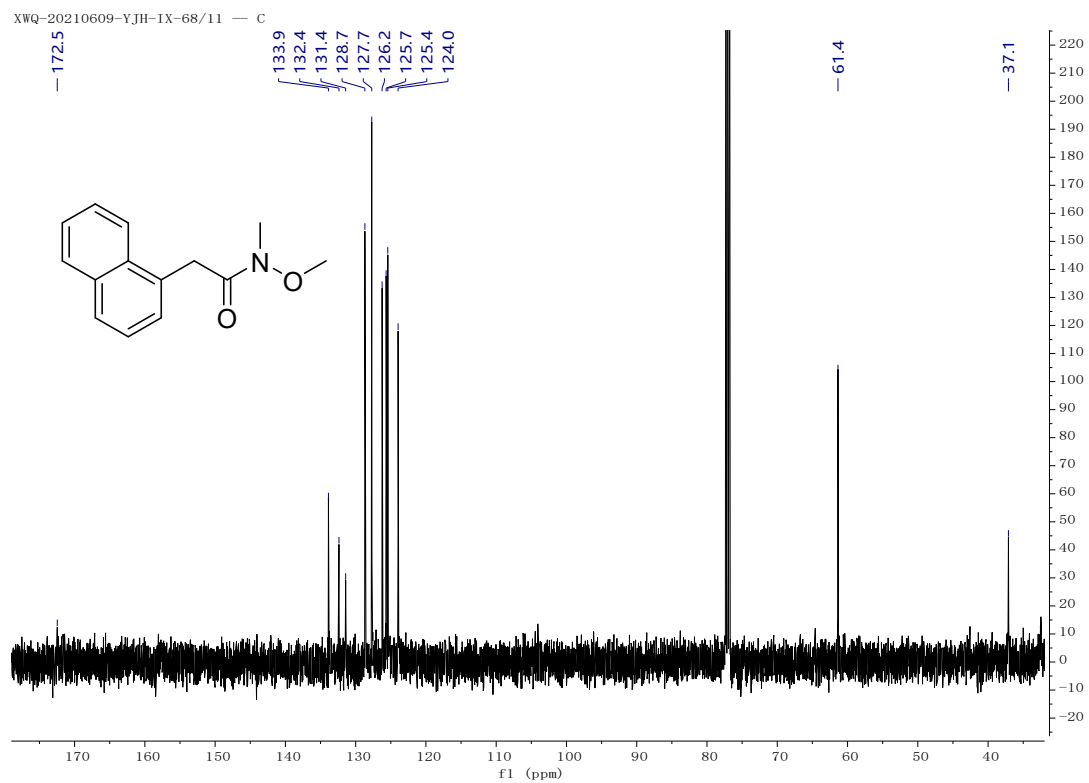

<sup>1</sup>H NMR spectrum of compound **16n** (500 MHz, Chloroform-*d*)

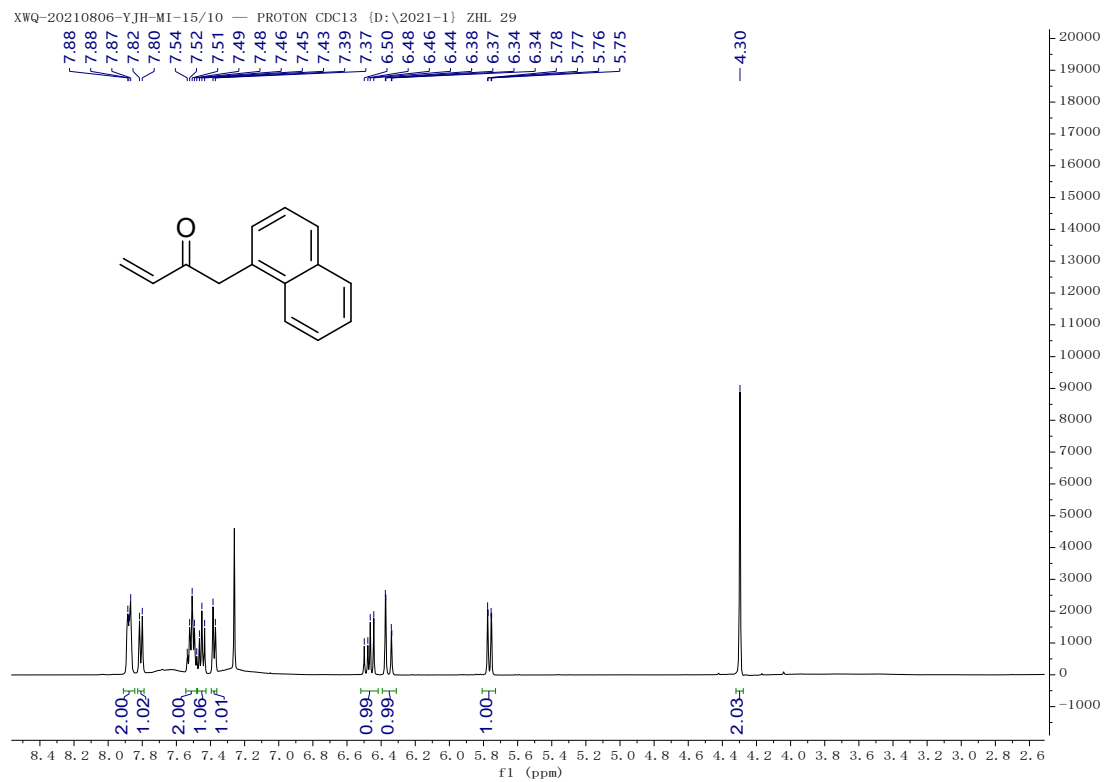

<sup>13</sup>C NMR spectrum of compound **16n** (126 MHz, Chloroform-*d*)

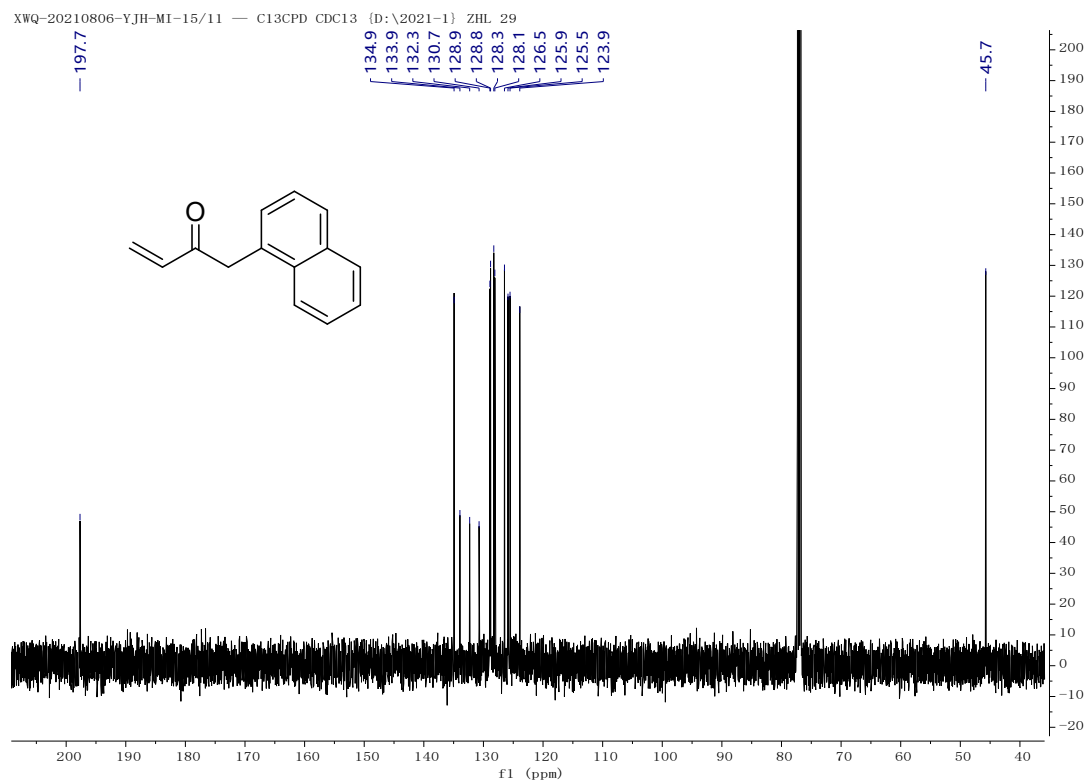



<sup>1</sup>H NMR spectrum of compound **15a** (500 MHz, Chloroform-*d*)

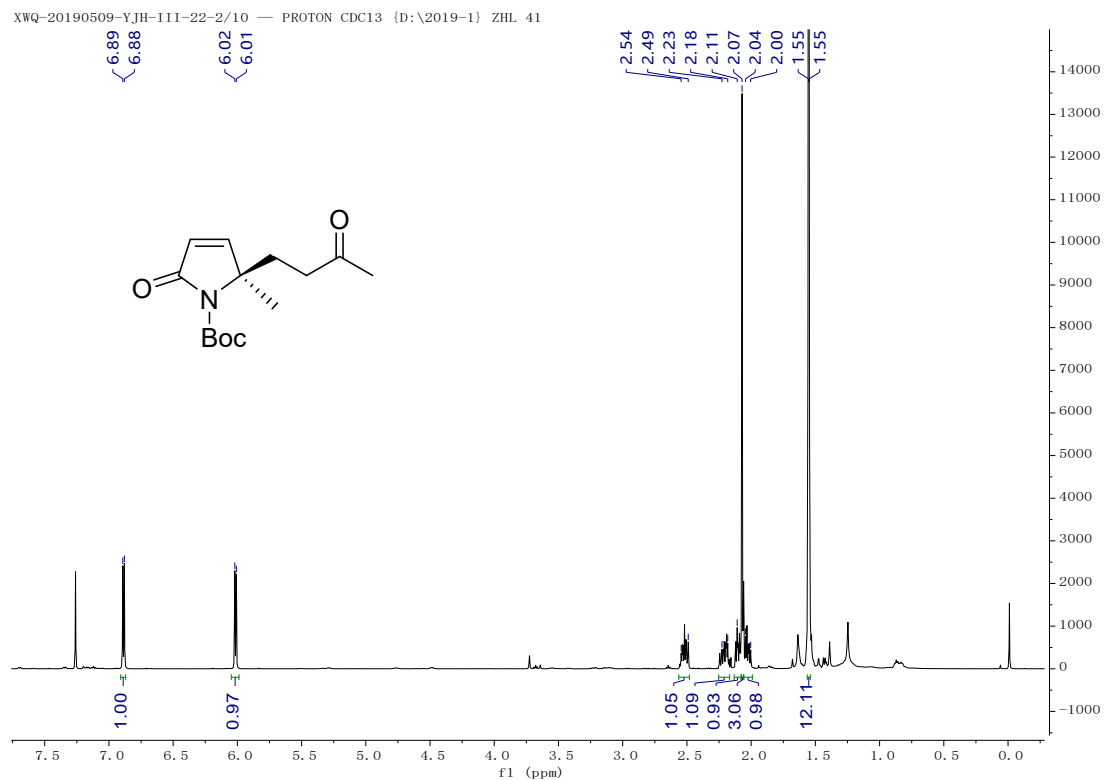

<sup>13</sup>C NMR spectrum of compound **15a** (126 MHz, Chloroform-*d*)

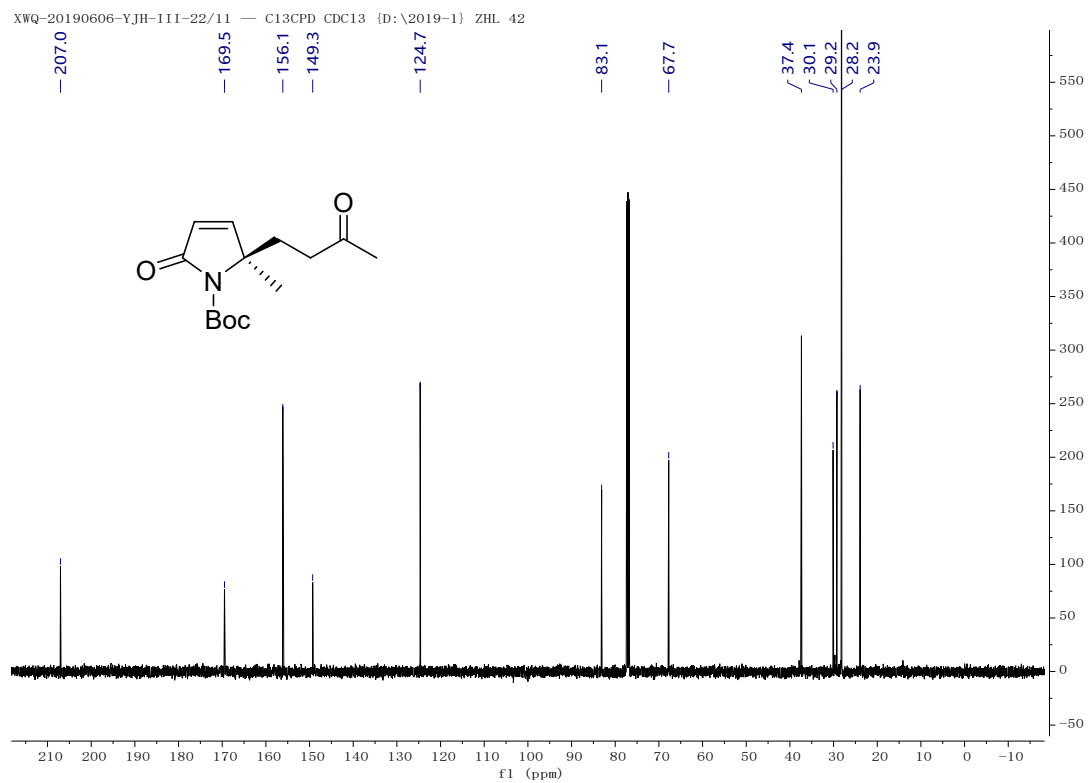

<sup>1</sup>H NMR spectrum of compound **15b** (500 MHz, Chloroform-*d*)

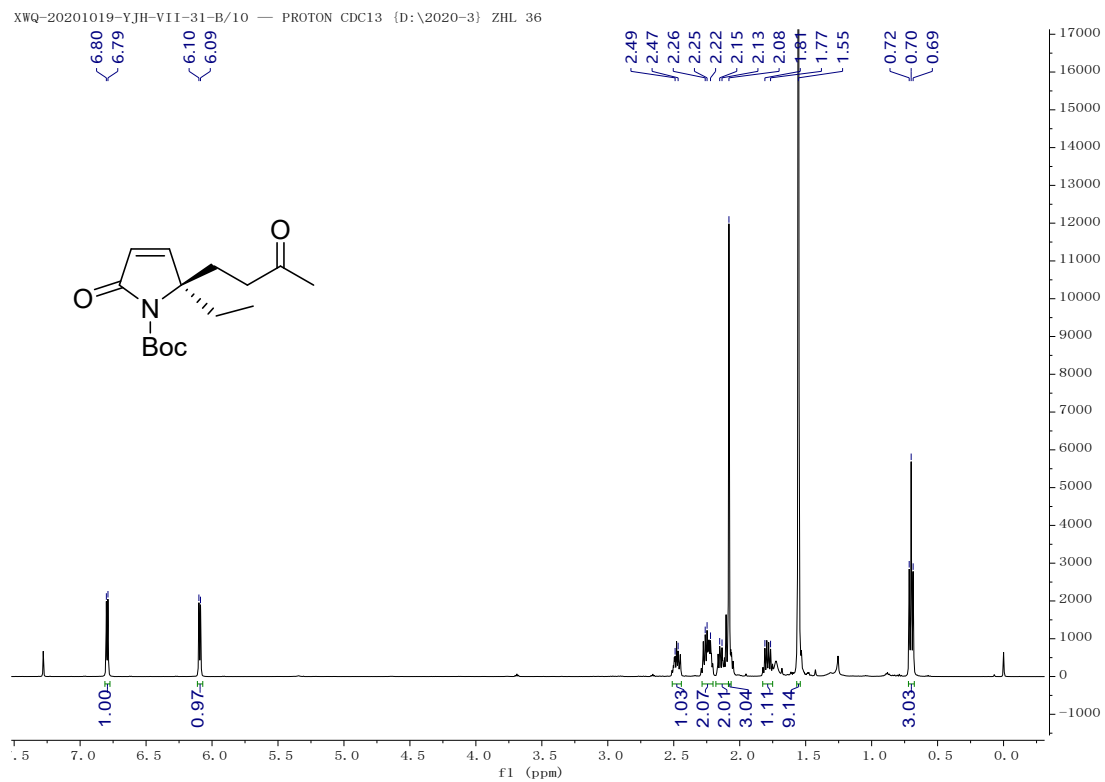

<sup>13</sup>C NMR spectrum of compound **15b** (126 MHz, Chloroform-*d*)

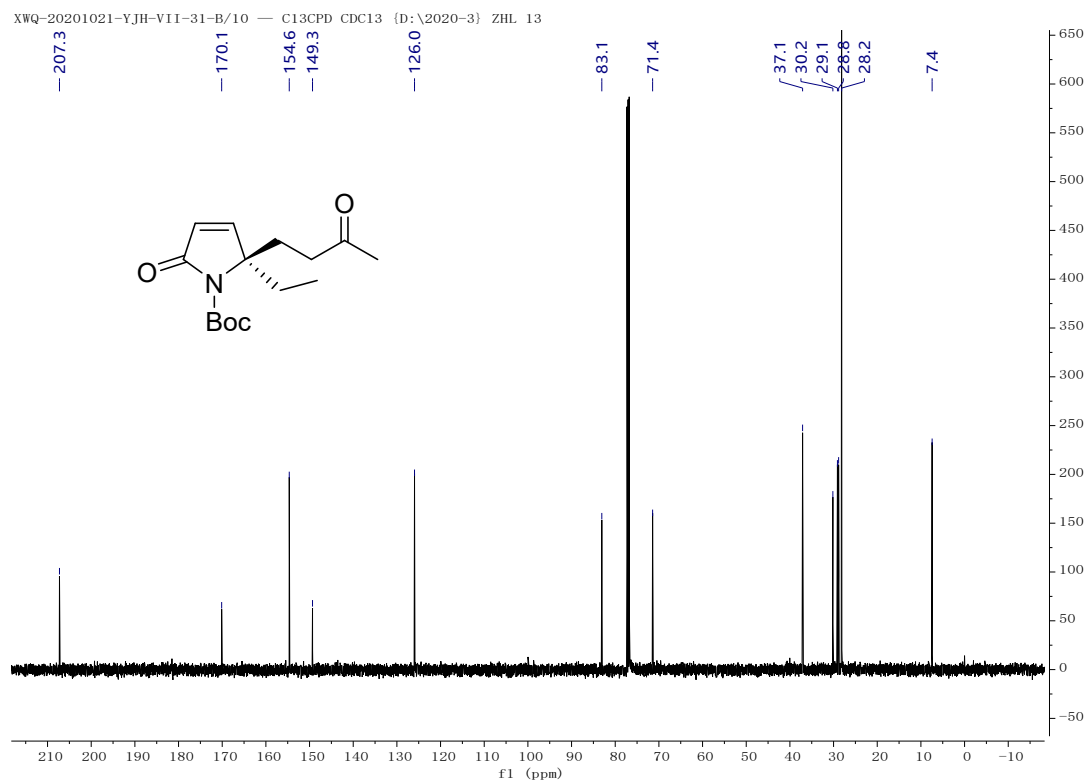

<sup>1</sup>H NMR spectrum of compound **15c** (500 MHz, Chloroform-*d*)

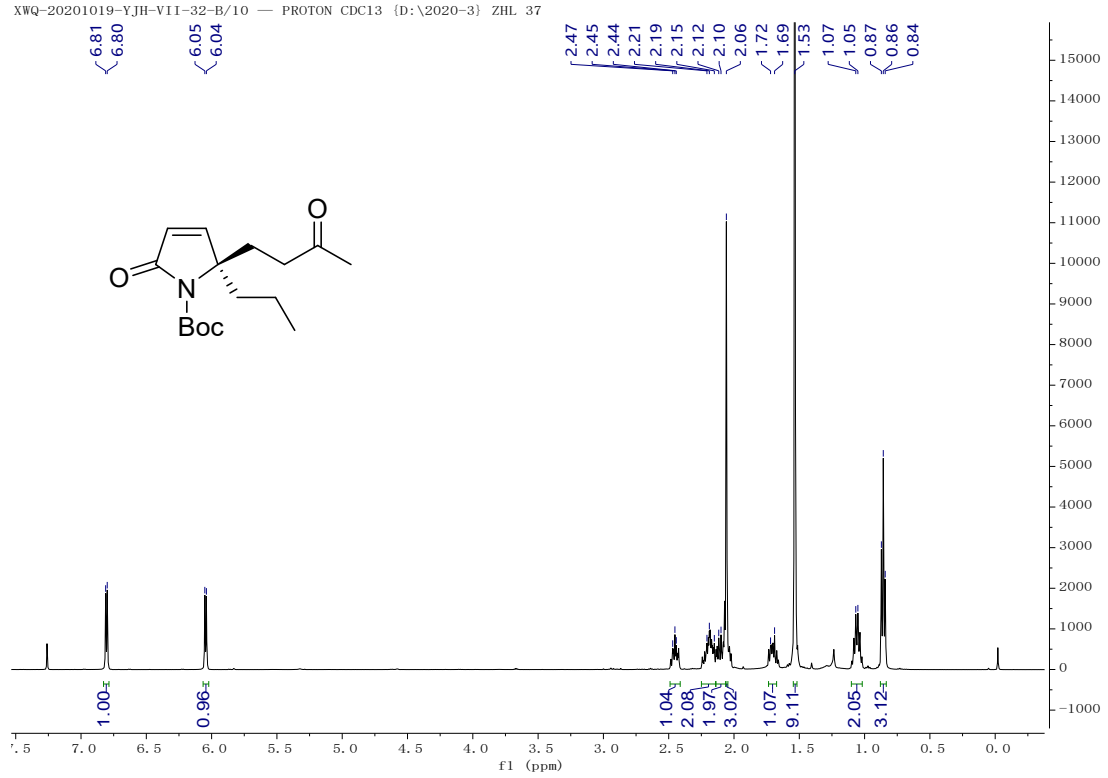

<sup>13</sup>C NMR spectrum of compound **15c** (126 MHz, Chloroform-*d*)

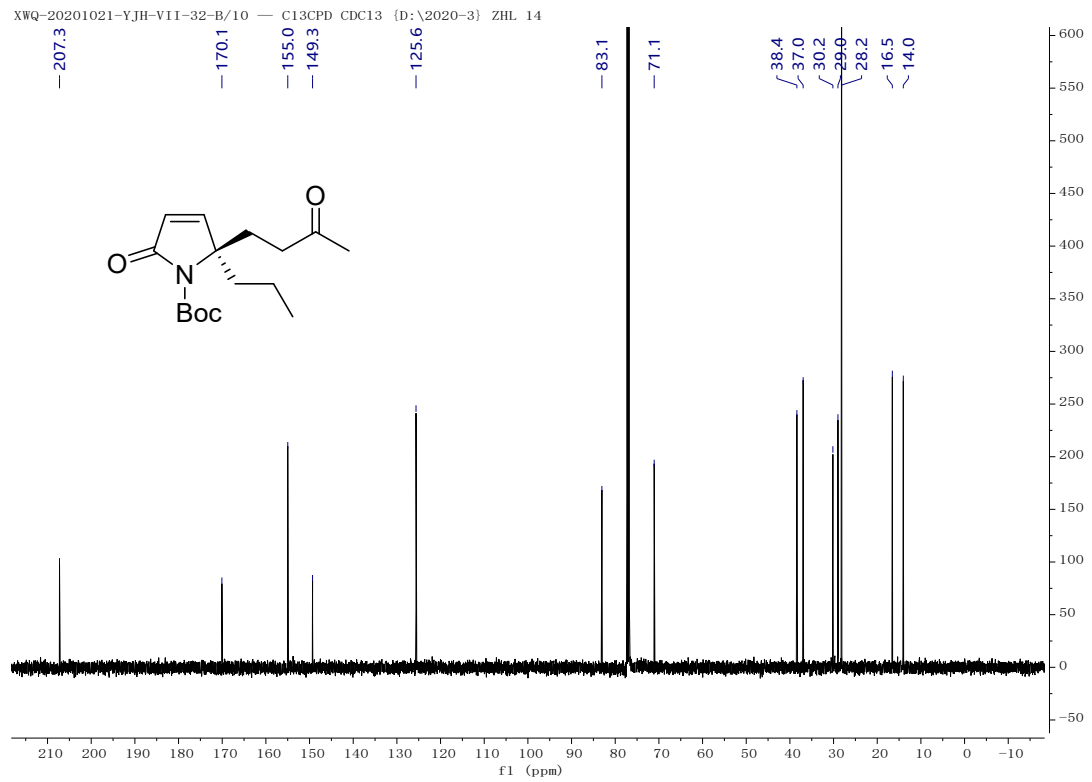

<sup>1</sup>H NMR spectrum of compound **15d** (500 MHz, Chloroform-*d*)

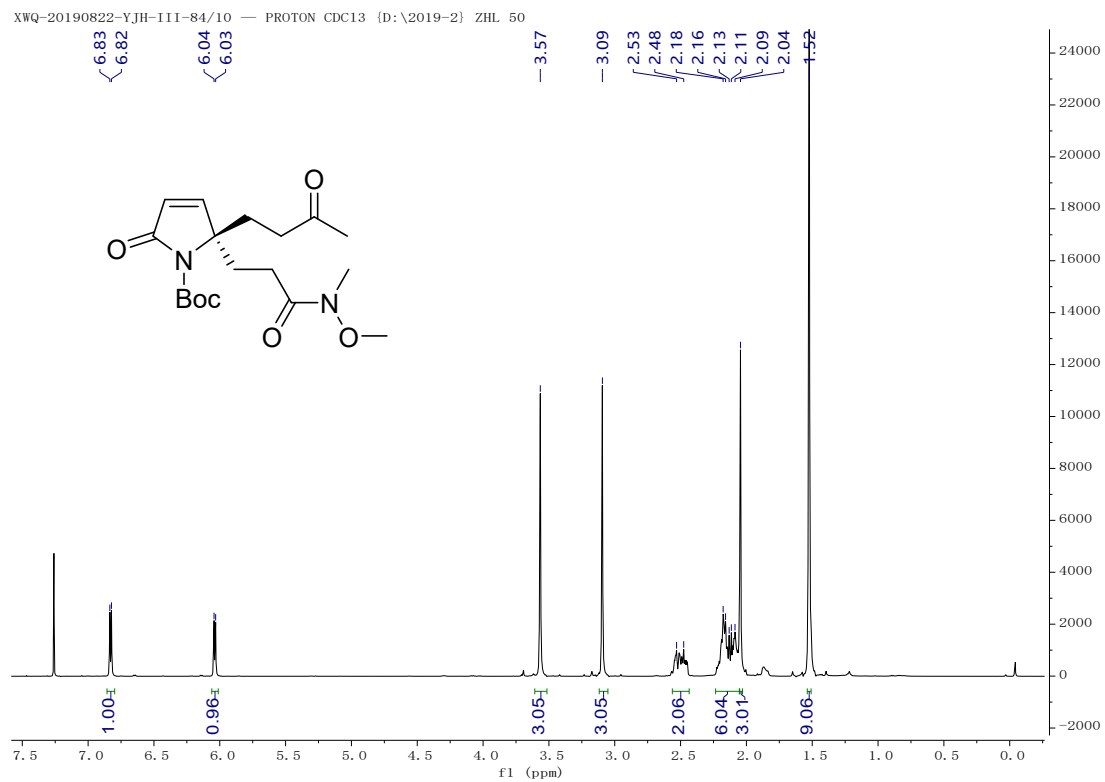

<sup>13</sup>C NMR spectrum of compound **15d** (126 MHz, Chloroform-*d*)

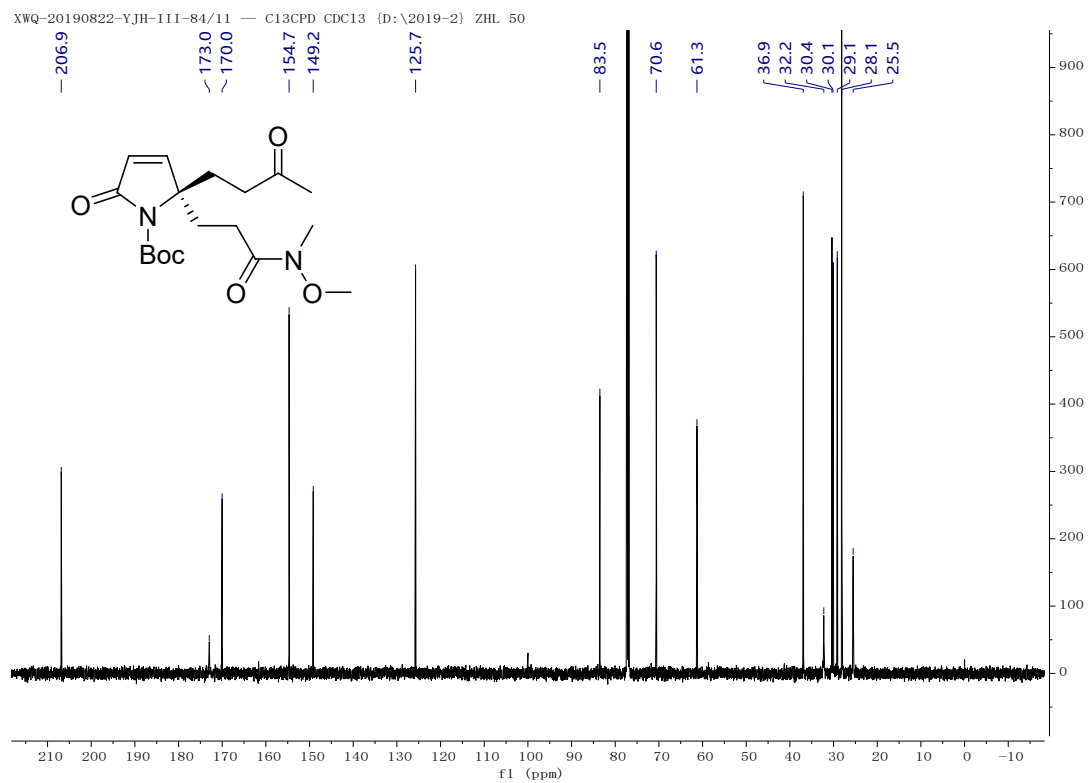

<sup>1</sup>H NMR spectrum of compound **15e** (500 MHz, Chloroform-*d*)

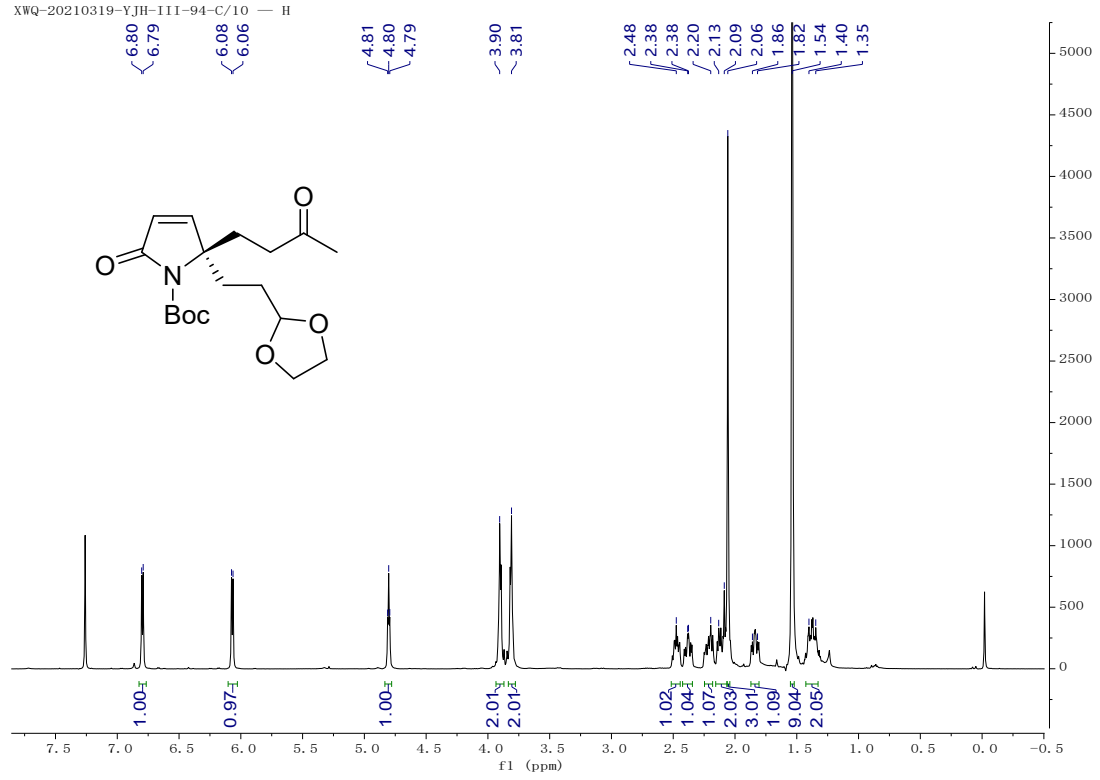

<sup>13</sup>C NMR spectrum of compound **15e** (126 MHz, Chloroform-*d*)

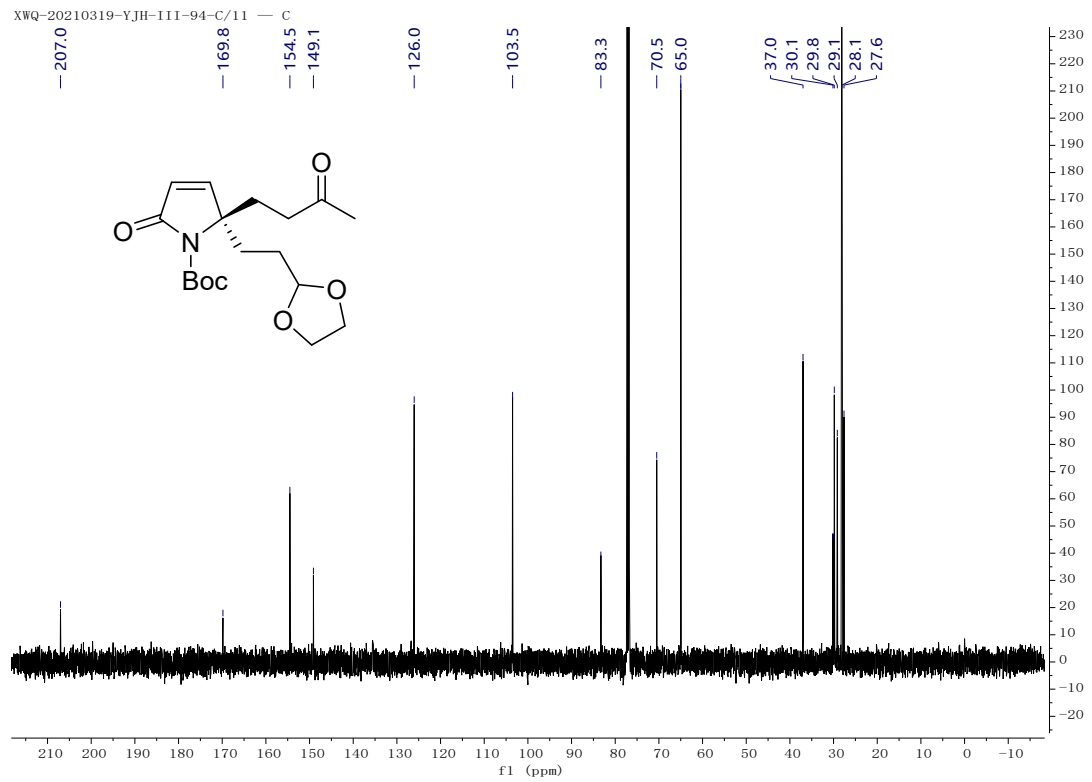

<sup>1</sup>H NMR spectrum of compound **15f** (500 MHz, Chloroform-*d*)

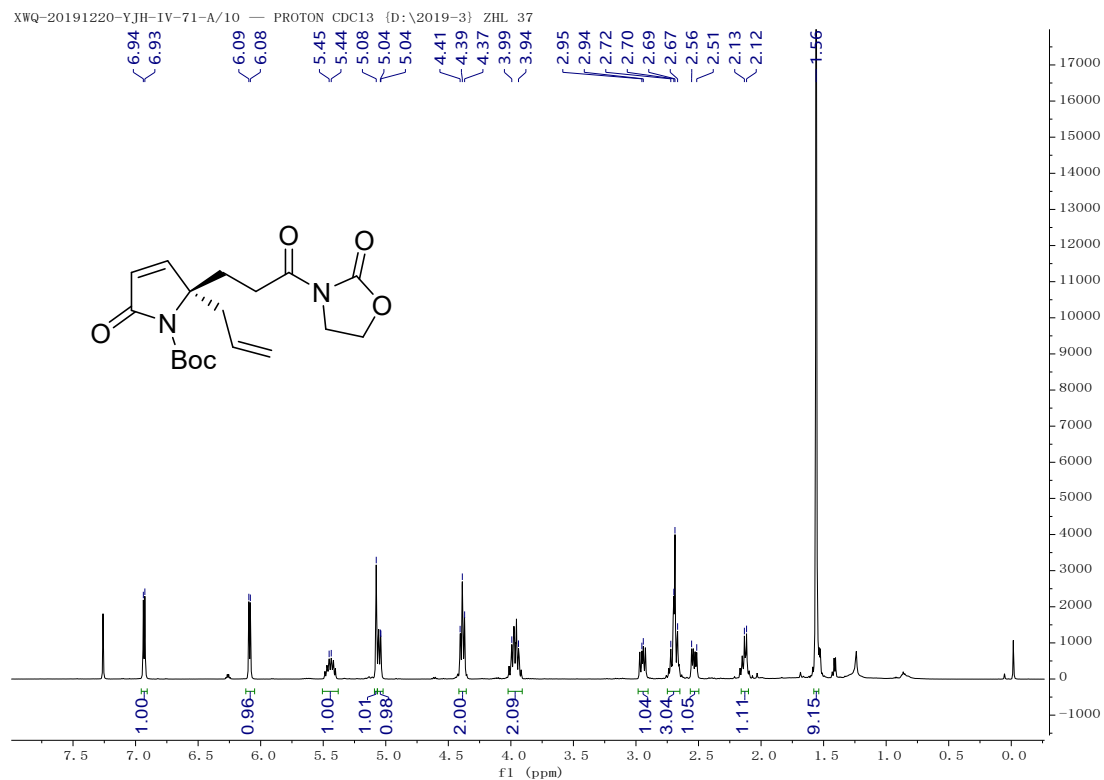

<sup>13</sup>C NMR spectrum of compound **15f** (126 MHz, Chloroform-*d*)

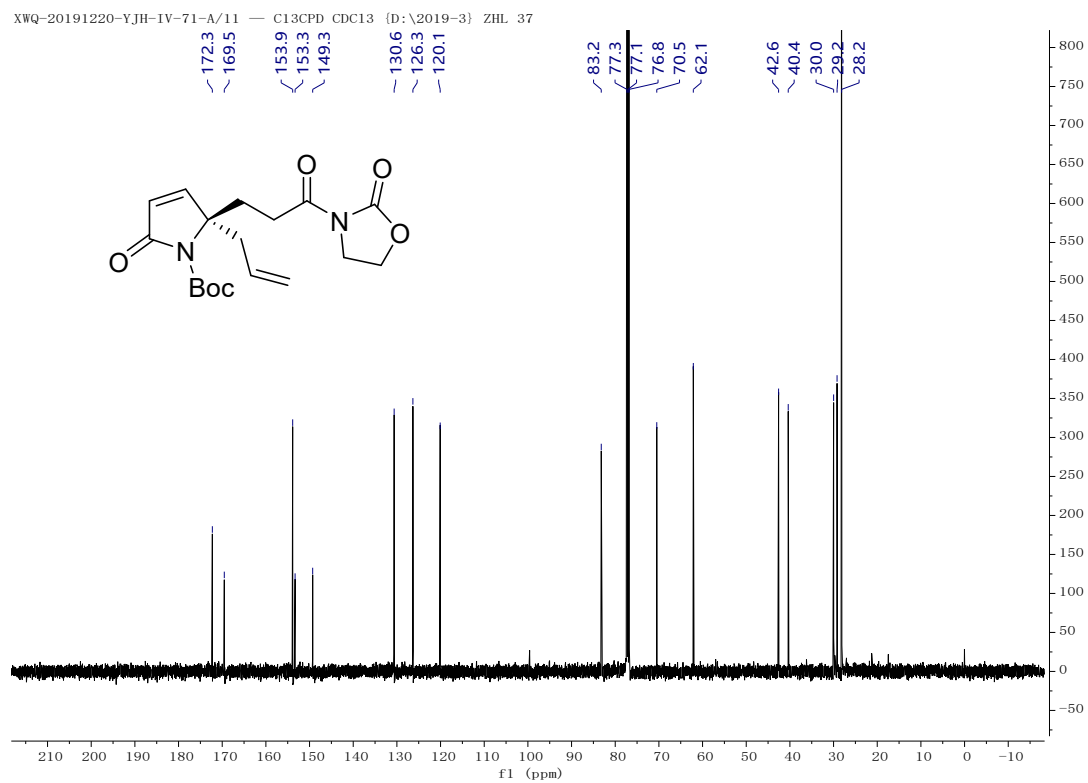

<sup>1</sup>H NMR spectrum of compound **15g** (500 MHz, Chloroform-*d*)

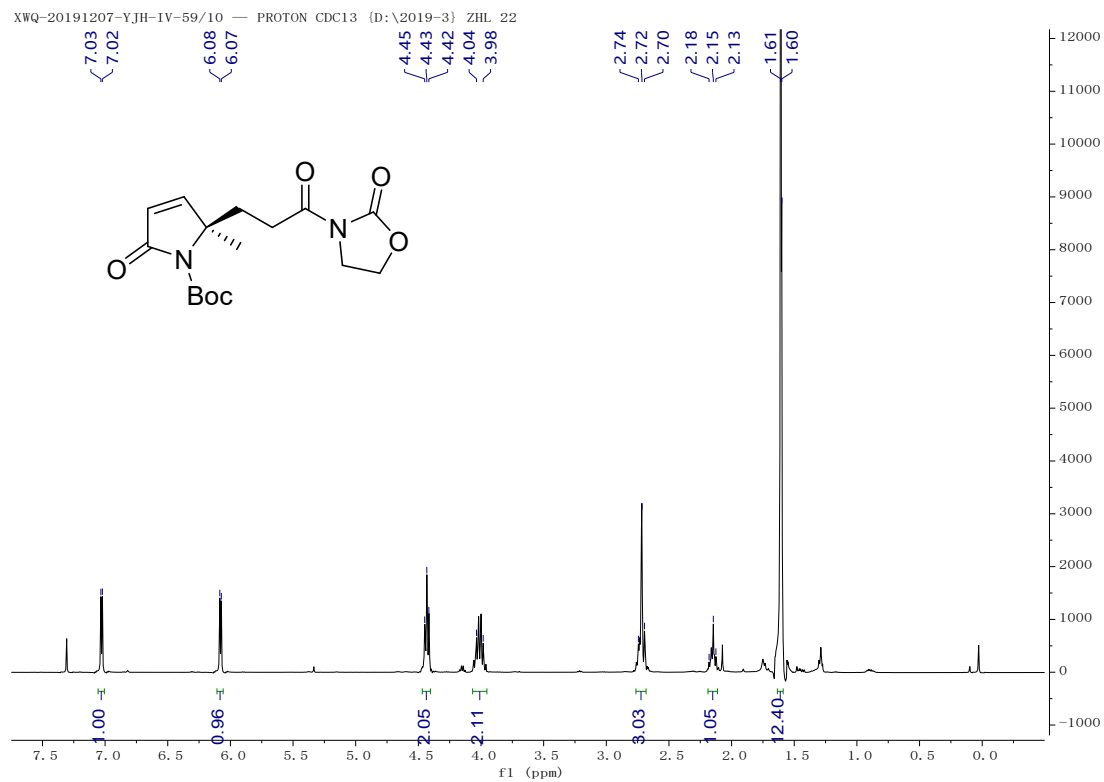

<sup>13</sup>C NMR spectrum of compound **15g** (126 MHz, Chloroform-*d*)

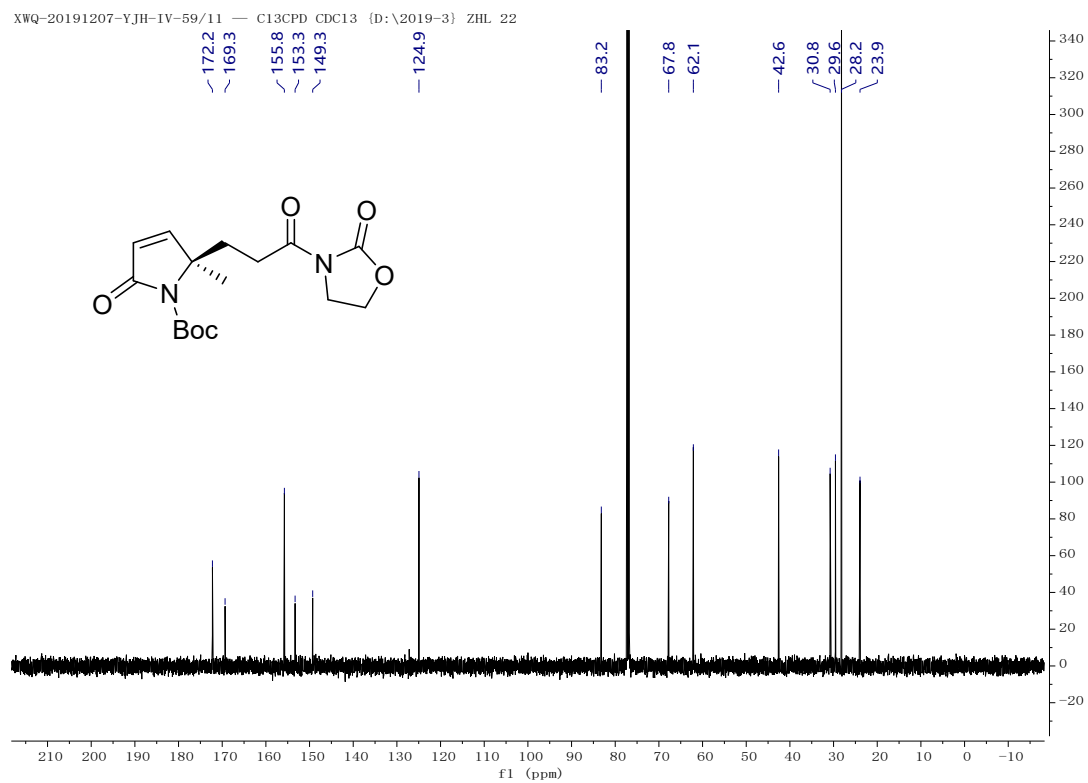

<sup>1</sup>H NMR spectrum of compound **15h** (500 MHz, Chloroform-*d*)

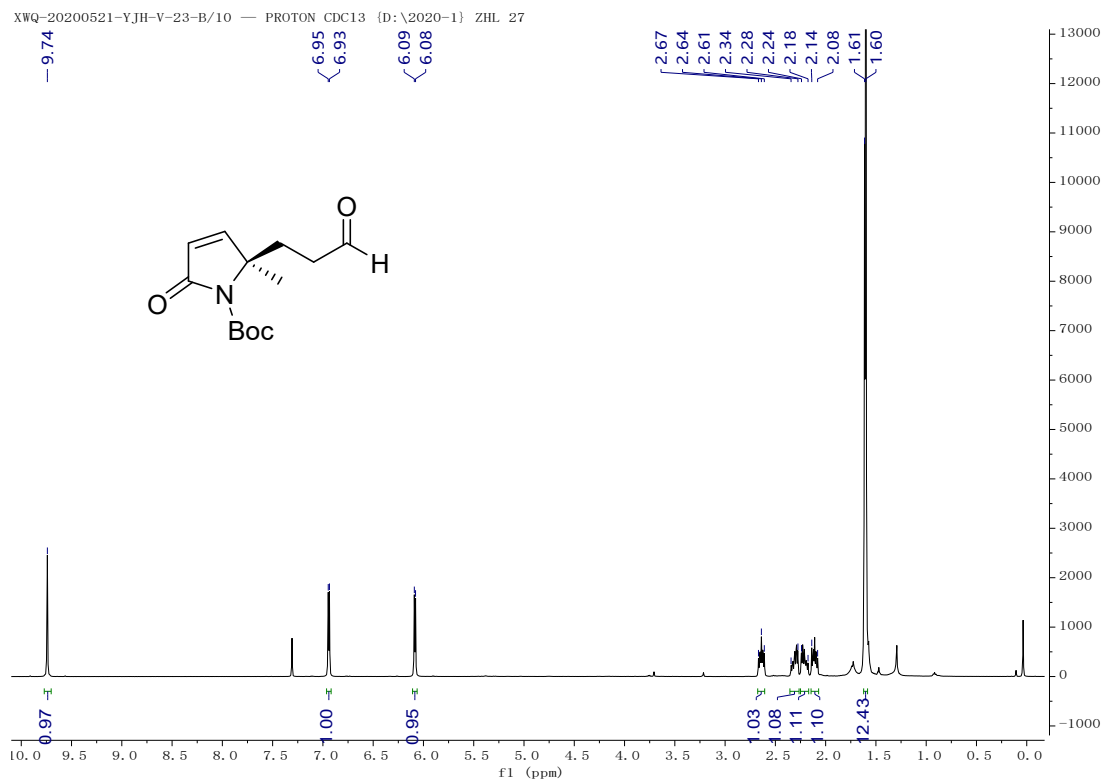

<sup>13</sup>C NMR spectrum of compound **15h** (126 MHz, Chloroform-*d*)

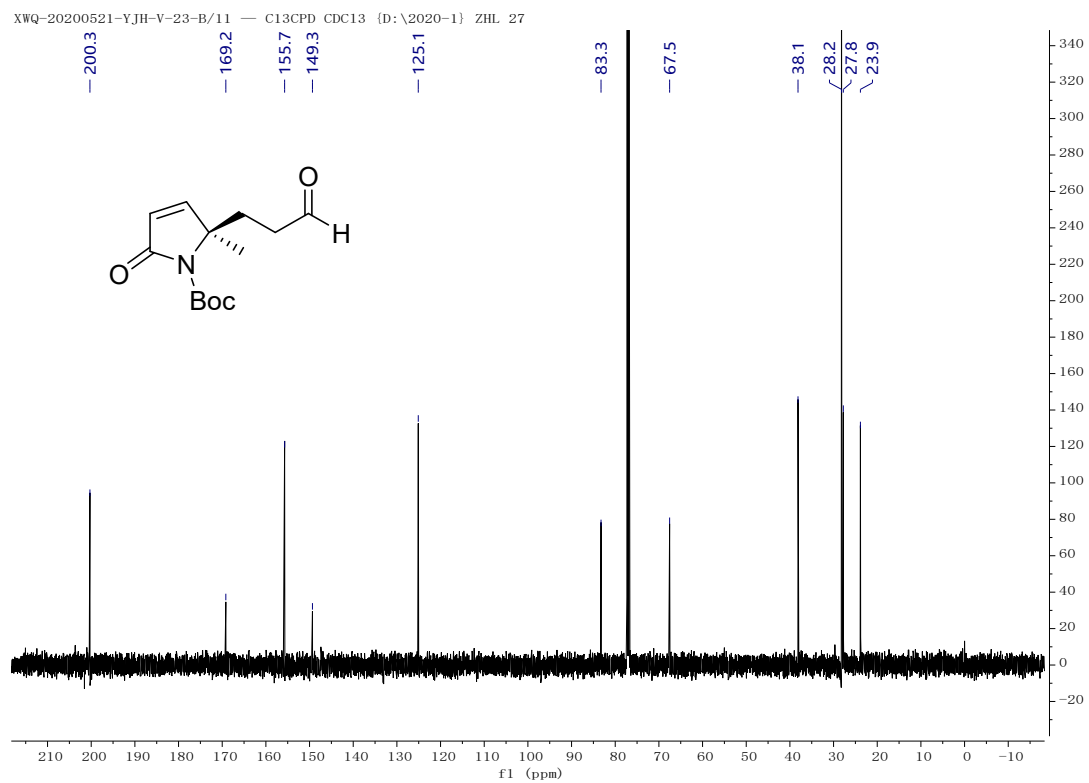



<sup>1</sup>H NMR spectrum of compound **15h1** (500 MHz, Chloroform-*d*)

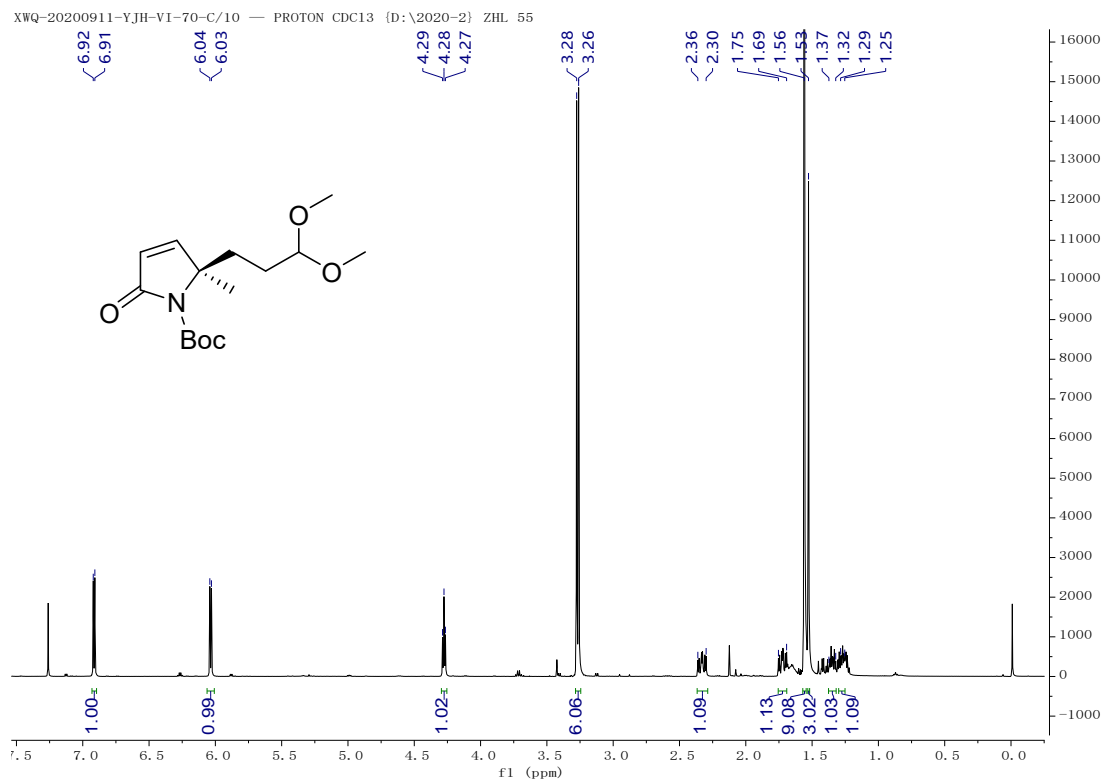

<sup>13</sup>C NMR spectrum of compound **15h1** (126 MHz, Chloroform-*d*)

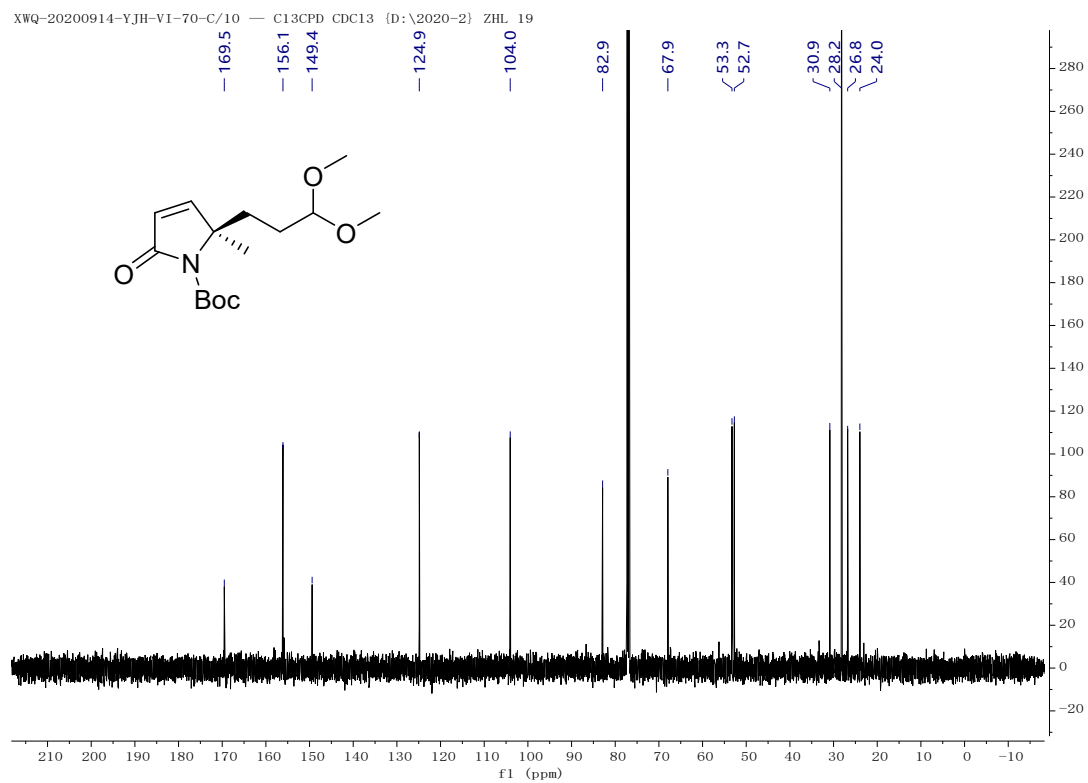

<sup>1</sup>H NMR spectrum of compound **15i** (500 MHz, Chloroform-*d*)

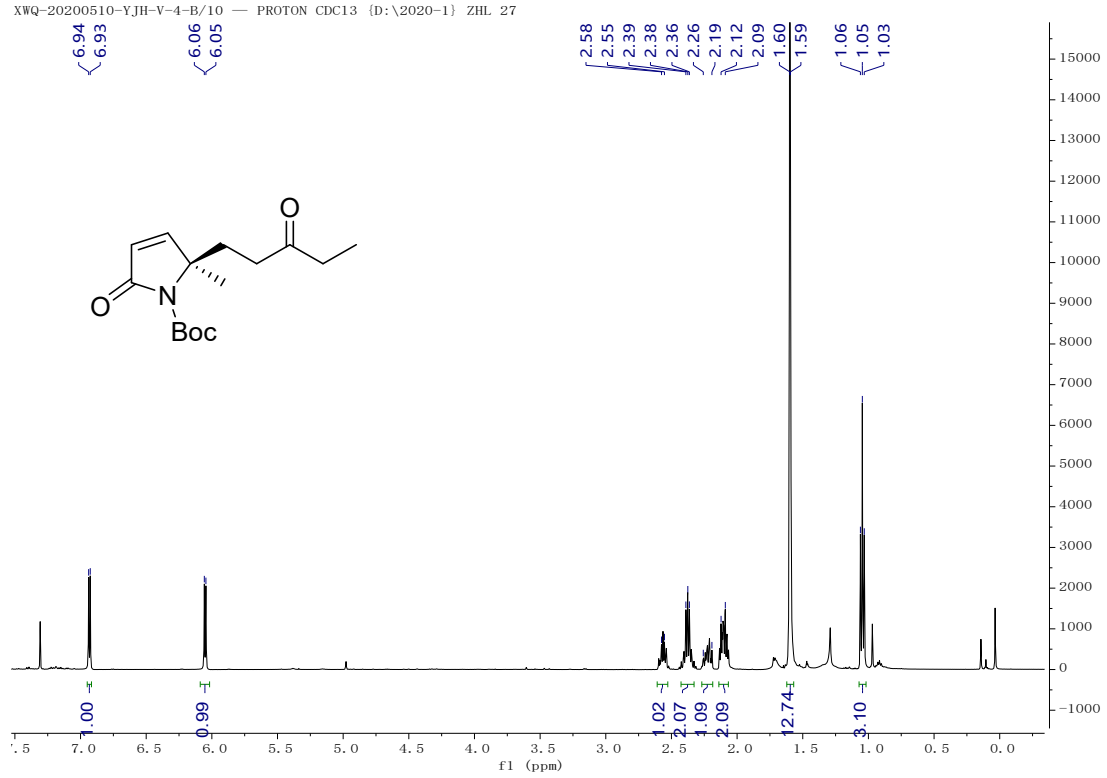

<sup>13</sup>C NMR spectrum of compound **15i** (126 MHz, Chloroform-*d*)

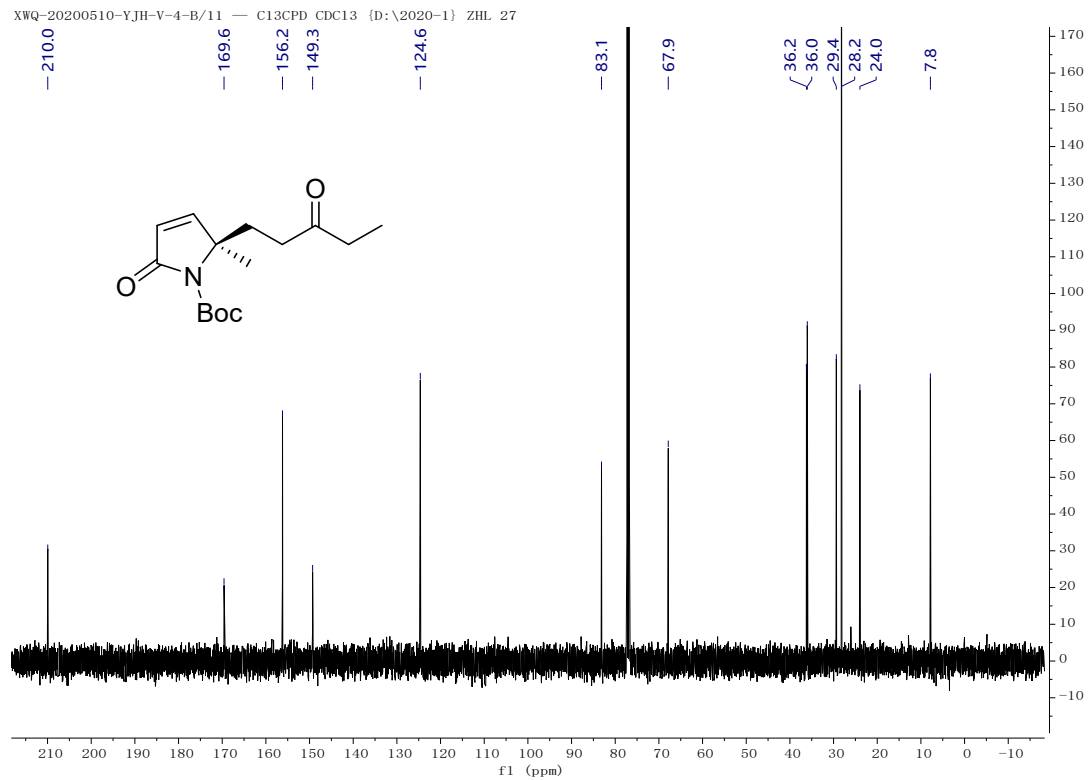

<sup>1</sup>H NMR spectrum of compound **15j** (500 MHz, Chloroform-*d*)

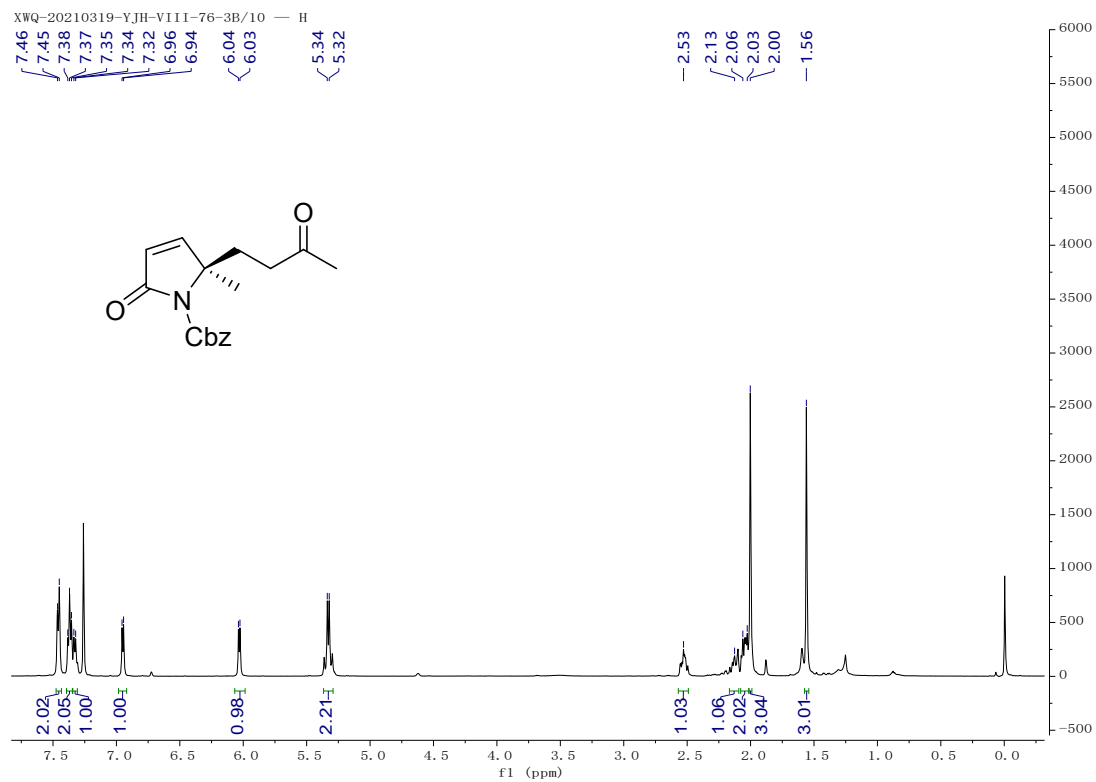

<sup>13</sup>C NMR spectrum of compound **15j** (126 MHz, Chloroform-*d*)

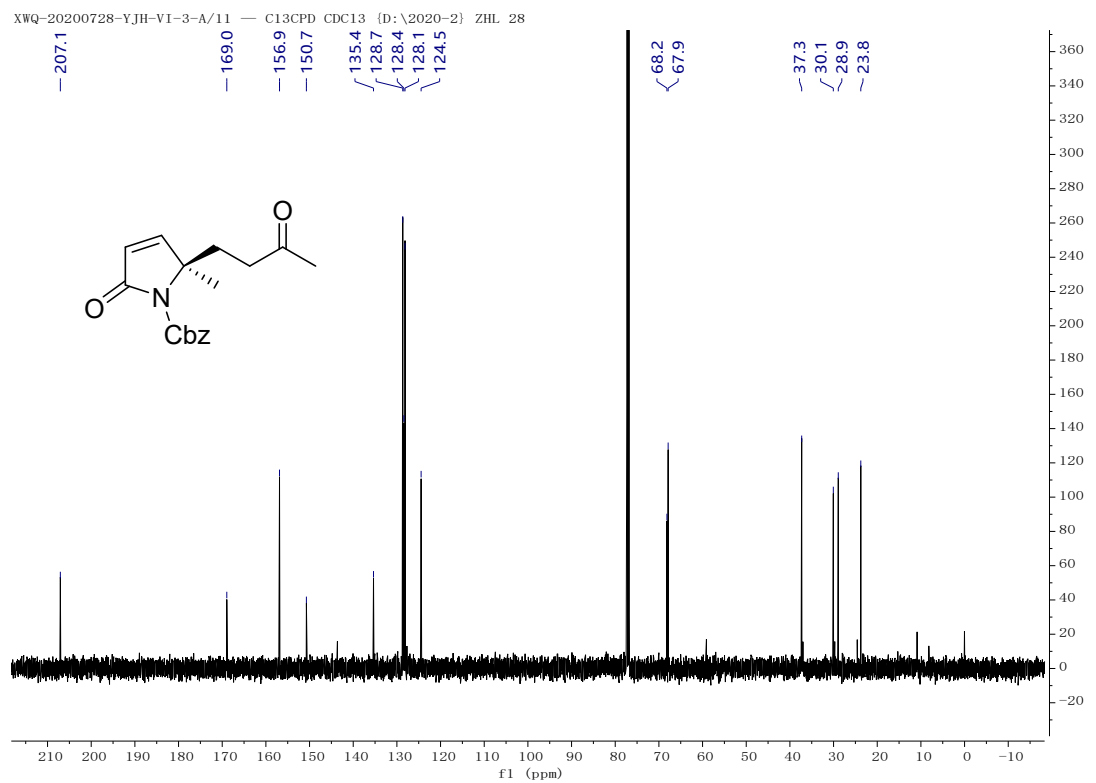

<sup>1</sup>H NMR spectrum of compound **15k** (500 MHz, Chloroform-*d*)

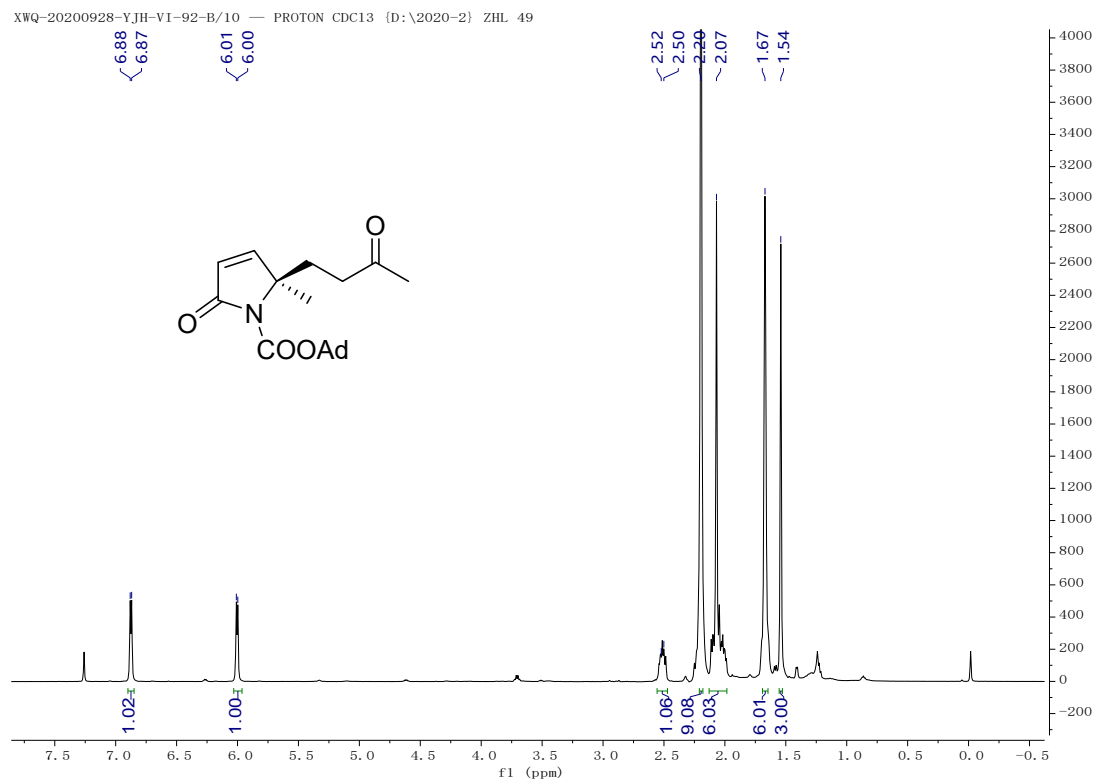

<sup>13</sup>C NMR spectrum of compound **15k** (126 MHz, Chloroform-*d*)

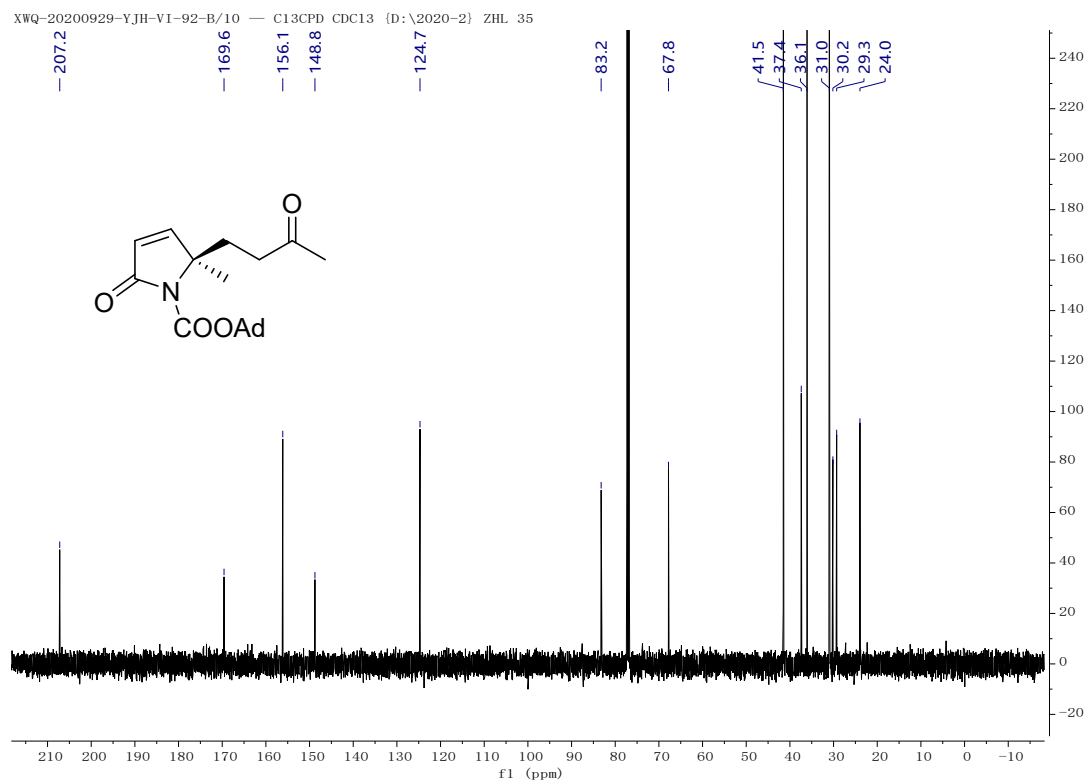

<sup>1</sup>H NMR spectrum of compound **17a** (500 MHz, Chloroform-*d*)

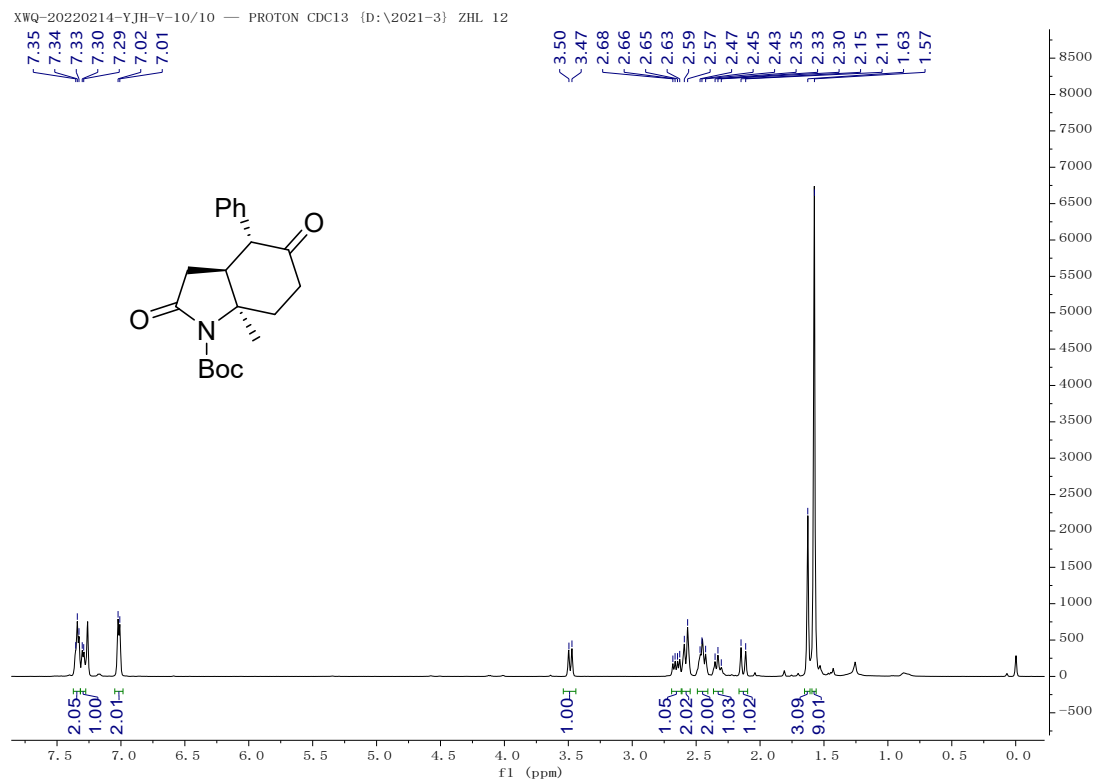

<sup>13</sup>C NMR spectrum of compound **17a** (126 MHz, Chloroform-*d*)

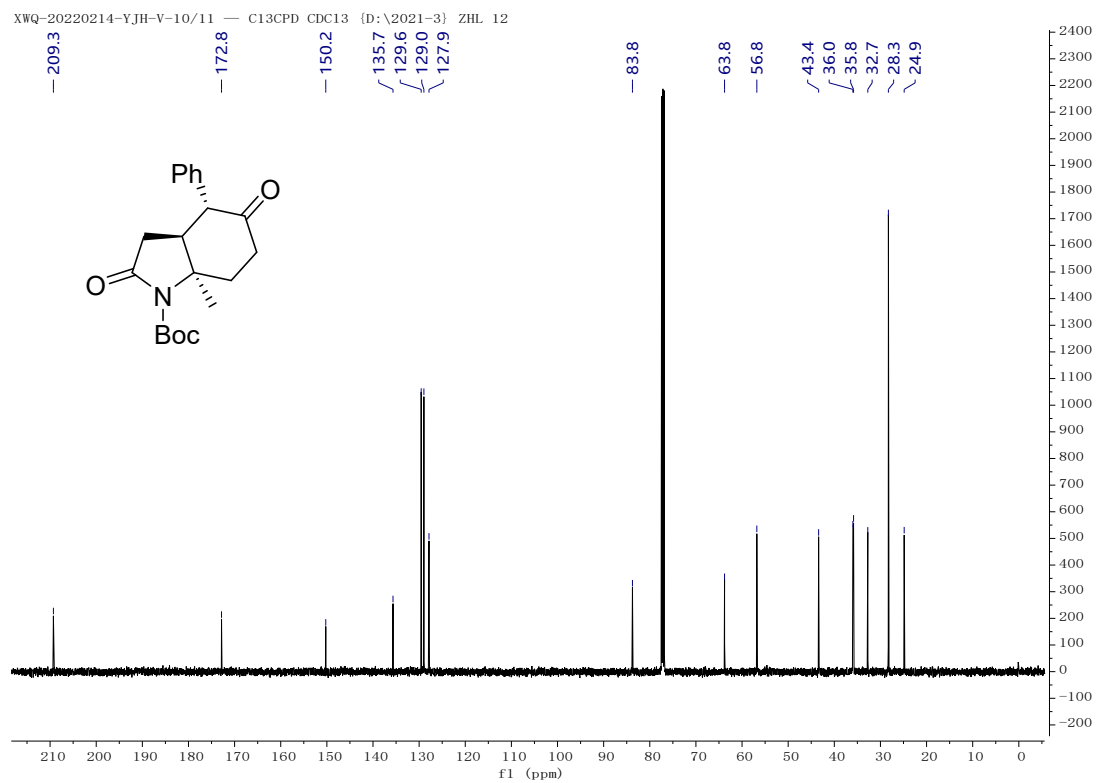

<sup>1</sup>H NMR spectrum of compound **17b** (500 MHz, Chloroform-*d*)

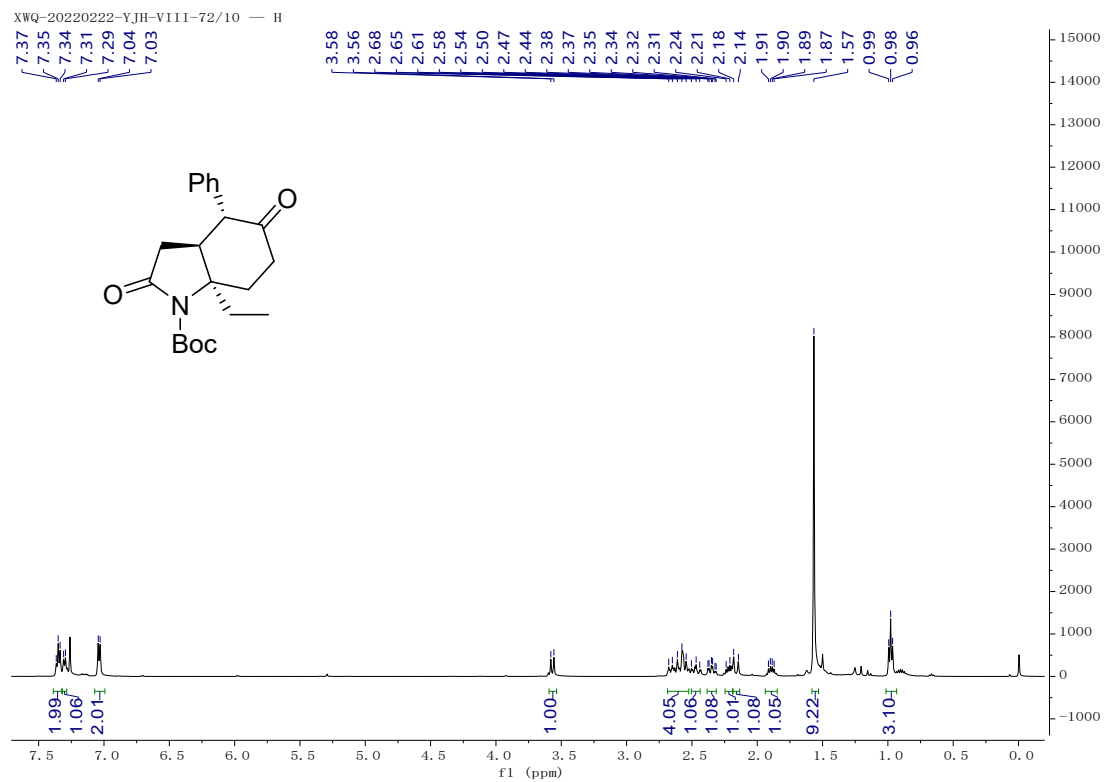

<sup>13</sup>C NMR spectrum of compound **17b** (126 MHz, Chloroform-*d*)

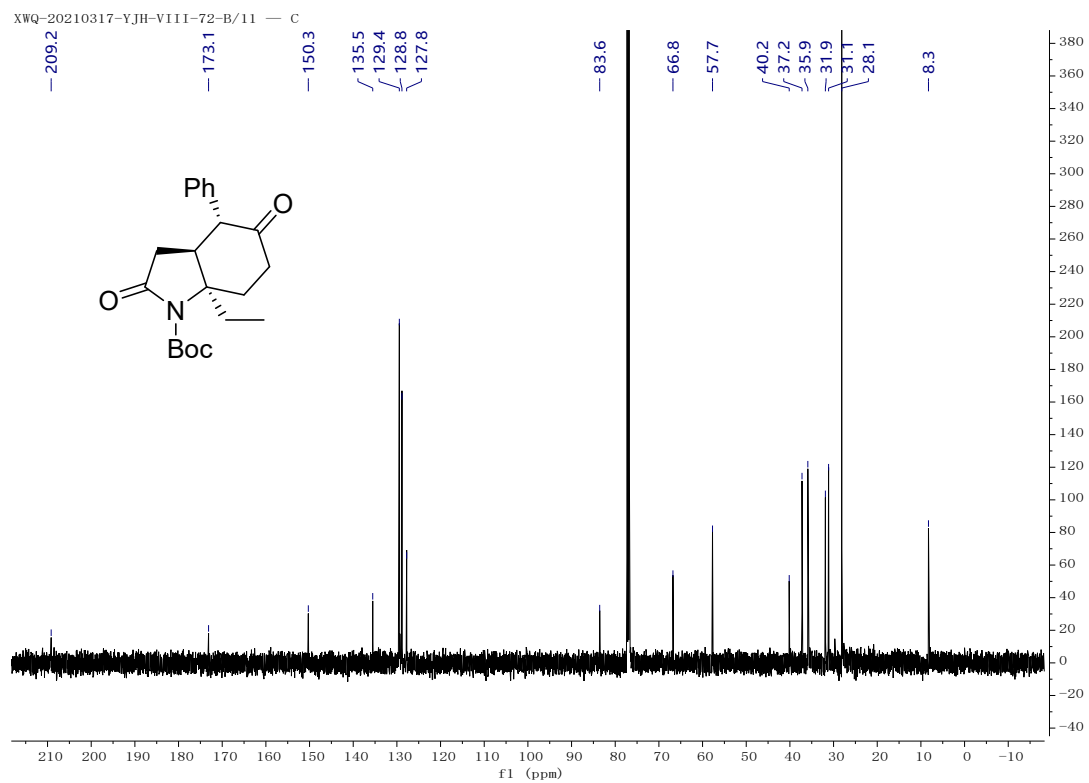

<sup>1</sup>H NMR spectrum of compound **17c** (500 MHz, Chloroform-*d*)

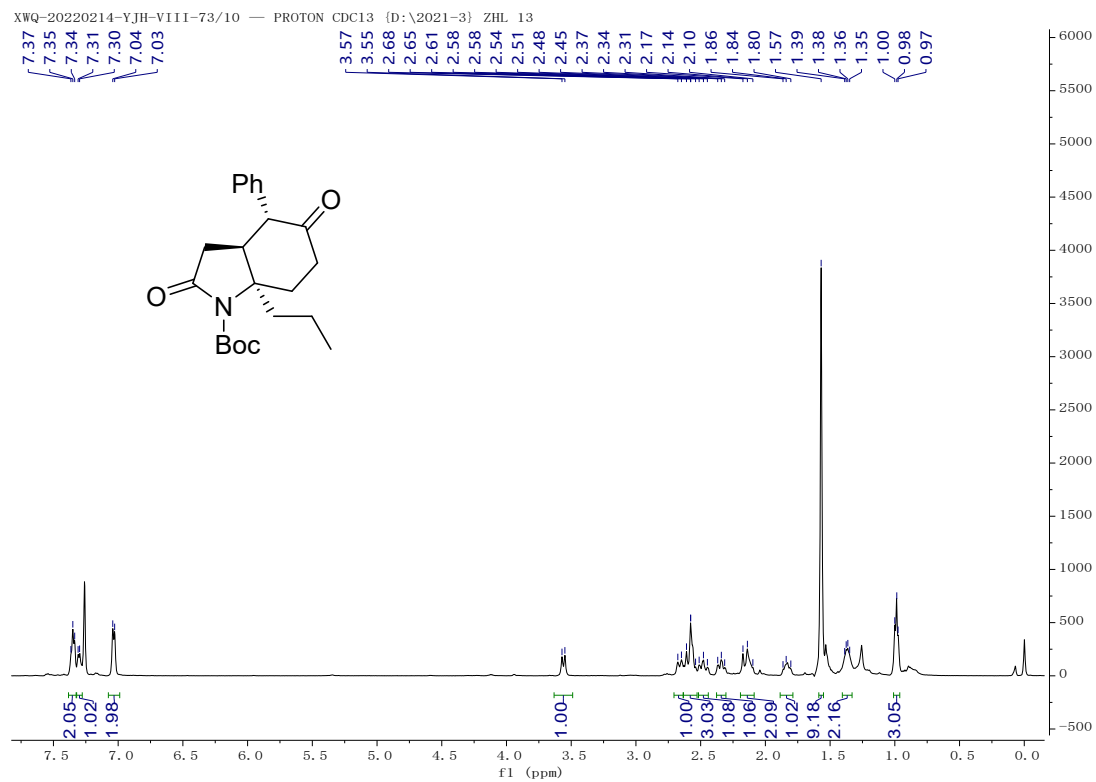

<sup>13</sup>C NMR spectrum of compound **17c** (126 MHz, Chloroform-*d*)

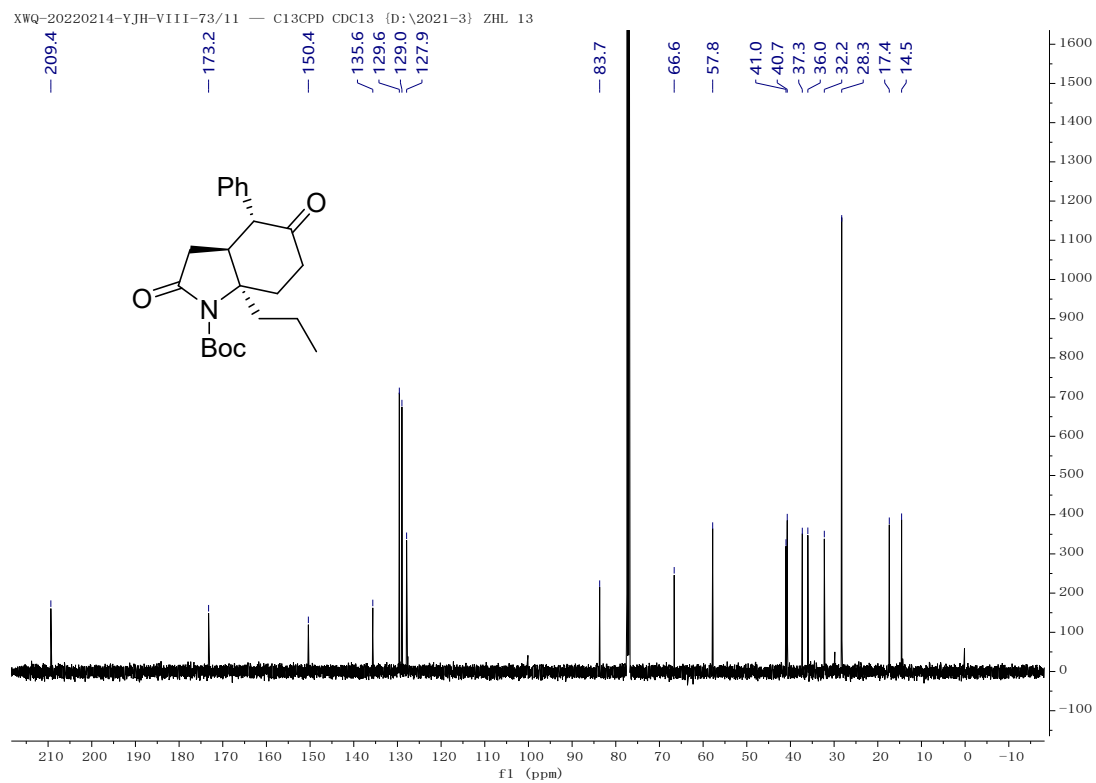

<sup>1</sup>H NMR spectrum of compound **17d** (500 MHz, Chloroform-*d*)

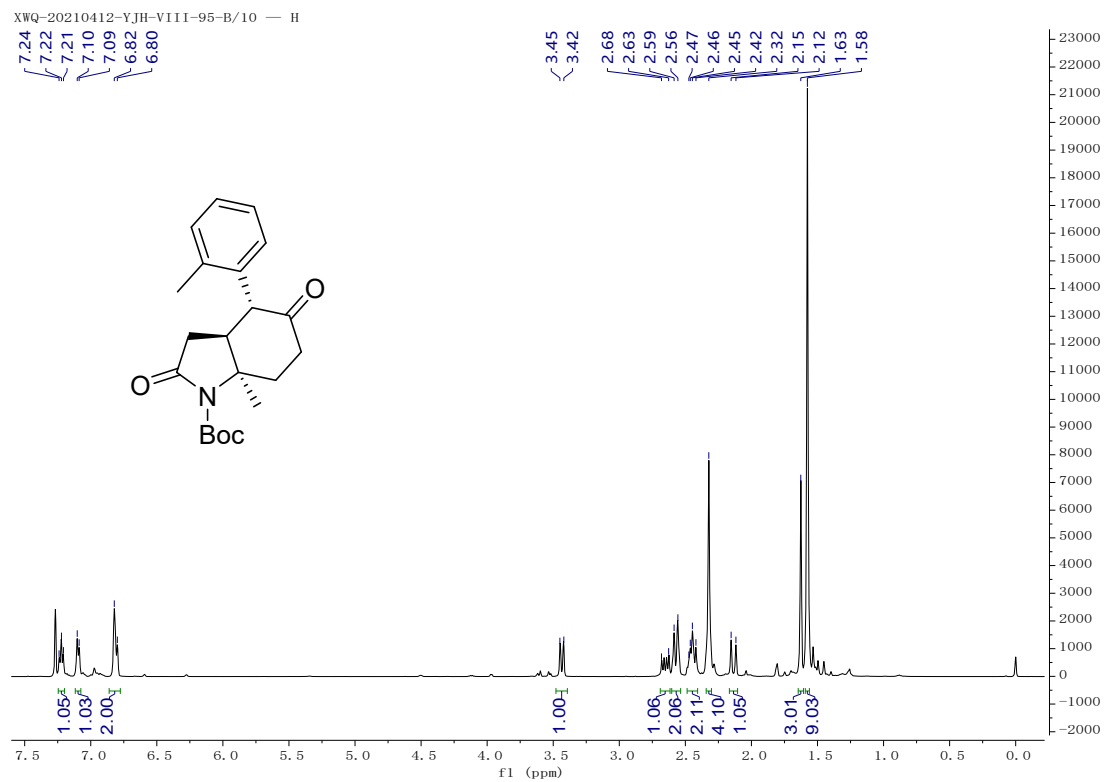

<sup>13</sup>C NMR spectrum of compound **17d** (126 MHz, Chloroform-*d*)

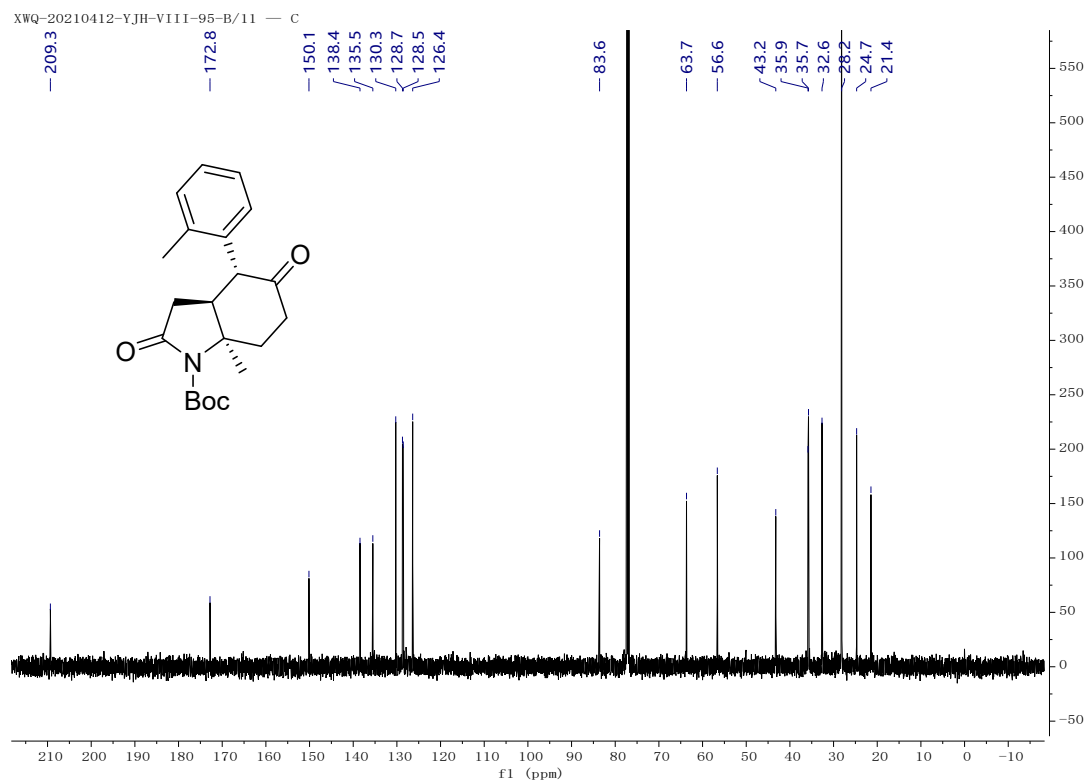



<sup>1</sup>H NMR spectrum of compound 17e (500 MHz, Chloroform-*d*)

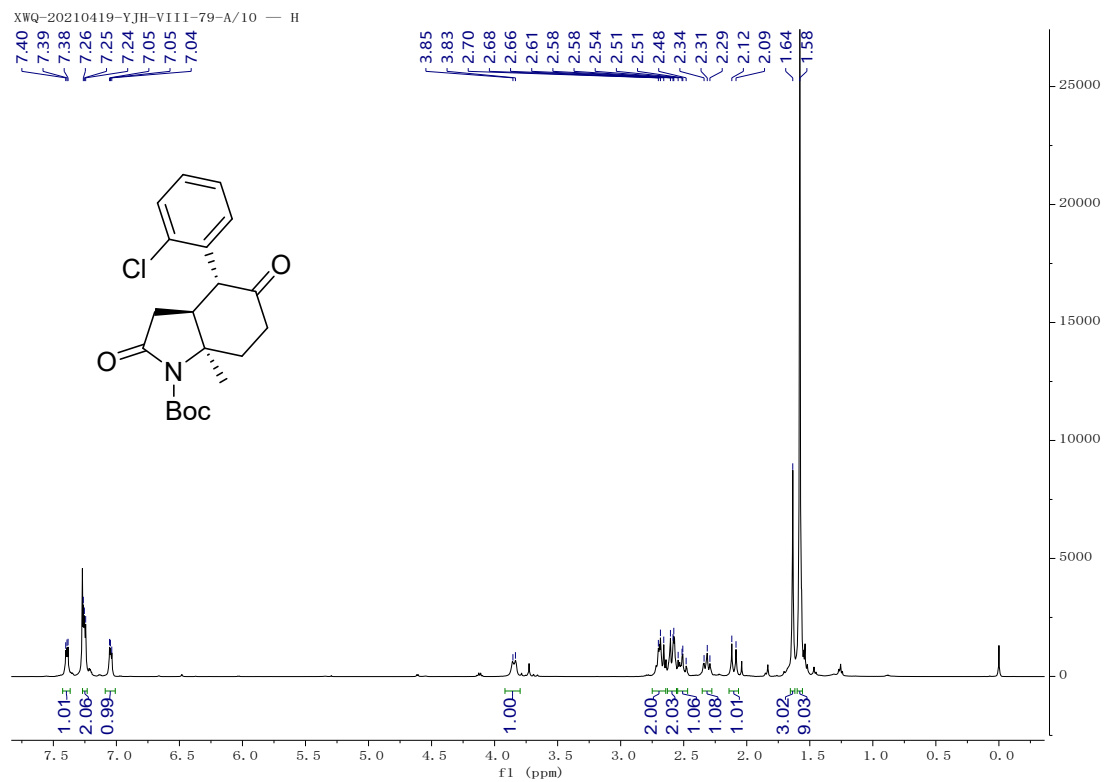

<sup>13</sup>C NMR spectrum of compound 17e (126 MHz, Chloroform-*d*)

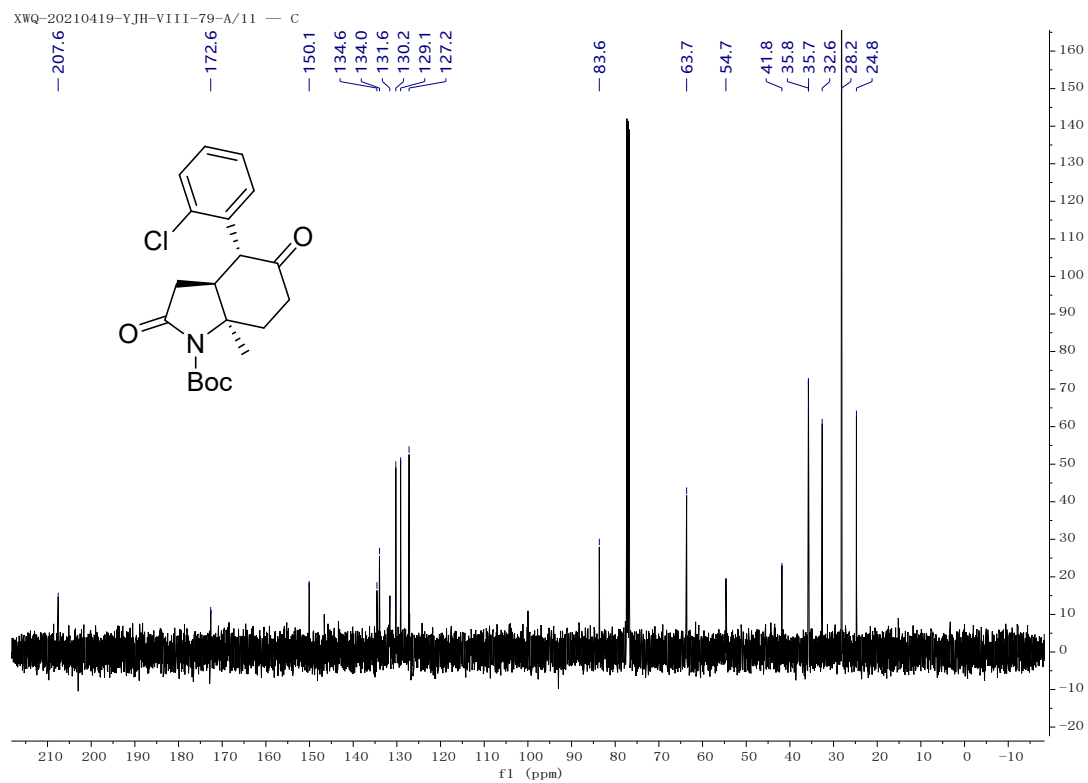

<sup>1</sup>H NMR spectrum of compound **17f** (500 MHz, Chloroform-*d*)

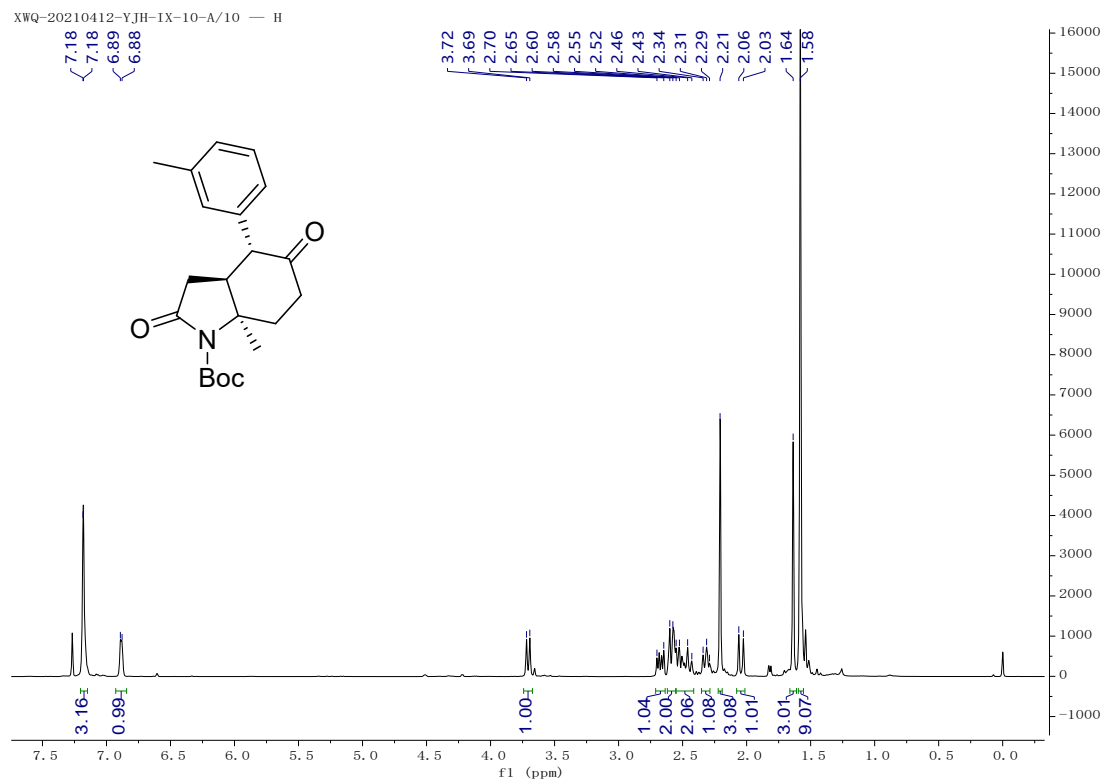

<sup>13</sup>C NMR spectrum of compound **17f** (126 MHz, Chloroform-*d*)

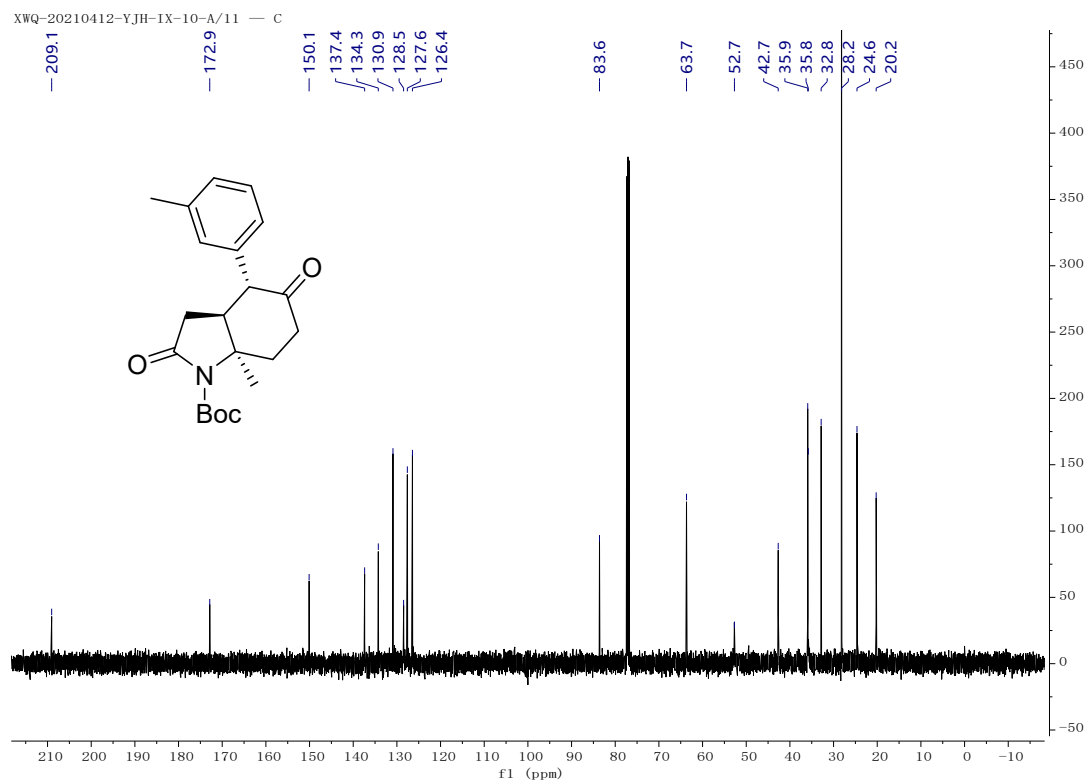

<sup>1</sup>H NMR spectrum of compound **17g** (500 MHz, Chloroform-*d*)

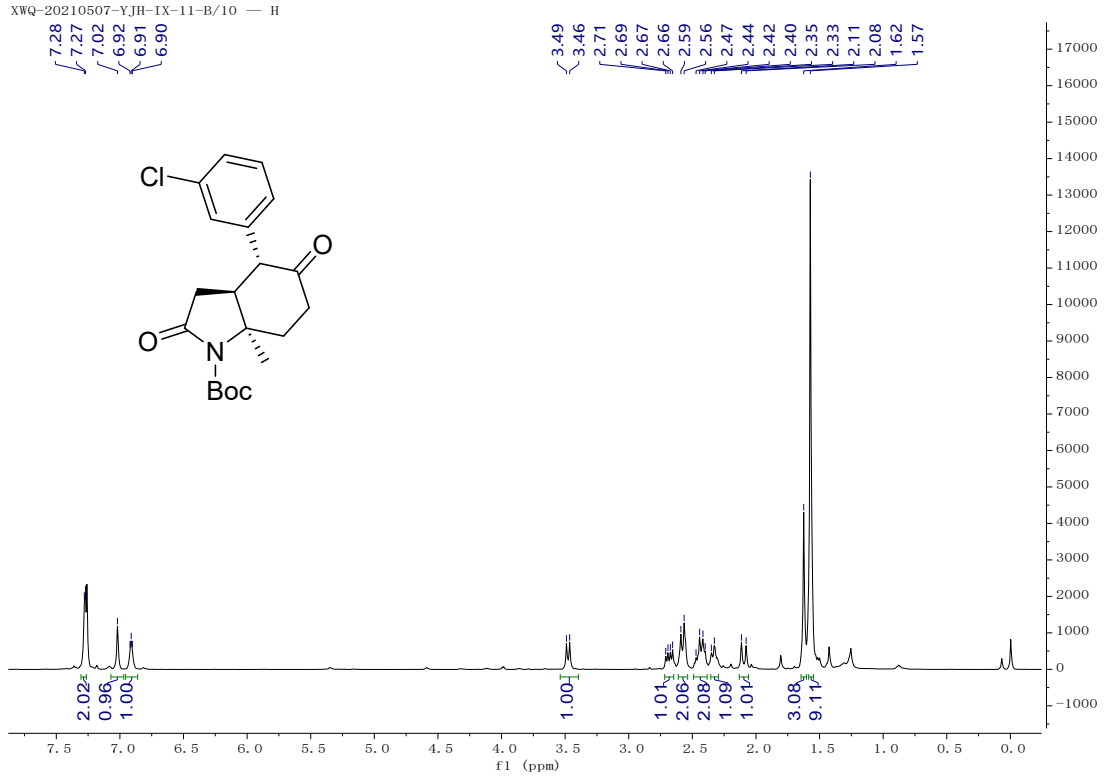

<sup>13</sup>C NMR spectrum of compound **17g** (126 MHz, Chloroform-*d*)

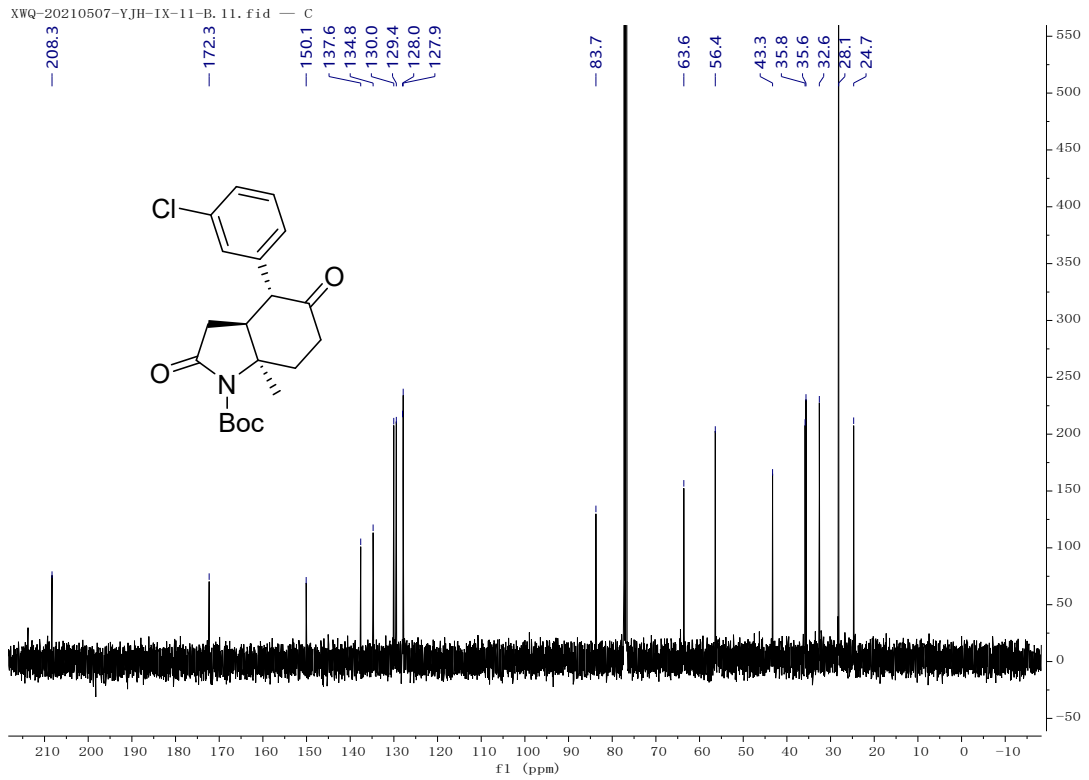

<sup>1</sup>H NMR spectrum of compound **17h** (500 MHz, Chloroform-*d*)

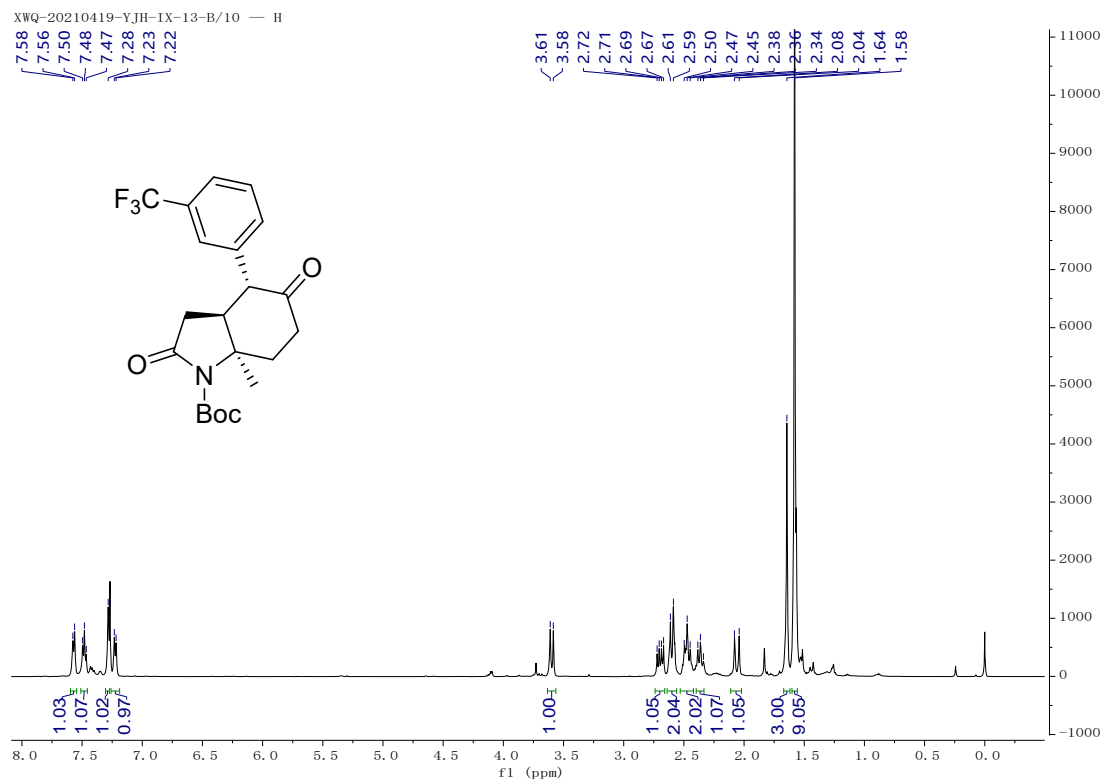

<sup>13</sup>C NMR spectrum of compound **17h** (126 MHz, Chloroform-*d*)

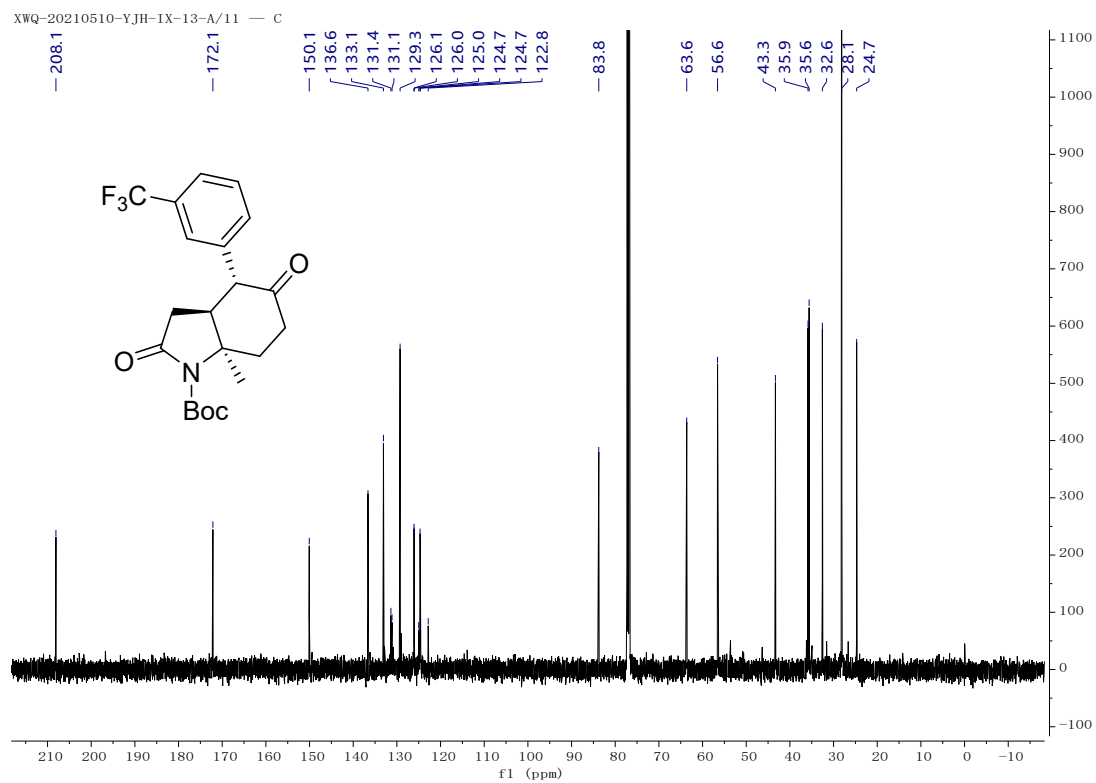

<sup>1</sup>H NMR spectrum of compound **17i** (500 MHz, Chloroform-*d*)

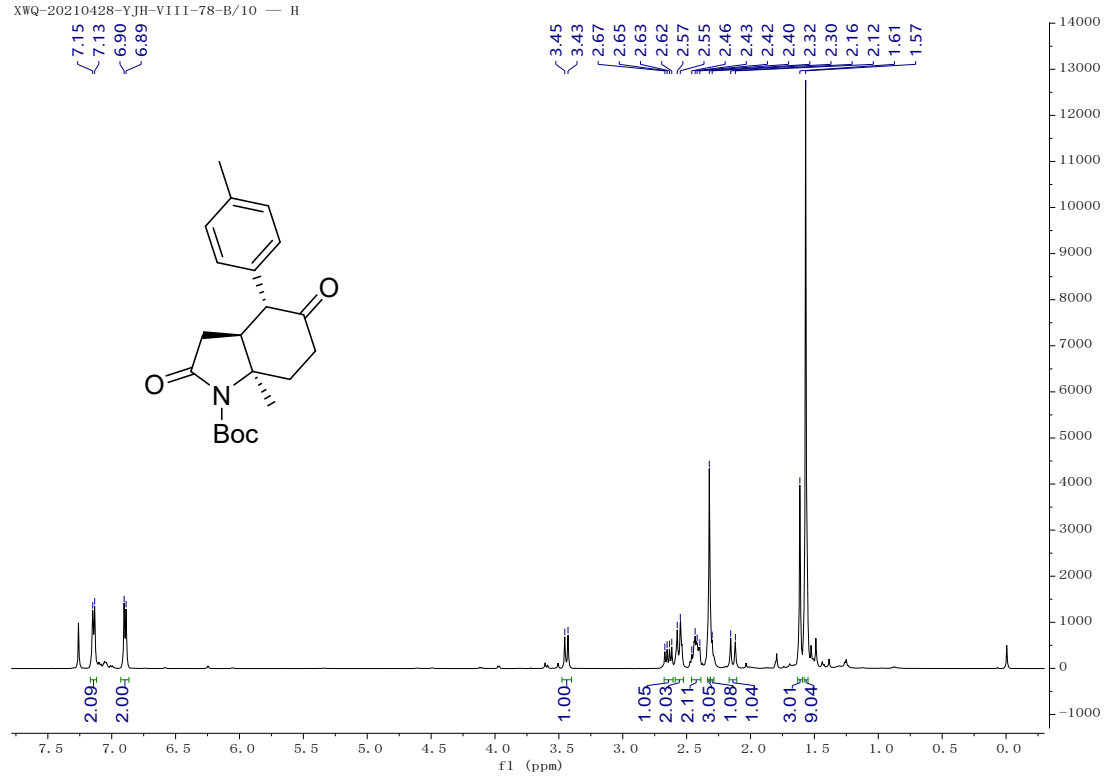

<sup>13</sup>C NMR spectrum of compound **17i** (126 MHz, Chloroform-*d*)

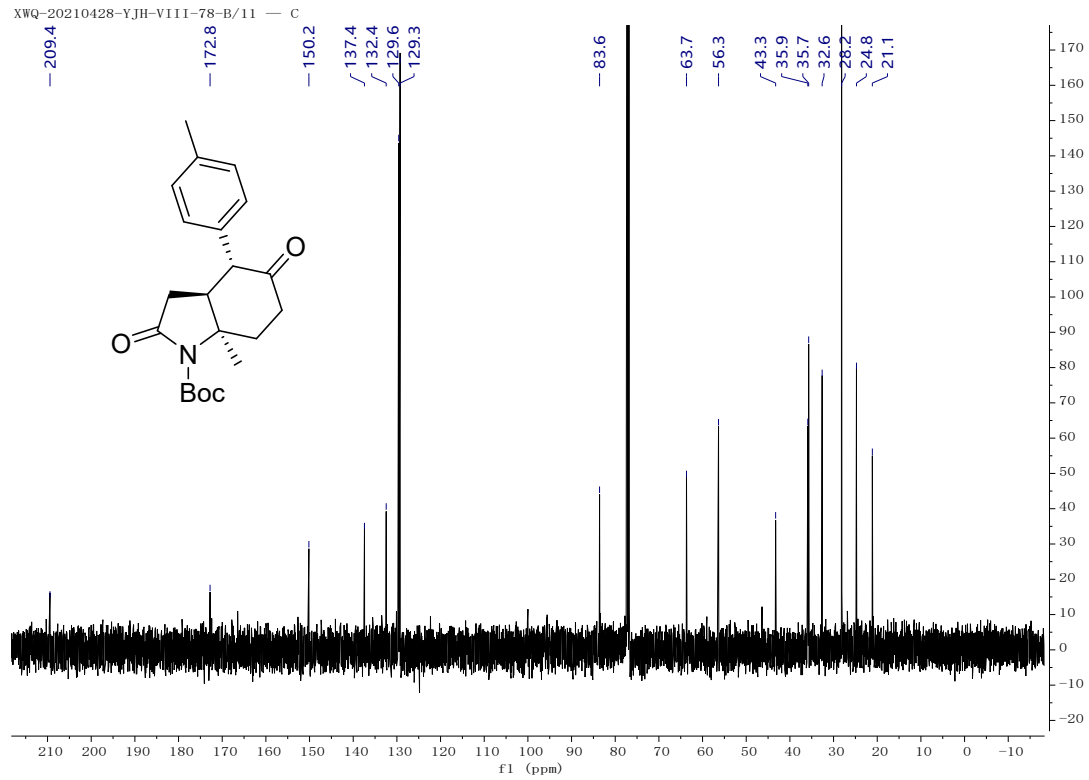

<sup>1</sup>H NMR spectrum of compound **17j** (500 MHz, Chloroform-*d*)

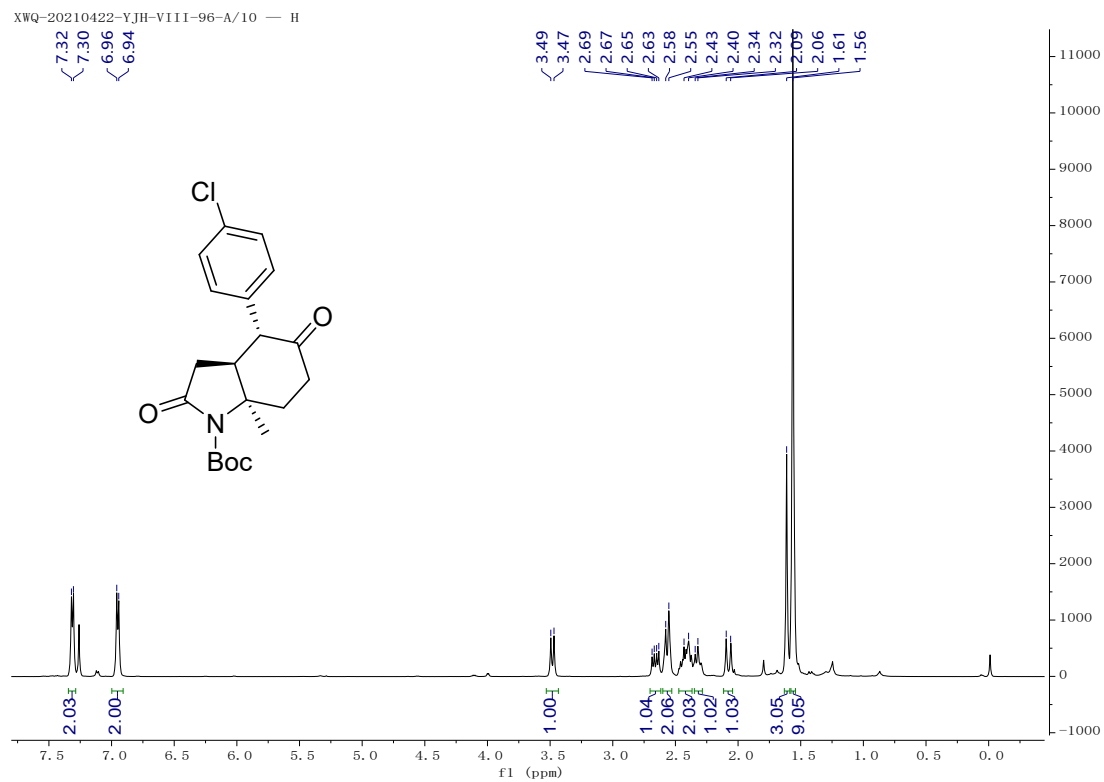

<sup>13</sup>C NMR spectrum of compound **17j** (126 MHz, Chloroform-*d*)

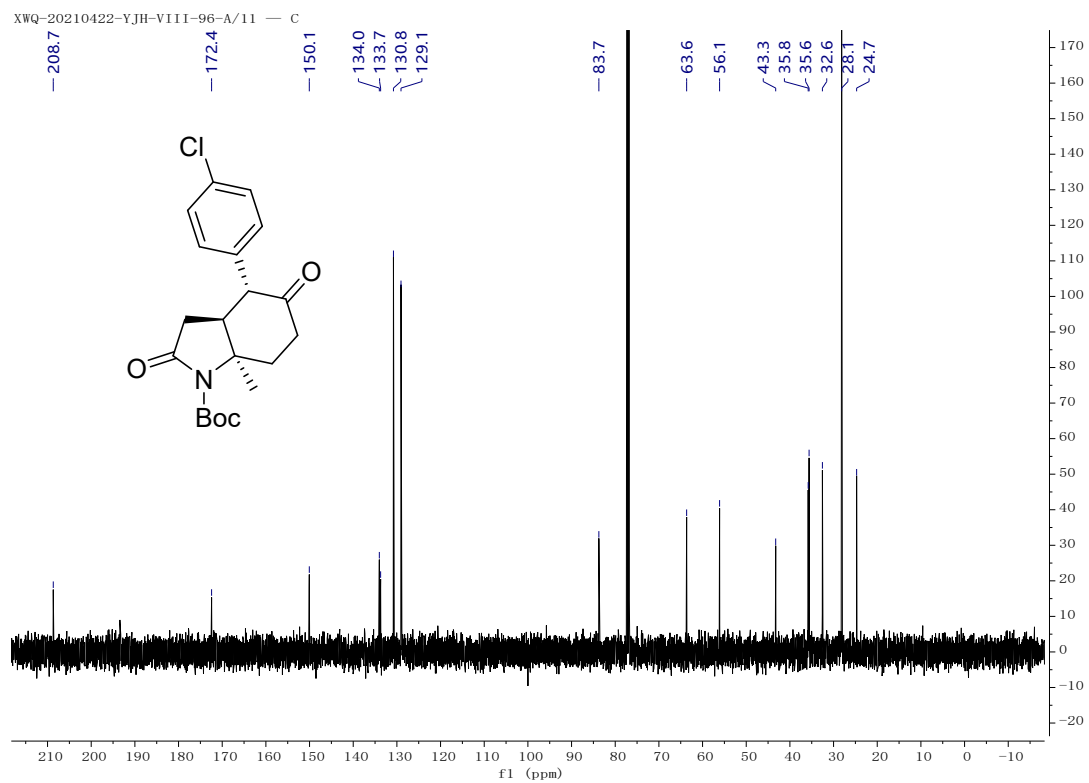

<sup>1</sup>H NMR spectrum of compound **17k** (500 MHz, Chloroform-*d*)

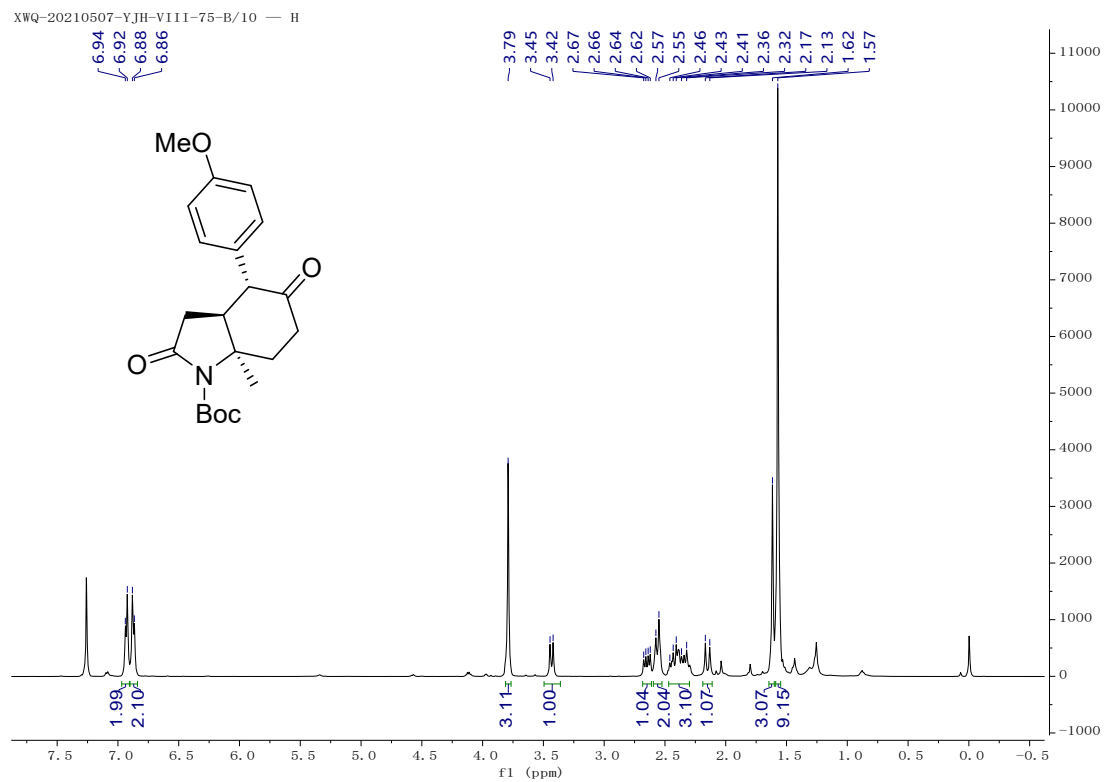

<sup>13</sup>C NMR spectrum of compound **17k** (126 MHz, Chloroform-*d*)

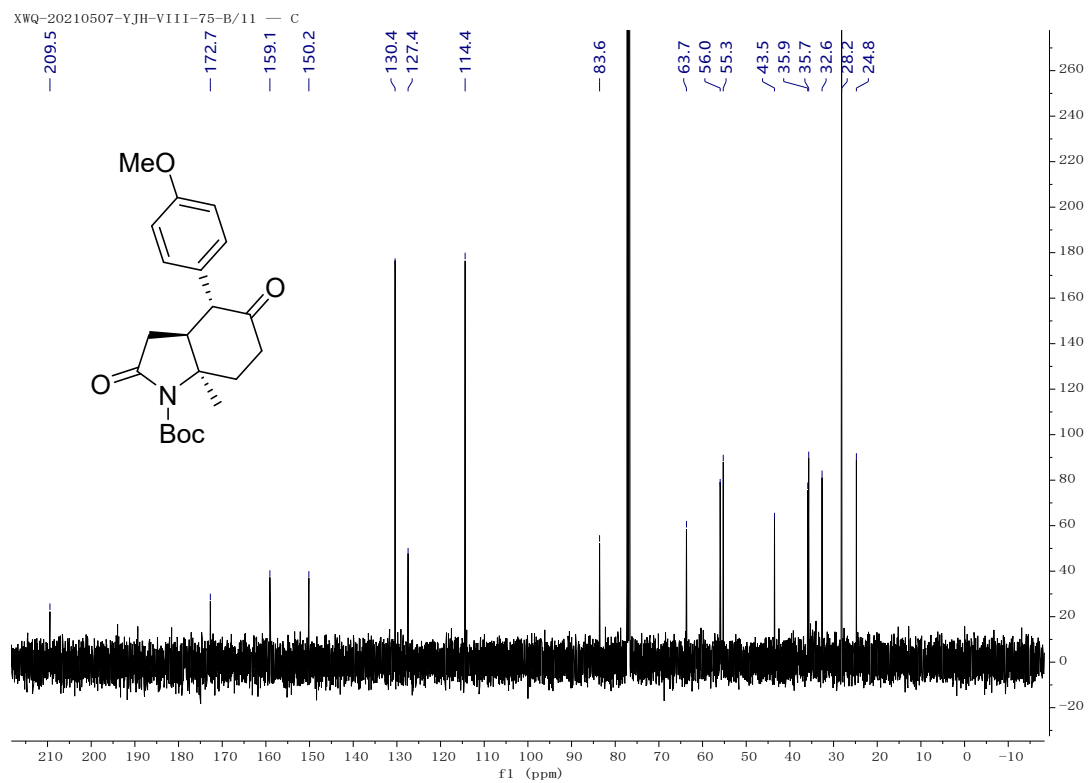

## 6. HPLC Data

HPLC data of compound **15a**  
(Chiralpak OD-H, Hexane/*i*-PrOH = 85/15, 0.7 mL/min, 214 nm)

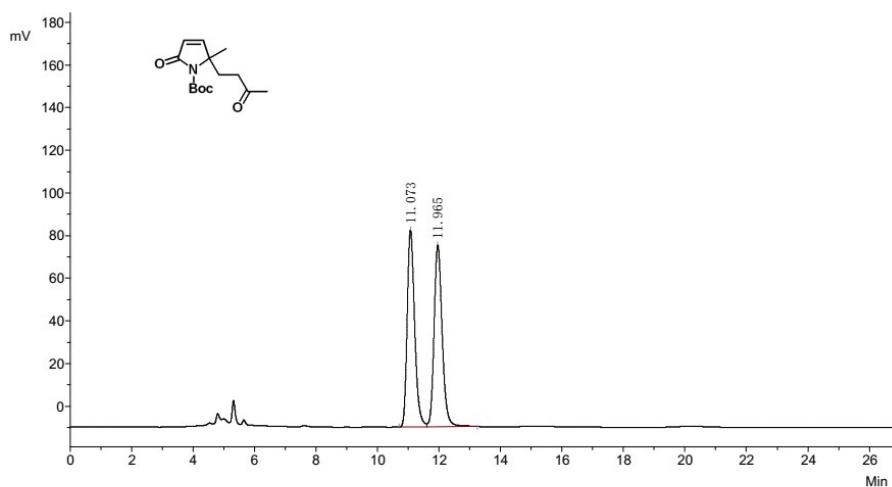

| No.   | R. Time | PeakHeight | PeakArea  | PerCent  | Conc     |
|-------|---------|------------|-----------|----------|----------|
| 1     | 11.073  | 92349.5    | 1557412.1 | 50.0066  | 50.0066  |
| 2     | 11.965  | 85179.7    | 1557004.0 | 49.9934  | 49.9934  |
| Total |         | 177529.2   | 3114416.1 | 100.0000 | 100.0000 |

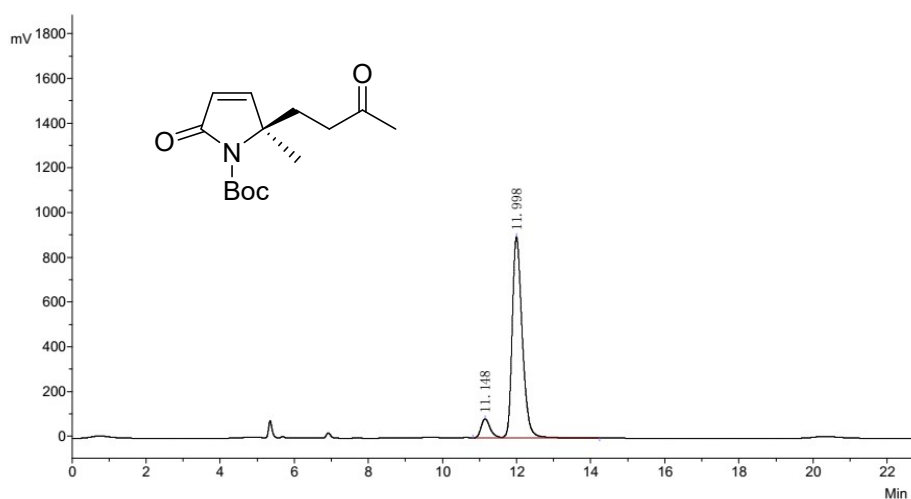

| No.   | R. Time | PeakHeight | PeakArea   | PerCent  | Conc     |
|-------|---------|------------|------------|----------|----------|
| 1     | 11.148  | 84924.0    | 1442450.3  | 7.8638   | 7.8638   |
| 2     | 11.998  | 898507.6   | 16900464.9 | 92.1362  | 92.1362  |
| Total |         | 983431.6   | 18342915.2 | 100.0000 | 100.0000 |



HPLC data of compound **15b**  
 (Chiralpak OD-H, Hexane/*i*-PrOH = 90/10, 0.4 mL/min, 214 nm)

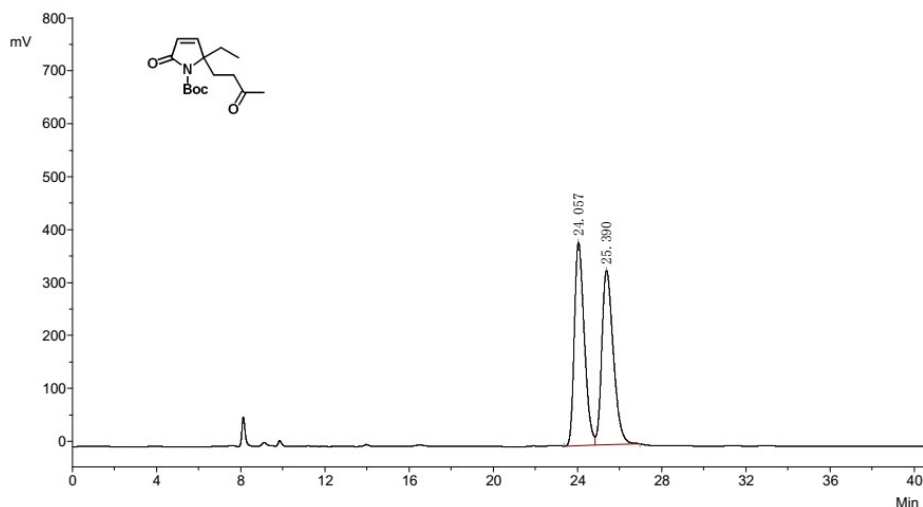

| No.          | R. Time | PeakHeight | PeakArea   | PerCent  | Conc     |
|--------------|---------|------------|------------|----------|----------|
| 1            | 24.057  | 383633.0   | 12588310.7 | 50.0823  | 50.0823  |
| 2            | 25.390  | 329550.3   | 12546937.7 | 49.9177  | 49.9177  |
| <b>Total</b> |         | 713183.3   | 25135248.4 | 100.0000 | 100.0000 |

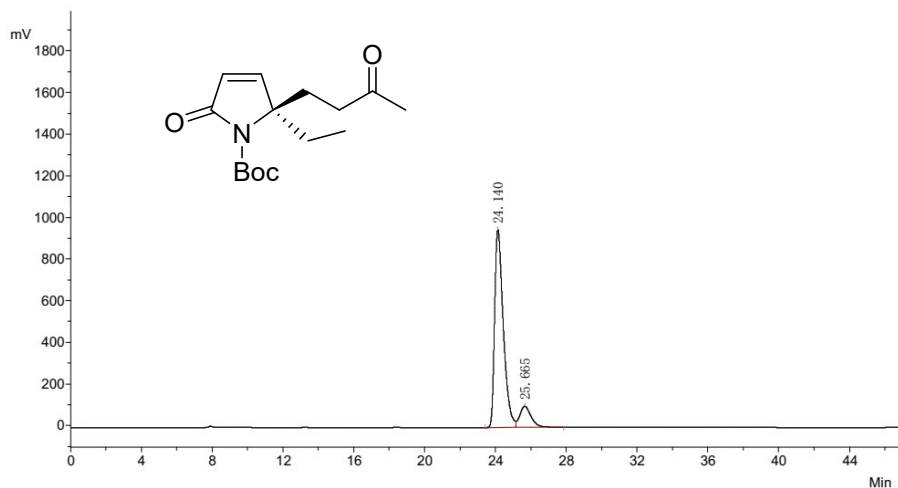

| No.          | R. Time | PeakHeight | PeakArea   | PerCent  | Conc     |
|--------------|---------|------------|------------|----------|----------|
| 1            | 24.140  | 951362.8   | 32335220.9 | 87.4916  | 87.4916  |
| 2            | 25.665  | 101759.7   | 4622882.1  | 12.5084  | 12.5084  |
| <b>Total</b> |         | 1053122.4  | 36958103.0 | 100.0000 | 100.0000 |

HPLC data of compound **15c**  
 (Chiralpak OD-H, Hexane/*i*-PrOH = 90/10, 0.6 mL/min, 214 nm)

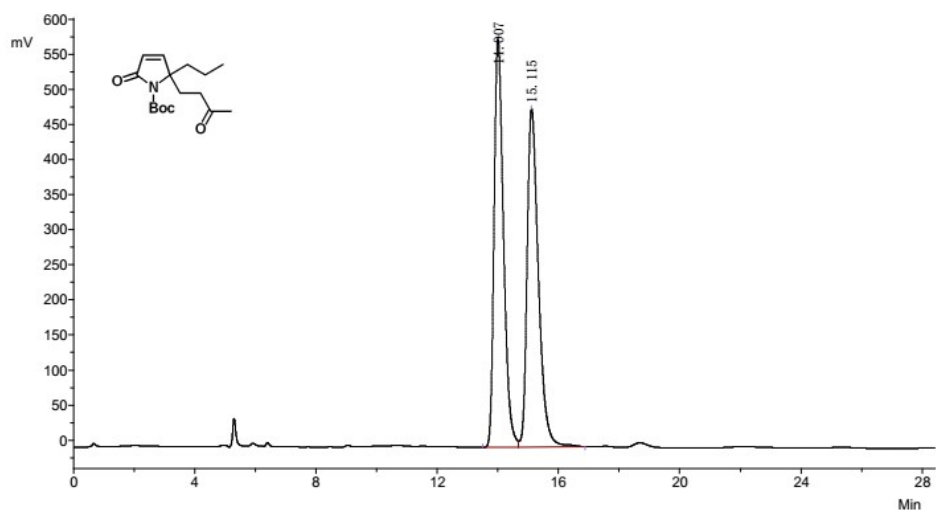

| No.          | R. Time | PeakHeight       | PeakArea          | PerCent         | Conc            |
|--------------|---------|------------------|-------------------|-----------------|-----------------|
| 1            | 14.007  | 581937.7         | 12556589.6        | 50.1555         | 50.1555         |
| 2            | 15.115  | 482020.9         | 12478710.5        | 49.8445         | 49.8445         |
| <b>Total</b> |         | <b>1063958.6</b> | <b>25035300.1</b> | <b>100.0000</b> | <b>100.0000</b> |

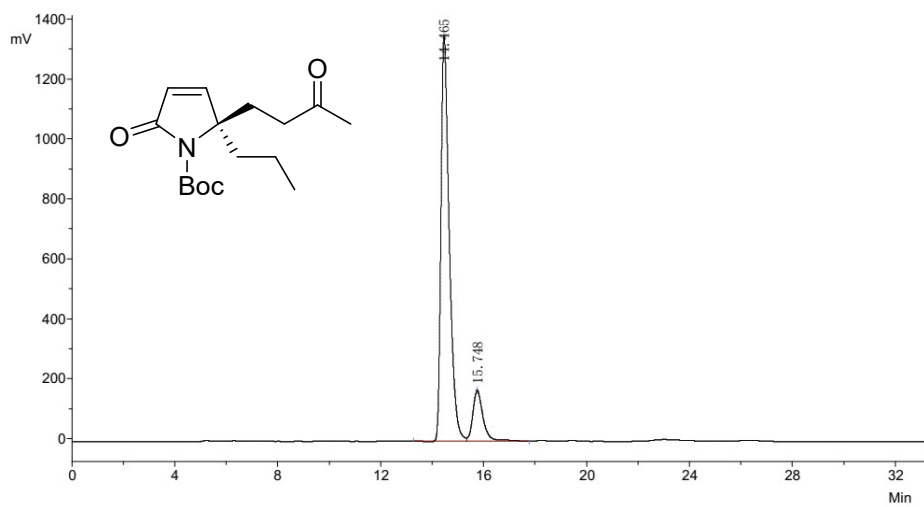

| No.          | R. Time | PeakHeight       | PeakArea          | PerCent         | Conc            |
|--------------|---------|------------------|-------------------|-----------------|-----------------|
| 1            | 14.465  | 1352307.6        | 30155970.1        | 86.4906         | 86.4906         |
| 2            | 15.748  | 171866.9         | 4710192.0         | 13.5094         | 13.5094         |
| <b>Total</b> |         | <b>1524174.4</b> | <b>34866162.0</b> | <b>100.0000</b> | <b>100.0000</b> |

HPLC data of compound **15d**  
 (Chiralpak AD-H, Hexane/*i*-PrOH/MeOH = 95/5/5, 0.7 mL/min, 214 nm)

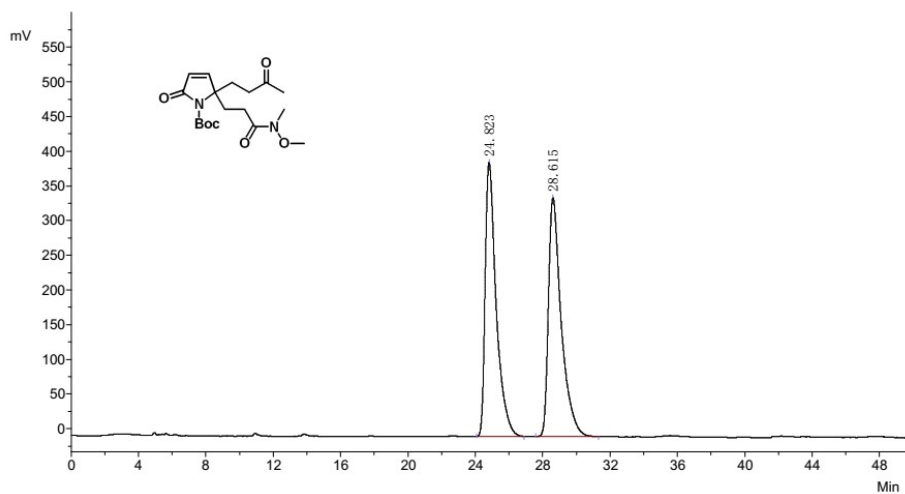

| No.          | R. Time | PeakHeight      | PeakArea          | PerCent         | Conc            |
|--------------|---------|-----------------|-------------------|-----------------|-----------------|
| 1            | 24.823  | 395280.2        | 17899970.2        | 49.7147         | 49.7147         |
| 2            | 28.615  | 343679.3        | 18105449.6        | 50.2853         | 50.2853         |
| <b>Total</b> |         | <b>738959.5</b> | <b>36005419.7</b> | <b>100.0000</b> | <b>100.0000</b> |

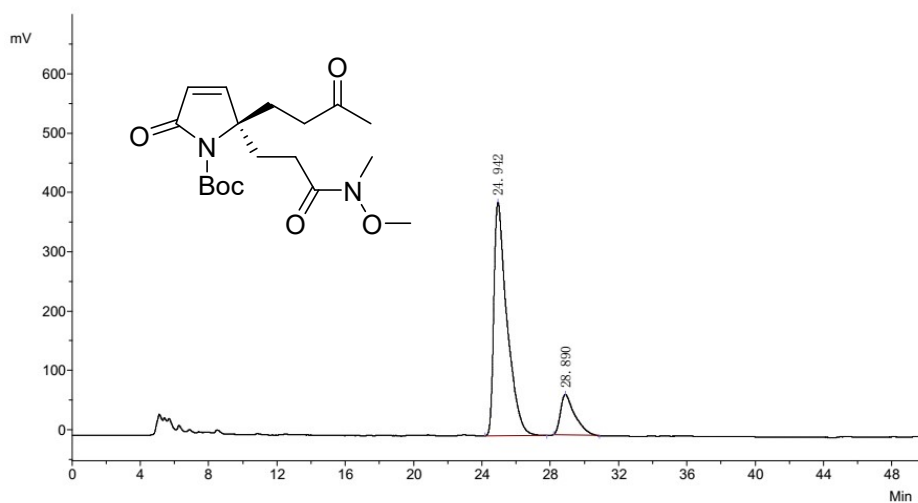

| No.          | R. Time | PeakHeight      | PeakArea          | PerCent         | Conc            |
|--------------|---------|-----------------|-------------------|-----------------|-----------------|
| 1            | 24.942  | 343875.9        | 20987880.2        | 84.0942         | 84.0942         |
| 2            | 28.890  | 68220.3         | 3969716.9         | 15.9058         | 15.9058         |
| <b>Total</b> |         | <b>412096.3</b> | <b>24957597.2</b> | <b>100.0000</b> | <b>100.0000</b> |

HPLC data of compound **15e**  
 (Chiralpak AD-H, Hexane/*i*-PrOH = 85/15, 0.7 mL/min, 214 nm)

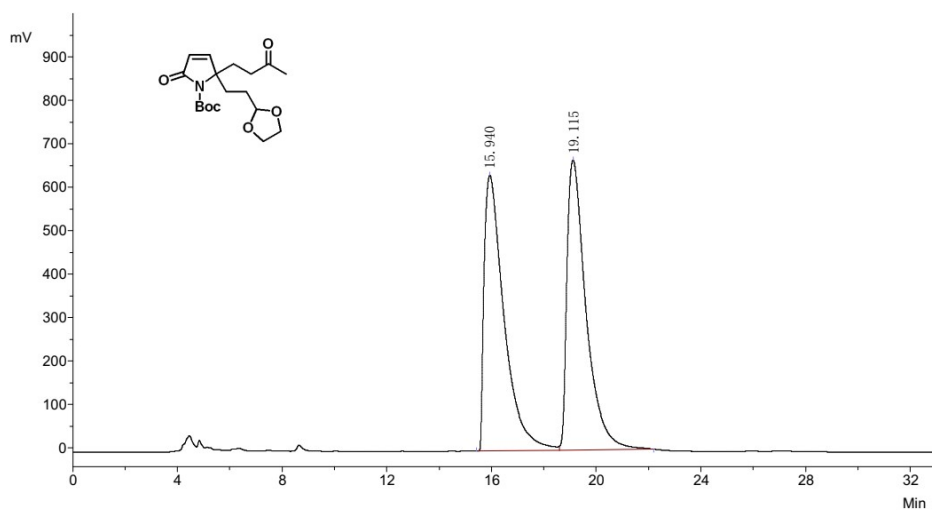

| No.          | R. Time | PeakHeight | PeakArea   | PerCent  | Conc     |
|--------------|---------|------------|------------|----------|----------|
| 1            | 15.940  | 634986.8   | 33523169.1 | 49.7752  | 49.7752  |
| 2            | 19.115  | 668109.2   | 33825912.5 | 50.2248  | 50.2248  |
| <b>Total</b> |         | 1303096.0  | 67349081.6 | 100.0000 | 100.0000 |

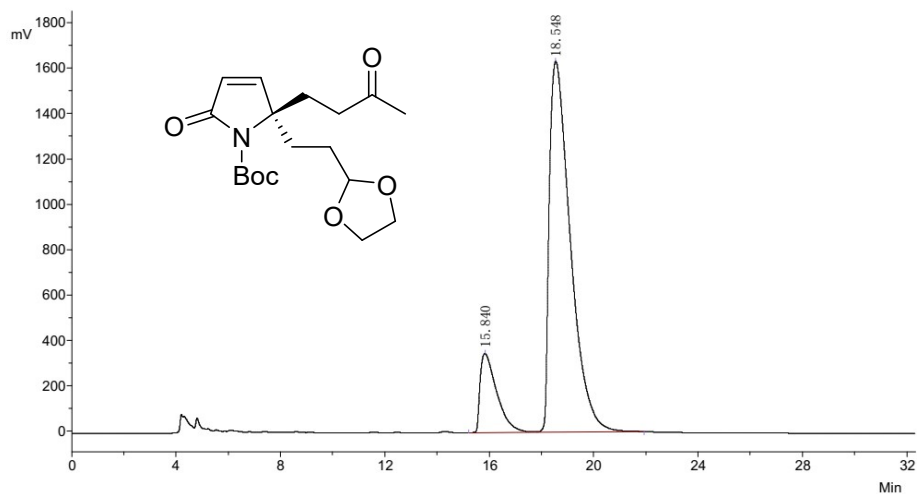

| No.          | R. Time | PeakHeight | PeakArea    | PerCent  | Conc     |
|--------------|---------|------------|-------------|----------|----------|
| 1            | 15.840  | 349887.6   | 15584830.3  | 14.5649  | 14.5649  |
| 2            | 18.548  | 1634019.8  | 91417477.2  | 85.4351  | 85.4351  |
| <b>Total</b> |         | 1983907.3  | 107002307.6 | 100.0000 | 100.0000 |

HPLC data of compound **15f**  
 (Chiralpak OD-H, Hexane/*i*-PrOH = 60/40, 0.7 mL/min, 214 nm)

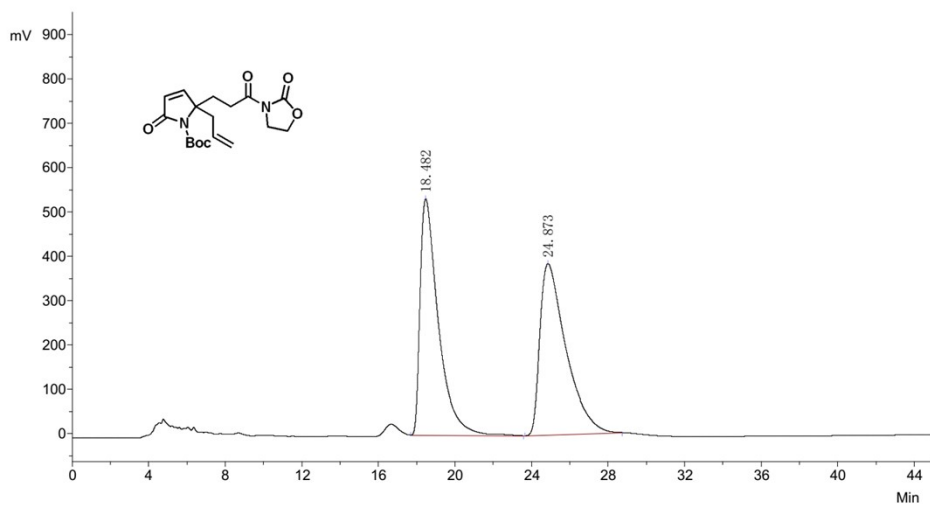

| No.   | R. Time | PeakHeight | PeakArea   | PerCent  | Conc     |
|-------|---------|------------|------------|----------|----------|
| 1     | 18.482  | 533211.1   | 35385340.9 | 49.2442  | 49.2442  |
| 2     | 24.873  | 386573.6   | 36471490.4 | 50.7558  | 50.7558  |
| Total |         | 919784.7   | 71856831.3 | 100.0000 | 100.0000 |

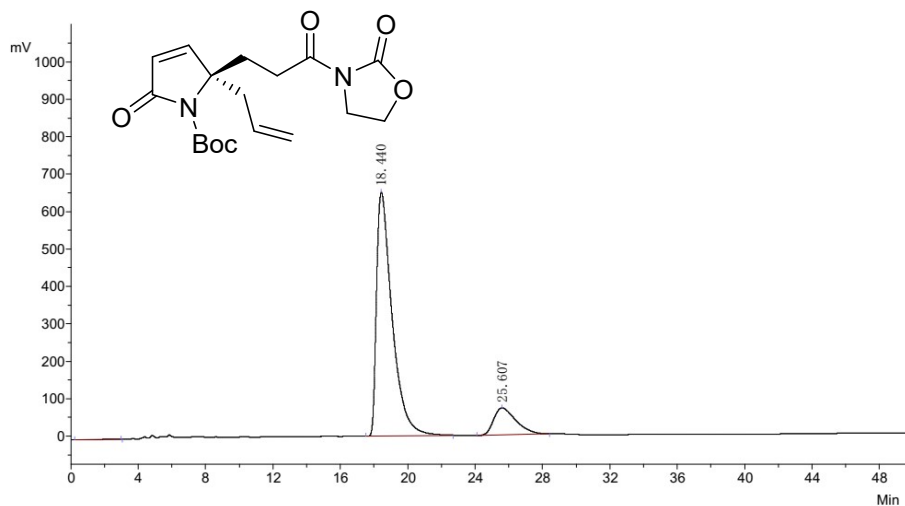

| No.   | R. Time | PeakHeight | PeakArea   | PerCent  | Conc     |
|-------|---------|------------|------------|----------|----------|
| 1     | 18.440  | 651941.7   | 41795722.2 | 86.2958  | 86.2958  |
| 2     | 25.607  | 71962.8    | 6637373.4  | 13.7042  | 13.7042  |
| Total |         | 723904.5   | 48433095.6 | 100.0000 | 100.0000 |

HPLC data of compound **15g**  
 (Chiralpak IC, Hexane/*i*-PrOH/MeOH = 70/20/10, 0.7 mL/min, 214 nm)

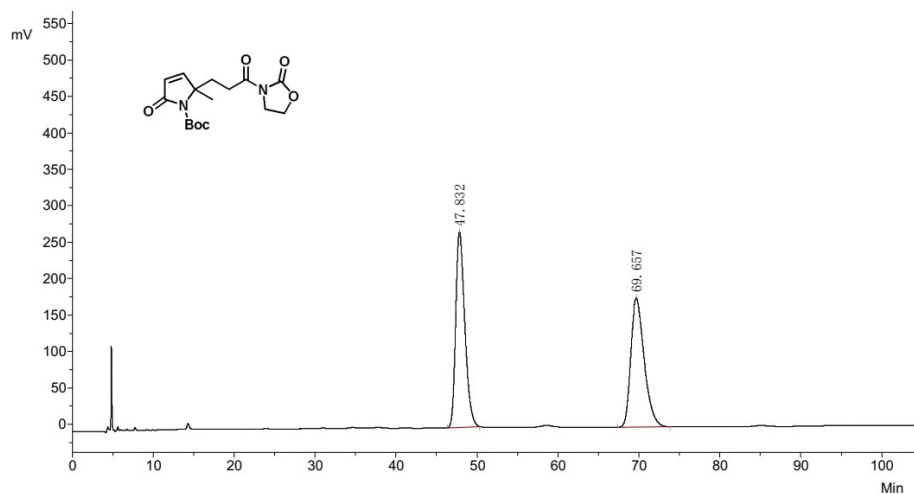

| No.   | R. Time | PeakHeight | PeakArea   | PerCent  | Conc     |
|-------|---------|------------|------------|----------|----------|
| 1     | 47.832  | 267761.6   | 20844289.5 | 50.6778  | 50.6778  |
| 2     | 69.657  | 176866.7   | 20286696.1 | 49.3222  | 49.3222  |
| Total |         | 444628.3   | 41130985.6 | 100.0000 | 100.0000 |

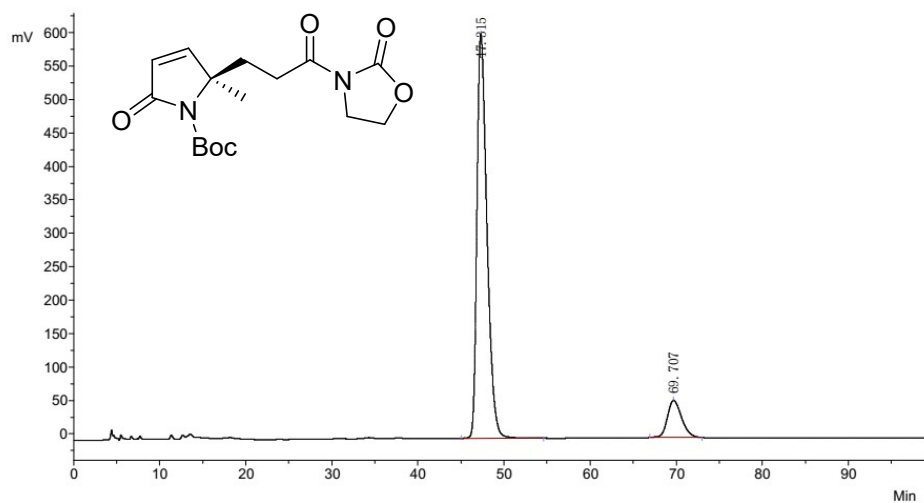

| No.   | R. Time | PeakHeight | PeakArea   | PerCent  | Conc     |
|-------|---------|------------|------------|----------|----------|
| 1     | 47.315  | 604800.2   | 48918545.6 | 88.4428  | 88.4428  |
| 2     | 69.707  | 55711.6    | 6392408.4  | 11.5572  | 11.5572  |
| Total |         | 660511.8   | 55310953.9 | 100.0000 | 100.0000 |

HPLC data of compound **15h1**  
 (Chiralpak IC, Hexane/*i*-PrOH = 85/15, 0.7 mL/min, 214 nm)

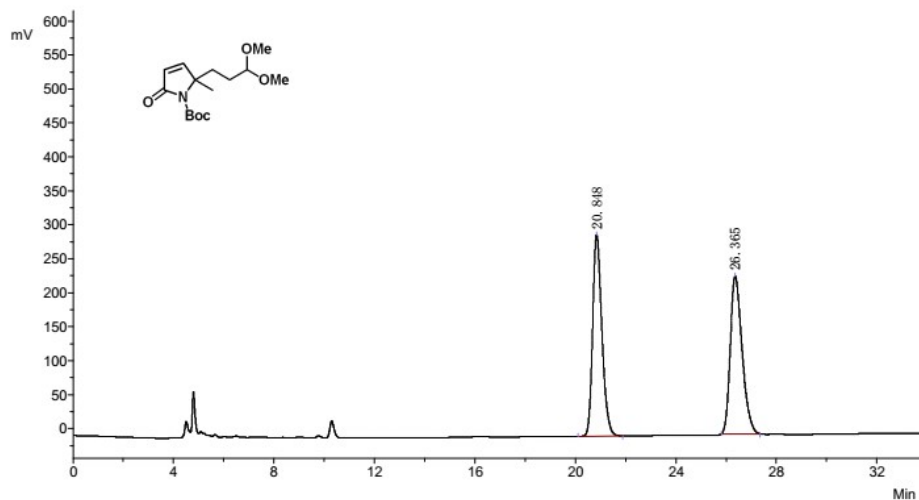

| No.   | R. Time | PeakHeight | PeakArea   | PerCent  | Conc     |
|-------|---------|------------|------------|----------|----------|
| 1     | 20.848  | 296279.6   | 7580544.1  | 49.9986  | 49.9986  |
| 2     | 26.365  | 232447.2   | 7580982.7  | 50.0014  | 50.0014  |
| Total |         | 528726.9   | 15161526.8 | 100.0000 | 100.0000 |

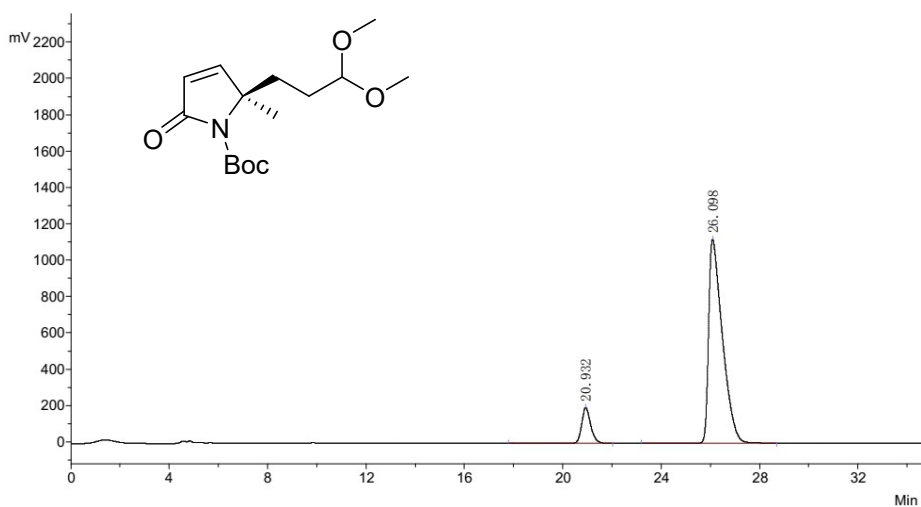

| No.   | R. Time | PeakHeight | PeakArea   | PerCent  | Conc     |
|-------|---------|------------|------------|----------|----------|
| 1     | 20.932  | 196207.1   | 4956944.8  | 10.2583  | 10.2583  |
| 2     | 26.098  | 1122417.3  | 43364548.6 | 89.7417  | 89.7417  |
| Total |         | 1318624.5  | 48321493.5 | 100.0000 | 100.0000 |

HPLC data of compound **15i**  
 (Chiralpak OD-H, Hexane/*i*-PrOH/MeOH = 95/5/5, 0.3 mL/min, 214 nm)

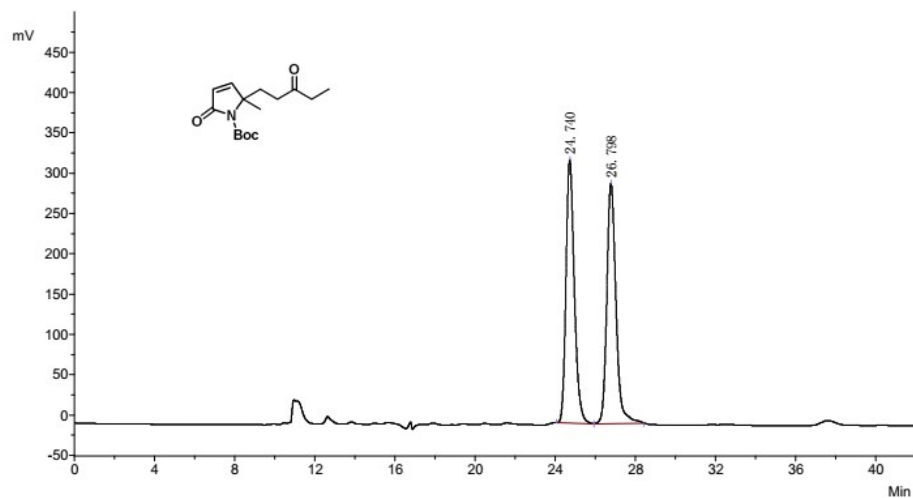

| No.          | R. Time | PeakHeight      | PeakArea          | PerCent         | Conc            |
|--------------|---------|-----------------|-------------------|-----------------|-----------------|
| 1            | 24.740  | 326543.0        | 9390811.2         | 49.9584         | 49.9584         |
| 2            | 26.798  | 298173.2        | 9406467.5         | 50.0416         | 50.0416         |
| <b>Total</b> |         | <b>624716.2</b> | <b>18797278.7</b> | <b>100.0000</b> | <b>100.0000</b> |

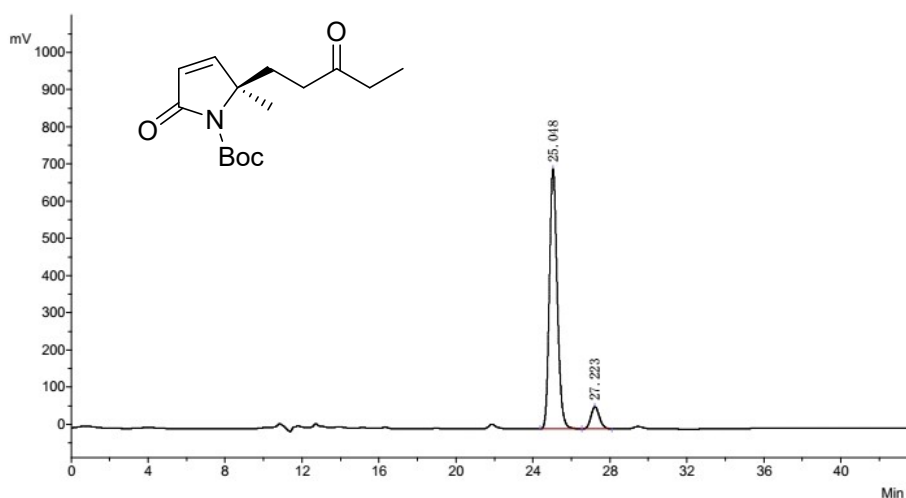

| No.          | R. Time | PeakHeight      | PeakArea          | PerCent         | Conc            |
|--------------|---------|-----------------|-------------------|-----------------|-----------------|
| 1            | 25.048  | 700172.4        | 19803886.2        | 91.6827         | 91.6827         |
| 2            | 27.223  | 59338.9         | 1796582.3         | 8.3173          | 8.3173          |
| <b>Total</b> |         | <b>759511.3</b> | <b>21600468.4</b> | <b>100.0000</b> | <b>100.0000</b> |



HPLC data of compound **15j**  
 (Chiralpak OD-H, Hexane/*i*-PrOH = 95/5, 0.7 mL/min, 214 nm)

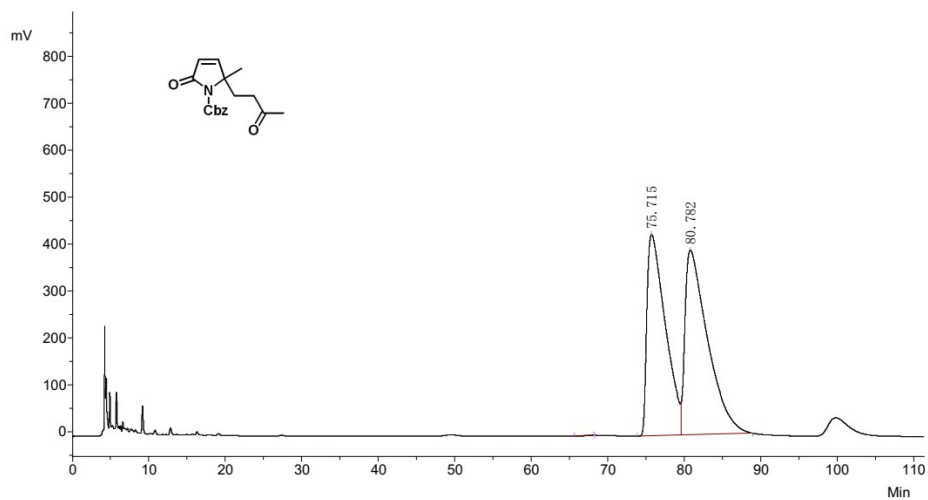

| No.          | R. Time | PeakHeight | PeakArea    | PerCent  | Conc     |
|--------------|---------|------------|-------------|----------|----------|
| 1            | 75.715  | 428670.1   | 71614938.4  | 46.9812  | 46.9812  |
| 2            | 80.782  | 393299.3   | 80818315.4  | 53.0188  | 53.0188  |
| <b>Total</b> |         | 821969.4   | 152433253.8 | 100.0000 | 100.0000 |

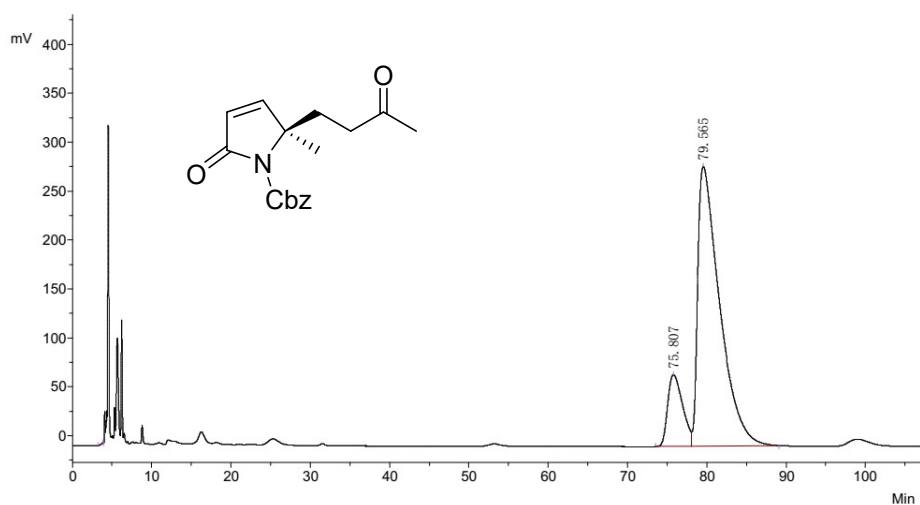

| No.          | R. Time | PeakHeight | PeakArea   | PerCent  | Conc     |
|--------------|---------|------------|------------|----------|----------|
| 1            | 75.807  | 73443.4    | 9622823.1  | 14.9516  | 14.9516  |
| 2            | 79.565  | 285959.9   | 54737077.6 | 85.0484  | 85.0484  |
| <b>Total</b> |         | 359403.3   | 64359900.7 | 100.0000 | 100.0000 |

HPLC data of compound **15k**  
 (Chiralpak OD-H, Hexane/*i*-PrOH = 85/15, 0.7 mL/min, 214 nm)

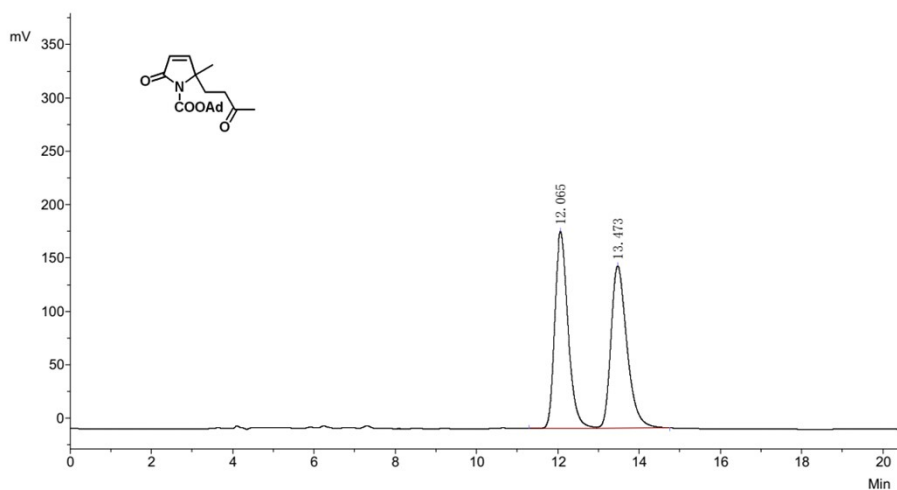

| No.          | R. Time | PeakHeight | PeakArea  | PerCent  | Conc     |
|--------------|---------|------------|-----------|----------|----------|
| 1            | 12.065  | 184543.1   | 4150436.3 | 49.9556  | 49.9556  |
| 2            | 13.473  | 152041.8   | 4157817.3 | 50.0444  | 50.0444  |
| <b>Total</b> |         | 336584.8   | 8308253.6 | 100.0000 | 100.0000 |

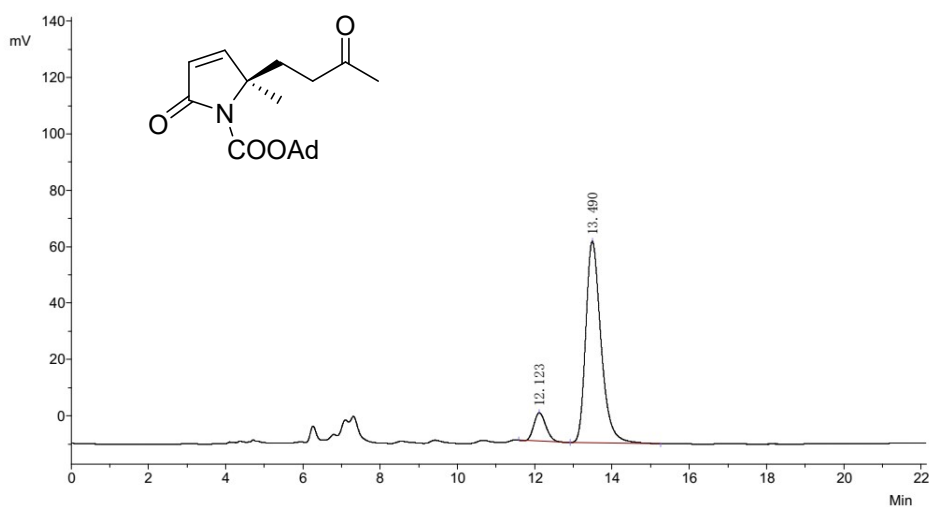

| No.          | R. Time | PeakHeight | PeakArea  | PerCent  | Conc     |
|--------------|---------|------------|-----------|----------|----------|
| 1            | 12.123  | 10047.8    | 215818.2  | 9.9112   | 9.9112   |
| 2            | 13.490  | 71602.8    | 1961690.3 | 90.0888  | 90.0888  |
| <b>Total</b> |         | 81650.6    | 2177508.5 | 100.0000 | 100.0000 |

HPLC data of compound **17a**  
 (Chiralpak IC, Hexane/*i*-PrOH/MeOH = 70/20/10, 0.7 mL/min, 214 nm)

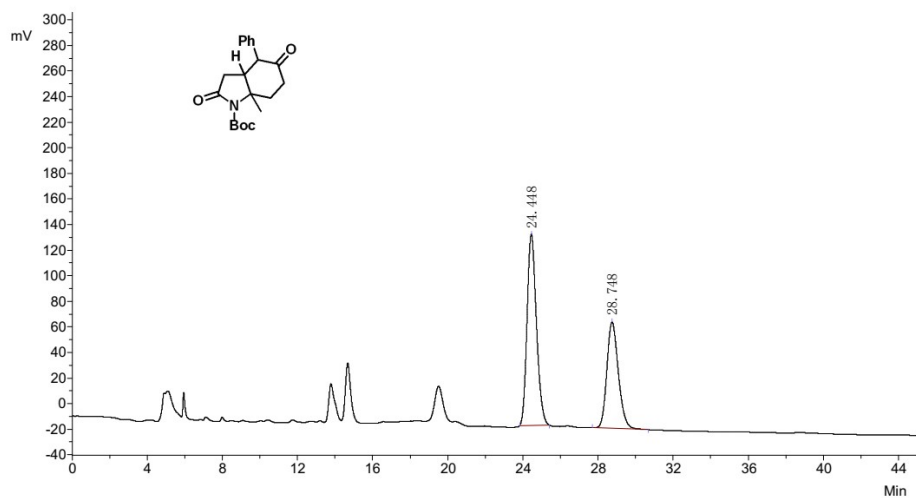

| No.          | R. Time | PeakHeight | PeakArea  | PerCent  | Conc     |
|--------------|---------|------------|-----------|----------|----------|
| 1            | 24.448  | 149567.6   | 5173692.6 | 59.3828  | 59.3828  |
| 2            | 28.748  | 83150.7    | 3538749.5 | 40.6172  | 40.6172  |
| <b>Total</b> |         | 232718.4   | 8712442.1 | 100.0000 | 100.0000 |

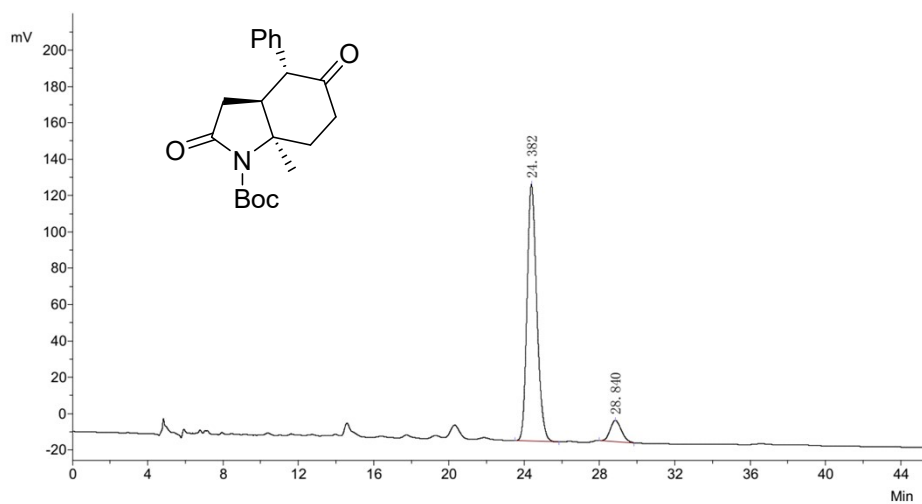

| No.          | R. Time | PeakHeight | PeakArea  | PerCent  | Conc     |
|--------------|---------|------------|-----------|----------|----------|
| 1            | 24.382  | 141316.6   | 5068045.5 | 91.4896  | 91.4896  |
| 2            | 28.840  | 11542.8    | 471428.7  | 8.5104   | 8.5104   |
| <b>Total</b> |         | 152859.5   | 5539474.2 | 100.0000 | 100.0000 |

HPLC data of compound **17b**  
 (Chiralpak IC, Hexane/*i*-PrOH/MeOH = 70/20/10, 0.4 mL/min, 214 nm)

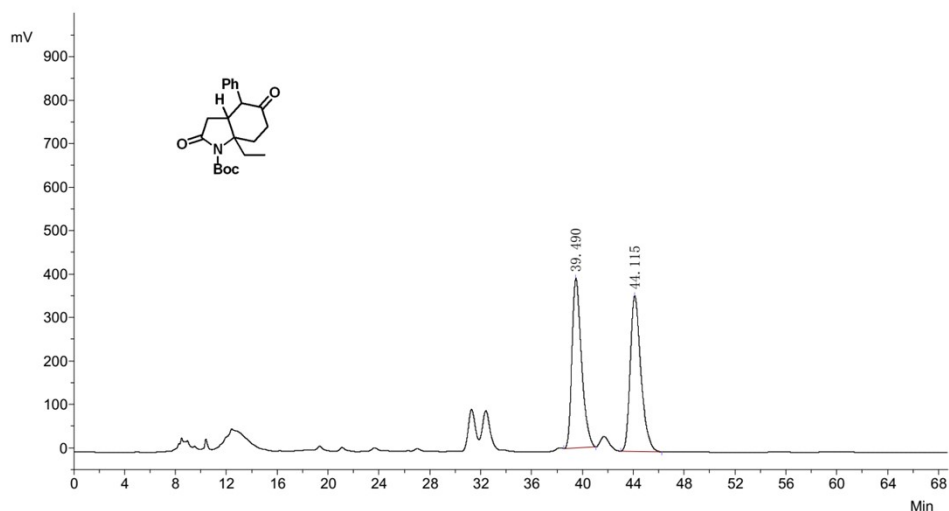

| No.   | R. Time | PeakHeight | PeakArea   | PerCent  | Conc     |
|-------|---------|------------|------------|----------|----------|
| 1     | 39.490  | 390503.1   | 20316300.0 | 49.2582  | 49.2582  |
| 2     | 44.115  | 357830.8   | 20928222.3 | 50.7418  | 50.7418  |
| Total |         | 748333.9   | 41244522.2 | 100.0000 | 100.0000 |

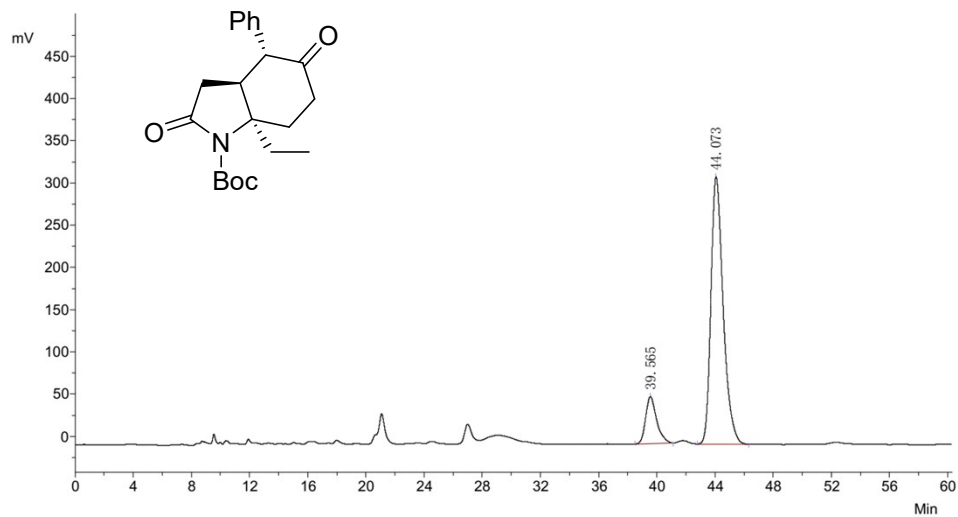

| No.   | R. Time | PeakHeight | PeakArea   | PerCent  | Conc     |
|-------|---------|------------|------------|----------|----------|
| 1     | 39.565  | 55571.6    | 2915313.0  | 13.6123  | 13.6123  |
| 2     | 44.073  | 316707.2   | 18501501.9 | 86.3877  | 86.3877  |
| Total |         | 372278.8   | 21416814.8 | 100.0000 | 100.0000 |

HPLC data of compound **17c**  
 (Chiralpak IC, Hexane/*i*-PrOH/MeOH = 70/20/10, 0.7 mL/min, 214 nm)

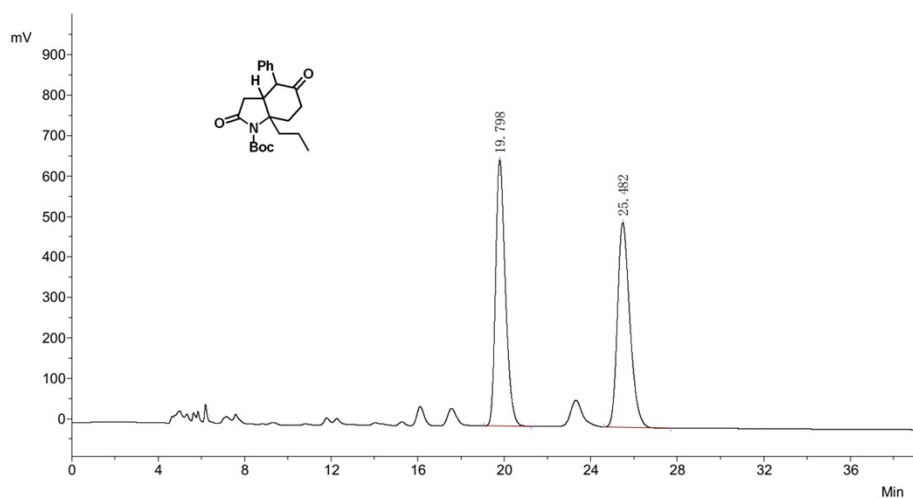

| No.   | R. Time | PeakHeight | PeakArea   | PerCent  | Conc     |
|-------|---------|------------|------------|----------|----------|
| 1     | 19.798  | 658600.9   | 20685417.8 | 50.6980  | 50.6980  |
| 2     | 25.482  | 506137.2   | 20115848.6 | 49.3020  | 49.3020  |
| Total |         | 1164738.0  | 40801266.4 | 100.0000 | 100.0000 |

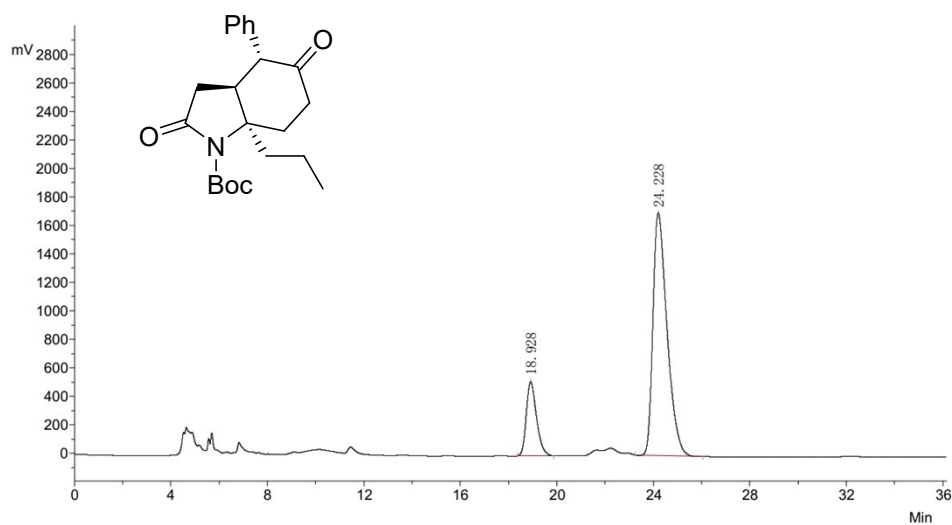

| No.   | R. Time | PeakHeight | PeakArea   | PerCent  | Conc     |
|-------|---------|------------|------------|----------|----------|
| 1     | 18.928  | 519109.0   | 15241702.3 | 18.0873  | 18.0873  |
| 2     | 24.228  | 1698240.5  | 69025520.8 | 81.9127  | 81.9127  |
| Total |         | 2217349.5  | 84267223.1 | 100.0000 | 100.0000 |

HPLC data of compound **17d**  
 (Chiralpak IC, Hexane/*i*-PrOH/MeOH = 70/20/10, 0.6 mL/min, 214 nm)

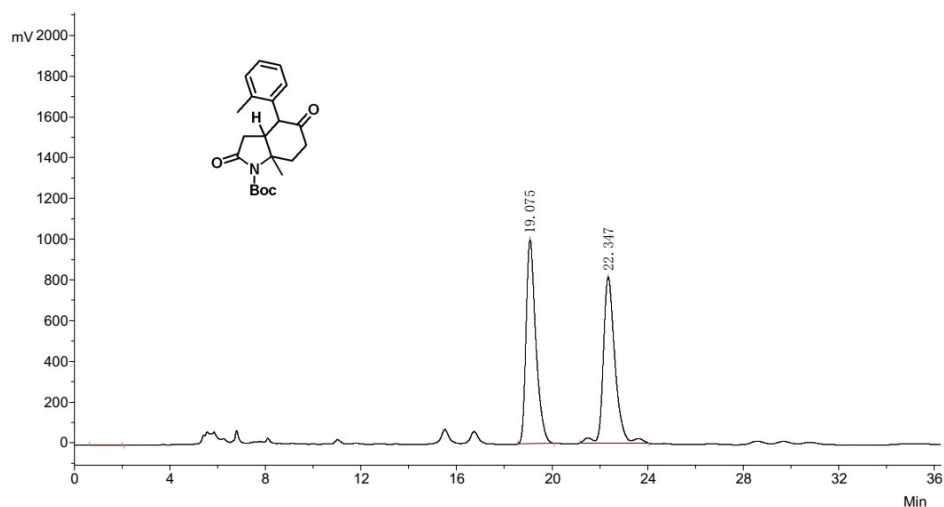

| No.   | R. Time | PeakHeight | PeakArea   | PerCent  | Conc     |
|-------|---------|------------|------------|----------|----------|
| 1     | 19.075  | 1003413.2  | 28329269.0 | 50.5142  | 50.5142  |
| 2     | 22.347  | 816221.9   | 27752534.8 | 49.4858  | 49.4858  |
| Total |         | 1819635.1  | 56081803.8 | 100.0000 | 100.0000 |

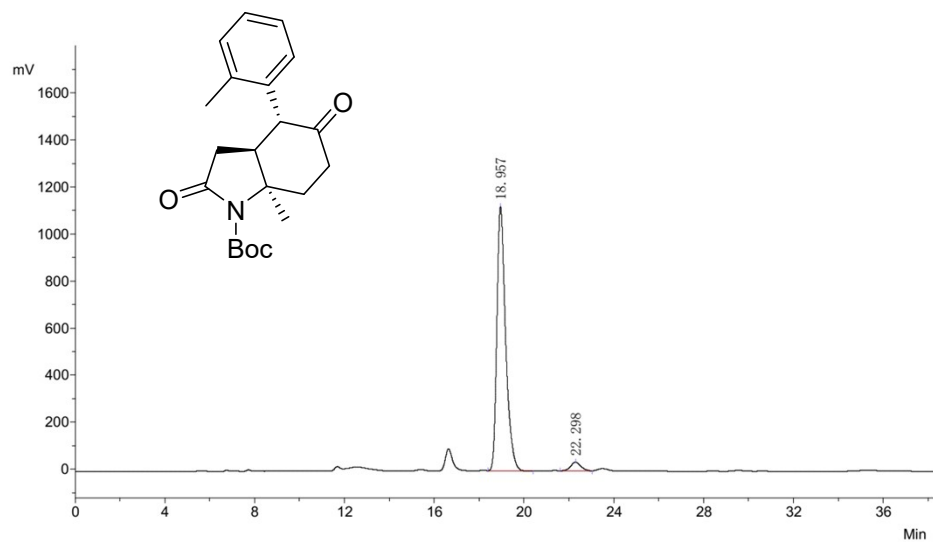

| No.   | R. Time | PeakHeight | PeakArea   | PerCent  | Conc     |
|-------|---------|------------|------------|----------|----------|
| 1     | 18.957  | 1123423.3  | 30416930.3 | 96.4601  | 96.4601  |
| 2     | 22.298  | 36041.5    | 1116251.5  | 3.5399   | 3.5399   |
| Total |         | 1159464.8  | 31533181.8 | 100.0000 | 100.0000 |

HPLC data of compound **17e**  
 (Chiralpak AD-H, Hexane/*i*-PrOH = 80/20, 0.7 mL/min, 214 nm)

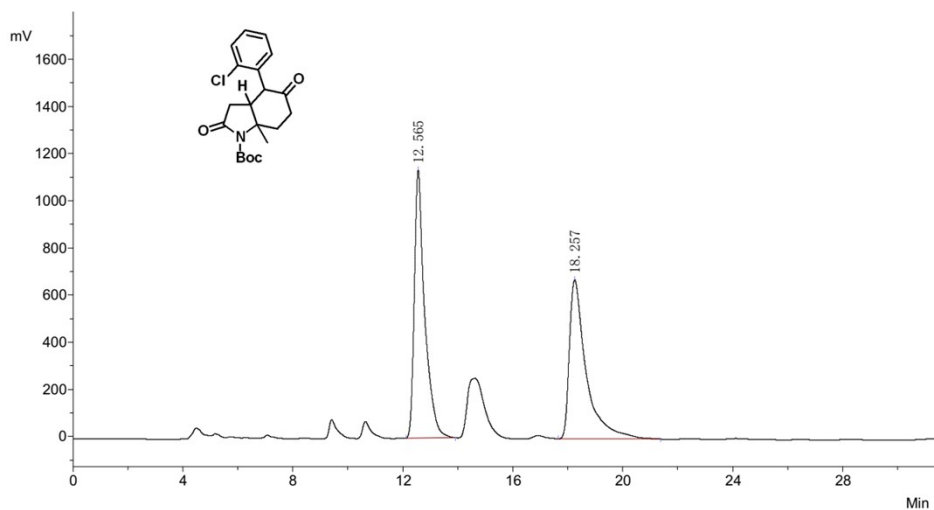

| No.   | R. Time | PeakHeight | PeakArea   | PerCent  | Conc     |
|-------|---------|------------|------------|----------|----------|
| 1     | 12.565  | 1137307.8  | 29745217.1 | 50.9320  | 50.9320  |
| 2     | 18.257  | 674134.9   | 28656560.5 | 49.0680  | 49.0680  |
| Total |         | 1811442.8  | 58401777.6 | 100.0000 | 100.0000 |

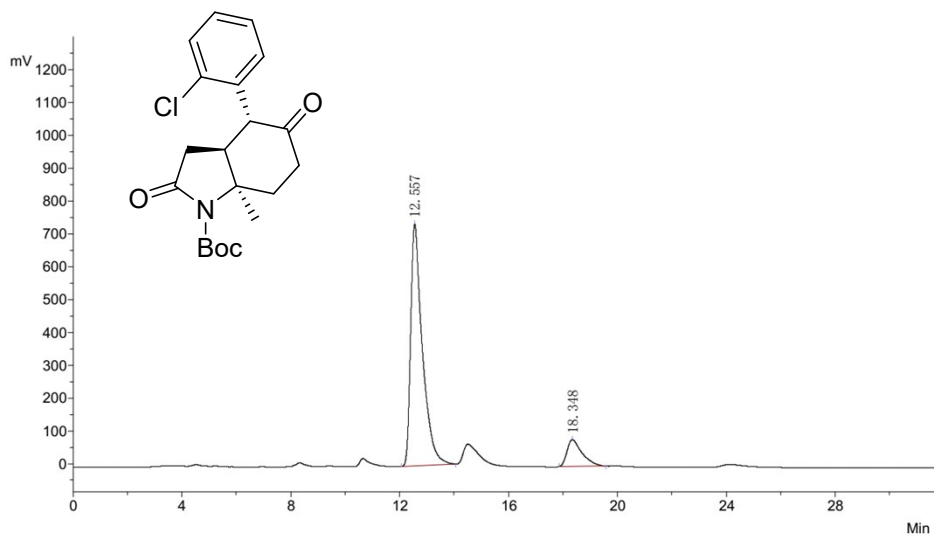

| No.   | R. Time | PeakHeight | PeakArea   | PerCent  | Conc     |
|-------|---------|------------|------------|----------|----------|
| 1     | 12.557  | 737847.0   | 21938123.4 | 87.4699  | 87.4699  |
| 2     | 18.348  | 81724.9    | 3142632.9  | 12.5301  | 12.5301  |
| Total |         | 819571.9   | 25080756.3 | 100.0000 | 100.0000 |

HPLC data of compound **17f**  
 (Chiralpak IC, Hexane/*i*-PrOH/MeOH = 70/20/10, 0.7 mL/min, 214 nm)

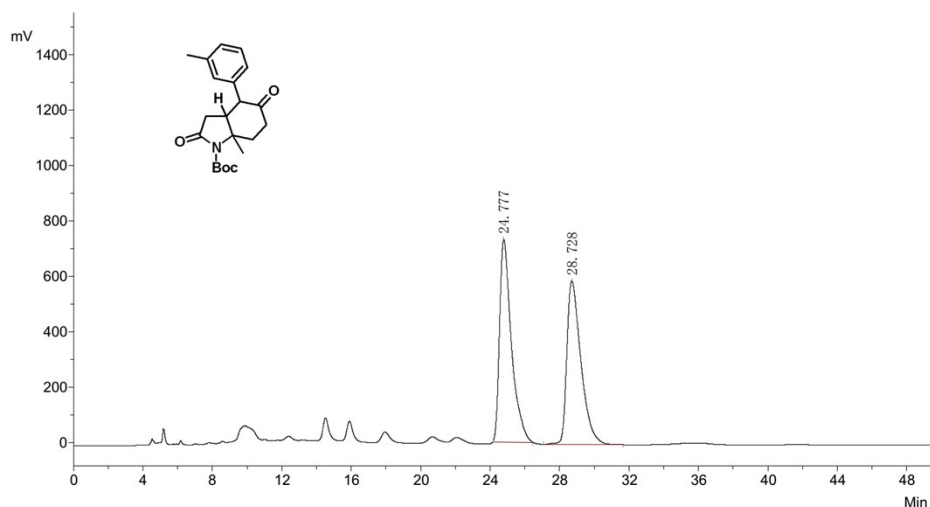

| No.          | R. Time | PeakHeight | PeakArea   | PerCent  | Conc     |
|--------------|---------|------------|------------|----------|----------|
| 1            | 24.777  | 729469.7   | 34548838.9 | 50.9511  | 50.9511  |
| 2            | 28.728  | 589876.8   | 33258979.0 | 49.0489  | 49.0489  |
| <b>Total</b> |         | 1319346.4  | 67807817.9 | 100.0000 | 100.0000 |

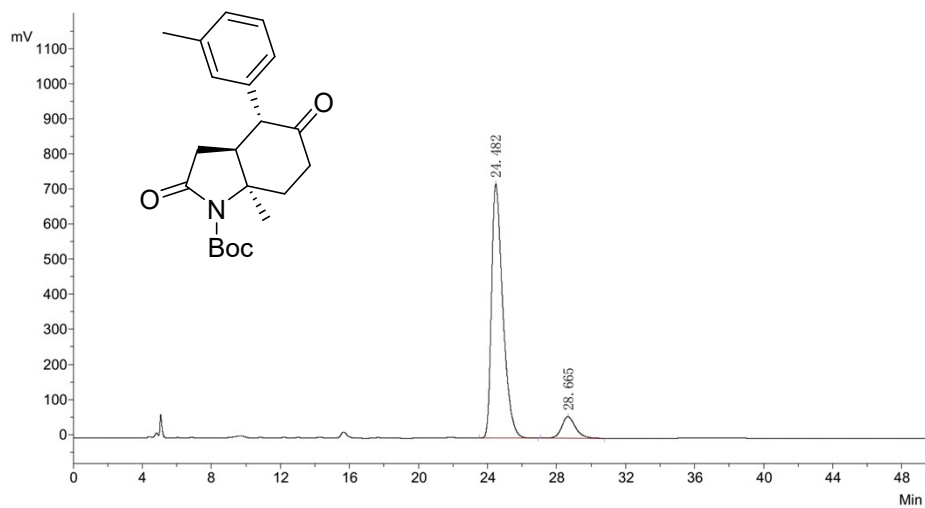

| No.          | R. Time | PeakHeight | PeakArea   | PerCent  | Conc     |
|--------------|---------|------------|------------|----------|----------|
| 1            | 24.482  | 724036.9   | 33037058.7 | 90.5848  | 90.5848  |
| 2            | 28.665  | 61457.6    | 3433792.0  | 9.4152   | 9.4152   |
| <b>Total</b> |         | 785494.5   | 36470850.7 | 100.0000 | 100.0000 |



HPLC data of compound **17g**  
 (Chiralpak IB-3, Hexane/*i*-PrOH = 70/30, 0.5 mL/min, 214 nm)

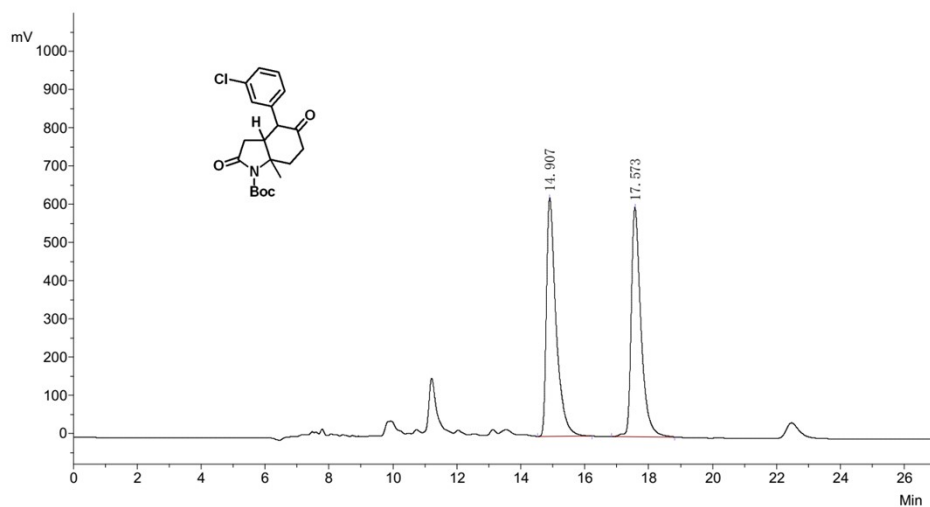

| No.   | R. Time | PeakHeight | PeakArea    | PerCent   | Conc      |
|-------|---------|------------|-------------|-----------|-----------|
| 1     | 14. 907 | 623878. 9  | 13030137. 1 | 50. 6442  | 50. 6442  |
| 2     | 17. 573 | 600560. 0  | 12698651. 9 | 49. 3558  | 49. 3558  |
| Total |         | 1224438. 9 | 25728789. 0 | 100. 0000 | 100. 0000 |

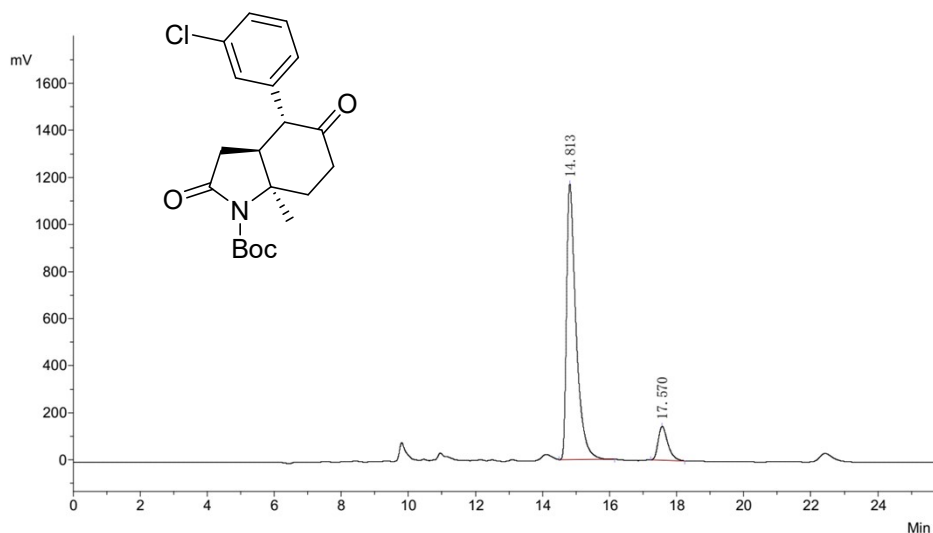

| No.   | R. Time | PeakHeight | PeakArea    | PerCent   | Conc      |
|-------|---------|------------|-------------|-----------|-----------|
| 1     | 14. 813 | 1171296. 0 | 22886833. 7 | 88. 8373  | 88. 8373  |
| 2     | 17. 570 | 143761. 3  | 2875793. 6  | 11. 1627  | 11. 1627  |
| Total |         | 1315057. 3 | 25762627. 3 | 100. 0000 | 100. 0000 |

HPLC data of compound **17h**  
 (Chiralpak OD-H, Hexane/*i*-PrOH = 85/15, 0.7 mL/min, 214 nm)

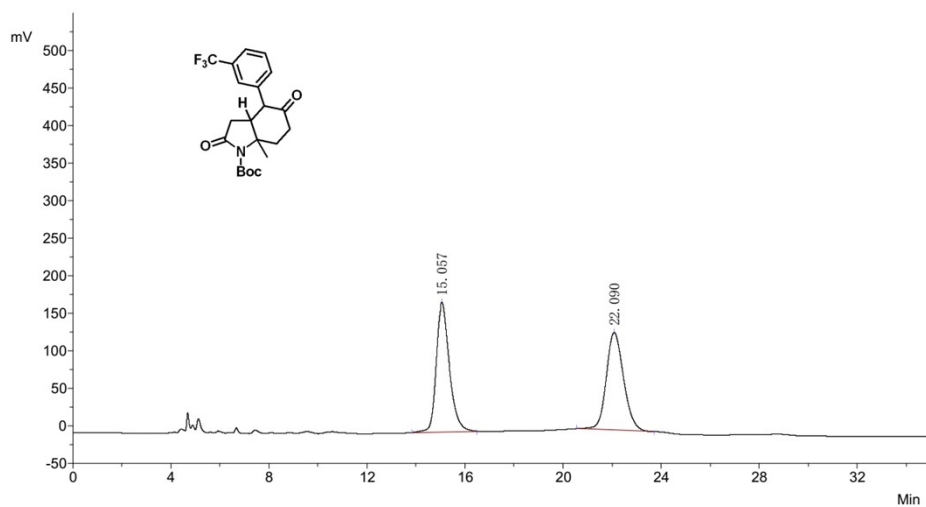

| No.   | R. Time | PeakHeight | PeakArea   | PerCent  | Conc     |
|-------|---------|------------|------------|----------|----------|
| 1     | 15.057  | 173375.6   | 6377674.7  | 49.9469  | 49.9469  |
| 2     | 22.090  | 130467.0   | 6391223.4  | 50.0531  | 50.0531  |
| Total |         | 303842.6   | 12768898.1 | 100.0000 | 100.0000 |

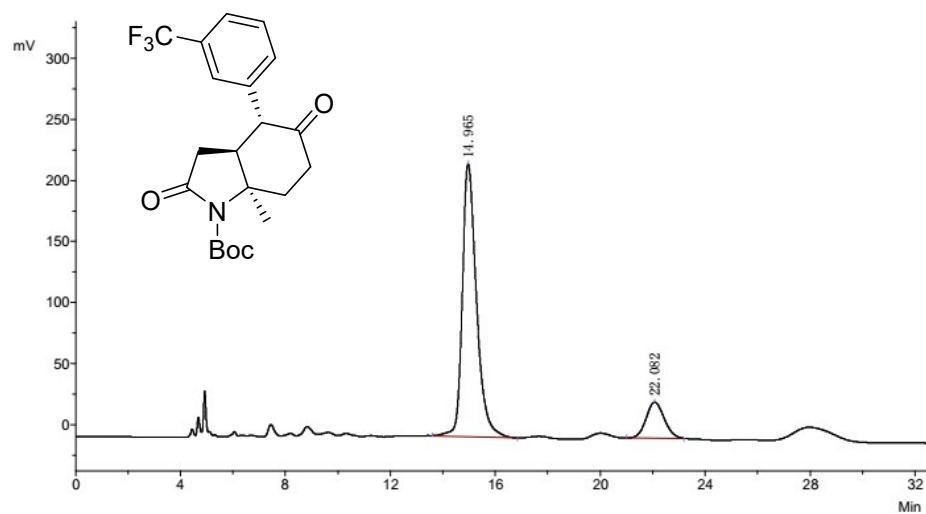

| No.   | R. Time | PeakHeight | PeakArea  | PerCent  | Conc     |
|-------|---------|------------|-----------|----------|----------|
| 1     | 14.965  | 223375.3   | 8361081.1 | 85.5213  | 85.5213  |
| 2     | 22.082  | 29528.5    | 1415521.3 | 14.4787  | 14.4787  |
| Total |         | 252903.8   | 9776602.4 | 100.0000 | 100.0000 |

HPLC data of compound **17i**  
 (Chiralpak IC, Hexane/*i*-PrOH/MeOH = 70/20/10, 0.7 mL/min, 214 nm)

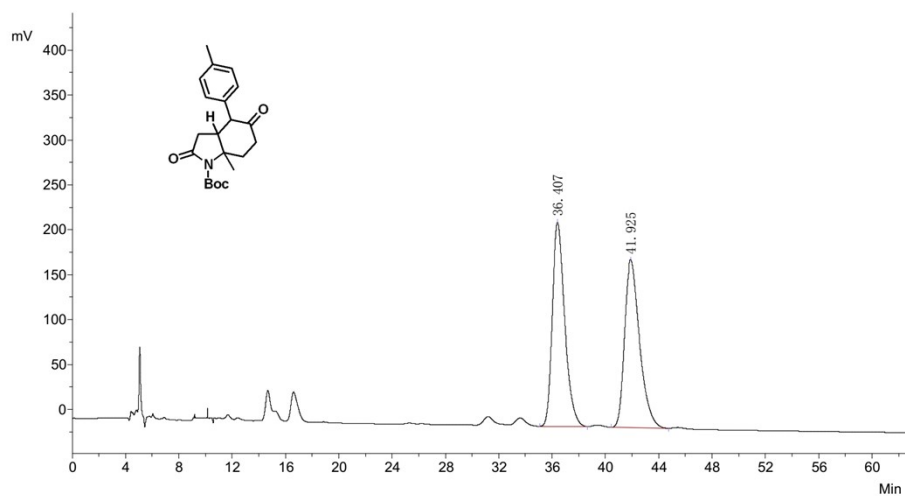

| No.          | R. Time | PeakHeight      | PeakArea          | PerCent         | Conc            |
|--------------|---------|-----------------|-------------------|-----------------|-----------------|
| 1            | 36.407  | 227338.8        | 14666994.5        | 50.2802         | 50.2802         |
| 2            | 41.925  | 187348.7        | 14503512.5        | 49.7198         | 49.7198         |
| <b>Total</b> |         | <b>414687.4</b> | <b>29170507.0</b> | <b>100.0000</b> | <b>100.0000</b> |

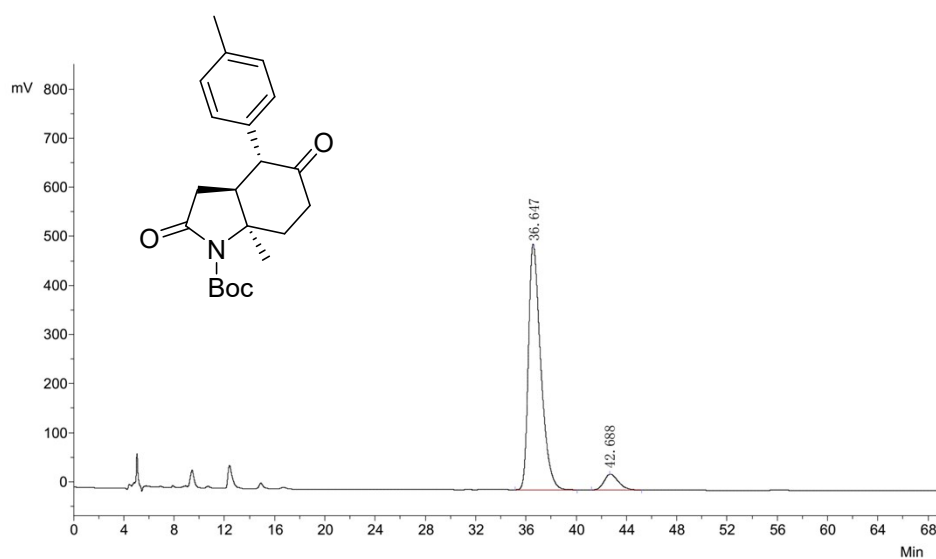

| No.          | R. Time | PeakHeight      | PeakArea          | PerCent         | Conc            |
|--------------|---------|-----------------|-------------------|-----------------|-----------------|
| 1            | 36.647  | 500306.0        | 33992709.2        | 93.0228         | 93.0228         |
| 2            | 42.688  | 32171.3         | 2549640.1         | 6.9772          | 6.9772          |
| <b>Total</b> |         | <b>532477.3</b> | <b>36542349.3</b> | <b>100.0000</b> | <b>100.0000</b> |

HPLC data of compound **17j**  
 (Chiralpak IC, Hexane/*i*-PrOH/MeOH = 70/20/10, 0.7 mL/min, 214 nm)

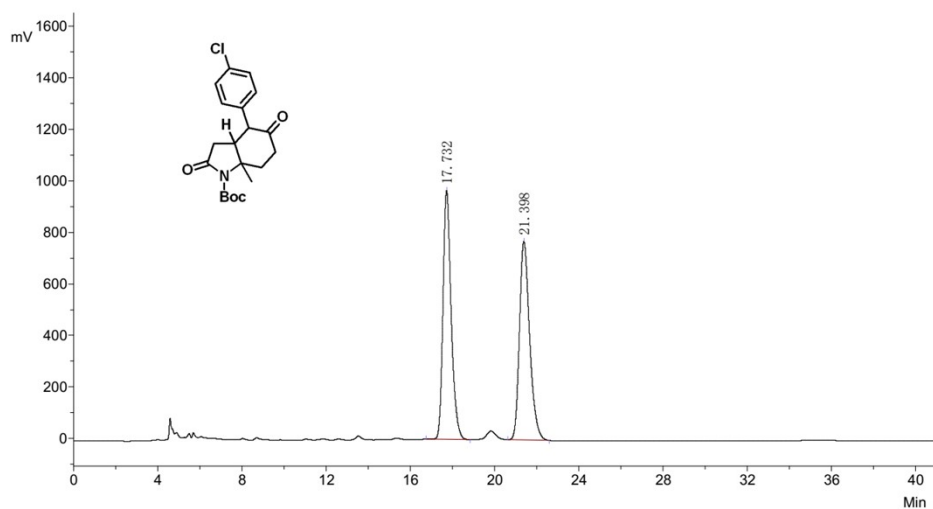

| No.   | R. Time | PeakHeight | PeakArea   | PerCent  | Conc     |
|-------|---------|------------|------------|----------|----------|
| 1     | 17.732  | 965375.8   | 25986962.9 | 50.0798  | 50.0798  |
| 2     | 21.398  | 771189.5   | 25904187.8 | 49.9202  | 49.9202  |
| Total |         | 1736565.3  | 51891150.7 | 100.0000 | 100.0000 |

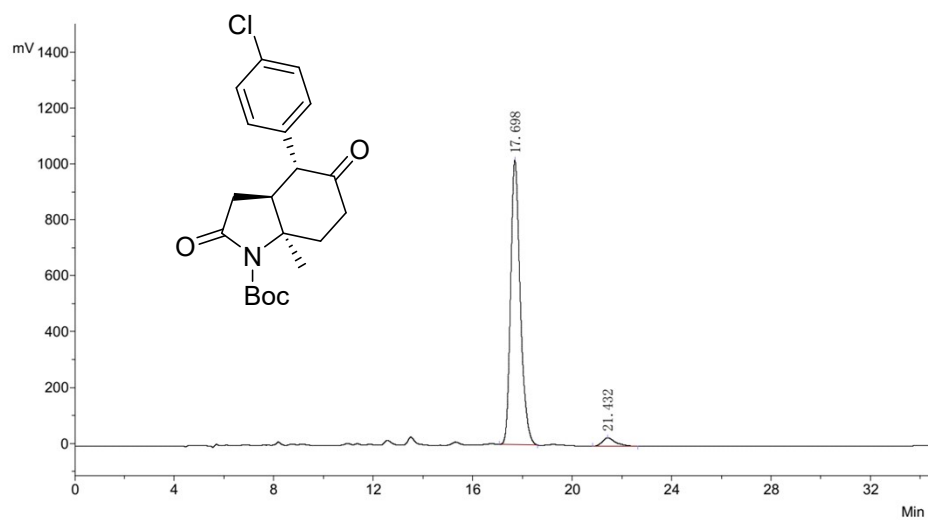

| No.   | R. Time | PeakHeight | PeakArea   | PerCent  | Conc     |
|-------|---------|------------|------------|----------|----------|
| 1     | 17.698  | 1018533.4  | 27416014.2 | 96.0948  | 96.0948  |
| 2     | 21.432  | 29905.1    | 1114165.6  | 3.9052   | 3.9052   |
| Total |         | 1048438.4  | 28530179.8 | 100.0000 | 100.0000 |

HPLC data of compound **17k**  
 (Chiralpak IC, Hexane/*i*-PrOH/MeOH = 70/20/10, 0.7 mL/min, 214 nm)

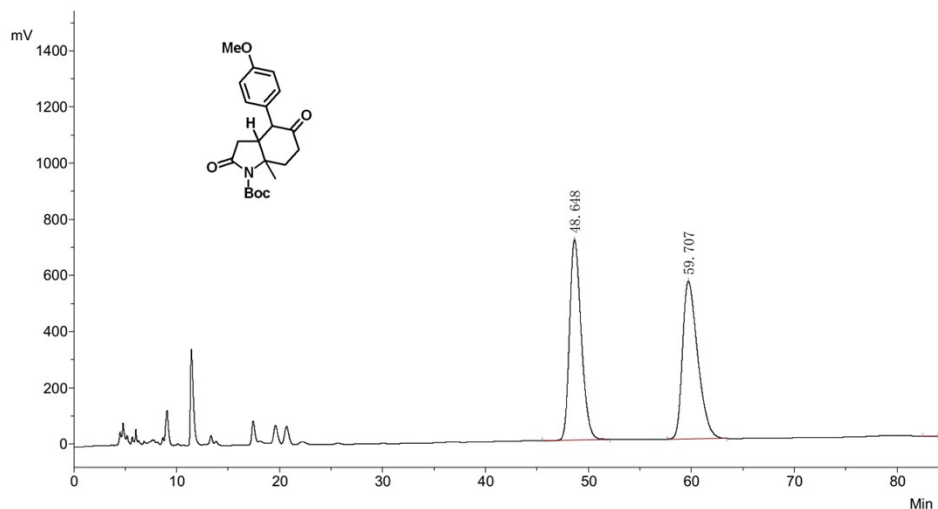

| No.   | R. Time | PeakHeight | PeakArea    | PerCent  | Conc     |
|-------|---------|------------|-------------|----------|----------|
| 1     | 48.648  | 714136.0   | 56224439.3  | 49.4362  | 49.4362  |
| 2     | 59.707  | 561737.7   | 57506967.9  | 50.5638  | 50.5638  |
| Total |         | 1275873.7  | 113731407.1 | 100.0000 | 100.0000 |

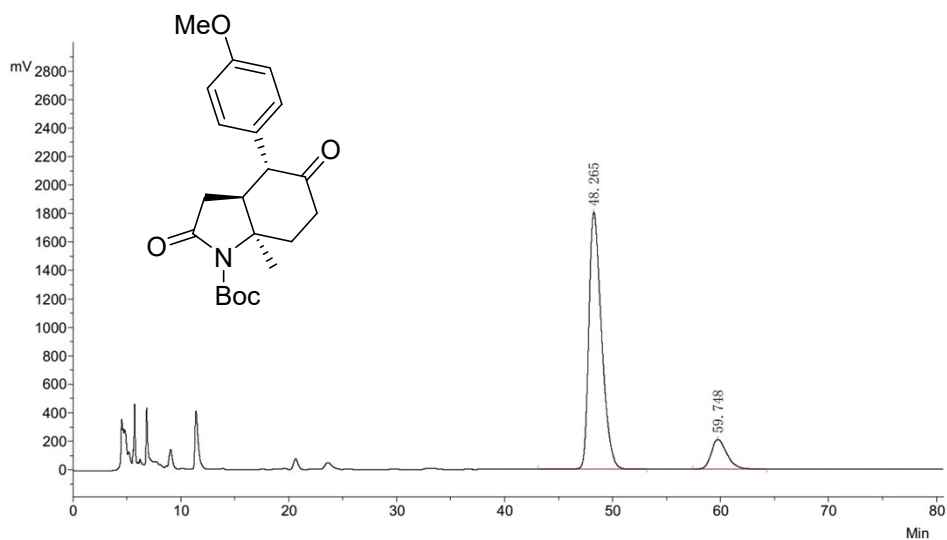

| No.   | R. Time | PeakHeight | PeakArea    | PerCent  | Conc     |
|-------|---------|------------|-------------|----------|----------|
| 1     | 48.265  | 1803439.4  | 147155244.4 | 87.4855  | 87.4855  |
| 2     | 59.748  | 208520.6   | 21050124.2  | 12.5145  | 12.5145  |
| Total |         | 2011960.0  | 168205368.6 | 100.0000 | 100.0000 |

HPLC data of compound **15d** (Recrystallization)  
 (Chiralpak AD-H, Hexane/*i*-PrOH/MeOH = 95/5/5, 0.7 mL/min, 214 nm)

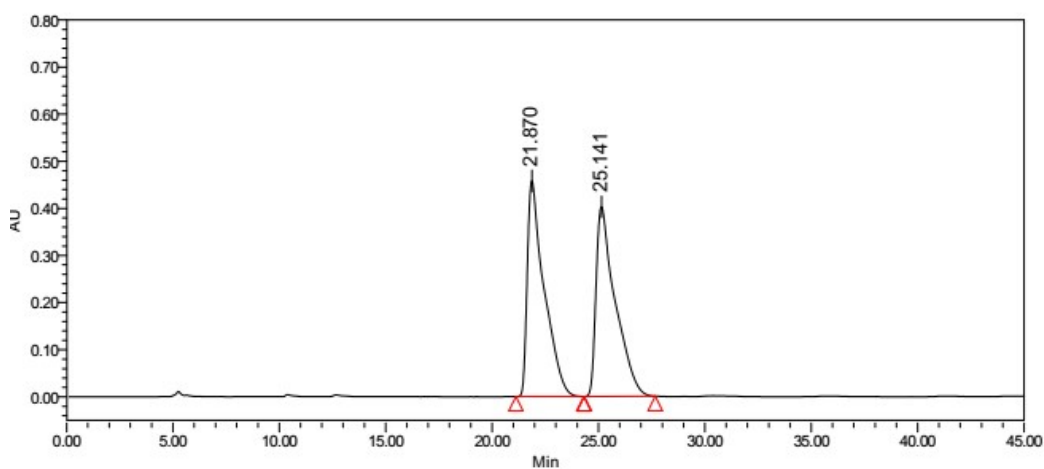

|   | R.Time<br>(分钟) | PeakHeight<br>(微伏) | PeakArea<br>(微伏*秒) | PerCent<br>(%) |
|---|----------------|--------------------|--------------------|----------------|
| 1 | 21.870         | 458318             | 25304508           | 50.12          |
| 2 | 25.141         | 402644             | 25179134           | 49.88          |

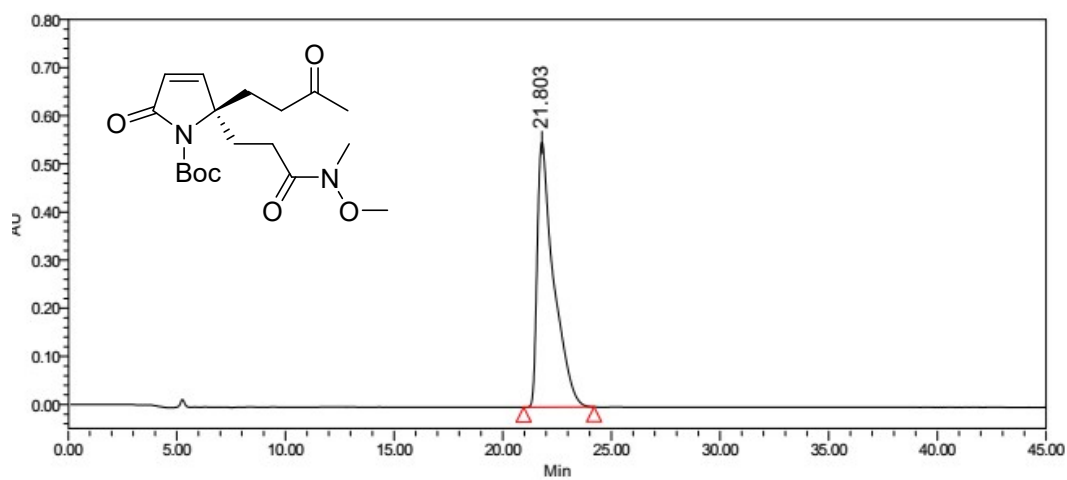

|   | R.Time<br>(分钟) | PeakHeight<br>(微伏) | PeakArea<br>(微伏*秒) | PerCent<br>(%) |
|---|----------------|--------------------|--------------------|----------------|
| 1 | 21.803         | 550054             | 29091798           | 100.00         |

## 7. X-Ray Single Crystal Diffraction Data

Compound **15d**

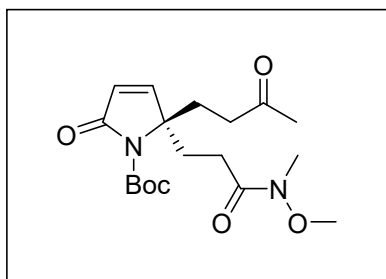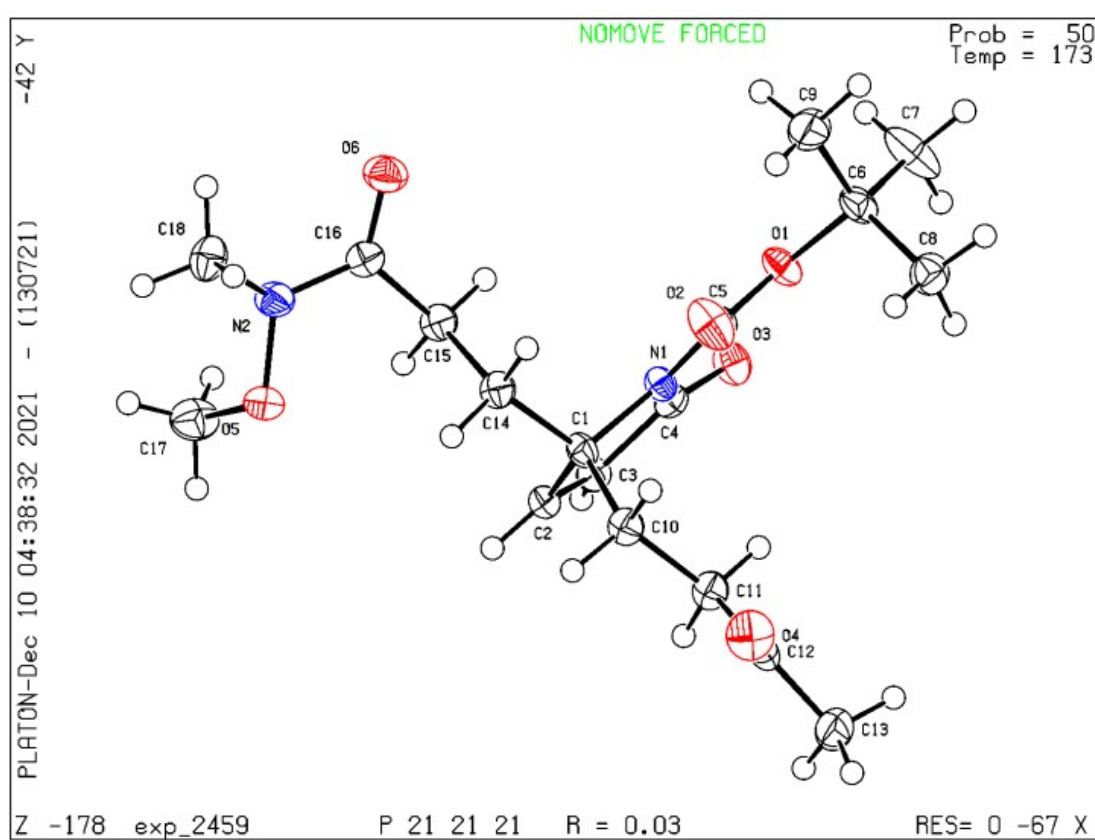

Figure S1. X-ray crystallographic structure of **15d**

**Table S8 Crystal data and structure refinement for 15d.**

|                                             |                                                               |
|---------------------------------------------|---------------------------------------------------------------|
| Identification code                         | 15d                                                           |
| Empirical formula                           | C <sub>18</sub> H <sub>28</sub> N <sub>2</sub> O <sub>6</sub> |
| Formula weight                              | 368.42                                                        |
| Temperature/K                               | 173.00(10)                                                    |
| Crystal system                              | orthorhombic                                                  |
| Space group                                 | P2 <sub>1</sub> 2 <sub>1</sub> 2 <sub>1</sub>                 |
| a/Å                                         | 7.53431(4)                                                    |
| b/Å                                         | 11.74547(7)                                                   |
| c/Å                                         | 21.92815(13)                                                  |
| α/°                                         | 90                                                            |
| β/°                                         | 90                                                            |
| γ/°                                         | 90                                                            |
| Volume/Å <sup>3</sup>                       | 1940.51(2)                                                    |
| Z                                           | 4                                                             |
| ρ <sub>calc</sub> /cm <sup>3</sup>          | 1.261                                                         |
| μ/mm <sup>-1</sup>                          | 0.785                                                         |
| F(000)                                      | 792.0                                                         |
| Crystal size/mm <sup>3</sup>                | 0.42 × 0.36 × 0.28                                            |
| Radiation                                   | CuKα (λ = 1.54184)                                            |
| 2θ range for data collection/°              | 8.54 to 134.132                                               |
| Index ranges                                | -9 ≤ h ≤ 9, -14 ≤ k ≤ 14, -26 ≤ l ≤ 26                        |
| Reflections collected                       | 43698                                                         |
| Independent reflections                     | 3438 [R <sub>int</sub> = 0.0307, R <sub>sigma</sub> = 0.0109] |
| Data/restraints/parameters                  | 3438/0/241                                                    |
| Goodness-of-fit on F <sup>2</sup>           | 1.108                                                         |
| Final R indexes [I ≥ 2σ (I)]                | R <sub>1</sub> = 0.0271, wR <sub>2</sub> = 0.0686             |
| Final R indexes [all data]                  | R <sub>1</sub> = 0.0272, wR <sub>2</sub> = 0.0687             |
| Largest diff. peak/hole / e Å <sup>-3</sup> | 0.16/-0.17                                                    |
| Flack parameter                             | 0.01(3)                                                       |

**Table S9 Fractional Atomic Coordinates (×10<sup>4</sup>) and Equivalent Isotropic Displacement Parameters (Å<sup>2</sup>×10<sup>3</sup>) for 15d. U<sub>eq</sub> is defined as 1/3 of of the trace of the orthogonalised U<sub>ij</sub> tensor.**

| Atom | x           | y          | z          | U(eq)   |
|------|-------------|------------|------------|---------|
| O1   | 641.1(15)   | 2808.1(10) | 6294.3(5)  | 26.3(3) |
| O2   | -150.0(19)  | 4663.3(11) | 6322.0(7)  | 36.7(3) |
| O3   | 3258.8(17)  | 2270.4(10) | 5515.3(6)  | 27.9(3) |
| O4   | -1950.5(19) | 6415.3(12) | 4680.0(7)  | 38.2(3) |
| O5   | 6476.8(16)  | 7694.8(10) | 6379.7(5)  | 26.3(3) |
| O6   | 4715.8(19)  | 6041.6(11) | 7547.9(5)  | 33.4(3) |
| N1   | 2285.2(18)  | 4103.6(11) | 5783.1(6)  | 19.4(3) |
| N2   | 6197(2)     | 7307.2(13) | 6979.9(6)  | 26.7(3) |
| C1   | 2760(2)     | 5286.0(13) | 5597.6(7)  | 20.5(3) |
| C2   | 4327(2)     | 5062.0(14) | 5191.5(7)  | 21.3(3) |
| C3   | 4667(2)     | 3963.3(14) | 5130.0(7)  | 21.3(3) |
| C4   | 3377(2)     | 3297.9(14) | 5486.7(7)  | 20.0(3) |
| C5   | 807(2)      | 3902.8(14) | 6154.4(7)  | 23.2(3) |
| C6   | -973(2)     | 2413.8(15) | 6632.0(8)  | 26.4(4) |
| C7   | -630(3)     | 1146.8(18) | 6697.4(12) | 48.0(6) |



|     |          |            |           |         |
|-----|----------|------------|-----------|---------|
| C8  | -2595(2) | 2615.8(17) | 6240.9(8) | 30.8(4) |
| C9  | -1104(3) | 2981(2)    | 7249.4(9) | 44.7(5) |
| C10 | 1254(2)  | 5871.0(14) | 5239.1(7) | 23.1(3) |
| C11 | 599(2)   | 5215.0(14) | 4686.5(8) | 24.6(4) |
| C12 | -1071(2) | 5707.1(15) | 4413.2(8) | 25.8(4) |
| C13 | -1625(3) | 5243.4(17) | 3808.1(9) | 36.0(5) |
| C14 | 3299(2)  | 6028.8(14) | 6146.5(7) | 23.4(3) |
| C15 | 4967(2)  | 5613.4(14) | 6480.3(8) | 24.5(4) |
| C16 | 5276(2)  | 6324.7(14) | 7045.3(8) | 23.6(4) |
| C17 | 8337(3)  | 7645.0(19) | 6240.8(9) | 36.7(4) |
| C18 | 6182(3)  | 8198.7(16) | 7439.7(8) | 30.0(4) |

**Table S10 Anisotropic Displacement Parameters ( $\text{\AA}^2 \times 10^3$ ) for 15d. The Anisotropic displacement factor exponent takes the form:  $-2\pi^2[h^2a^*2U_{11}+2hka^*b^*U_{12}+\dots]$ .**

| Atom | $U_{11}$ | $U_{22}$ | $U_{33}$ | $U_{23}$ | $U_{13}$ | $U_{12}$  |
|------|----------|----------|----------|----------|----------|-----------|
| O1   | 21.4(6)  | 25.2(6)  | 32.2(6)  | 7.1(5)   | 8.5(5)   | 0.5(5)    |
| O2   | 35.2(7)  | 25.8(6)  | 49.1(8)  | -3.4(6)  | 20.0(6)  | 1.7(6)    |
| O3   | 29.5(6)  | 16.7(6)  | 37.5(7)  | -1.0(5)  | 2.4(5)   | 1.8(5)    |
| O4   | 31.9(8)  | 33.8(7)  | 48.8(8)  | 0.0(6)   | -1.2(6)  | 10.3(6)   |
| O5   | 29.1(6)  | 27.1(6)  | 22.6(6)  | 3.9(5)   | 1.3(5)   | 1.5(5)    |
| O6   | 43.8(8)  | 32.5(7)  | 23.8(6)  | 1.1(5)   | 4.8(6)   | -3.1(6)   |
| N1   | 20.5(7)  | 15.8(6)  | 21.8(6)  | -1.1(5)  | 3.0(5)   | -0.2(5)   |
| N2   | 37.0(8)  | 23.9(7)  | 19.2(6)  | -3.2(6)  | 3.9(6)   | -1.9(7)   |
| C1   | 23.5(8)  | 14.4(7)  | 23.8(8)  | -0.2(6)  | 2.5(7)   | -2.1(6)   |
| C2   | 20.6(8)  | 23.3(8)  | 20.2(8)  | 1.1(6)   | 0.6(7)   | -3.6(6)   |
| C3   | 17.8(8)  | 26.0(8)  | 20.1(7)  | -1.2(7)  | 2.0(6)   | 1.3(7)    |
| C4   | 20.1(8)  | 20.0(8)  | 20.1(7)  | -1.7(6)  | -2.5(6)  | 2.6(6)    |
| C5   | 23.1(8)  | 22.9(8)  | 23.5(8)  | 0.0(6)   | 2.6(6)   | -1.2(7)   |
| C6   | 20.1(8)  | 29.8(9)  | 29.3(8)  | 6.6(7)   | 6.7(7)   | -1.5(7)   |
| C7   | 36.3(12) | 36.6(11) | 71.3(15) | 26.8(11) | 21.1(11) | 4.5(9)    |
| C8   | 25.0(9)  | 37.1(10) | 30.5(9)  | -1.7(8)  | 1.7(7)   | -1.7(8)   |
| C9   | 35.7(11) | 73.6(15) | 24.6(9)  | -0.6(10) | 4.7(8)   | -18.8(11) |
| C10  | 25.2(9)  | 17.9(7)  | 26.3(8)  | -1.9(6)  | -0.1(7)  | 2.6(7)    |
| C11  | 25.6(9)  | 20.0(8)  | 28.3(8)  | -1.6(6)  | -2.1(7)  | 2.3(7)    |
| C12  | 23.3(8)  | 20.3(8)  | 33.8(9)  | 6.8(7)   | 0.2(7)   | -3.9(7)   |
| C13  | 37.0(11) | 32.5(10) | 38.3(10) | 5.0(8)   | -12.3(8) | -5.6(8)   |
| C14  | 27.2(9)  | 18.3(7)  | 24.7(8)  | -3.1(7)  | -0.1(7)  | 0.9(7)    |
| C15  | 31.2(9)  | 17.3(8)  | 25.1(8)  | -2.0(6)  | -1.7(7)  | 2.1(7)    |
| C16  | 25.3(8)  | 21.6(8)  | 23.8(8)  | -0.9(6)  | -1.0(7)  | 4.9(7)    |
| C17  | 31.5(10) | 47.5(11) | 31.2(9)  | 2.1(9)   | 6.5(8)   | 5.4(9)    |
| C18  | 30.4(9)  | 28.6(9)  | 31.0(9)  | -11.4(7) | 0.2(8)   | -0.4(7)   |

**Table S11 Bond Lengths for 15d.**

| Atom | Atom | Length/ $\text{\AA}$ | Atom | Atom | Length/ $\text{\AA}$ |
|------|------|----------------------|------|------|----------------------|
| O1   | C5   | 1.328(2)             | C1   | C2   | 1.502(2)             |
| O1   | C6   | 1.4971(19)           | C1   | C10  | 1.542(2)             |
| O2   | C5   | 1.205(2)             | C1   | C14  | 1.541(2)             |

|    |     |            |     |     |          |
|----|-----|------------|-----|-----|----------|
| O3 | C4  | 1.212(2)   | C2  | C3  | 1.322(2) |
| O4 | C12 | 1.214(2)   | C3  | C4  | 1.472(2) |
| O5 | N2  | 1.4086(18) | C6  | C7  | 1.517(3) |
| O5 | C17 | 1.435(2)   | C6  | C8  | 1.512(2) |
| O6 | C16 | 1.226(2)   | C6  | C9  | 1.512(3) |
| N1 | C1  | 1.491(2)   | C10 | C11 | 1.518(2) |
| N1 | C4  | 1.412(2)   | C11 | C12 | 1.509(2) |
| N1 | C5  | 1.399(2)   | C12 | C13 | 1.494(3) |
| N2 | C16 | 1.354(2)   | C14 | C15 | 1.534(2) |
| N2 | C18 | 1.454(2)   | C15 | C16 | 1.512(2) |

**Table S12 Bond Angles for 15d.**

| Atom | Atom | Atom | Angle/°    | Atom | Atom | Atom | Angle/°    |
|------|------|------|------------|------|------|------|------------|
| C5   | O1   | C6   | 119.37(13) | O1   | C5   | N1   | 111.88(14) |
| N2   | O5   | C17  | 109.36(13) | O2   | C5   | O1   | 126.21(16) |
| C4   | N1   | C1   | 111.04(13) | O2   | C5   | N1   | 121.91(15) |
| C5   | N1   | C1   | 120.44(13) | O1   | C6   | C7   | 102.24(14) |
| C5   | N1   | C4   | 128.18(14) | O1   | C6   | C8   | 109.12(13) |
| O5   | N2   | C18  | 114.60(14) | O1   | C6   | C9   | 111.07(15) |
| C16  | N2   | O5   | 116.82(13) | C8   | C6   | C7   | 110.18(17) |
| C16  | N2   | C18  | 122.46(15) | C8   | C6   | C9   | 112.69(16) |
| N1   | C1   | C2   | 100.79(13) | C9   | C6   | C7   | 111.04(18) |
| N1   | C1   | C10  | 112.19(13) | C11  | C10  | C1   | 114.82(14) |
| N1   | C1   | C14  | 112.18(13) | C12  | C11  | C10  | 113.16(14) |
| C2   | C1   | C10  | 110.75(13) | O4   | C12  | C11  | 121.77(16) |
| C2   | C1   | C14  | 110.77(14) | O4   | C12  | C13  | 121.69(17) |
| C14  | C1   | C10  | 109.88(13) | C13  | C12  | C11  | 116.50(16) |
| C3   | C2   | C1   | 112.54(14) | C15  | C14  | C1   | 114.13(14) |
| C2   | C3   | C4   | 109.64(15) | C16  | C15  | C14  | 109.95(14) |
| O3   | C4   | N1   | 126.94(16) | O6   | C16  | N2   | 120.17(16) |
| O3   | C4   | C3   | 127.20(16) | O6   | C16  | C15  | 122.25(16) |
| N1   | C4   | C3   | 105.86(13) | N2   | C16  | C15  | 117.58(15) |

**Table S13 Hydrogen Atom Coordinates ( $\text{\AA} \times 10^4$ ) and Isotropic Displacement Parameters ( $\text{\AA}^2 \times 10^3$ ) for 15d.**

| Atom | x        | y       | z       | U(eq) |
|------|----------|---------|---------|-------|
| H2   | 4986.25  | 5632.83 | 5004.07 | 26    |
| H3   | 5581.36  | 3657.56 | 4896.92 | 26    |
| H7A  | -512.06  | 810.79  | 6300.33 | 72    |
| H7B  | -1605.18 | 798.52  | 6908.6  | 72    |
| H7C  | 443.67   | 1029.3  | 6924.49 | 72    |
| H8A  | -2805.26 | 3419.23 | 6205.48 | 46    |
| H8B  | -3606.71 | 2258.35 | 6426.01 | 46    |
| H8C  | -2404.31 | 2297.99 | 5842.94 | 46    |
| H9A  | -6.74    | 2883.34 | 7465.81 | 67    |
| H9B  | -2052.87 | 2642.1  | 7478.12 | 67    |
| H9C  | -1335.04 | 3778.98 | 7196.26 | 67    |

|      |          |         |         |    |
|------|----------|---------|---------|----|
| H10A | 260.28   | 5993.24 | 5512.78 | 28 |
| H10B | 1666.25  | 6612.4  | 5105.37 | 28 |
| H11A | 1524.06  | 5210.75 | 4378.71 | 30 |
| H11B | 376.42   | 4431.95 | 4804.38 | 30 |
| H13A | -2081.07 | 4486.3  | 3859.52 | 54 |
| H13B | -619.81  | 5224.7  | 3539.22 | 54 |
| H13C | -2530.24 | 5721.28 | 3636.58 | 54 |
| H14A | 3501.66  | 6800.53 | 6005.27 | 28 |
| H14B | 2320.85  | 6049.83 | 6433.76 | 28 |
| H15A | 4823.29  | 4820.69 | 6594.1  | 29 |
| H15B | 5986.27  | 5671.31 | 6211.81 | 29 |
| H17A | 8508.53  | 7767.59 | 5812.02 | 55 |
| H17B | 8793.91  | 6910.42 | 6351.17 | 55 |
| H17C | 8952.15  | 8223.77 | 6466.36 | 55 |
| H18A | 7136.15  | 8721.28 | 7362.87 | 45 |
| H18B | 6329.43  | 7865.23 | 7836.18 | 45 |
| H18C | 5071.84  | 8598.38 | 7423.64 | 45 |

Compound 17j

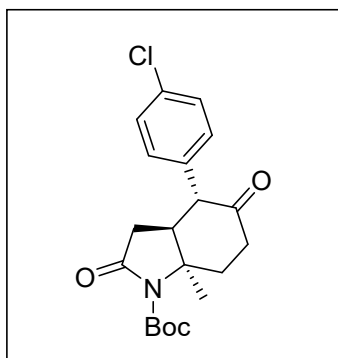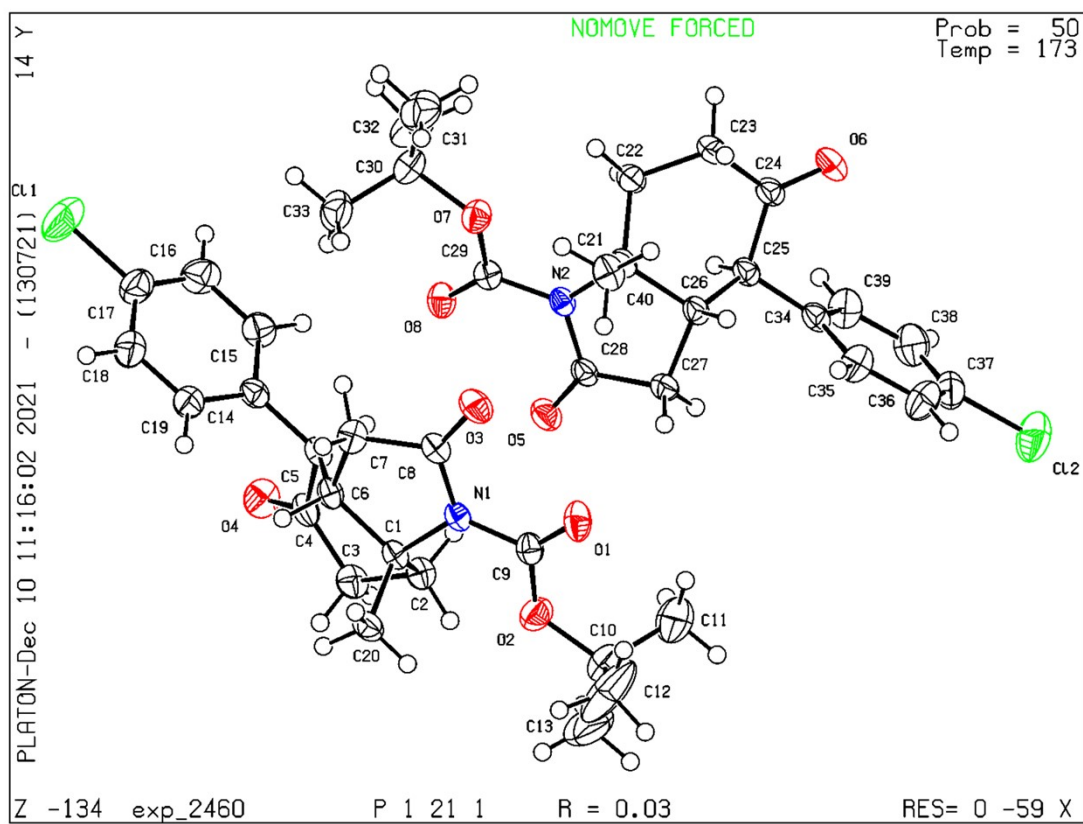

Figure S2. X-ray crystallographic structure of 17j

**Table S14 Crystal data and structure refinement for 17j.**

|                                             |                                                               |
|---------------------------------------------|---------------------------------------------------------------|
| Identification code                         | 17j                                                           |
| Empirical formula                           | C <sub>20</sub> H <sub>24</sub> ClNO <sub>4</sub>             |
| Formula weight                              | 377.85                                                        |
| Temperature/K                               | 173.00(10)                                                    |
| Crystal system                              | monoclinic                                                    |
| Space group                                 | P2 <sub>1</sub>                                               |
| a/Å                                         | 12.41290(10)                                                  |
| b/Å                                         | 6.44320(10)                                                   |
| c/Å                                         | 24.3361(3)                                                    |
| α/°                                         | 90                                                            |
| β/°                                         | 101.1400(10)                                                  |
| γ/°                                         | 90                                                            |
| Volume/Å <sup>3</sup>                       | 1909.70(4)                                                    |
| Z                                           | 4                                                             |
| ρ <sub>calc</sub> /g/cm <sup>3</sup>        | 1.314                                                         |
| μ/mm <sup>-1</sup>                          | 1.978                                                         |
| F(000)                                      | 800.0                                                         |
| Crystal size/mm <sup>3</sup>                | 0.36 × 0.28 × 0.22                                            |
| Radiation                                   | CuKα (λ = 1.54184)                                            |
| 2θ range for data collection/°              | 7.258 to 134.12                                               |
| Index ranges                                | -14 ≤ h ≤ 14, -7 ≤ k ≤ 7, -29 ≤ l ≤ 29                        |
| Reflections collected                       | 42350                                                         |
| Independent reflections                     | 6817 [R <sub>int</sub> = 0.0504, R <sub>sigma</sub> = 0.0305] |
| Data/restraints/parameters                  | 6817/1/478                                                    |
| Goodness-of-fit on F <sup>2</sup>           | 1.078                                                         |
| Final R indexes [I ≥ 2σ (I)]                | R <sub>1</sub> = 0.0299, wR <sub>2</sub> = 0.0866             |
| Final R indexes [all data]                  | R <sub>1</sub> = 0.0315, wR <sub>2</sub> = 0.0878             |
| Largest diff. peak/hole / e Å <sup>-3</sup> | 0.18/-0.19                                                    |
| Flack parameter                             | 0.008(5)                                                      |

**Table S15 Fractional Atomic Coordinates (×10<sup>4</sup>) and Equivalent Isotropic Displacement Parameters (Å<sup>2</sup>×10<sup>3</sup>) for 17j. U<sub>eq</sub> is defined as 1/3 of the trace of the orthogonalised U<sub>ij</sub> tensor.**

| Atom | x          | y          | z          | U(eq)   |
|------|------------|------------|------------|---------|
| C11  | 10056.9(6) | 4090.3(13) | 5522.8(4)  | 71.6(3) |
| O1   | 3632.9(12) | 9110(3)    | 7733.3(6)  | 37.6(4) |
| O2   | 2527.3(12) | 8866(3)    | 6883.3(6)  | 38.5(4) |
| O3   | 5783.2(12) | 8593(3)    | 7704.5(6)  | 36.5(4) |
| O4   | 4910.4(13) | 4272(3)    | 5117.4(6)  | 39.2(4) |
| N1   | 4340.0(13) | 8598(2)    | 6936.4(6)  | 23.2(3) |
| C1   | 4174.5(15) | 8528(3)    | 6310.7(7)  | 23.3(4) |
| C2   | 3384.1(16) | 6775(3)    | 6068.4(8)  | 28.2(4) |
| C3   | 3561.5(16) | 6129(3)    | 5488.8(8)  | 31.5(5) |
| C4   | 4692.7(16) | 5313(3)    | 5493.8(8)  | 27.1(4) |
| C5   | 5552.8(15) | 5885(3)    | 6011.8(7)  | 24.1(4) |
| C6   | 5363.9(16) | 8115(3)    | 6208.2(8)  | 24.6(4) |
| C7   | 6128.5(15) | 8612(3)    | 6762.5(8)  | 28.5(4) |
| C8   | 5438.5(16) | 8589(3)    | 7206.1(7)  | 25.2(4) |
| C9   | 3497.9(16) | 8886(3)    | 7236.9(8)  | 26.7(4) |
| C10  | 1504.2(18) | 9283(4)    | 7084.6(10) | 41.3(5) |

|     |            |            |            |          |
|-----|------------|------------|------------|----------|
| C11 | 1337(2)    | 7703(6)    | 7511.8(12) | 66.0(8)  |
| C12 | 1533(2)    | 11465(5)   | 7298.9(19) | 96.1(14) |
| C13 | 647(2)     | 8996(8)    | 6560.7(14) | 88.4(14) |
| C14 | 6700.6(16) | 5496(3)    | 5903.5(7)  | 26.6(4)  |
| C15 | 7150.2(19) | 3519(3)    | 5982.8(9)  | 35.6(5)  |
| C16 | 8178(2)    | 3066(4)    | 5866.3(10) | 43.4(6)  |
| C17 | 8756.6(19) | 4612(4)    | 5664.7(10) | 41.8(6)  |
| C18 | 8334.2(19) | 6604(4)    | 5578.4(11) | 44.8(6)  |
| C19 | 7305.3(17) | 7023(4)    | 5695.0(9)  | 36.4(5)  |
| C20 | 3789.7(18) | 10655(3)   | 6067.1(8)  | 33.2(5)  |
| Cl2 | -35.3(5)   | -457.3(13) | 9476.2(3)  | 63.3(2)  |
| O5  | 4228.5(12) | 3847(2)    | 7306.3(5)  | 32.9(3)  |
| O6  | 5073.9(13) | -478(3)    | 9848.5(6)  | 41.3(4)  |
| O7  | 7501.5(11) | 4035(2)    | 8087.8(6)  | 31.5(3)  |
| O8  | 6387.3(11) | 3327(3)    | 7255.3(5)  | 31.6(3)  |
| N2  | 5697.8(12) | 3728(2)    | 8060.7(6)  | 22.3(3)  |
| C21 | 5887.9(15) | 3853(3)    | 8688.2(7)  | 23.7(4)  |
| C22 | 6666.1(16) | 2121(3)    | 8953.9(8)  | 28.6(4)  |
| C23 | 6441.2(16) | 1509(3)    | 9526.8(8)  | 31.5(5)  |
| C24 | 5306.2(16) | 658(3)     | 9494.8(7)  | 27.2(4)  |
| C25 | 4462.6(15) | 1315(3)    | 8978.0(7)  | 24.8(4)  |
| C26 | 4700.2(15) | 3552(3)    | 8804.6(7)  | 24.6(4)  |
| C27 | 3947.4(16) | 4192(3)    | 8258.3(8)  | 30.9(5)  |
| C28 | 4594.7(15) | 3884(3)    | 7802.9(7)  | 24.4(4)  |
| C29 | 6529.9(15) | 3664(3)    | 7749.5(8)  | 24.0(4)  |
| C30 | 8538.2(16) | 3603(4)    | 7899.7(10) | 36.3(5)  |
| C31 | 9387(2)    | 4233(6)    | 8407.8(11) | 55.6(7)  |
| C32 | 8592(2)    | 1305(4)    | 7780.0(13) | 56.5(7)  |
| C33 | 8647.9(18) | 4946(4)    | 7405.2(9)  | 45.6(6)  |
| C34 | 3310.1(16) | 956(3)     | 9079.5(7)  | 26.4(4)  |
| C35 | 2722.4(17) | 2474(4)    | 9302.1(9)  | 35.5(5)  |
| C36 | 1695.5(19) | 2057(4)    | 9424.0(10) | 42.9(6)  |
| C37 | 1258.7(18) | 85(4)      | 9326.4(9)  | 39.4(5)  |
| C38 | 1818(2)    | -1440(4)   | 9108.1(11) | 45.4(6)  |
| C39 | 2841.5(19) | -995(3)    | 8988.8(10) | 39.3(5)  |
| C40 | 6298.8(18) | 6005(3)    | 8894.6(8)  | 32.3(5)  |

**Table S16 Anisotropic Displacement Parameters ( $\text{\AA}^2 \times 10^3$ ) for 17j. The Anisotropic displacement factor exponent takes the form:  $-2\pi^2[\text{h}^2\text{a}^2\text{U}_{11} + 2\text{hka}^*\text{b}^*\text{U}_{12} + \dots]$ .**

| Atom | $U_{11}$ | $U_{22}$ | $U_{33}$ | $U_{23}$ | $U_{13}$ | $U_{12}$ |
|------|----------|----------|----------|----------|----------|----------|
| Cl1  | 51.7(4)  | 80.7(7)  | 91.7(6)  | 1.8(4)   | 36.7(4)  | 22.3(4)  |
| O1   | 42.9(8)  | 47.2(9)  | 25.7(7)  | -5.1(7)  | 14.6(6)  | -8.6(7)  |
| O2   | 31.4(8)  | 51.8(10) | 33.3(8)  | -3.8(7)  | 8.5(6)   | 6.9(7)   |
| O3   | 42.7(8)  | 43.2(9)  | 21.2(7)  | 1.0(6)   | 0.2(6)   | -1.9(7)  |
| O4   | 44.9(8)  | 42.8(9)  | 29.7(8)  | -15.7(7) | 6.8(6)   | -2.1(7)  |
| N1   | 30.7(8)  | 20.5(7)  | 18.5(7)  | 0.2(6)   | 5.4(6)   | -0.7(6)  |
| C1   | 31.0(9)  | 20.7(9)  | 18.6(8)  | 0.7(7)   | 5.4(7)   | -0.7(7)  |
| C2   | 31.6(10) | 28.0(10) | 25.0(10) | -2.5(8)  | 5.4(7)   | -3.4(8)  |
| C3   | 34.6(10) | 36.3(11) | 21.6(9)  | -6.0(8)  | 0.4(8)   | -5.7(9)  |

|     |          |          |          |           |          |           |
|-----|----------|----------|----------|-----------|----------|-----------|
| C4  | 35.6(10) | 26.3(10) | 19.6(9)  | -0.7(8)   | 5.7(7)   | -6.0(8)   |
| C5  | 31.9(10) | 20.7(9)  | 19.5(8)  | 0.3(7)    | 4.8(7)   | -2.1(7)   |
| C6  | 32.0(10) | 20.6(9)  | 21.9(9)  | -0.2(7)   | 7.2(7)   | -4.0(7)   |
| C7  | 29.3(10) | 29.4(10) | 26.7(10) | -8.7(8)   | 5.2(8)   | -6.3(8)   |
| C8  | 33.4(10) | 20.2(9)  | 21.7(9)  | -1.0(7)   | 4.1(8)   | -2.3(8)   |
| C9  | 32.4(10) | 22.3(9)  | 27.0(10) | -0.7(8)   | 9.5(8)   | -2.9(8)   |
| C10 | 31.5(11) | 42.7(13) | 53.3(14) | -4.0(11)  | 17.0(10) | 2.9(9)    |
| C11 | 42.1(14) | 76(2)    | 83(2)    | 16.7(18)  | 21.8(13) | -13.2(14) |
| C12 | 59.7(18) | 43.7(17) | 204(4)   | -33(2)    | 73(2)    | -5.0(14)  |
| C13 | 37.4(14) | 157(4)   | 67.6(19) | 1(2)      | 0.8(13)  | 26(2)     |
| C14 | 33.0(10) | 27.0(10) | 19.3(9)  | -1.4(7)   | 3.8(7)   | 1.2(8)    |
| C15 | 44.7(12) | 26.4(10) | 37.2(11) | -0.4(9)   | 11.5(9)  | 3.2(9)    |
| C16 | 49.2(13) | 36.2(13) | 44.9(13) | -5.2(10)  | 9.4(10)  | 11.8(10)  |
| C17 | 37.1(12) | 51.5(14) | 38.7(12) | -3.8(11)  | 12.0(10) | 8.7(11)   |
| C18 | 39.7(12) | 48.0(15) | 50.7(14) | 10.8(12)  | 18.8(10) | 3.1(11)   |
| C19 | 36.5(11) | 34.4(11) | 40.7(12) | 8.9(9)    | 13.4(9)  | 5.4(9)    |
| C20 | 41.4(11) | 28.2(11) | 30.5(10) | 8.8(9)    | 7.9(8)   | 4.7(9)    |
| Cl2 | 47.1(4)  | 75.4(6)  | 74.2(5)  | 2.5(4)    | 28.3(3)  | -17.6(3)  |
| O5  | 36.6(8)  | 38.4(8)  | 22.6(7)  | 2.9(6)    | 3.0(6)   | -0.5(6)   |
| O6  | 45.1(8)  | 46.0(10) | 32.7(8)  | 18.5(7)   | 7.6(7)   | 2.4(7)    |
| O7  | 28.5(7)  | 38.2(8)  | 28.5(7)  | -4.3(6)   | 7.5(6)   | -2.6(6)   |
| O8  | 36.7(7)  | 35.9(8)  | 23.8(7)  | -5.1(6)   | 10.1(6)  | -3.0(6)   |
| N2  | 29.6(8)  | 19.3(7)  | 18.8(7)  | -0.7(6)   | 6.6(6)   | 0.7(6)    |
| C21 | 32.1(10) | 22.2(10) | 17.0(8)  | -0.8(7)   | 5.7(7)   | 1.5(8)    |
| C22 | 32.3(10) | 29.2(10) | 24.6(10) | 3.1(8)    | 5.7(8)   | 4.5(8)    |
| C23 | 35.1(10) | 36.9(12) | 21.3(9)  | 6.0(8)    | 2.5(8)   | 4.5(9)    |
| C24 | 34.7(10) | 26.8(10) | 20.6(9)  | 1.5(8)    | 6.4(7)   | 6.8(8)    |
| C25 | 32.4(10) | 23.3(9)  | 19.3(9)  | 0.7(7)    | 6.4(7)   | 3.4(7)    |
| C26 | 32.6(10) | 22.6(9)  | 20.2(9)  | 0.8(7)    | 9.0(7)   | 5.0(8)    |
| C27 | 34.5(10) | 32.6(11) | 27.3(10) | 9.2(8)    | 10.3(8)  | 12.0(8)   |
| C28 | 31.3(10) | 19.1(9)  | 23.2(9)  | 4.4(7)    | 6.3(8)   | 1.8(7)    |
| C29 | 29.2(10) | 18.4(9)  | 24.7(9)  | -2.0(7)   | 6.2(7)   | -2.0(7)   |
| C30 | 26.6(10) | 40.9(12) | 43.5(12) | -3.0(10)  | 11.5(9)  | -1.7(9)   |
| C31 | 33.6(12) | 81(2)    | 49.9(14) | -3.8(15)  | 1.4(10)  | -6.8(13)  |
| C32 | 38.9(12) | 41.5(14) | 92(2)    | -8.8(14)  | 19.9(12) | 4.6(11)   |
| C33 | 36.9(12) | 55.4(15) | 47.2(13) | 1.4(12)   | 15.0(10) | -9.6(11)  |
| C34 | 33.0(10) | 27.6(10) | 18.4(9)  | 1.1(7)    | 4.0(7)   | 1.5(8)    |
| C35 | 34.8(10) | 34.7(12) | 38.4(11) | -10.9(9)  | 10.5(9)  | -4.6(9)   |
| C36 | 36.1(11) | 50.1(14) | 45.4(13) | -12.4(11) | 15.1(9)  | 0.0(11)   |
| C37 | 36.5(11) | 50.0(14) | 32.8(11) | 2.2(10)   | 9.7(9)   | -7.7(10)  |
| C38 | 50.1(14) | 38.0(13) | 49.8(14) | 0.9(11)   | 13.6(11) | -11.6(11) |
| C39 | 47.9(13) | 28.7(12) | 44.4(12) | -5.3(10)  | 16.8(10) | -3.6(10)  |
| C40 | 44.3(11) | 27.0(10) | 26.3(10) | -6.6(8)   | 8.4(8)   | -3.4(9)   |

**Table S17 Bond Lengths for 17j.**

| Atom | Atom | Length/Å | Atom | Atom | Length/Å |
|------|------|----------|------|------|----------|
| Cl1  | C17  | 1.747(2) | Cl2  | C37  | 1.750(2) |
| O1   | C9   | 1.196(2) | O5   | C28  | 1.206(2) |
| O2   | C9   | 1.338(2) | O6   | C24  | 1.207(2) |

|     |     |          |     |     |          |
|-----|-----|----------|-----|-----|----------|
| O2  | C10 | 1.472(2) | O7  | C29 | 1.344(2) |
| O3  | C8  | 1.206(2) | O7  | C30 | 1.473(2) |
| O4  | C4  | 1.208(2) | O8  | C29 | 1.201(2) |
| N1  | C1  | 1.497(2) | N2  | C21 | 1.502(2) |
| N1  | C8  | 1.394(2) | N2  | C28 | 1.395(2) |
| N1  | C9  | 1.399(2) | N2  | C29 | 1.394(2) |
| C1  | C2  | 1.537(3) | C21 | C22 | 1.535(3) |
| C1  | C6  | 1.567(3) | C21 | C26 | 1.566(3) |
| C1  | C20 | 1.533(3) | C21 | C40 | 1.529(3) |
| C2  | C3  | 1.527(3) | C22 | C23 | 1.526(3) |
| C3  | C4  | 1.497(3) | C23 | C24 | 1.500(3) |
| C4  | C5  | 1.531(2) | C24 | C25 | 1.533(2) |
| C5  | C6  | 1.546(3) | C25 | C26 | 1.546(3) |
| C5  | C14 | 1.519(3) | C25 | C34 | 1.516(3) |
| C6  | C7  | 1.526(2) | C26 | C27 | 1.526(3) |
| C7  | C8  | 1.502(3) | C27 | C28 | 1.502(3) |
| C10 | C11 | 1.498(4) | C30 | C31 | 1.517(3) |
| C10 | C12 | 1.498(4) | C30 | C32 | 1.513(3) |
| C10 | C13 | 1.506(4) | C30 | C33 | 1.510(3) |
| C14 | C15 | 1.389(3) | C34 | C35 | 1.391(3) |
| C14 | C19 | 1.392(3) | C34 | C39 | 1.385(3) |
| C15 | C16 | 1.391(3) | C35 | C36 | 1.390(3) |
| C16 | C17 | 1.373(4) | C36 | C37 | 1.384(4) |
| C17 | C18 | 1.387(4) | C37 | C38 | 1.368(4) |
| C18 | C19 | 1.387(3) | C38 | C39 | 1.387(3) |

**Table S18 Bond Angles for 17j.**

| Atom | Atom | Atom | Angle/°    | Atom | Atom | Atom | Angle/°    |
|------|------|------|------------|------|------|------|------------|
| C9   | O2   | C10  | 120.78(16) | C29  | O7   | C30  | 120.69(15) |
| C8   | N1   | C1   | 114.08(15) | C28  | N2   | C21  | 113.65(15) |
| C8   | N1   | C9   | 121.07(15) | C29  | N2   | C21  | 124.52(15) |
| C9   | N1   | C1   | 124.47(15) | C29  | N2   | C28  | 121.56(15) |
| N1   | C1   | C2   | 111.37(15) | N2   | C21  | C22  | 110.60(15) |
| N1   | C1   | C6   | 102.63(14) | N2   | C21  | C26  | 102.06(14) |
| N1   | C1   | C20  | 109.73(15) | N2   | C21  | C40  | 111.08(15) |
| C2   | C1   | C6   | 111.43(15) | C22  | C21  | C26  | 111.82(15) |
| C20  | C1   | C2   | 112.38(16) | C40  | C21  | C22  | 112.24(16) |
| C20  | C1   | C6   | 108.85(15) | C40  | C21  | C26  | 108.59(16) |
| C3   | C2   | C1   | 111.06(16) | C23  | C22  | C21  | 111.19(16) |
| C4   | C3   | C2   | 112.99(15) | C24  | C23  | C22  | 112.51(16) |
| O4   | C4   | C3   | 122.40(17) | O6   | C24  | C23  | 122.43(17) |
| O4   | C4   | C5   | 122.38(18) | O6   | C24  | C25  | 122.25(18) |
| C3   | C4   | C5   | 115.22(16) | C23  | C24  | C25  | 115.32(16) |
| C4   | C5   | C6   | 110.79(16) | C24  | C25  | C26  | 110.21(16) |
| C14  | C5   | C4   | 110.23(15) | C34  | C25  | C24  | 109.92(15) |
| C14  | C5   | C6   | 114.23(16) | C34  | C25  | C26  | 115.00(16) |
| C5   | C6   | C1   | 114.26(15) | C25  | C26  | C21  | 113.61(15) |
| C7   | C6   | C1   | 105.54(15) | C27  | C26  | C21  | 104.38(14) |
| C7   | C6   | C5   | 111.28(16) | C27  | C26  | C25  | 111.86(16) |



|     |     |     |            |     |     |     |            |
|-----|-----|-----|------------|-----|-----|-----|------------|
| C8  | C7  | C6  | 106.83(15) | C28 | C27 | C26 | 106.39(15) |
| O3  | C8  | N1  | 126.74(18) | O5  | C28 | N2  | 126.59(18) |
| O3  | C8  | C7  | 125.60(18) | O5  | C28 | C27 | 126.15(18) |
| N1  | C8  | C7  | 107.65(15) | N2  | C28 | C27 | 107.22(15) |
| O1  | C9  | O2  | 125.71(19) | O7  | C29 | N2  | 109.46(15) |
| O1  | C9  | N1  | 124.82(18) | O8  | C29 | O7  | 125.93(18) |
| O2  | C9  | N1  | 109.47(16) | O8  | C29 | N2  | 124.61(17) |
| O2  | C10 | C11 | 110.6(2)   | O7  | C30 | C31 | 101.95(18) |
| O2  | C10 | C12 | 108.8(2)   | O7  | C30 | C32 | 108.58(18) |
| O2  | C10 | C13 | 102.1(2)   | O7  | C30 | C33 | 110.98(18) |
| C11 | C10 | C13 | 109.5(3)   | C32 | C30 | C31 | 111.7(2)   |
| C12 | C10 | C11 | 113.2(3)   | C33 | C30 | C31 | 109.9(2)   |
| C12 | C10 | C13 | 112.1(3)   | C33 | C30 | C32 | 113.2(2)   |
| C15 | C14 | C5  | 119.50(18) | C35 | C34 | C25 | 122.57(18) |
| C15 | C14 | C19 | 117.94(19) | C39 | C34 | C25 | 119.56(19) |
| C19 | C14 | C5  | 122.45(18) | C39 | C34 | C35 | 117.69(19) |
| C14 | C15 | C16 | 121.6(2)   | C36 | C35 | C34 | 121.2(2)   |
| C17 | C16 | C15 | 118.9(2)   | C37 | C36 | C35 | 119.1(2)   |
| C16 | C17 | C11 | 119.8(2)   | C36 | C37 | C12 | 119.50(19) |
| C16 | C17 | C18 | 121.1(2)   | C38 | C37 | C12 | 119.53(19) |
| C18 | C17 | C11 | 119.0(2)   | C38 | C37 | C36 | 121.0(2)   |
| C17 | C18 | C19 | 119.0(2)   | C37 | C38 | C39 | 119.2(2)   |
| C18 | C19 | C14 | 121.3(2)   | C34 | C39 | C38 | 121.9(2)   |

**Table S19 Hydrogen Atom Coordinates ( $\text{\AA} \times 10^4$ ) and Isotropic Displacement Parameters ( $\text{\AA}^2 \times 10^3$ ) for 17j.**

| Atom | x       | y        | z       | U(eq) |
|------|---------|----------|---------|-------|
| H2A  | 3500.67 | 5587.4   | 6317.88 | 34    |
| H2B  | 2632.69 | 7239.54  | 6042.48 | 34    |
| H3A  | 3029.92 | 5067.06  | 5341.08 | 38    |
| H3B  | 3430.85 | 7316.49  | 5239.84 | 38    |
| H5   | 5446.72 | 4943.65  | 6313.01 | 29    |
| H6   | 5514.94 | 9092.56  | 5924.02 | 29    |
| H7A  | 6707.51 | 7582.77  | 6844.56 | 34    |
| H7B  | 6461.86 | 9966.29  | 6745.09 | 34    |
| H11A | 1418.99 | 6335.55  | 7368.74 | 99    |
| H11B | 612.58  | 7850.71  | 7591.22 | 99    |
| H11C | 1871.29 | 7910.22  | 7849.11 | 99    |
| H12A | 2037.36 | 11552.18 | 7650.98 | 144   |
| H12B | 813.12  | 11861.35 | 7348.96 | 144   |
| H12C | 1768.57 | 12380.88 | 7033.96 | 144   |
| H13A | 773.5   | 9971.71  | 6281.78 | 133   |
| H13B | -68.4   | 9224.65  | 6644.15 | 133   |
| H13C | 690.13  | 7609.58  | 6422.23 | 133   |
| H15  | 6754.05 | 2473.53  | 6117.14 | 43    |
| H16  | 8469.34 | 1735.79  | 5923.99 | 52    |
| H18  | 8734.94 | 7643.66  | 5444.47 | 54    |
| H19  | 7013.87 | 8351.52  | 5632.5  | 44    |
| H20A | 3063.38 | 10927.75 | 6130.67 | 50    |

|      |          |          |         |    |
|------|----------|----------|---------|----|
| H20B | 3782.4   | 10661.79 | 5671.88 | 50 |
| H20C | 4282.39  | 11708.89 | 6246.03 | 50 |
| H22A | 6572.56  | 917.35   | 8709.74 | 34 |
| H22B | 7419.81  | 2589.36  | 8993.83 | 34 |
| H23A | 6973.09  | 473.47   | 9692.34 | 38 |
| H23B | 6535.85  | 2716.79  | 9769.41 | 38 |
| H25  | 4561.51  | 399.06   | 8670.15 | 30 |
| H26  | 4591.35  | 4509.92  | 9101.94 | 30 |
| H27A | 3291.03  | 3339.42  | 8189.8  | 37 |
| H27B | 3731.42  | 5633.73  | 8275.22 | 37 |
| H31A | 9299.88  | 5677.16  | 8485.71 | 83 |
| H31B | 10109.89 | 4000.26  | 8334.18 | 83 |
| H31C | 9288.79  | 3419.87  | 8724.95 | 83 |
| H32A | 8430.58  | 530.4    | 8091.17 | 85 |
| H32B | 9315.58  | 957.06   | 7724.47 | 85 |
| H32C | 8065.07  | 970.32   | 7448.57 | 85 |
| H33A | 8140.08  | 4481.65  | 7079.61 | 68 |
| H33B | 9383.25  | 4848.41  | 7338.01 | 68 |
| H33C | 8489.99  | 6362.19  | 7483.42 | 68 |
| H35  | 3022.48  | 3793.59  | 9370.65 | 43 |
| H36  | 1307.15  | 3089.22  | 9569.15 | 51 |
| H38  | 1515.7   | -2757.25 | 9040.51 | 55 |
| H39  | 3224.01  | -2036.55 | 8843.88 | 47 |
| H40A | 7006.73  | 6247.15  | 8803.12 | 48 |
| H40B | 6356.2   | 6081.59  | 9293.14 | 48 |
| H40C | 5791.48  | 7039     | 8717.06 | 48 |
